# Supplementary material for: HAG1 and SWI3A/B control of male germ line development in P. patens suggests conservation of epigenetic reproductive control across land plants
Source: Springer Nature journal article supplement (doi:10.1007/s00497-021-00409-0), 2021-04-11
Supplement: MOESM1 [file 497_2021_409_MOESM1_ESM.pdf]

## Supplementary material for Genau et al.

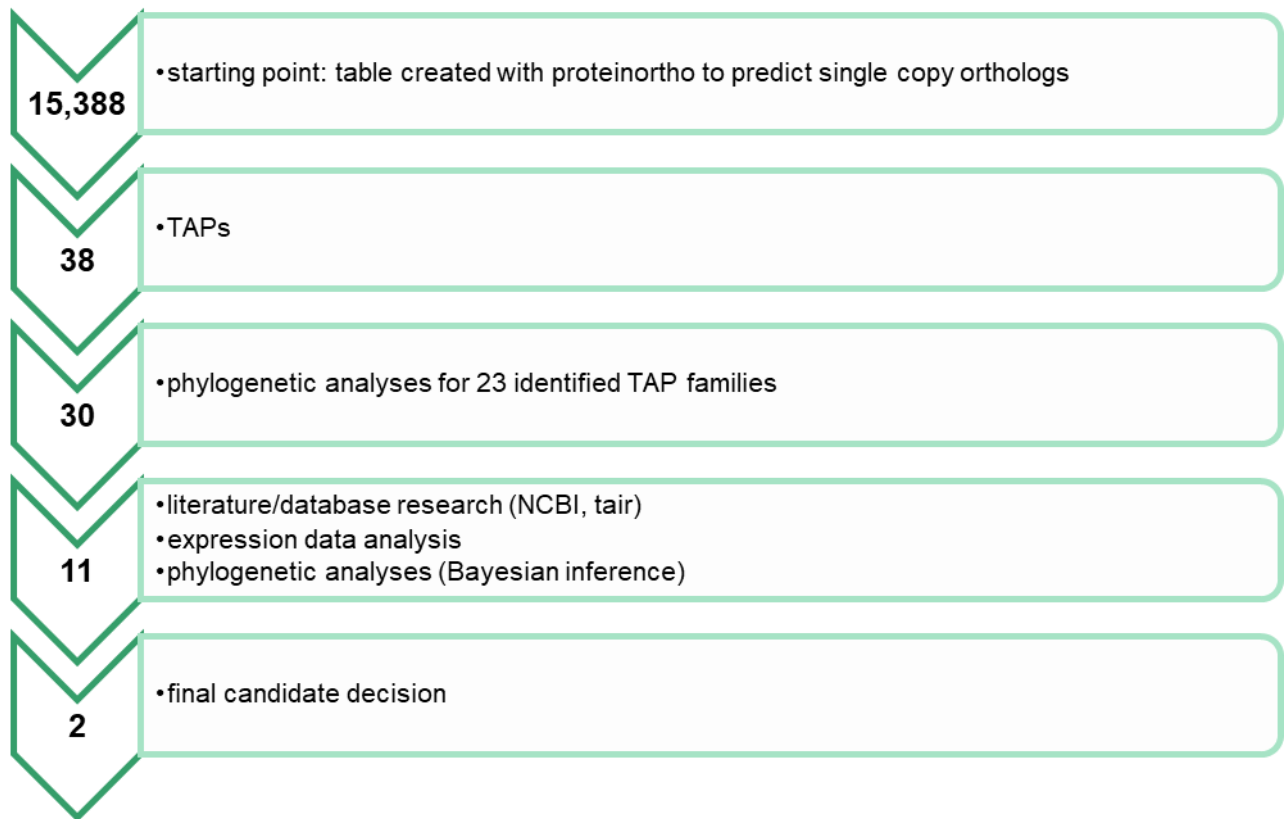

**Figure S1: Workflow of phylogenetic singly copy TF/TR screening.**

Based on a proteinortho [1] run 15,388 *P. patens*, 12,478 *M. polymorpha* and 14755 *A. thaliana* orthologous groups were filtered according to single copy status in each species. These proteins were scanned further using TAPscan [2], yielding 38 proteins classified into 23 TAP (TF or TR) families (GNAT, MYB-related, SET/Sigma70-like, FHA, PcG\_MSI, Jumonji\_Other, IWS1, C3H, C2H2, bHLH, TANGO2, tify, TUB, WRKY, MADS, Med7, O-FucT, BES1, CCAAT\_HAP3, GRAS, HMG, ARID and Med6). For these 23 families, phylogenetic inference using Neighbour-Joining with quicktree-SD [3] was performed using the proteins of *Arabidopsis thaliana*, *Anthoceros agrestis*, *Marchantia polymorpha*, *Physcomitrium patens* as well as *Oryza sativa* to verify single copy status in the three bryophytes of interest, leading to removal of 8 genes on account of unclear/lack of orthology. For the remaining 30 proteins initial literature and expression analyses were conducted, narrowing them down to 11 candidates (Table S1) from which 2 were selected for this study.

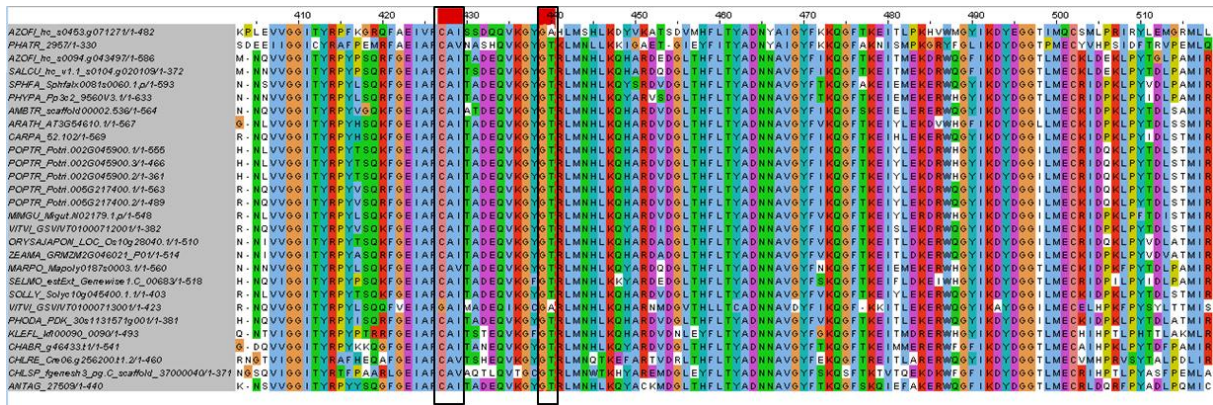

Figure S2: Multiple sequence alignment of the GNAT domain of HAG1.

The conserved Coenzyme A binding pocket is marked by black boxes.

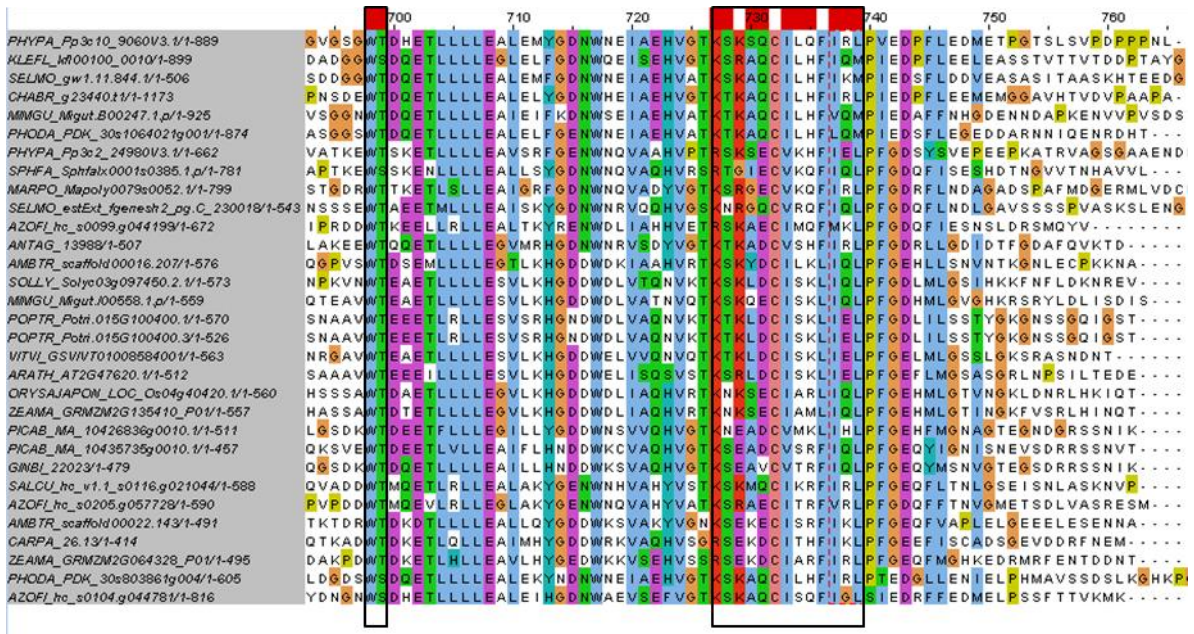

Figure S3: Multiple sequence alignment of part of the SANT/MYB domain of SWI3A/B.

The potential DNA binding sites of the MYB domain are marked by black boxes.

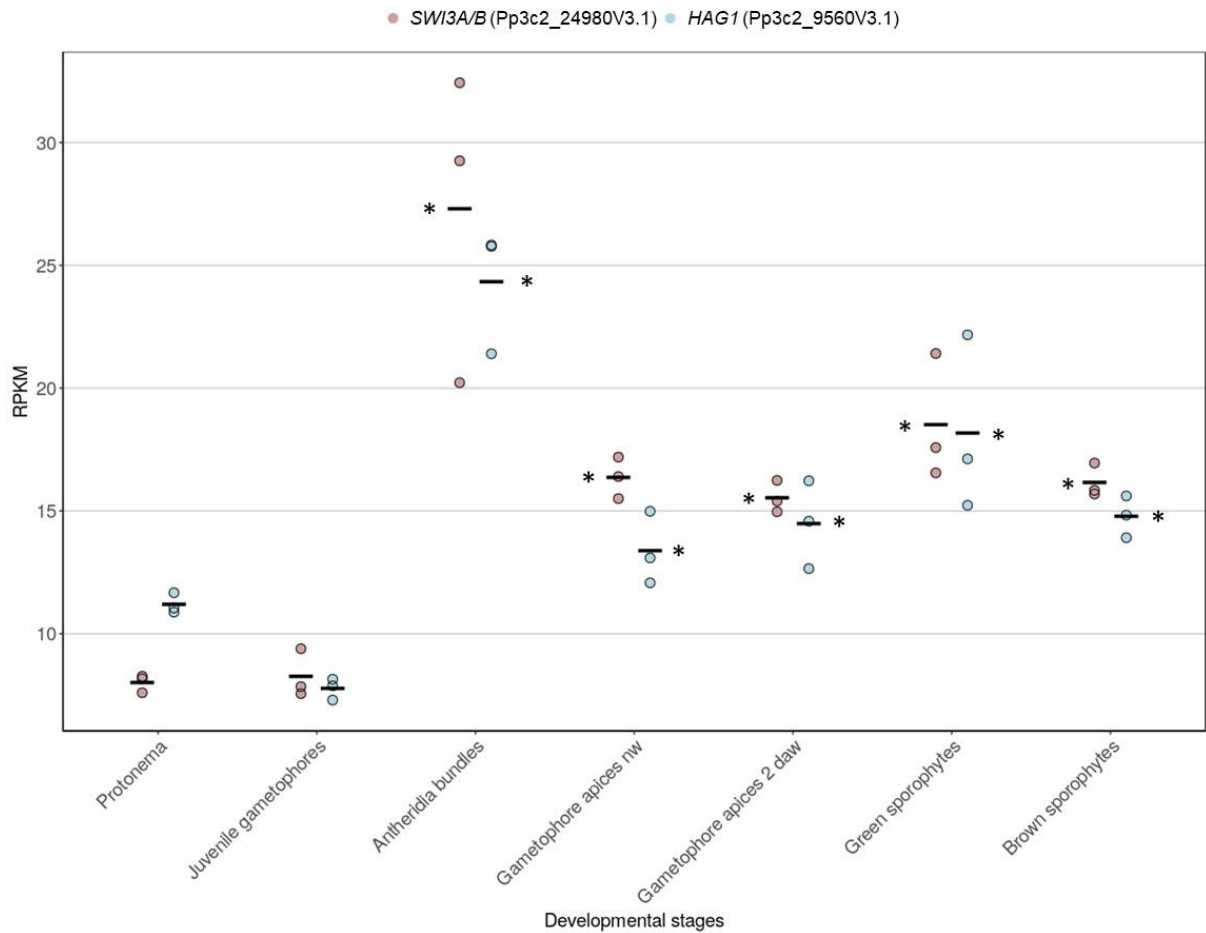

**Figure S4: RNA-seq expression profile of *PpHAG1* (Pp3c2\_9560V3.1, histone acetyltransferase) and *PpSWI3A/B* (Pp3c2\_24980V3.1, chromatin remodelling complex subunit).**

Data are from [4], antheridia bundles from [5] and apices from this study. The highest expression of both genes can be detected in antheridia bundles, but expression in all reproductive stages shown is significantly (t-test,  $p < 0.05$ ; asterisks) higher than in the vegetative control (protonema and juvenile = asexual gametophores). Expression data in archegonia, representing the female germ line [6] is not significantly higher than in vegetative tissue (data not shown because from microarray / different scale). Gametophore apices feature gametangia (female archegonia and male antheridia). Green sporophytes are pre-meiotic, brown sporophytes post-meiotic. RPKM is Reads Per Kbp (of transcript) and Million (of reads); data were generated according to standardized procedures allowing to compare across samples [7].

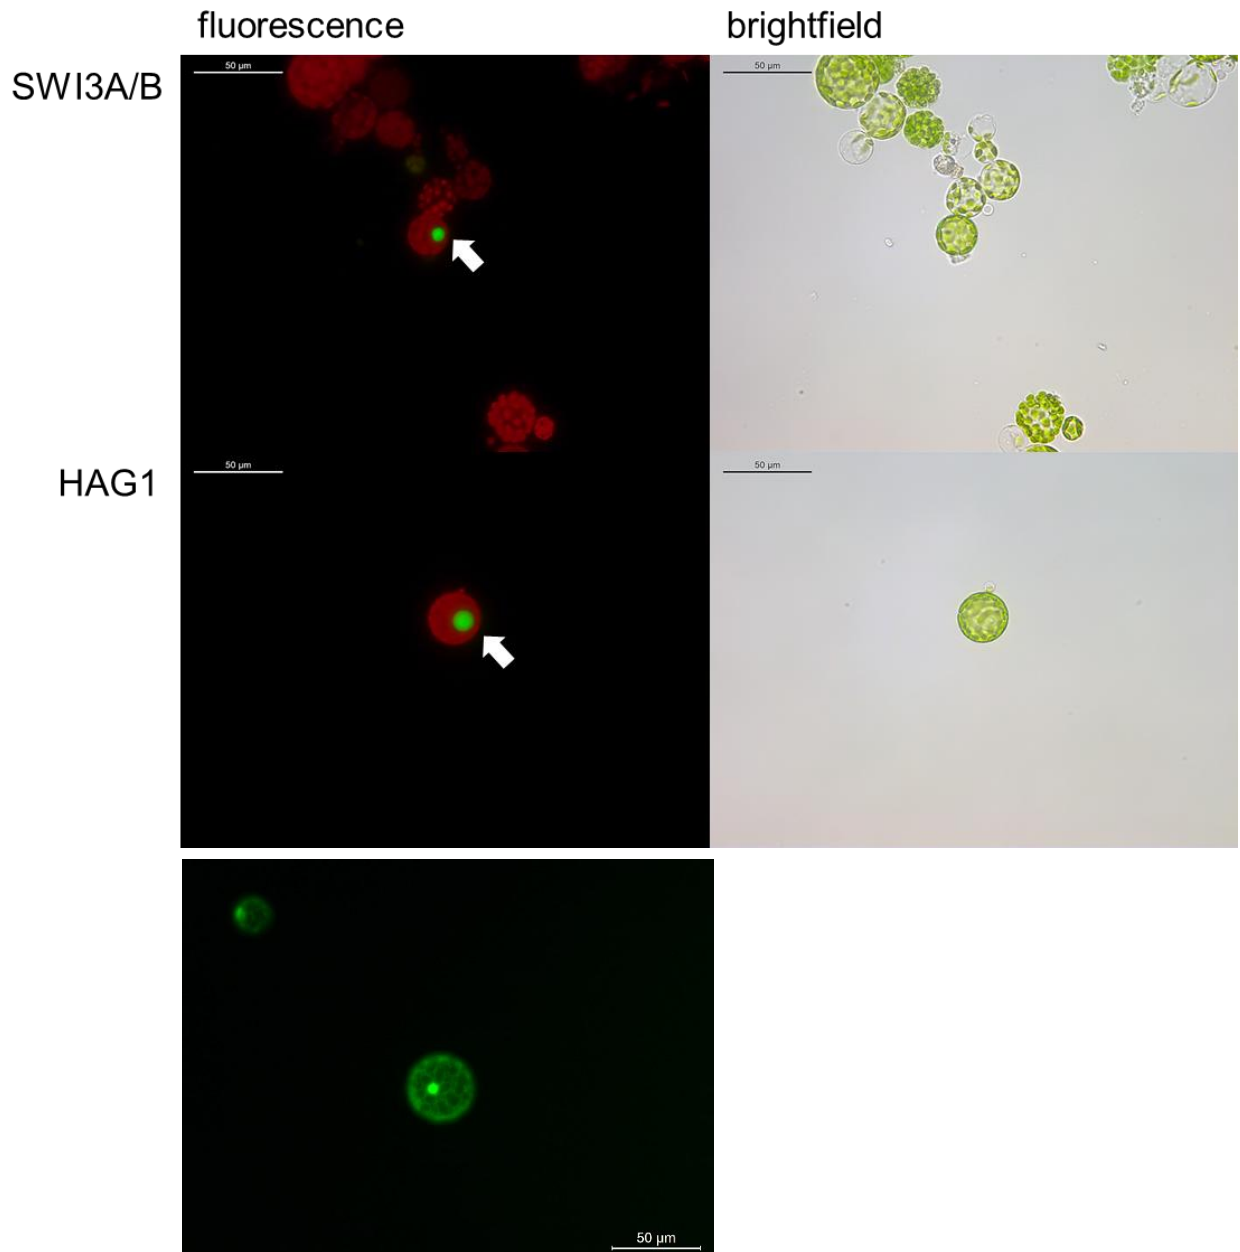

**Figure S5: *In vivo* localization analysis.**

Transient expression of PpSWI3A/B and PpHAG1 fused to a C-terminal GFP. The white arrows indicate the nuclear localization. A protoplast transiently expressing GFP in the nucleo-/cytoplasm is shown for comparison.

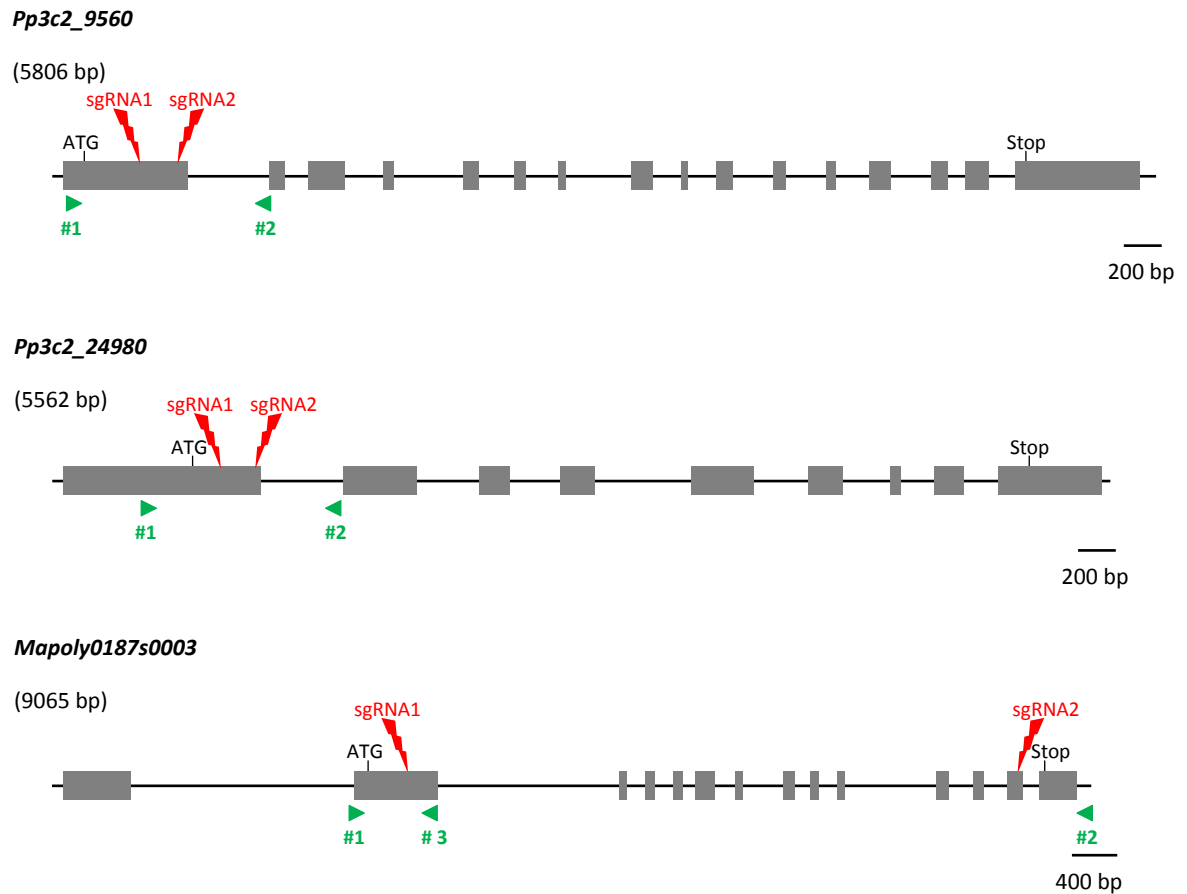

**Figure S6: Structure of the *Pp3c2\_9560*, *Pp3c2\_24980* and *Mapoly0187s0003* targeted genes.**

Structure of the *Pp3c2\_9560*, *Pp3c2\_24980* and *Mapoly0187s0003* genes with their respective sgRNAs positions. Boxes represent the exons and black lines represent the introns. The two sgRNAs positions are indicated (in red). Green arrows represent the primers used for PCR and sequencing.



901 915

Wild-Type ATGGAGTTGCATAGT  
Swi3a/b-1 ATGGAGTTGCATAGT  
Swi3a/b-2 ATGGAGTTGCATAGT  
Swi3a/b-3 ATGGAGTTGCATAGT

B

1 100  
Wild-Type TCCAACGGTGATTCTCGCAGCGTAAGAATCAATCACTGCTCTAGATTGAAATGGTGGCAGAGATGGCGTCACAGCAGTTCTCGGTGACGCTGTGCCATC  
hag1-1 TCCAACGGTGATTCTCGCAGCGTAAGAATCAATCACTGCTCTAGATTGAAATGGTGGCAGAGATGGCGTCACAGCAGTTCTCGGTGACGCTGTGCCATC  
hag1-2 TCCAACGGTGATTCTCGCAGCGTAAGAATCAATCACTGCTCTAGATTGAAATGGTGGCAGAGATGGCGTCACAGCAGTTCTCGGTGACGCTGTGCCATC  
hag1-3 TCCAACGGTGATTCTCGCAGCGTAAGAATCAATCACTGCTCTAGATTGAAATGGTGGCAGAGATGGCGTCACAGCAGTTCTCGGTGACGCTGTGCCATC

101 200  
Wild-Type GCCATCGCCATCGCCGTCGTATTTCGTCATTAAGCGGGTCCAGTCAGAAACGGAAACGATCCGCGCAGGATGCTGCTGCAACGGCAGACGAGTTTGTGGCA  
hag1-1 GCCATCGCCATCGCCGTCGTATTTCGTCATTAAGCGGGTCCAGTCAGAAACGGAAACGATCCGCGCAGGATGCTGCTGCAACGGCAGACGAGTTTGTGGCA  
hag1-2 GCCATCGCCATCGCCGTCGTATTTCGTCATTAAGCGGGTCCAGTCAGAAACGGAAACGATCCGCGCAGGATGCTGCTGCAACGGCAGACGAGTTTGTGGCA  
hag1-3 GCCATCGCCATCGCCGTCGTATTTCGTCATTAAGCGGGTCCAGTCAGAAACGGAAACGATCCGCGCAGGATGCTGCTGCAACGGCAGACGAGTTTGTGGCA

201 300  
Wild-Type AACTCCCCGAACCCCTTCCCTCCAACCACTCCAACGCTCACATCAAAGCGTCCACCAATCTTCTCAC.....  
hag1-1 AACTCCCCGAACCCCTTCCCTCCAACCACTCCAACGCTCACATCAAAGCGTCCACCAATCTTCTCAC.....  
hag1-2 AACTCCCCGAACCCCTTCCCTCCAACCACTCCAACGCTCACATCAAAGCGTCCACCAATCTAAACCTAAACCTAAACCTAAAC.....  
hag1-3 AACTCCCCGAACCCCTTCCCTCCAACCACTCCAACGCTCACATCAAAGCGTCCACCAATCTTCTCAATC.....

301 400  
Wild-Type AGCAGCATCCGATTATAATGCCGTTGTCTCGTGGACTCGCAGCACAGCTGCCGGAATAACCCGGGAGCTCGCTGGAGGATGAGGACGATGGGGAAAA  
hag1-1 .....  
hag1-2 .....  
hag1-3 .....

401 500  
Wild-Type TGGAGGGCATCATCAGTCATGTCTCCGATGGGGTCAAGAATGGGCTAGCTATGGTTCGGTTCGAAGGTGCGAACGGCGGTGGGGATGGGGATGAAGAG  
hag1-1 .....GTGGGATGGGGATGAAGAG  
hag1-2 .....CGGCGGTGGGGATGGGGATGAAGAG  
hag1-3 .....CGGCGGTGGGGATGGGGATGAAGAG

501 600  
Wild-Type GAGGACGACGATGAGGAGGAAGGCGAAGCGAAGAAAGAAAGGAGAGCACGACGAAAGGTAACCCCTAAACCTTGGTATGCCTTCGCAATCAGCGTTCT  
hag1-1 GAGGACGACGATGAGGAGGAAGGCGAAGCGAAGAAAGAAAGGAGAGCACGACGAAAGGTAACCCCTAAACCTTGGTATGCCTTCGCAATCAGCGTTCT  
hag1-2 GAGGACGACGATGAGGAGGAAGGCGAAGCGAAGAAAGAAAGGAGAGCACGACGAAAGGTAACCCCTAAACCTTGGTATGCCTTCGCAATCAGCGTTCT  
hag1-3 GAGGACGACGATGAGGAGGAAGGCGAAGCGAAGAAAGAAAGGAGAGCACGACGAAAGGTAACCCCTAAACCTTGGTATGCCTTCGCAATCAGCGTTCT

601 700  
Wild-Type TGCTCAGGCATTGGAACGGATCCTGACGATTGTGATCTGTTGTCTTATCTTCTTCTTCTTATTTTATTTTAAAGCCTACTTTGCAACTTGAAGA  
hag1-1 TGCTCAGGCATTGGAACGGATCCTGACGATTGTGATCTGTTGTCTTATCTTCTTCTTCTTATTTTATTTTAAAGCCTACTTTGCAACTTGAAGA  
hag1-2 TGCTCAGGCATTGGAACGGATCCTGACGATTGTGATCTGTTGTCTTATCTTCTTCTTCTTATTTTATTTTAAAGCCTACTTTGCAACTTGAAGA  
hag1-3 TGCTCAGGCATTGGAACGGATCCTGACGATTGTGATCTGTTGTCTTATCTTCTTCTTCTTATTTTATTTTAAAGCCTACTTTGCAACTTGAAGA

701 800  
Wild-Type CTATGCAGGAGCTTTAGCAGAGGGCTGTTTGAATGTTGGATAATGATCTTGCTTGTTTTAACTTTTAAAGATGACGGTAGTGTGGCACAATGATCGT  
hag1-1 CTATGCAGGAGCTTTAGCAGAGGGCTGTTTGAATGTTGGATAATGATCTTGCTTGTTTTAACTTTTAAAGATGACGGTAGTGTGGCACAATGATCGT  
hag1-2 CTATGCAGGAGCTTTAGCAGAGGGCTGTTTGAATGTTGGATAATGATCTTGCTTGTTTTAACTTTTAAAGATGACGGTAGTGTGGCACAATGATCGT  
hag1-3 CTATGCAGGAGCTTTAGCAGAGGGCTGTTTGAATGTTGGATAATGATCTTGCTTGTTTTAACTTTTAAAGATGACGGTAGTGTGGCACAATGATCGT

```

Wild-Type  ATCTTTTATTTTTGTTTTTTTACGGCTGCCTTAATTTGTGGAACTGACTGAGAATGTGATCGTATCTCGGGAGCACCT
hag1-1    ATCTTTTATTTTTGTTTTTTTACGGCTGCCTTAATTTGTGGAACTGACTGAGAATGTGATCGTATCTCGGGAGCACCT
hag1-2    ATCTTTTATTTTTGTTTTTTTACGGCTGCCTTAATTTGTGGAACTGACTGAGAATGTGATCGTATCTCGGGAGCACCT
hag1-3    ATCTTTTATTTTTGTTTTTTTACGGCTGCCTTAATTTGTGGAACTGACTGAGAATGTGATCGTATCTCGGGAGCACCT

```

**Figure S7: Sequence alignment of the targeted regions in the *HAG1* and *SWI3A/B* genes in the wild-type and respective mutants.**

Alignment of (A) *SWI3A/B* and *swi3a/b-1*, *swi3a/b-2* and *swi3a/b-3* CRISPR-Cas targeted region, and (B) *HAG1* and *hag1-1*, *hag1-2* and *hag1-3* CRISPR-Cas targeted region. *SWI3A/B* (Pp3c2\_24980); *HAG1* (Pp3c2\_9560). Sequences of the sgRNAs used in this study to produce the mutants are in green (PAMs in bold). Substitutions, deletions, or insertions are indicated in red. Primers used to amplify and sequence the *HAG1* or *SWI3A/B* regions are in blue.

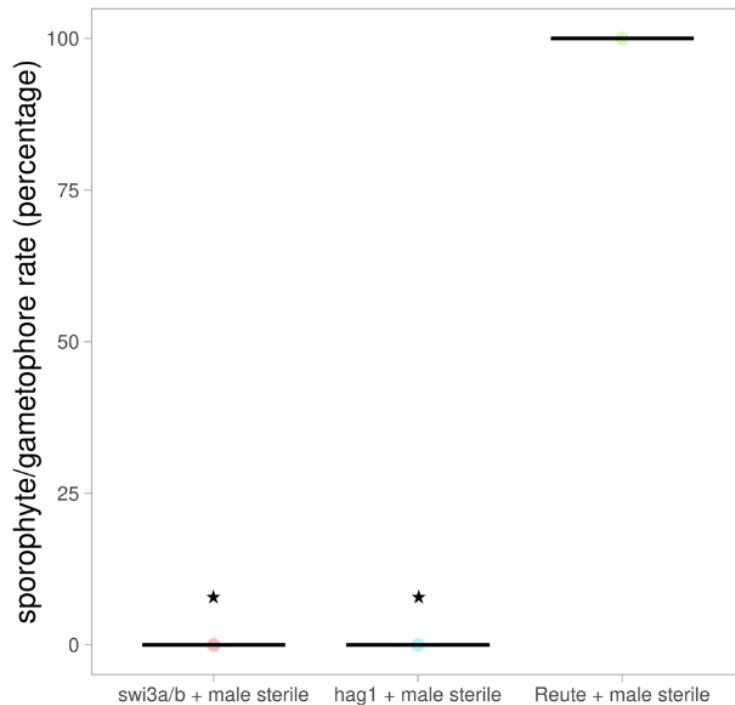

**Figure S8: Crossing with a male infertile strain to test for male impairment.**

*Pphag1* (blue), *Ppswi3a/b* (red) and the control (Reute, green) were crossed with a male infertile strain [5]. Reute developed 100% of sporophytes per gametophore (through selfing), whereas *Ppswi3a/b* and *Pphag1* developed no sporophytes, which is a significant reduction (asterisks) ( $p < 0,01$ , Fisher's exact test). The total number of gametophores analysed per mutant/control was 73 each. The dots indicate the rate of sporophytes per gametophore as percentage relative to the total number of gametophores.



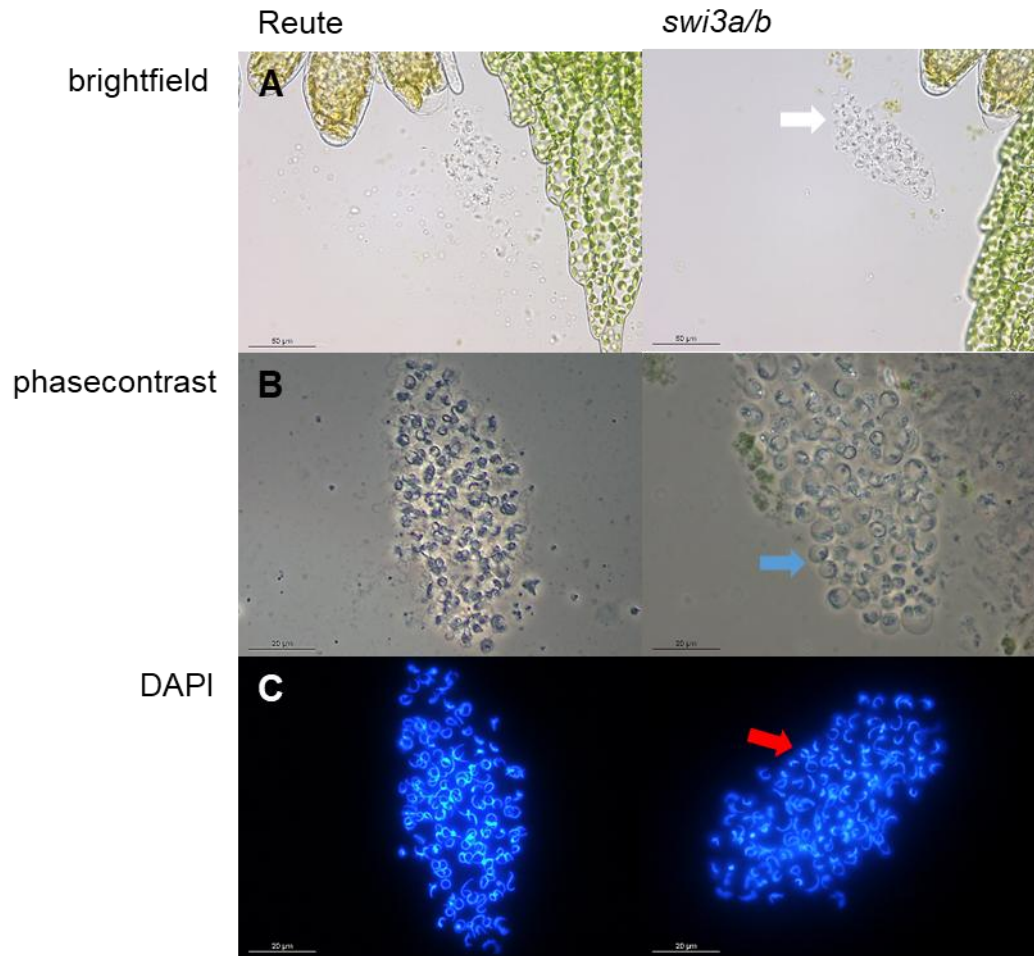

**Figure S9: Spermatozoid analysis of Ppswi3a/b 21 dpi.**

A) While spermatozooids of Reute as control start to move and swim shortly after release, *swi3a/b* spermatozooids are unable to swim and stick together without moving away from the antheridial bundle (indicated by white arrow). B) Phase contrast images of Reute and Ppswi3a/b. The spermatozooids of *swi3a/b* show caviar-like structures (indicated by blue arrow); cf. Figs. 6/S11. C) The DAPI staining shows fully condensed nuclei in Reute, whereas Ppswi3a/b nuclei show slight structural abnormalities / show (indicated by red arrow, cf. Fig. 6).

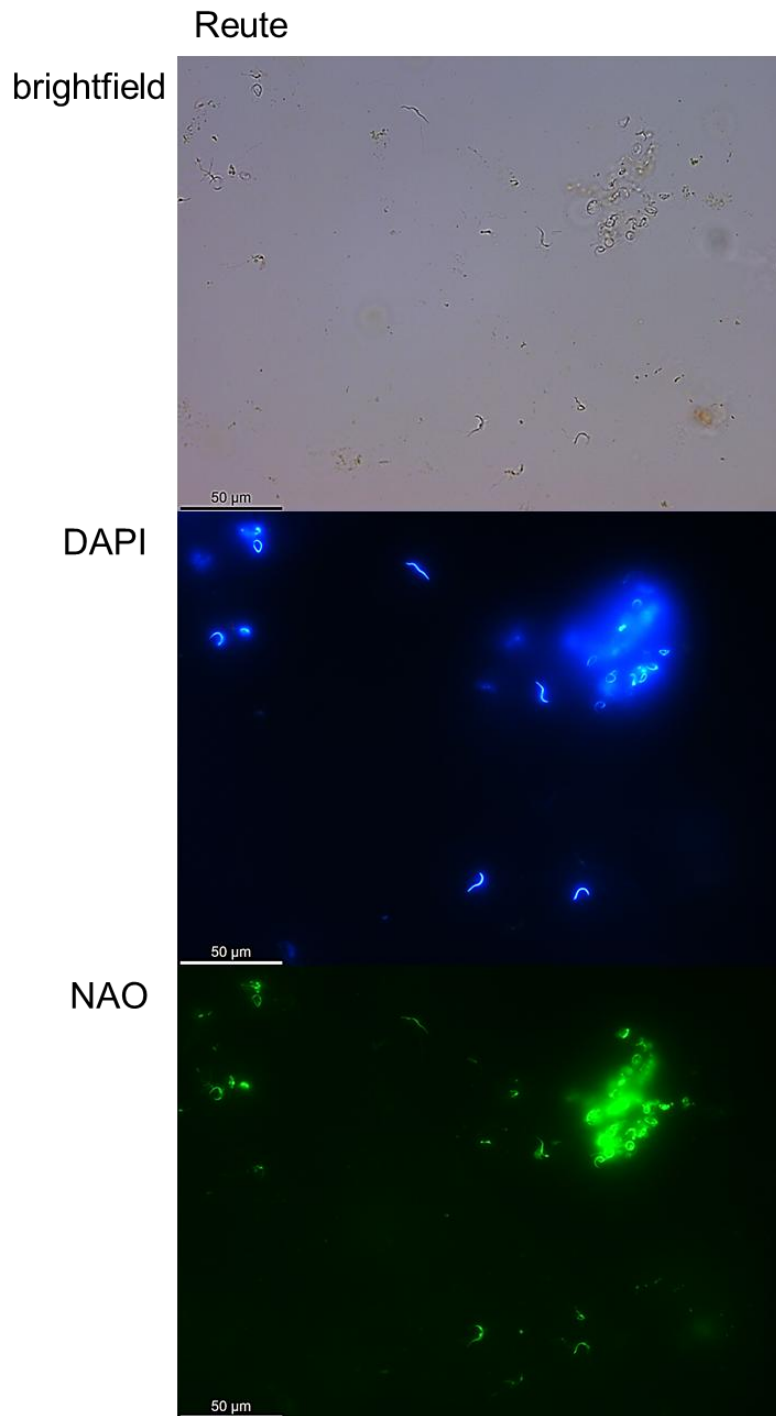

**Figure S10: Spermatozoid analysis via a double staining with DAPI and NAO.**

Several released Reute (control) spermatozooids are shown with their slender shape and fully reduced cytoplasm.

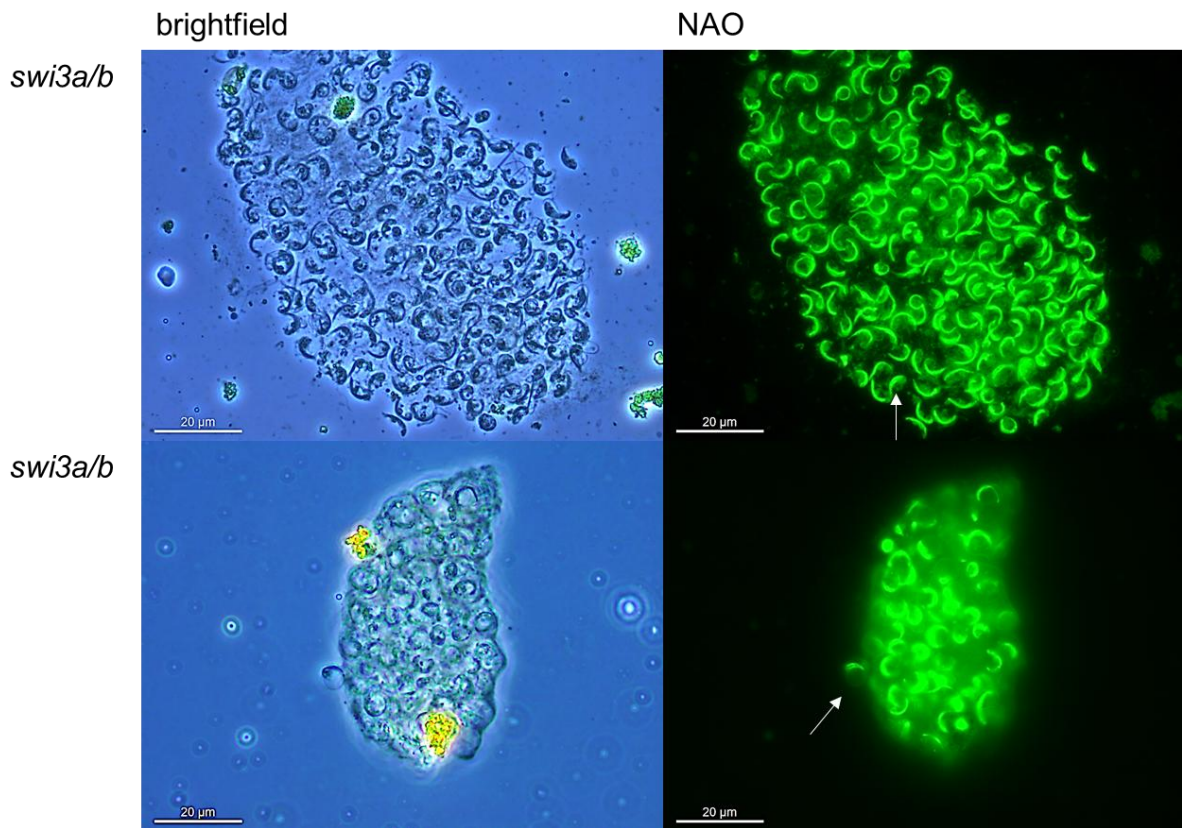

**Figure S11: Spermatozoid analysis via staining with NAO.**

*Ppswi3a/b* antheridia release spermatozoa, which however are embedded in a matrix that may form a caviar-like bubbles (in which the condensing nucleus is surrounded by the extraplasmatic matrix in which gametes differentiate, bottom panel), and/or show incomplete cytoplasmic reduction (upper panel) (white arrows).

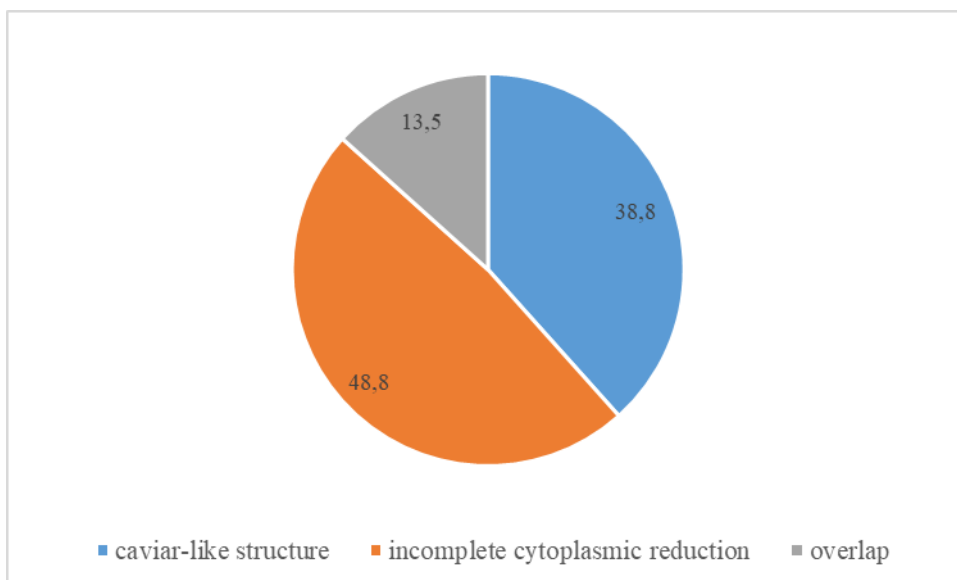

**Figure S12: Light microscopical analysis of *Ppswi3a/b* antheridia.**

The Caviar-like structure could be seen in 37.8% of the analyzed pictures, whereas the incomplete cytoplasmic reduction was observed in 48.8% of analyzed pictures. An overlap of caviar-like structures and incomplete cytoplasmic reduction was observed in 13.5% of analyzed pictures. 37 pictures were analyzed in total.

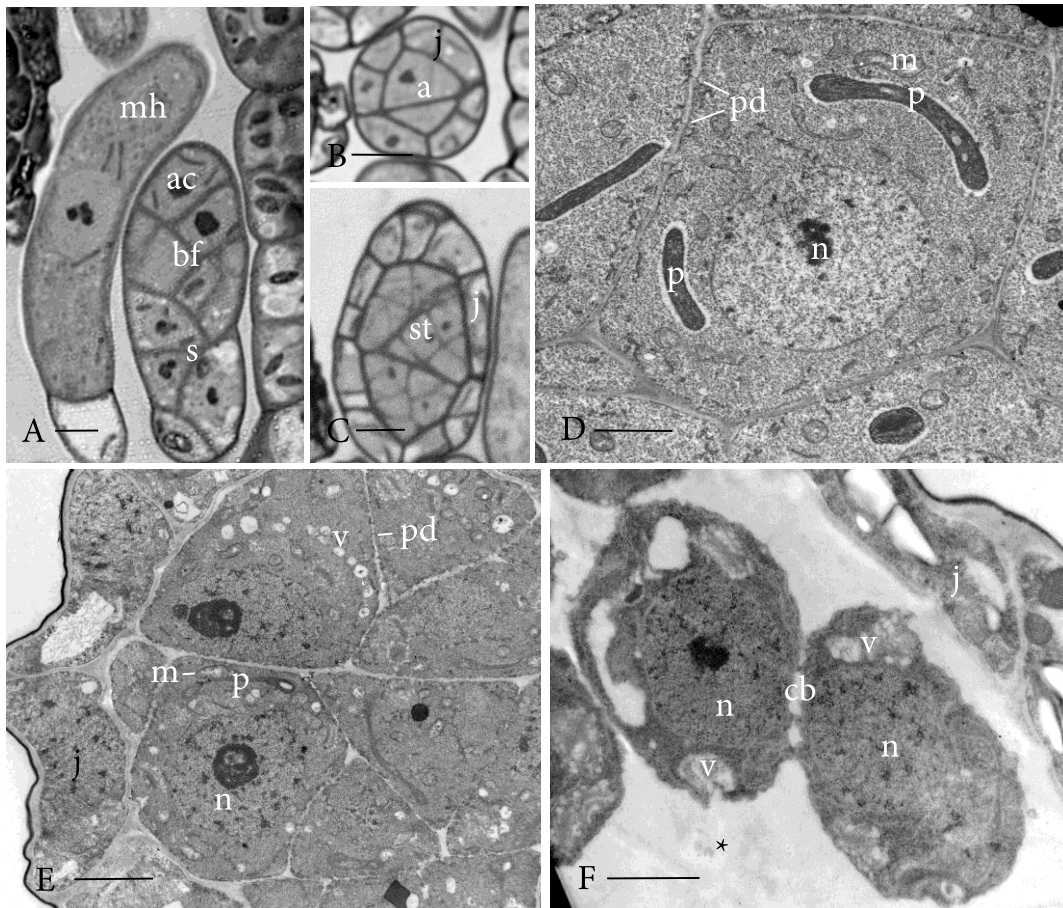

**Figure S13: Antheridial develop in Reute and *Ppswi3a/b***

Antheridial development and early spermatids before origin of locomotory apparatus are identical in Reute control and *Ppswi3a/b*. A) Light micrograph (LM) longitudinal section of a developing antheridium with stalk cells (s) showing triangular apical cell (ac) and beginning of biseriate filament (bf) next to a mucilage hair (mh) (Reute). B) LM cross section of the body of an antheridium with two primary androgones (a) surrounded by newly formed jacket cell (j) (*Ppswi3a/b*). C) LM longitudinal section of developing antheridium with spermatogenous tissue (st) surrounded by jacket cells (j) (Reute). D) Transmission electron micrograph (TEM) of dense spermatogenous cell full of ribosomes and endoplasmic reticulum with large nucleus (n), mitochondria (m) and two plastids (p) at the poles preparing for mitosis. Plasmodesmata (pd) are abundant in young walls (Reute). E) TEM of nascent spermatid with large nucleus (n) and dense cytoplasm containing abundant ribosomes, ER, vesicles (v), a single plastid (p) and numerous plasmodesmata (pd), surrounded by jacket cells (j) (*Ppswi3a/b*). F) Young spermatids deposit thick cell wall (\*) via vesicles (v) and round out prior to developing the locomotory apparatus. Pairs of spermatids with large nuclei (n) are connected by expanded plasmodesmata that form cytoplasmic bridges (cb). Jacket cells (j) border the antheridium (*Ppswi3a/b*). Bars: A-C = 10  $\mu$ m; D-F = 2 $\mu$ m.

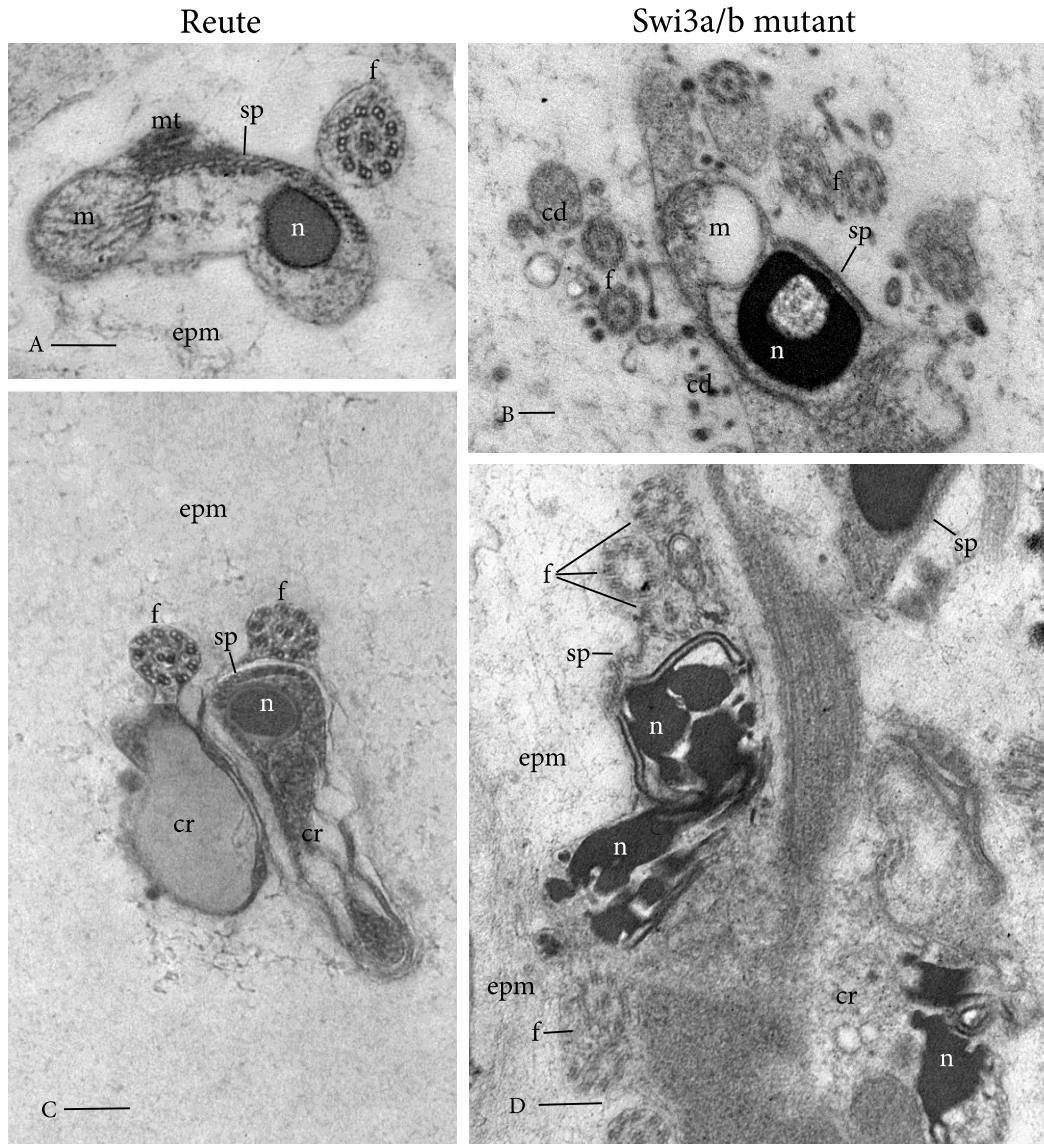

**Figure S14: TEM details of mature, unreleased spermatozoids in Reute and Ppswi3a/b**

Reute control in left column and Ppswi3a/b mutant in right column. A) Cross section of front of the spermatozoid showing condensed nucleus (n) and mitochondrion (m) under a broad spline (sp) composed of a band of 23 microtubules. The 9+2 flagellum (f) and microtubules (mt) that identify the insertion of the second flagellum are visible. The extraprotoplasmic matrix (epm) is homogeneous with scattered fibrils and devoid of debris. B) Cross section of the spermatozoid more or less comparable to that of A) showing mitochondrion (m) and unevenly condensed nucleus (n) under a spline (sp). Due to the disrupted development in the mutant, the numerous profiles of flagella (f) are haphazardly arranged, and the cytoplasm debris (cd) fills the extraprotoplasmic matrix (epm). C) Cross section of posterior cell profile showing two flagella (f) and a spline (sp) of +/- 12 microtubules over condensed nucleus (n). The homogeneous extraprotoplasmic matrix (epm) is devoid of cytoplasmic debris and the cytoplasmic remnants (cr) are attached to the cell. D) The mutant has multiple disruptions of the flagella (f), nuclear condensation (n), and spline arrangement (sp). The cytoplasm contains massive and irregular cytoplasmic remnants (cr) and the extraprotoplasmic matrix (epm) contains irregular fibrils and cytoplasmic debris. Bars: A-D = 0.2  $\mu$ m.

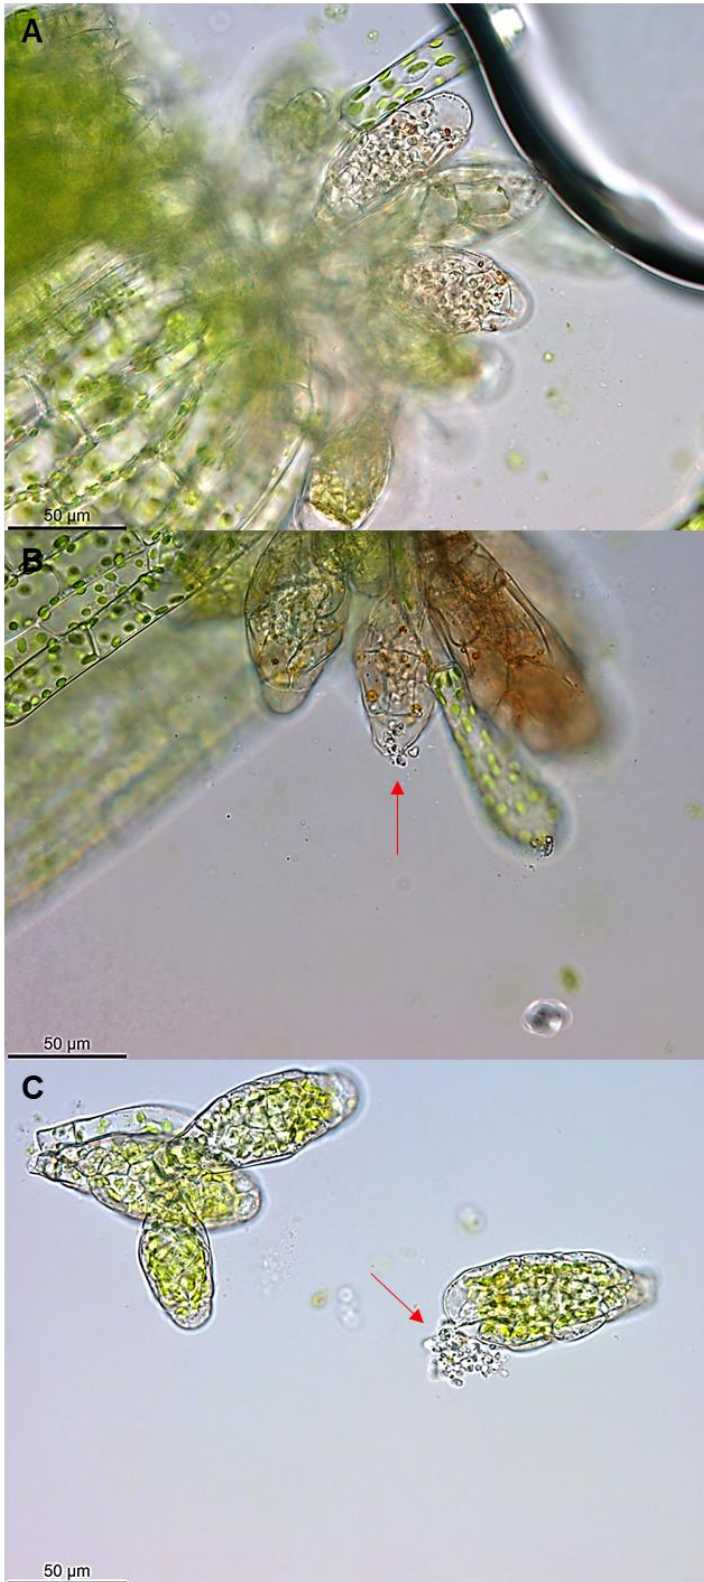

**Figure S15: *Pphag1* antheridia development 28 dpi.**

A) Closed antheridia turned brownish and discolored. B/C) Opened antheridia released round, bulky spermatozoid agglomerates (indicated by red arrows).

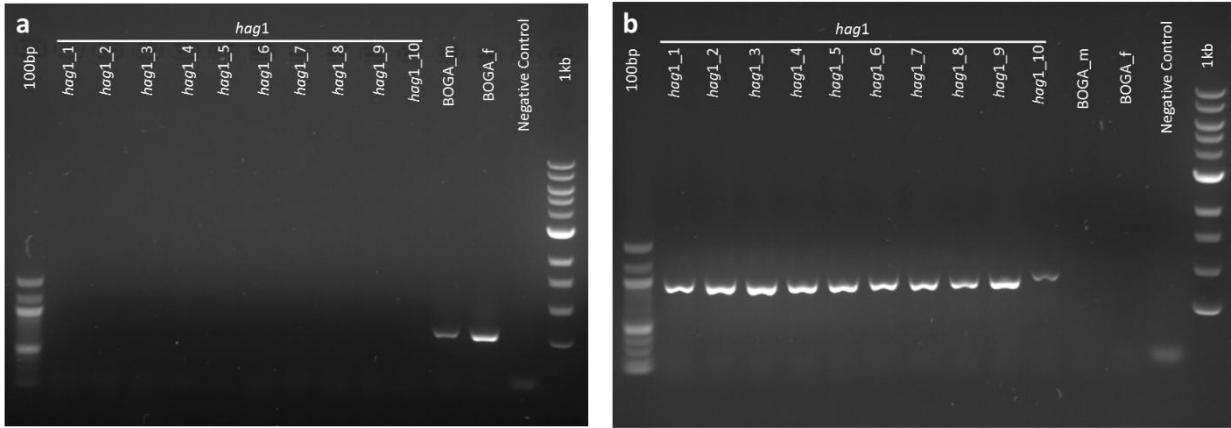

**Figure S16: Genotyping of *M. polymorpha* *hag1* mutants.**

Presence of the wild type locus was tested using M187s0003\_geno\_fwd/M187s0003\_geno\_rev (Table S4). Loss of the wild type locus was verified using M187s0003\_geno\_fwd/ M187s0003\_geno\_rev2.

WT

*Mphag1*

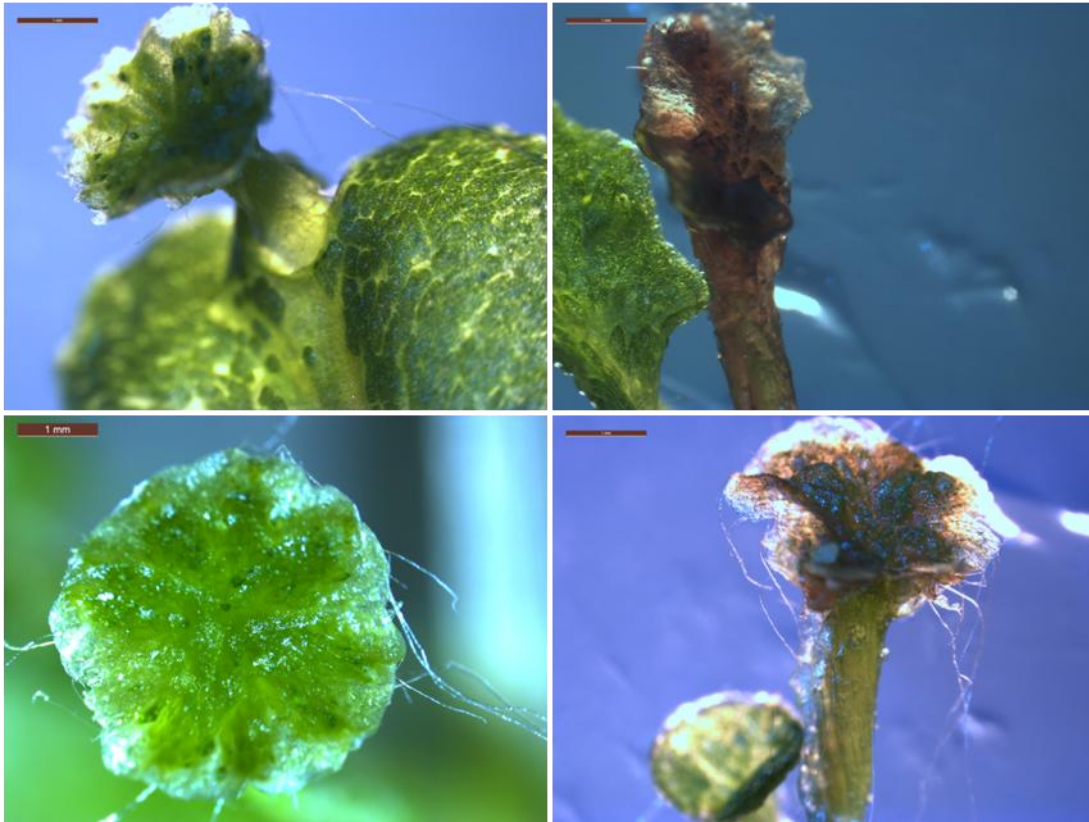

**Figure S17: Antheridiophore development of *Mphag1* mutants compared to the control.**

Gametangiophores (antheridiophores) developed on top of the thallus after cold and far-red light induction for four weeks. The mutant shows compared to the wild type distorted antheridiophores, occurring before the antheridial receptacle shallowly divided into eight lobes, which has been recognized as a characteristic of antheridial maturity [8].



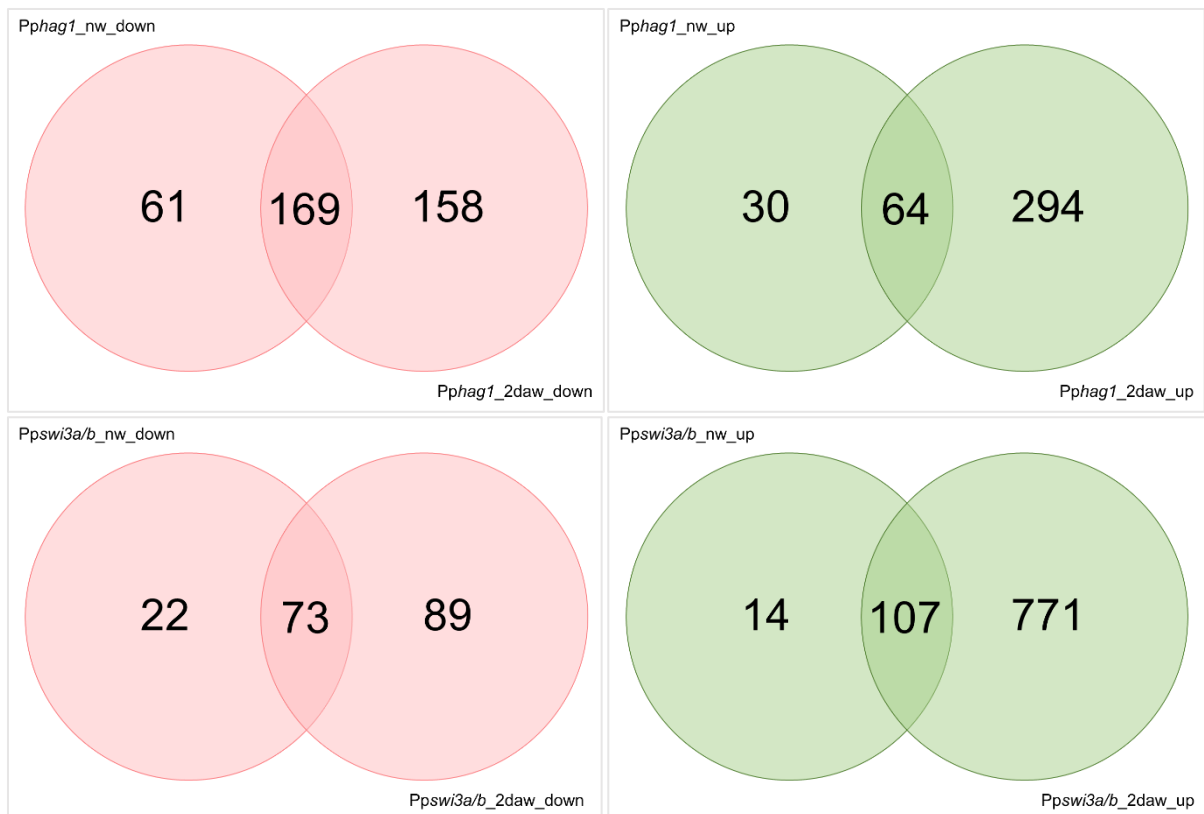

**Figure S18: RNA-seq analysis, DEGs.**

Number of DEGs 21 dpi of gametangiogenesis induction (nw = not watered), respectively two days after watering (2daw/23dpi). Each Venn diagram compares the DEGs between the two conditions 21 dpi and 2 daw. The color code indicates up-regulated DEGs (green) in the respective mutant (*Pphag1*/*Ppswi3a/b*) compared to the control as well as down-regulated DEGs (red) in the respective mutant (*Pphag1*/*Ppswi3a/b*) compared to the control.

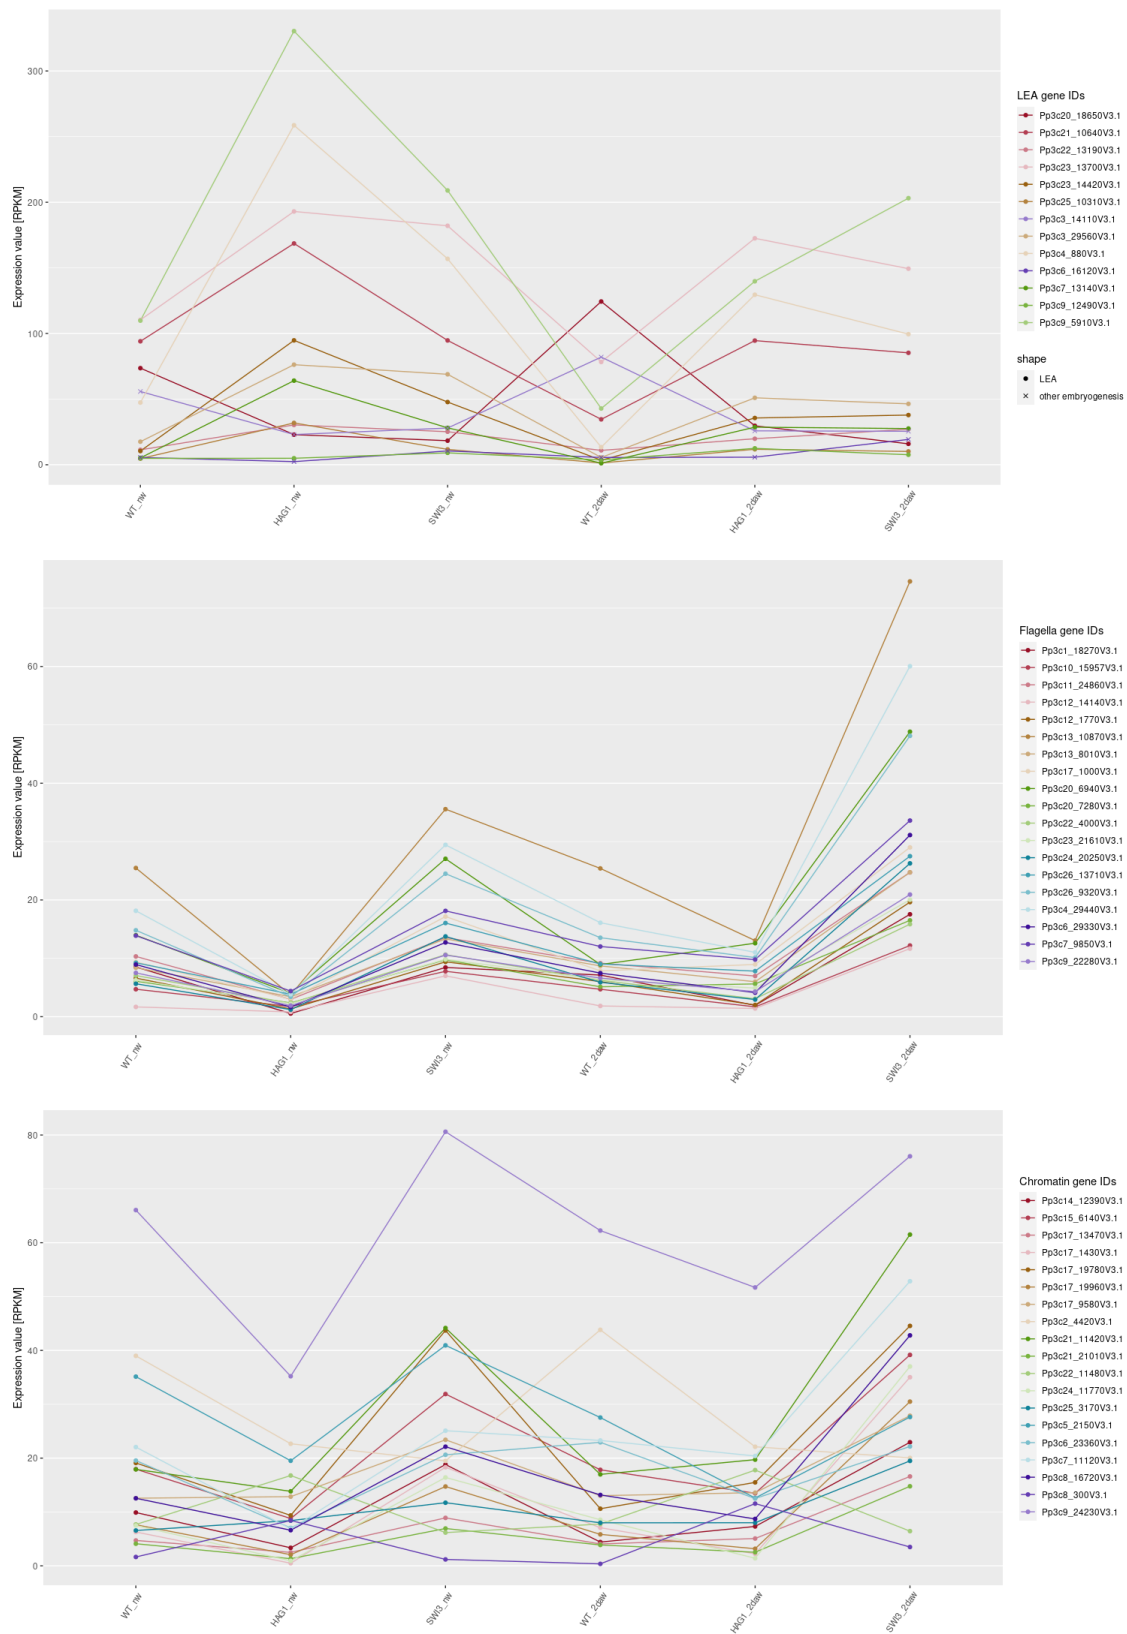

**Figure S19: Expression profile of LEA, flagella and chromatin associated DEGs.**

Genes carrying annotation terms “embryogenesis”, “flagella” or “chromatin” (Table S7) are shown. The expression [RPKM value] of each experiment is shown as the average of RNA-seq sample triplicates. Over all, the DEGs follow a uniform pattern. Embryogenesis/LEA DEGs show higher expression in the HAG1 mutants while flagella and chromatin related DEGs show higher expression in SWI3 mutants. See Results for details.

## Tables

**Table S1: Candidate gene selection analysed in terms of single copy status via Bayesian inference.**

The number of *P. patens* orthologs is depicted by the arrow colour (green=one, orange=two, red=no). The table lists information of the respective gene, e.g. *P. patens*, *A. thaliana* identifier, TAPscan family, TAIR description/GO biological process [9].

| TAP family    | <i>P. patens</i> Identifier | Bayesian inference  | TAIR10_id | Tair description/GO biological process                                                                                                                                                                                                                                                                                                                                                                                                                                                                                                                                                                                                                                                                                                                                                                                                                                                                                                                                                                                                                                                                |
|---------------|-----------------------------|---------------------|-----------|-------------------------------------------------------------------------------------------------------------------------------------------------------------------------------------------------------------------------------------------------------------------------------------------------------------------------------------------------------------------------------------------------------------------------------------------------------------------------------------------------------------------------------------------------------------------------------------------------------------------------------------------------------------------------------------------------------------------------------------------------------------------------------------------------------------------------------------------------------------------------------------------------------------------------------------------------------------------------------------------------------------------------------------------------------------------------------------------------------|
| C2H2          | Pp3c11_480V3.1              | (↑) two paralogs    | AT1G72050 | Encodes a transcriptional factor TFIIIA required for transcription of 5S rRNA gene. 5S rRNA is the smallest constituent of the ribosome. Work on one of the gene models AT1G72050.2 showed that it encodes a protein with nine Cys(2)-His(2)-type zinc fingers, a characteristic feature of TFIIIA proteins. AT1G72050.2 also contains a 23 amino acid spacer between fingers 1 and 2, a 66 amino acid spacer between fingers 4 and 5, and a 50 amino acid non-finger C-terminal tail. in vitro assay demonstrated that AT1g72050.2 binds to 5S rDNA and efficiently stimulates the transcription of 5S rRNA. AT1g72050.2 also binds to 5S rRNA in vitro. AT1g72050.2 is located at several nuclear foci including the nucleolus and is absent from the cytoplasm. multicellular organism development, regulation of transcription, DNA-templated, transcription, DNA-templated                                                                                                                                                                                                                       |
| FHA           | Pp3c12_14900V3.1            | ↑                   | AT5G47790 | SMAD/FHA domain-containing protein ; CONTAINS InterPro DOMAIN/s: SMAD/FHA domain (InterPro:IPR008984), Forkhead-associated (FHA) domain (InterPro:IPR000253); BEST Arabidopsis thaliana protein match is: SMAD/FHA domain-containing protein (TAIR:AT5G38840.1)                                                                                                                                                                                                                                                                                                                                                                                                                                                                                                                                                                                                                                                                                                                                                                                                                                       |
| GNAT          | Pp3c5_21790V3.1             | ↓ no clear ortholog | AT2G39020 | ornithine metabolic process; Although this locus shares considerable sequence similarity with the adjacent NATA1 gene (At2g39030), they appear to encode genes with different functions. NATA1 is involved in the production of N-delta-acetylornithine, but, overexpression of At2g39020 in tobacco does not lead to the formation of this defense compound. The mRNA is cell-to-cell mobile.                                                                                                                                                                                                                                                                                                                                                                                                                                                                                                                                                                                                                                                                                                        |
| GNAT          | Pp3c7_5970V3.1              | (↑) two paralogs    | AT5G13780 | embryo development ending in seed dormancy, response to water deprivation                                                                                                                                                                                                                                                                                                                                                                                                                                                                                                                                                                                                                                                                                                                                                                                                                                                                                                                                                                                                                             |
| GNAT          | Pp3c2_9560V3.1              | ↑                   | AT3G54610 | Encodes a histone acetyltransferase that is plays a role in the determination of the embryonic root-shoot axis. It is also required to regulate the floral meristem activity by modulating the extent of expression of WUS and AG. In other eukaryotes, this protein is recruited to specific promoters by DNA binding transcription factors and is thought to promote transcription by acetylating the N-terminal tail of histone H3. The enzyme has indeed been shown to catalyse primarily the acetylation of H3 histone with only traces of H4 and H2A/B being acetylated. Non-acetylated H3 peptide or an H3 peptide that had been previously acetylated on K9 both serve as excellent substrates for HAG1-catalyzed acetylation. However, prior acetylation of H3 lysine 14 blocks radioactive acetylation of the peptide by HAG1. HAG1 is specific for histone H3 lysine 14. flower development, histone acetylation, positive regulation of transcription, DNA-templated, regulation of vegetative phase change, response to light stimulus, root morphogenesis, transcription, DNA-templated |
| Jumonji_Other | Pp3c23_15970V3.1            | ↑                   | AT5G06550 | Encodes a HR demethylase that acts as a positive regulator of seed germination in the PHYB-PIL5-SOM pathway. cell surface receptor signaling pathway, histone H4-R3 methylation, positive regulation of seed germination                                                                                                                                                                                                                                                                                                                                                                                                                                                                                                                                                                                                                                                                                                                                                                                                                                                                              |

|                  |                 |                     |           |                                                                                                                                                                                                                                                                                                                                                                                                                                                                                                                                                                                                                                                                                                                                  |
|------------------|-----------------|---------------------|-----------|----------------------------------------------------------------------------------------------------------------------------------------------------------------------------------------------------------------------------------------------------------------------------------------------------------------------------------------------------------------------------------------------------------------------------------------------------------------------------------------------------------------------------------------------------------------------------------------------------------------------------------------------------------------------------------------------------------------------------------|
| Med7             | Pp3c5_20850V3.1 | (↑) two paralogs    | AT5G03500 | Mediator complex, subunit Med7; FUNCTIONS IN: RNA polymerase II transcription mediator activity; INVOLVED IN: regulation of transcription from RNA polymerase II promoter; LOCATED IN: mediator complex; CONTAINS InterPro DOMAIN/s: Mediator complex, subunit Med7 (InterPro:IPR009244); BEST Arabidopsis thaliana protein match is: Mediator complex, subunit Med7 (TAIR:AT5G03220.1)                                                                                                                                                                                                                                                                                                                                          |
| MYB-related      | Pp3c2_24980V3.1 | ↑                   | AT2G47620 | chromatin remodelling, covalent chromatin modification, multicellular organism development, regulation of transcription, DNA-templated, transcription, DNA-templated                                                                                                                                                                                                                                                                                                                                                                                                                                                                                                                                                             |
| MYB-related      | Pp3c14_5130V3.1 | (↑) two paralogs    | AT5G06110 | DnaJ domain ;Myb-like DNA-binding domain; FUNCTIONS IN: heat shock protein binding, DNA binding; INVOLVED IN: protein folding; EXPRESSED IN: 23 plant structures; EXPRESSED DURING: 13 growth stages; CONTAINS InterPro DOMAIN/s: Molecular chaperone, heat shock protein, Hsp40, DnaJ (InterPro:IPR015609), Heat shock protein DnaJ, N-terminal (InterPro:IPR001623), Heat shock protein DnaJ, conserved site (InterPro:IPR018253), MYB-like (InterPro:IPR017877), SANT, DNA-binding (InterPro:IPR001005), Myb, DNA-binding (InterPro:IPR014778), Homeodomain-like (InterPro:IPR009057); BEST Arabidopsis thaliana protein match is: DnaJ domain ;Myb-like DNA-binding domain (TAIR:AT3G11450.1) cell division, protein folding |
| SET/Sigma70-like | Pp3c14_4440V3.1 | ↑                   | AT1G64860 | DNA-templated transcription, initiation, cellular response to light stimulus, cellular response to redox state, photosystem stoichiometry adjustment, regulation of RNA biosynthetic process, regulation of transcription, DNA-templated                                                                                                                                                                                                                                                                                                                                                                                                                                                                                         |
| TUB              | Pp3c3_17070V3.1 | ↓ no clear ortholog | AT2G47900 | cellular response to osmotic stress, regulation of transcription, DNA-templated, response to fungus, response to hydrogen peroxide, response to salt stress                                                                                                                                                                                                                                                                                                                                                                                                                                                                                                                                                                      |

**Table S2: Detailed numbers of crossing analyses with a fluorescent male fertile strain to test for male impairment.**

*Ppswi3a/b* and *Pphag1* were crossed with Re-mcherry according to [10]. Shown is the number of sporophytes per gametophore (s/g) in percentage relative to the total number of gametophores, and the rate of crosses per sporophytes (c/s) in percentage relative to the total number of sporophytes. Most of the sporophytes in the Reute control derive from selfing (homozygous; hence low number of heterozygous sporophytes, c/s). In contrast, almost 100% of mutant sporophytes are heterozygous, indicating a male impairment. The cross with the male fertile strain could largely restore the phenotype in *swi3a/b* (sporophyte/gametophore ratio at least 80%), while *Pphag1* shows a significantly reduced sporophyte ratio as compared to the control. Three independent replicates were performed for the three mutant lines as well as the control. The total number of gametophores analysed was 621 (*swi3a/b*), 770 (*hag1*) and 190 (control).

| Mutant/control       | replicate 1 (%) | replicate 2 (%) | replicate 3 (%) |
|----------------------|-----------------|-----------------|-----------------|
| <b>swi3a/b_1 s/g</b> | 100.00          | 82.26           | 98.81           |
| <b>swi3a/b_1 cs</b>  | 96.05           | 100.00          | 98.80           |
| <b>swi3a/b_2 s/g</b> | 100.00          | 79.78           | 87.04           |
| <b>swi3a/b_2 cs</b>  | 100.00          | 97.18           | 100.00          |
| <b>swi3a/b_3 s/g</b> | 97.33           | 86.59           | 100.00          |
| <b>swi3a/b_3 cs</b>  | 100.00          | 94.37           | 96.49           |
| <b>hag1_1 s/g</b>    | 21.21           | 14.08           | 4.00            |
| <b>hag1_1 cs</b>     | 100.00          | 100.00          | 100.00          |
| <b>hag1_2 s/g</b>    | 60.61           | 32.89           | 57.14           |
| <b>hag1_2 cs</b>     | 100.00          | 96.00           | 100.00          |
| <b>hag1_3 s/g</b>    | 28.81           | 22.09           | 46.35           |
| <b>hag1_3 cs</b>     | 82.35           | 100.00          | 96.63           |
| <b>Reute s/g</b>     | 95.45           | 95.83           | 100.00          |
| <b>Reute cs</b>      | 3.17            | 2.90            | 3.85            |

**Table S3: see extra file describing the sources of the genome-derived protein sets used.**

**Table S4: List of PCR primers used in this study.**

| <b>name</b>             | <b>sequence (5' → 3')</b>         |
|-------------------------|-----------------------------------|
| Mapoly0187s0003_sg1_rev | AAACAGTGGATTGTGGCTCTACCC          |
| Mapoly0187s0003_sg2_rev | AAACCCGCAAACATGTCCAGCGTC          |
| M13for                  | GTAAAACGACGGCCAGT                 |
| M13rev                  | GGAAACAGCTATGACCATG               |
| Mapoly0187s0003#1       | ACGTACATGAGAGTACGAAAGCA           |
| Mapoly0187s0003#2       | ATACTCCTTTGTTCACAGATGC            |
| Mapoly0187s0003#3       | TCACGACTGCAGTACGCTC               |
| Mapoly0187s0003_sg1_for | CTCGGGGTAGAGCCACAATCCACT          |
| Mapoly0187s0003_sg2_for | CTCGGACGCTGGACATGTTTGCGG          |
| Marpo_female_fwd        | CACCATGGGCCTACTTGTTCAGTCGCTGGTGG  |
| Marpo_female_rev        | TCAAAGGCTAGTGTTCATTACTTGGAC       |
| Marpo_male_fwd          | GCAGCTGTGTTTTGTGCAGATCGTC         |
| Marpo_male_rev          | ATTCTGACCTTACAAGAAATCCTCC         |
| pJet_rev                | GCTGAGAATATTGTAGGAGATCTTCTAG      |
| pJet_uni_neu            | CAACTGCTTTAACACTTGTGCCTG          |
| Pp3c2_24980#1           | TGCTTCCAAGGAGGCGAAAC              |
| Pp3c2_24980#2           | ACTATGCAACTCCATCACTCCAGG          |
| Pp3c2_24980#3-EcoR1     | GAATTCATGGTGAACCCGGCG             |
| Pp3c2_24980#4-Xba1      | TCTAGATGAACTGGGCGCAGGG            |
| Pp3c2_9560#1            | TCCAACGGTGATTCTCGCAG              |
| Pp3c2_9560#2            | AGGTGCTCCCGAGATACG                |
| Pp3c2_9560#3            | TCGTCAGGATCCGTTCCAATG             |
| Pp3c2_9560#4-EcoR1      | GAATTCATGCGCAAGGGGGCC             |
| Pp3c2_9560#5-Sal1       | GTCGACTGACAAGTGTGTGATCTGCTGACCAAC |

**Table S5: List of sgRNAs expression cassettes used in this study.**

Promoter sequences are in blue, target sequences in red and tracrRNA sequences in green. For *M. polymorpha* tracrRNA and promoter were already implemented in the vectors ordered from Addgene.

| Name                     | Sequence (5'-3')                                                                                                                                                                                                                                                                                                                                                                                                                                                                                                                                                                                                                                             |
|--------------------------|--------------------------------------------------------------------------------------------------------------------------------------------------------------------------------------------------------------------------------------------------------------------------------------------------------------------------------------------------------------------------------------------------------------------------------------------------------------------------------------------------------------------------------------------------------------------------------------------------------------------------------------------------------------|
| Pp3c2_9560-sgRNA1        | GTCCATTGAAGCAGACGTGTTGCGACAGGTTAGCGACGATGGGTGTAGATGTGATGTGATG<br>TGATGGTGTGGTTCTTCCACGGCGGCGTCTTTCGCGGTGGCGGAGAAGGGGATATCCCGAAG<br>GAGCGGCAGCGGGAGAGCACAAGCAGAAAGGTTGCAGTGAGTGAGTGGGTCCAGCTGGGT<br>GGCTGGCCGAGTGGACGCGACCGGGTTTCGAGGGGGGGGGGAGAAAAGGGATGGAGCG<br>AGGGATATAACCCACATGGAATGGAGGTGGGTGTGAAGGCGGGTATATAGGAAGGTGGAG<br>GACTTACAACCCATgcccacaactttcaacggGTTTTAGAGCTAGAAAATAGCAAGTAAAAATAAGGC<br>TAGTCCGTTATCAACTTGAAAAAGTGGCACCGAGTCCGGTGCTTTTTTT                                                                                                                                                                                                   |
| Pp3c2_9560-sgRNA2        | GTCCATTGAAGCAGACGTGTTGCGACAGGTTAGCGACGATGGGTGTAGATGTGATGTGATG<br>TGATGGTGTGGTTCTTCCACGGCGGCGTCTTTCGCGGTGGCGGAGAAGGGGATATCCCGAAG<br>GAGCGGCAGCGGGAGAGCACAAGCAGAAAGGTTGCAGTGAGTGAGTGGGTCCAGCTGGGT<br>GGCTGGCCGAGTGGACGCGACCGGGTTTCGAGGGGGGGGGGAGAAAAGGGATGGAGCG<br>AGGGATATAACCCACATGGAATGGAGGTGGGTGTGAAGGCGGGTATATAGGAAGGTGGAG<br>GACTTACAACCCATggttcgaaggtgcgaacggGTTTTAGAGCTAGAAAATAGCAAGTAAAAATAAGGC<br>TAGTCCGTTATCAACTTGAAAAAGTGGCACCGAGTCCGGTGCTTTTTTT                                                                                                                                                                                                  |
| Pp3c2_24980-sgRNA1       | GTCCATTGAAGCAGACGTGTTGCGACAGGTTAGCGACGATGGGTGTAGATGTGATGTGATG<br>TGATGGTGTGGTTCTTCCACGGCGGCGTCTTTCGCGGTGGCGGAGAAGGGGATATCCCGAAG<br>GAGCGGCAGCGGGAGAGCACAAGCAGAAAGGTTGCAGTGAGTGAGTGGGTCCAGCTGGGT<br>GGCTGGCCGAGTGGACGCGACCGGGTTTCGAGGGGGGGGGGAGAAAAGGGATGGAGCG<br>AGGGATATAACCCACATGGAATGGAGGTGGGTGTGAAGGCGGGTATATAGGAAGGTGGAG<br>GACTTACAACCCATgcccggagccactcccgaagGTTTTAGAGCTAGAAAATAGCAAGTAAAAATAAGGC<br>CTAGTCCGTTATCAACTTGAAAAAGTGGCACCGAGTCCGGTGCTTTTTTT                                                                                                                                                                                                |
| Pp3c2_24980-sgRNA2       | GTCCATTGAAGCAGACGTGTTGCGACAGGTTAGCGACGATGGGTGTAGATGTGATGTGATG<br>TGATGGTGTGGTTCTTCCACGGCGGCGTCTTTCGCGGTGGCGGAGAAGGGGATATCCCGAAG<br>GAGCGGCAGCGGGAGAGCACAAGCAGAAAGGTTGCAGTGAGTGAGTGGGTCCAGCTGGGT<br>GGCTGGCCGAGTGGACGCGACCGGGTTTCGAGGGGGGGGGGAGAAAAGGGATGGAGCG<br>AGGGATATAACCCACATGGAATGGAGGTGGGTGTGAAGGCGGGTATATAGGAAGGTGGAG<br>GACTTACAACCCATgcaactccagagctcgcaccGTTTTAGAGCTAGAAAATAGCAAGTAAAAATAAGGC<br>CTAGTCCGTTATCAACTTGAAAAAGTGGCACCGAGTCCGGTGCTTTTTTT                                                                                                                                                                                                |
| Mapoly0187s0003.1_sgRNA1 | CTACTACACTCCTCAACGCAAGTTCTATCTCATATCTCTGCAAGAGCTTATTCCAAGAAACT<br>TTCTTGTGCTTCTATGCATGCCAGGTACCTTAAGTCGCGCGCATAGTCACCTTCACAGCCTTT<br>TCAGTTCTCCCTTTGATGGCTCAGAGTGACGCAACTGCACAAAAATAAGAAAAAAGTCGAA<br>GCGTACGAGAGATGTATCCGGCTAGTTTCTTGGAGTTCGGATTGCTCTCTTTCTCTGTCTC<br>CCCGAACCATATGGAATTTATGAACTGCTGTTCACTAGTCAGTCACTTGTTCAGAACTTTT<br>GAGTGGTCGATTTATCCACCTTCTTGTTCCTGGGTCCAGAATCTGACTTCTTGAGACAA<br>CAAACAGTGCACAGTGGATCGAAGAATGACCACAGTTGAGACACGTGGCGCTGGCCTCATT<br>TATTGCACCATACGTTTGTGAAGAAGTGAATAATGGTGGATATAAAGCAGAGTTGCACCC<br>AGCCTCTggtagagccacaactccactGTTTTAGAGCTAGAAAATAGCAAGTAAAAATAAGGCTAGTCC<br>GTTATCAACTTGAAAAAGTGGCACCGAGTCCGGTGCTTTTTTT |
| Mapoly0187s0003.1_sgRNA2 | CTACTACACTCCTCAACGCAAGTTCTATCTCATATCTCTGCAAGAGCTTATTCCAAGAAACT<br>TTCTTGTGCTTCTATGCATGCCAGGTACCTTAAGTCGCGCGCATAGTCACCTTCACAGCCTTT<br>TCAGTTCTCCCTTTGATGGCTCAGAGTGACGCAACTGCACAAAAATAAGAAAAAAGTCGAA<br>GCGTACGAGAGATGTATCCGGCTAGTTTCTTGGAGTTCGGATTGCTCTCTTTCTCTGTCTC<br>CCCGAACCATATGGAATTTATGAACTGCTGTTCACTAGTCAGTCACTTGTTCAGAACTTTT<br>GAGTGGTCGATTTATCCACCTTCTTGTTCCTGGGTCCAGAATCTGACTTCTTGAGACAA<br>CAAACAGTGCACAGTGGATCGAAGAATGACCACAGTTGAGACACGTGGCGCTGGCCTCATT<br>TATTGCACCATACGTTTGTGAAGAAGTGAATAATGGTGGATATAAAGCAGAGTTGCACCC<br>AGCCTCTgacgctggacatgtttcggGTTTTAGAGCTAGAAAATAGCAAGTAAAAATAAGGCTAGTCCG<br>TTATCAACTTGAAAAAGTGGCACCGAGTCCGGTGCTTTTTTT  |

**Table S6: Detailed numbers of gametangiophore development analyses for *Marchantia polymorpha*.**

Three independent replicates (three ECO2 boxes with two plants respectively) were analysed with regard to the mutant lines as well as the wild type (WT; m=male, f=female). The mutant lines were numbered consecutively.

| Lines          | Replicate 1 |         | Replicate 2 |         | Replicate 3 |         |
|----------------|-------------|---------|-------------|---------|-------------|---------|
|                | Plant 1     | Plant 2 | Plant 1     | Plant 2 | Plant 1     | Plant 2 |
| <i>hag1_1</i>  | 0           | 0       | 4           | 2       | 0           | 0       |
| <i>hag1_2</i>  | 0           | 0       | 0           | 1       | 0           | 0       |
| <i>hag1_3</i>  | 0           | 1       | 0           | 0       | 0           | 0       |
| <i>hag1_4</i>  | 0           | 0       | 0           | 1       | 0           | 0       |
| <i>hag1_5</i>  | 0           | 0       | 0           | 0       | 0           | 0       |
| <i>hag1_6</i>  | 0           | 0       | 6           | 0       | 12          | 2       |
| <i>hag1_7</i>  | 0           | 0       | 0           | 1       | 0           | 0       |
| <i>hag1_8</i>  | 4           | 3       | 25          | 4       | 0           | 0       |
| <i>hag1_9</i>  | 2           | 1       | 0           | 1       | 0           | 1       |
| <i>hag1_10</i> | 0           | 0       | 1           | 0       | 0           | 0       |
| WT_m           | 32          | 32      | 20          | 21      | 49          | 40      |
| WT_f           | 40          | 38      | 38          | 50      | 43          | 34      |

**Table S7: DEGs annotated as related to embryogenesis (blue; yellow: LEA), chromatin (orange) and flagella (green).**

| gene_id_v3.3     | GO_annot_BP                          | GO_annot_MF                            | TAIR_desc                        | Unigene reviewed_desc                                       | Unigene gene annotation                        | cosmos_genomaut_description                                                                                                                                                                                                                                                | cosmos_genomaut_annot                                                                                                                                                                                                                                                      |
|------------------|--------------------------------------|----------------------------------------|----------------------------------|-------------------------------------------------------------|------------------------------------------------|----------------------------------------------------------------------------------------------------------------------------------------------------------------------------------------------------------------------------------------------------------------------------|----------------------------------------------------------------------------------------------------------------------------------------------------------------------------------------------------------------------------------------------------------------------------|
| Pp3c1_15270v3.1  |                                      |                                        |                                  |                                                             |                                                | PREDICTED: ciliated domain-containing protein 147 [Ciona intestinalis]                                                                                                                                                                                                     |                                                                                                                                                                                                                                                                            |
| Pp3c11_15957v3.1 |                                      |                                        |                                  |                                                             |                                                | PREDICTED: cilia- and flagella-associated protein 57-like isoform X1 [Aplysia californica]                                                                                                                                                                                 |                                                                                                                                                                                                                                                                            |
| Pp3c11_24860v3.1 | protein phosphorylation              | protein kinase superfamily protein     | MAPK/MAKMKRK overtopping k       | PREDICTED: MAPK/MAKMKRK overtopping k                       |                                                | long flagella protein 16                                                                                                                                                                                                                                                   | long flagella protein 16                                                                                                                                                                                                                                                   |
| Pp3c12_14140v3.1 | anatomical structure morphogenesis   | cell projection organization           | single-organism development      | intraflagellar transport protein 81                         | PREDICTED: intraflagellar transport protein 81 | estrogen-related receptor beta like 1                                                                                                                                                                                                                                      | estrogen-related receptor beta like 1                                                                                                                                                                                                                                      |
| Pp3c12_1770v3.1  |                                      |                                        |                                  |                                                             |                                                | EF-hand domain-containing protein                                                                                                                                                                                                                                          | EF-hand domain-containing protein                                                                                                                                                                                                                                          |
| Pp3c13_10870v3.1 |                                      |                                        |                                  |                                                             |                                                | 13 kDa desflagellin-inducible protein                                                                                                                                                                                                                                      | 13 kDa desflagellin-inducible protein                                                                                                                                                                                                                                      |
| Pp3c13_8010v3.1  |                                      |                                        |                                  |                                                             |                                                | radial spoke protein 3                                                                                                                                                                                                                                                     | radial spoke protein 3                                                                                                                                                                                                                                                     |
| Pp3c14_12390v3.1 | hichome morphogenesis                | anther                                 | sequence-specific DNA binding    | sequence-specific DNA binding transcription factor activity | chiron                                         | transcription repressor MYB4 [Vitis v. MDA7.17; myb family transcription factor]                                                                                                                                                                                           | MDA7.17; myb family transcription factor                                                                                                                                                                                                                                   |
| Pp3c15_8140v3.1  | metabolic process                    | helicase activity                      | DNA binding                      | A                                                           | Encodes a SWISWIF nuclease                     | PREDICTED: chromodomain-helicase-chromodomain-helicase-dna-binding protein:SNF2 family chromodomain-helicase-chromodomain-helicase-dna-binding protein                                                                                                                     | chromodomain-helicase-dna-binding protein                                                                                                                                                                                                                                  |
| Pp3c17_1000v3.1  |                                      |                                        |                                  |                                                             |                                                | hypothetical protein AMTR_s0000900107000 [Amborella trichopoda]                                                                                                                                                                                                            |                                                                                                                                                                                                                                                                            |
| Pp3c17_13470v3.1 |                                      |                                        |                                  |                                                             |                                                | hypothetical protein M569_04726 [G] hydroxyproline-rich glycoprotein family protein                                                                                                                                                                                        | hydroxyproline-rich glycoprotein family protein                                                                                                                                                                                                                            |
| Pp3c17_1430v3.1  |                                      |                                        |                                  |                                                             |                                                | PREDICTED: uncharacterized protein F14C21.44; late embryogenesis abundant protein-related / LEA protein-related                                                                                                                                                            | F14C21.44; late embryogenesis abundant protein-related / LEA protein-related                                                                                                                                                                                               |
| Pp3c17_10780v3.1 | hichome morphogenesis                | anther                                 | sequence-specific DNA binding    | sequence-specific DNA binding transcription factor activity | chlor                                          | PREDICTED: myb-related protein 31 MDA7.17; myb family transcription factor                                                                                                                                                                                                 | MDA7.17; myb family transcription factor                                                                                                                                                                                                                                   |
| Pp3c17_19960v3.1 |                                      |                                        |                                  |                                                             |                                                | hypothetical protein SELMODRAFT_dynamin like protein                                                                                                                                                                                                                       | dynamin like protein                                                                                                                                                                                                                                                       |
| Pp3c17_9850v3.1  | nucleolus organization               | methyl GTP binding                     | GTPase activity                  |                                                             |                                                | PREDICTED: uncharacterized protein F14C21.44; late embryogenesis abundant protein-related / LEA protein-related                                                                                                                                                            | F14C21.44; late embryogenesis abundant protein-related / LEA protein-related                                                                                                                                                                                               |
| Pp3c2_4400v3.1   |                                      |                                        |                                  |                                                             |                                                | hypothetical protein H57_07862 [Ac] repeat domain 65                                                                                                                                                                                                                       |                                                                                                                                                                                                                                                                            |
| Pp3c20_18650v3.1 |                                      |                                        |                                  |                                                             |                                                | PREDICTED: uncharacterized protein F14C21.44; late embryogenesis abundant protein-related / LEA protein-related                                                                                                                                                            | F14C21.44; late embryogenesis abundant protein-related / LEA protein-related                                                                                                                                                                                               |
| Pp3c20_8940v3.1  |                                      |                                        |                                  |                                                             |                                                | hypothetical protein H57_07862 [Ac] repeat domain 65                                                                                                                                                                                                                       |                                                                                                                                                                                                                                                                            |
| Pp3c20_7290v3.1  |                                      |                                        |                                  |                                                             |                                                | PREDICTED: uncharacterized protein F14C21.44; late embryogenesis abundant protein-related / LEA protein-related                                                                                                                                                            | F14C21.44; late embryogenesis abundant protein-related / LEA protein-related                                                                                                                                                                                               |
| Pp3c21_10640v3.1 |                                      |                                        |                                  |                                                             |                                                | late embryogenesis abundant hydroxyproline-rich glycoprotein [Medicago truncatula]                                                                                                                                                                                         | late embryogenesis abundant hydroxyproline-rich glycoprotein [Medicago truncatula]                                                                                                                                                                                         |
| Pp3c21_11420v3.1 | anatomical structure morphogenesis   | flower development                     | single-organism cellular process | cellul                                                      | Actin-related protein 4                        | PREDICTED: actin-related protein 7 actin                                                                                                                                                                                                                                   | actin                                                                                                                                                                                                                                                                      |
| Pp3c21_21010v3.1 |                                      |                                        |                                  |                                                             |                                                | PREDICTED: uncharacterized protein F14C21.44; late embryogenesis abundant protein-related / LEA protein-related                                                                                                                                                            | F14C21.44; late embryogenesis abundant protein-related / LEA protein-related                                                                                                                                                                                               |
| Pp3c22_11480v3.1 | multidimensional cell growth         | trich                                  | actin binding                    | Encodes a WD40 repeat cell                                  | Probable histone-binding protein               | WD repeat 2 [Vitis vinifera]                                                                                                                                                                                                                                               | F13823.16; flower pigmentation protein (AN11) [Arabidopsis thaliana]                                                                                                                                                                                                       |
| Pp3c22_13190v3.1 | response to desiccation              |                                        |                                  |                                                             |                                                | PREDICTED: actin-related protein 3; actin-like protein                                                                                                                                                                                                                     | actin-like protein                                                                                                                                                                                                                                                         |
| Pp3c22_4000v3.1  |                                      |                                        |                                  |                                                             |                                                | late embryogenesis abundant protein; putative / LEA protein                                                                                                                                                                                                                | late embryogenesis abundant protein                                                                                                                                                                                                                                        |
| Pp3c23_13700v3.1 |                                      |                                        |                                  |                                                             |                                                | late embryogenesis abundant protein; putative / LEA protein                                                                                                                                                                                                                | late embryogenesis abundant protein                                                                                                                                                                                                                                        |
| Pp3c23_14420v3.1 |                                      |                                        |                                  |                                                             |                                                | protein belonging to late embryogenesis abundant (LEA) protein in group 3 that might be involved in maturation and desiccation tolerance of seeds. RFLP and CAPS mapping place it on chromosome 4 but the nucleotide sequence is identical to that of a protein in group 4 | protein belonging to late embryogenesis abundant (LEA) protein in group 3 that might be involved in maturation and desiccation tolerance of seeds. RFLP and CAPS mapping place it on chromosome 4 but the nucleotide sequence is identical to that of a protein in group 4 |
| Pp3c23_21810v3.1 |                                      |                                        |                                  |                                                             |                                                | Desflagellin-inducible protein 13 kDa                                                                                                                                                                                                                                      | Desflagellin-inducible protein 13 kDa                                                                                                                                                                                                                                      |
| Pp3c24_11770v3.1 | protein folding                      | response to heat                       | DNA binding                      | chromatin binding                                           | Member of the R2R3 factor gene                 | Transcription factor MYB57                                                                                                                                                                                                                                                 | PREDICTED: myb-related protein M1_r2r3-myb transcription                                                                                                                                                                                                                   |
| Pp3c24_20250v3.1 |                                      |                                        |                                  |                                                             |                                                | hypothetical protein SELMODRAFT_dynamin like protein                                                                                                                                                                                                                       | dynamin like protein                                                                                                                                                                                                                                                       |
| Pp3c25_10310v3.1 |                                      |                                        |                                  |                                                             |                                                | hypothetical protein SELMODRAFT_dynamin like protein                                                                                                                                                                                                                       | dynamin like protein                                                                                                                                                                                                                                                       |
| Pp3c25_3170v3.1  |                                      |                                        |                                  |                                                             |                                                | hypothetical protein SELMODRAFT_dynamin like protein                                                                                                                                                                                                                       | dynamin like protein                                                                                                                                                                                                                                                       |
| Pp3c26_13710v3.1 | CTP biosynthetic process             | nucleoside diphosphate kinase activity | ATP binding                      |                                                             |                                                | Nucleoside diphosphate kinase                                                                                                                                                                                                                                              | Nucleoside diphosphate kinase                                                                                                                                                                                                                                              |
| Pp3c26_3020v3.1  | single-organism cellular process     |                                        |                                  |                                                             |                                                | intraflagellar transport protein 81                                                                                                                                                                                                                                        | intraflagellar transport protein 81                                                                                                                                                                                                                                        |
| Pp3c3_14110v3.1  | protein phosphorylation              | ATP binding                            | protein serine/threonine         | NSP-interacting kinase 2 [NIK2]                             | Protein NSP-interacting kinase 2 [NIK2]        | PREDICTED: somatic embryogenesis                                                                                                                                                                                                                                           | brassinosteroid insensitive 1-associated receptor kinase 1                                                                                                                                                                                                                 |
| Pp3c3_26500v3.1  |                                      |                                        |                                  |                                                             |                                                | hypothetical protein, variant [Sagittaria dictyna V.S20]                                                                                                                                                                                                                   |                                                                                                                                                                                                                                                                            |
| Pp3c4_29400v3.1  |                                      |                                        |                                  |                                                             |                                                | hypothetical protein CAP2/DRAFT_170918 [Capitata telea]                                                                                                                                                                                                                    |                                                                                                                                                                                                                                                                            |
| Pp3c4_880v3.1    |                                      |                                        |                                  |                                                             |                                                | late embryogenesis abundant protein; late embryogenesis abundant protein; late embryogenesis abundant protein, group 3 (LEA) (PMA2005) [Triticum aestivum]                                                                                                                 | late embryogenesis abundant protein; late embryogenesis abundant protein; late embryogenesis abundant protein, group 3 (LEA) (PMA2005) [Triticum aestivum]                                                                                                                 |
| Pp3c5_2150v3.1   |                                      |                                        |                                  |                                                             |                                                | putative R2R3 MYB protein 5 [Arachis hypogaea transcription factor-like protein]                                                                                                                                                                                           | myb transcription factor-like protein                                                                                                                                                                                                                                      |
| Pp3c8_18120v3.1  | AMP salvage                          | AMP deaminase activity                 |                                  | Encodes a protein with 7n viral                             | AMP deaminase                                  | putative R2R3 MYB protein 5 [Arachis hypogaea transcription factor-like protein]                                                                                                                                                                                           | myb transcription factor-like protein                                                                                                                                                                                                                                      |
| Pp3c8_23360v3.1  |                                      |                                        |                                  |                                                             |                                                | PREDICTED: AMP deaminase-like [Cicer arietinum]                                                                                                                                                                                                                            |                                                                                                                                                                                                                                                                            |
| Pp3c8_2630v3.1   |                                      |                                        |                                  |                                                             |                                                | Uncharacterized protein C4or2                                                                                                                                                                                                                                              | Uncharacterized protein C4or2                                                                                                                                                                                                                                              |
| Pp3c7_11120v3.1  |                                      |                                        |                                  |                                                             |                                                | PREDICTED: protein REVEILLE 7 [Elymus domain-containing protein]                                                                                                                                                                                                           |                                                                                                                                                                                                                                                                            |
| Pp3c7_13140v3.1  |                                      |                                        |                                  |                                                             |                                                | PREDICTED: protein REVEILLE 7 [Elymus domain-containing protein]                                                                                                                                                                                                           |                                                                                                                                                                                                                                                                            |
| Pp3c7_13420v3.1  | single-organism cellular process     | tubulin N-acetyltransferase activity   |                                  |                                                             |                                                | hypothetical protein SELMODRAFT_64748, partial [Salicornia mollendorffii]                                                                                                                                                                                                  |                                                                                                                                                                                                                                                                            |
| Pp3c7_7130v3.1   | positive regulation of cell motility | sequence-specific DNA binding          | transcription factor activity    |                                                             |                                                | Alpha-tubulin N-acetyltransferase [microtubule] [Dytricha triflorae]                                                                                                                                                                                                       |                                                                                                                                                                                                                                                                            |
| Pp3c8_10720v3.1  | intracellular transport              |                                        |                                  |                                                             |                                                | UF3468 protein [Phytophthora parasitica INRA-319]                                                                                                                                                                                                                          |                                                                                                                                                                                                                                                                            |
| Pp3c8_300v3.1    | protein folding                      | response to heat                       | DNA binding                      | chromatin binding                                           | heat shock protein binding                     | ATP binding/unfolded protein binding                                                                                                                                                                                                                                       | OS.NB3a0069H10.16 [Oryza sativa japonica Group]                                                                                                                                                                                                                            |
| Pp3c9_12490v3.1  |                                      |                                        |                                  |                                                             |                                                | late embryogenesis abundant (LEA) hydroxyproline-rich glycoprotein [Glycine max.]                                                                                                                                                                                          | late embryogenesis abundant (LEA) hydroxyproline-rich glycoprotein [Glycine max.]                                                                                                                                                                                          |
| Pp3c9_2280v3.1   |                                      |                                        |                                  |                                                             |                                                | Encodes a putative TATA bind; Spem-associated antigen 16 [p]                                                                                                                                                                                                               | PREDICTED: spermiin-associated anti-Flagellar and repeat protein p20                                                                                                                                                                                                       |
| Pp3c9_24230v3.1  | sugar mediated signaling pathw       | structural constituent of cytosk       |                                  | Encodes a gene similar to actin                             | Actin-related protein 4                        | PREDICTED: actin-related protein 4; actin related protein                                                                                                                                                                                                                  | actin related protein                                                                                                                                                                                                                                                      |
| Pp3c9_5810v3.1   |                                      |                                        |                                  |                                                             |                                                | MUL TSP/ECES: hypothetical protein [Haemophilus]                                                                                                                                                                                                                           |                                                                                                                                                                                                                                                                            |
| Pp3c9_8530v3.1   |                                      |                                        |                                  |                                                             |                                                | late embryogenesis abundant protein                                                                                                                                                                                                                                        | late embryogenesis abundant protein                                                                                                                                                                                                                                        |
| Pp3c9_30v3.1     |                                      |                                        |                                  |                                                             |                                                | hypothetical protein SELMODRAFT_F14C21.44; late embryogenesis abundant protein-related / LEA protein-related F14C21.44; late embryogenesis abundant protein-related / LEA protein-related                                                                                  | F14C21.44; late embryogenesis abundant protein-related / LEA protein-related F14C21.44; late embryogenesis abundant protein-related / LEA protein-related                                                                                                                  |



## References

1. Lechner M, Findeiss S, Steiner L, Marz M, Stadler PF, Prohaska SJ: **Proteinortho: detection of (co-)orthologs in large-scale analysis.** *BMC Bioinformatics* 2011, **12**:124.
2. Wilhelmsson PKI, Muhlich C, Ullrich KK, Rensing SA: **Comprehensive Genome-Wide Classification Reveals That Many Plant-Specific Transcription Factors Evolved in Streptophyte Algae.** *Genome Biol Evol* 2017, **9**(12):3384-3397.
3. Frickenhaus S, Beszteri B: **Quicktree-SD, Software developed by AWI-Bioinformatics.** In.; 2008.
4. Fernandez-Pozo N, Haas FB, Meyberg R, Ullrich KK, Hiss M, Perroud PF, Hanke S, Kratz V, Powell AF, Vesty EF *et al*: **PEATmoss (Physcomitrella Expression Atlas Tool): a unified gene expression atlas for the model plant Physcomitrella patens.** *Plant J* 2019.
5. Meyberg R, Perroud PF, Haas FB, Schneider L, Heimerl T, Renzaglia KS, Rensing SA: **Characterization of evolutionarily conserved key players affecting eukaryotic flagellar motility and fertility using a moss model.** *New Phytol* 2020.
6. Ortiz-Ramirez C, Hernandez-Coronado M, Thamm A, Catarino B, Wang M, Dolan L, Feijo JA, Becker JD: **A transcriptome atlas of Physcomitrella patens provides insights into the evolution and development of land plants.** *Mol Plant* 2015, **9**:205-220.
7. Perroud PF, Haas FB, Hiss M, Ullrich KK, Alboresi A, Amirebrahimi M, Barry K, Bassi R, Bonhomme S, Chen H *et al*: **The Physcomitrella patens gene atlas project: large-scale RNA-seq based expression data.** *Plant J* 2018, **95**(1):168-182.
8. Shimamura M: **Marchantia polymorpha : Taxonomy, Phylogeny and Morphology of a Model System.** *Plant and Cell Physiology* 2015, **57**(2):230-256.
9. Lang D, Ullrich KK, Murat F, Fuchs J, Jenkins J, Haas FB, Piednoel M, Gundlach H, Van Bel M, Meyberg R *et al*: **The Physcomitrella patens chromosome-scale assembly reveals moss genome structure and evolution.** *Plant J* 2018, **93**(3):515-533.
10. Perroud PF, Meyberg R, Rensing SA: **Physcomitrella patens Reute mCherry as a tool for efficient crossing within and between ecotypes.** *Plant Biol (Stuttg)* 2019, **21 Suppl 1**:143-149.
