# Supplementary material for: HAG1 and SWI3A/B control of male germ line development in P. patens suggests conservation of epigenetic reproductive control across land plants
Source: Plant Reprod. 2021 Apr 11;34(2):149–73. doi: 10.1007/s00497-021-00409-0 (PMC8128824; doi:10.1007/s00497-021-00409-0)
Supplement: Supplementary file 2 — Supplementary file2 (XLSX 10991 kb) [file 497_2021_409_MOESM2_ESM.xlsx]

## Sheet: GOA_v3.3
P. patens gene annotation table (Perroud et al., 2018, Plant J.) with additional expression data and DEGs																																									First experiment is reference
Physcomitrella patens v3.3 annotation							functional annotation by Rensing lab
27520 (79%) w/ annotation	16975 (48%) w/o GO/TAIR/Uniprot annotation	id lookup by Daniel Lang and Rensing lab		7320 (21%) w/o any annotation	16394 (47%) w/ GO	id lookup by JGI	GO annotation						BLAST annotation (query coverage 50%, subject coverage 50%, homology filtering Rost et al. (1999)				see left		see left	cosmoss v1.6 annotation			RPKM																		DEGs
34840	30250	25199	1980	19280	19355	18892	13699	13639	8988				4704		6370		22658		26754	17002	14799	16322	25235	24978	25387	25287	24485	25319	25639	25522	25664	25559	25355	25762	25548	25446	25497	25443	25189	25687	28	216	685	1040	14	648	824	2	323
gene_id_v3.3	gene_id_v3.1	unique ↓ gene_id_v1.6 mulit matches ↓		gene_id_v1.2	PHYPA_gene_id	gene_id_v3.0	GO_term_BP	GO_term_MF	GO_term_CC	GO_annot_BP	GO_annot_MF	GO_annot_CC	TAIR_id	TAIR_desc	uniprot_reviewed_id	uniprot__reviewed_desc	ncbi_nr_id_first_not_pp	ncbi_nr_desc_first_not_pp	genomezoo_1kp_first_not_pp	cosmoss_genonaut_description	cosmoss_genonaut_annot	cosmoss_genonaut_map	HAG1_23.2	HAG1_23.1	HAG1_23	HAG1_21.2	HAG1_21.1	HAG1_21	SWI3_23.2	SWI3_23.1	SWI3_23	SWI3_21.2	SWI3_21.1	SWI3_21	WT_23.2	WT_23.1	WT_23	WT_21.2	WT_21.1	WT_21	WT_21_vs_WT_23	WT_21_vs_SWI3_21	WT_23_vs_HAG1_23	WT_23_vs_SWI3_23	HAG1_23_vs_HAG1_21	SWI3_21_vs_HAG1_21	SWI3_23_vs_HAG1_23	SWI3_23_vs_SWI3_21	WT_21_vs_HAG1_21
Pp3c1_10000V3.1	Pp3c1_10000V1.1	Pp1s139_2V6.1		Pp1s139_2V2.1	Phypa_189945	Phpat.001G040700	0015936:0055114:0008299	0004420:0050661	0016021:0031966:0005789:0042170	coenzyme A metabolic process:oxidation-reduction process:isoprenoid biosynthetic process	hydroxymethylglutaryl-CoA reductase (NADPH) activity:NADP binding	integral component of membrane:mitochondrial membrane:endoplasmic reticulum membrane:plastid membrane					gi|743859905|ref|XP_011030717.1|	PREDICTED: 3-hydroxy-3-methylglutaryl-coenzyme A reductase 3-like [Populus euphratica].	TIMAUtr_onekp_ZQRI_15119	3-hydroxy-3-methylglutaryl coenzyme a reductase	3-hydroxy-3-methylglutaryl coenzyme a reductase	GO:0004420, GO:0008299, GO:0015936, GO:0016020, GO:0016021, GO:0050661, GO:0055114	9.96563	12.3768	10.883	10.6484	7.91026	9.38405	18.8195	14.7566	16.3577	15.5958	13.5363	15.8121	13.6012	15.7597	15.266	13.7487	12.0211	14.5985
Pp3c1_1000V3.1	Pp3c1_1000V1.1	Pp1s200_100V6.1;Pp1s200_101V6.1		Pp1s200_101V2.1	Phypa_143240	Phpat.001G004900	0045893:0035304:0010207:0009902:0009965:0006417:0030154:0042793:0006364:0010027		0009507:0009508	positive regulation of transcription, DNA-templated:regulation of protein dephosphorylation:photosystem II assembly:chloroplast relocation:leaf morphogenesis:regulation of translation:cell differentiation:transcription from plastid promoter:rRNA processing:thylakoid membrane organization		chloroplast:plastid chromosome					gi|297850594|ref|XP_002893178.1|	na	PHYSPtr_m240lflr_YEPO_scaffold-YEPO-2080662-cf._Physcomicromitrium_sp._1	PREDICTED: hypothetical protein [Vitis vinifera]	PREDICTED: hypothetical protein [Vitis vinifera]	GO:0009536	7.60954	8.54179	11.516	6.46434	12.4963	8.5479	6.32728	5.16027	6.83986	5.44568	5.02065	7.68437	7.07245	10.1833	10.5254	7.13456	8.23881	6.82125
Pp3c1_10010V3.1	Pp3c1_10010V1.1	Pp1s139_3V6.1		Pp1s139_3V2.1	Phypa_137714	Phpat.001G040800	0018106:0009658:0007005:0006424:0048481:0010105	0005515:0000155:0046872:0004674:0009927:0051740:0000049:0004818:0000156:0005524	0005789:0009570:0016021:0005739	peptidyl-histidine phosphorylation:chloroplast organization:mitochondrion organization:glutamyl-tRNA aminoacylation:ovule development:negative regulation of ethylene-activated signaling pathway	protein binding:phosphorelay sensor kinase activity:metal ion binding:protein serine/threonine kinase activity:histidine phosphotransfer kinase activity:ethylene binding:tRNA binding:glutamate-tRNA ligase activity:phosphorelay response regulator activity:ATP binding	endoplasmic reticulum membrane:chloroplast stroma:integral component of membrane:mitochondrion			sp|Q0BZ24|SYE2_HYPNA	Glutamate--tRNA ligase 2	gi|727541659|ref|XP_010444331.1|	PREDICTED: glutamate--tRNA ligase, chloroplastic/mitochondrial-like [Camelina sativa].	PHYSPtr_m240lflr_YEPO_scaffold-YEPO-2007017-cf._Physcomicromitrium_sp._2	glutamyl-trna synthetase	glutamyl-trna synthetase	GO:0004818, GO:0005524, GO:0005739, GO:0006424, GO:0009536	11.3408	11.5098	14.7247	14.5031	19.7247	17.8758	9.07381	7.77893	10.0273	11.3091	8.17538	11.2552	14.8096	14.0102	16.8433	11.7624	17.9761	13.269
Pp3c1_10040V3.1	Pp3c1_10040V1.1	Pp1s139_5V6.1		Pp1s139_5V2.1	Phypa_137685	Phpat.001G040900	0009845:0010564:0009933:0009909:0009640:0006626:0051301:0010228:0016567:0019915:0050826:0048366:0010182:0009793		5829	seed germination:regulation of cell cycle process:meristem structural organization:regulation of flower development:photomorphogenesis:protein targeting to mitochondrion:cell division:vegetative to reproductive phase transition of meristem:protein ubiquitination:lipid storage:response to freezing:leaf development:sugar mediated signaling pathway:embryo development ending in seed dormancy		cytosol					gi|590720582|ref|XP_007051369.1|	Ribosomal RNA processing Brix domain protein isoform 1 [Theobroma cacao].	PHYSPtr_m240lflr_YEPO_scaffold-YEPO-2080506-cf._Physcomicromitrium_sp._6_rc	rna processing factor 1	rna processing factor 1	GO:0003676, GO:0044424	14.8258	24.2276	24.0828	17.6479	20.0379	19.9034	14.1901	13.0197	18.5615	14.9699	15.2985	16.7285	23.0456	22.1771	24.3831	17.5627	18.7693	19.1144
Pp3c1_10050V3.1	Pp3c1_10050V1.1	Pp1s139_6V6.1				Phpat.001G041000											gi|847099634|ref|XP_012812303.1|	PREDICTED: S-formylglutathione hydrolase isoform X1 [Xenopus (Silurana) tropicalis].		esterase d	esterase d	GO:0004091, GO:0016023, GO:0018738	2.15449	1.64391	2.05199	1.14798	1.05847	1.39461	1.00991	0.265641	1.20408	0.586908	0.644904	0.770827	0.848923	0.770157	0.529699	0.350549	0.640192	1.44125
Pp3c1_10060V3.1	Pp3c1_10060V1.1	Pp1s139_7V6.1		Pp1s139_7V2.1	Phypa_167201	Phpat.001G041100	51260			protein homooligomerization							gi|595819457|ref|XP_007204503.1|	hypothetical protein PRUPE_ppa019306mg [Prunus persica].	FUNHY15tr_m240lflr_TR40577_c0_g1_i4_4	potassium channel tetramerization domain-containing	potassium channel tetramerization domain-containing	GO:0005249, GO:0005515, GO:0005739, GO:0006813, GO:0008076	3.08566	1.9204	2.39289	1.58945	2.77722	1.57183	3.48978	3.23743	3.44835	2.80379	2.67007	1.87468	2.63239	2.04128	2.55861	1.95376	1.56995	2.64187
Pp3c1_10080V3.1	Pp3c1_10080V1.1	Pp1s139_9V6.1		Pp1s139_9V2.1	Phypa_189957	Phpat.001G041200	0045893:0035304:0010207:0009902:1901962:0042793:0006364:0006839:0010027	95	0005743:0016021:0031969	positive regulation of transcription, DNA-templated:regulation of protein dephosphorylation:photosystem II assembly:chloroplast relocation:S-adenosyl-L-methionine transmembrane transport:transcription from plastid promoter:rRNA processing:mitochondrial transport:thylakoid membrane organization	S-adenosyl-L-methionine transmembrane transporter activity	mitochondrial inner membrane:integral component of membrane:chloroplast membrane					gi|302784230|ref|XP_002973887.1|	hypothetical protein SELMODRAFT_100740, partial [Selaginella moellendorffii].	FUNHY15tr_m240lflr_TR34515_c0_g1_i5_2_rc	mitochondrial carrier	mitochondrial carrier	GO:0000095, GO:0005488, GO:0005739, GO:0005743, GO:0006839, GO:0009507, GO:0009658, GO:0015805, GO:0016020, GO:0055085	5.7957	7.10245	8.33806	5.95503	6.95307	7.16557	5.36889	4.24407	5.18967	5.32047	4.54014	5.74765	5.65269	3.61049	4.738	4.17088	3.55001	4.83772
Pp3c1_10090V3.1	Pp3c1_10090V1.1	Pp1s139_10V6.1		Pp1s139_10V2.1	Phypa_137677	Phpat.001G041300	0055114:0045017:0005975:0009627:0006650:0046168:0048653:0008654	0051287:0004367	0009331:0009941	oxidation-reduction process:glycerolipid biosynthetic process:carbohydrate metabolic process:systemic acquired resistance:glycerophospholipid metabolic process:glycerol-3-phosphate catabolic process:anther development:phospholipid biosynthetic process	NAD binding:glycerol-3-phosphate dehydrogenase [NAD+] activity	glycerol-3-phosphate dehydrogenase complex:chloroplast envelope	ARATHwo_AT2G40690.1	Encodes a putative dihydroxyacetone phosphate (DHAP) reductase involved in glycerol-3-phosphate supply within the chloroplast for synthesis of glycerolipids. Mutants have reduced levels of hexadecatrienoic acid, which is rescued by exogenous glycerol-3-phosphate. This gene appears to be involved in the flux of fatty acids in the prokaryotic glyerolipid biosynthesis pathway.	sp|Q949Q0|GPDA2_ARATH	Glycerol-3-phosphate dehydrogenase [NAD(+)] 2, chloroplastic	gi|743818944|ref|XP_010931379.1|	PREDICTED: glycerol-3-phosphate dehydrogenase [NAD(+)], chloroplastic [Elaeis guineensis].	FUNHY15tr_m240lflr_TR33040_c0_g1_i1_3	glycerol-3-phosphate dehydrogenase	glycerol-3-phosphate dehydrogenase	GO:0004367, GO:0004416, GO:0008800, GO:0009331, GO:0009536, GO:0009627, GO:0016020, GO:0019243, GO:0045017, GO:0046168, GO:0046872, GO:0047952, GO:0051287, GO:0055114	4.01905	4.80518	4.84188	4.17485	5.81348	5.35353	3.85916	5.85877	3.21933	3.52869	3.78093	5.23815	4.92857	3.38645	3.71552	3.21124	6.52998	5.78406
Pp3c1_100V3.1	Pp3c1_100V1.1	Pp1s283_16V6.1		Pp1s283_16V2.1	Phypa_171260	Phpat.001G000800	6810	5215	16021	transport	transporter activity	integral component of membrane					gi|516195006|ref|WP_017604722.1|	aquaporin [Nocardiopsis alkaliphila].	PHYSPtr_onekp_YEPO_18419	glycerol uptake facilitator protein	glycerol uptake facilitator protein	GO:0005215, GO:0006810, GO:0016020	13.5868	16.7232	15.1467	13.1963	14.4997	15.28	18.406	14.6741	13.9316	16.4367	14.9965	11.221	13.8117	13.3248	13.357	11.2988	11.495	8.53188
Pp3c1_10100V3.1	Pp3c1_10100V1.1	Pp1s139_11V6.1		Pp1s139_11V2.1	Phypa_217261	Phpat.001G041400	16051	0004360:0030246		carbohydrate biosynthetic process	glutamine-fructose-6-phosphate transaminase (isomerizing) activity:carbohydrate binding				sp|Q58815|GLMS_METJA	Glutamine--fructose-6-phosphate aminotransferase [isomerizing]	gi|720089783|ref|XP_010244880.1|	PREDICTED: glutamine--fructose-6-phosphate aminotransferase [isomerizing] 2 [Nelumbo nucifera].	AULHEtr_onekp_WNGH_14995	F14O13.29; glucosamine--fructose-6-phosphate aminotransferase [isomerizing], putative / hexosephosphate aminotransferase, putative / glucosamine-6-phosphate synthase, putative / D-fructose-6-phosphate amidotransferase, putative / GLCN6P synthase, putative [EC:2.6.1.16] [KO:K00820] [Arabidopsis thaliana]	F14O13.29; glucosamine--fructose-6-phosphate aminotransferase [isomerizing], putative / hexosephosphate aminotransferase, putative / glucosamine-6-phosphate synthase, putative / D-fructose-6-phosphate amidotransferase, putative / GLCN6P synthase, putative [EC:2.6.1.16] [KO:K00820] [Arabidopsis thaliana]	GO:0004360, GO:0005529, GO:0005739, GO:0006002, GO:0006112, GO:0016051	8.46133	9.15723	9.29984	10.759	7.76404	9.49704	14.9862	13.2174	15.2732	19.0381	20.7575	15.8993	14.0678	11.7065	10.5269	15.8056	10.1985	17.3936
Pp3c1_10120V3.1	Pp3c1_10120V1.1	Pp1s139_13V6.1;Pp1s139_14V6.1		Pp1s139_13V2.1	Phypa_137722	Phpat.001G041700			16021			integral component of membrane					gi|590671051|ref|XP_007038227.1|	Mitochondrial import inner membrane translocase subunit Tim17/Tim22/Tim23 family protein isoform 2 [Theobroma cacao].	FUNHY15tr_m240lflr_TR6908_c0_g1_i1_2	MWD22.9; expressed protein	MWD22.9; expressed protein	GO:0005739, GO:0005743, GO:0008565, GO:0009536, GO:0015031, GO:0016020	6.64694	5.83424	7.63211	8.47504	6.92523	8.53102	9.42782	9.46717	8.18828	11.6938	12.4524	11.283	9.19957	8.08407	6.5791	10.2509	7.9247	10.5285
Pp3c1_10140V3.1		Pp1s139_14V6.1															gi|672132243|ref|XP_008789701.1|	PREDICTED: ATP synthase subunit epsilon, mitochondrial-like [Phoenix dactylifera].	PHYSPtr_m240lflr_YEPO_scaffold-YEPO-2076644-cf._Physcomicromitrium_sp._3_rc				4.1756		1.64342	1.16827	0.36331	1.61335	11.8918	8.03385	4.95946	4.61417	4.79607	3.64798	1.8366	1.52735	1.05048	1.95524	1.49632	2.97734
Pp3c1_10180V3.1	Pp3c1_10180V1.1		Pp1s139_18V6.1			Phpat.001G041900	45490	0046872:0030570		pectin catabolic process	metal ion binding:pectate lyase activity						gi|661883061|emb|CDP13269.1|	unnamed protein product [Coffea canephora].	FUNHY15tr_m240lflr_TR39430_c0_g1_i1_5_rc						0.0407945	0.0468461		0.020024			0.0478755	0.0216692		0.0181107		0.0442321		0.0452991		0.0413875
Pp3c1_10200V3.1	Pp3c1_10200V1.1	Pp1s139_27V6.1		Pp1s139_27V2.1	Phypa_217264	Phpat.001G042100	6661			phosphatidylinositol biosynthetic process			ARATHwo_AT1G36980.1	unknown protein; CONTAINS InterPro DOMAIN/s: Uncharacterised protein family UPF0220 (InterPro:IPR007919); Has 424 Blast hits to 424 proteins in 159 species: Archae - 0; Bacteria - 0; Metazoa - 228; Fungi - 120; Plants - 62; Viruses - 0; Other Eukaryotes - 14 (source: NCBI BLink).	sp|Q54T60|TMM50_DICDI	Transmembrane protein 50 homolog	gi|729311212|ref|XP_010530183.1|	PREDICTED: transmembrane protein 50 homolog [Tarenaya hassleriana].	PHYSPtr_m240lflr_YEPO_scaffold-YEPO-2015969-cf._Physcomicromitrium_sp._1	transmembrane protein 50a	transmembrane protein 50a	GO:0016020, GO:0016021, GO:0016023	21.6114	19.2551	19.8316	16.8018	14.4034	15.8865	22.8394	26.6408	19.3018	14.7197	18.088	18.2659	17.3757	15.5393	16.0906	15.7967	14.2176	15.0228
Pp3c1_10210V3.1	Pp3c1_10210V1.1	Pp1s139_28V6.1		Pp1s139_28V2.1	Phypa_234525	Phpat.001G042200	6397		5634	mRNA processing		nucleus			sp|Q6C186|CLF1_YARLI	Pre-mRNA-splicing factor CLF1	gi|731343874|ref|XP_010683112.1|	PREDICTED: pre-mRNA-splicing factor SYF1 [Beta vulgaris subsp. vulgaris].	PHYSPtr_onekp_YEPO_82448	xpa binding protein 2	xpa binding protein 2	GO:0005515, GO:0005654, GO:0006283, GO:0006350, GO:0006396	11.0809	15.1951	13.6722	8.25363	10.5756	10.0635	10.5845	7.78461	11.3519	11.9525	10.3916	10.4603	12.8511	13.5051	13.3265	10.7009	10.7484	12.1233
Pp3c1_10220V3.1	Pp3c1_10220V1.1	Pp1s139_29V6.1;Pp1s139_30V6.1		Pp1s139_29V2.1	Phypa_137721	Phpat.001G042300			16023			cytoplasmic membrane-bounded vesicle					gi|695056130|ref|XP_009416275.1|	PREDICTED: uncharacterized protein LOC103996933 [Musa acuminata subsp. malaccensis].	PHYSPtr_m240lflr_YEPO_scaffold-YEPO-2005572-cf._Physcomicromitrium_sp._8_rc	alpha beta fold family protein	alpha beta fold family protein	GO:0016020, GO:0016023	16.9172	16.3407	14.4384	13.8074	16.2342	15.8512	11.7707	15.3698	12.8964	12.2152	11.3897	10.6613	12.2073	12.0574	12.1269	12.6766	12.6389	12.4985
Pp3c1_10390V3.1	Pp3c1_10390V1.1	Pp1s139_35V6.1					8152	5488		metabolic process	binding		ARATHwo_AT3G01910.1	Encodes a homodimeric Mo-enzyme with molybdopterin as organic component of the molybdenum cofactor. It lacks the heme domain that other eukaryotic Mo-enzymes possess and has no redox-active centers other than the molybdenum. SO protein has been found in all parts of the plant. The plant SO combines its enzymatic sulfite oxidation with a subsequent nonenzymatic step using its reaction product H2O2…	sp|Q9S850|SUOX_ARATH	Sulfite oxidase	gi|697132590|ref|XP_009620347.1|	PREDICTED: sulfite oxidase [Nicotiana tomentosiformis].	PHYSPtr_m240lflr_YEPO_scaffold-YEPO-2011802-cf._Physcomicromitrium_sp._7_rc	sulfite oxidase	sulfite oxidase	GO:0005739, GO:0005777, GO:0006790, GO:0008482, GO:0009055, GO:0010477, GO:0015994, GO:0030151, GO:0055114	0.937911	0.16287	1.13379	0.329236		0.383808	3.96059	3.94775	1.69765	1.91057	2.28192	1.66624	1.10868	1.10216	1.09333	1.51946	0.860793	1.07094
Pp3c1_10400V3.1	Pp3c1_10400V1.1	Pp1s139_36V6.1				Phpat.001G042500	6508	8236		proteolysis	serine-type peptidase activity						gi|918642573|ref|WP_052527338.1|	hypothetical protein [Kineosporia aurantiaca].	PHYSPtr_onekp_YEPO_11786				24.3642	19.0368	23.775	21.2951	26.6427	20.8434	18.0369	20.4591	20.1744	14.8906	14.36	17.4514	15.9809	14.1931	16.0098	13.7255	17.1791	16.4204
Pp3c1_10430V3.1	Pp3c1_10430V1.1	Pp1s139_37V6.1;Pp1s139_38V6.1		Pp1s139_38V2.1	Phypa_167210	Phpat.001G042600	18342	8318		protein prenylation	protein prenyltransferase activity						gi|923555374|ref|XP_013737989.1|	PREDICTED: geranylgeranyl transferase type-2 subunit alpha-like isoform X1 [Brassica napus].	FUNHY15tr_m240lflr_TR6423_c0_g1_i1_1	T22A6.320; geranylgeranyl transferase alpha subunit-related / RAB geranylgeranyltransferase alpha subunit-related [Arabidopsis thaliana]:rab geranylgeranyl transferase like protein	:rab geranylgeranyl transferase like protein	GO:0008318, GO:0018346, GO:0046686	10.052	8.59978	8.63083	6.48186	6.95141	7.24656	8.93442	9.86739	9.09235	9.16904	6.93767	7.0583	7.84745	8.96136	7.66432	8.47695	7.54497	7.46332
Pp3c1_10439V3.1		Pp1s139_40V6.1																					0.993557	0.704192	0.48932	0.20433	0.137675	0.611375	2.65638	2.19597	0.887483	0.614348	1.19433	0.908429	0.782974	0.434089	0.547356	1.43247	0.876314	0.767213
Pp3c1_10449V3.1		Pp1s139_41V6.1																					0.175191		0.423557						0.124269			0.0940188			0.118448			0.214857
Pp3c1_10450V3.1	Pp3c1_10450V1.1	Pp1s139_41V6.1																	PHYSPtr_m240lflr_YEPO_scaffold-YEPO-2072317-cf._Physcomicromitrium_sp._1						0.279191			0.137041						0.247894
Pp3c1_10452V3.1		Pp1s139_41V6.1																	PHYSPtr_m240lflr_YEPO_scaffold-YEPO-2072317-cf._Physcomicromitrium_sp._2_rc				0.294186	0.507942	0.203215	0.0388934	0.0524119	0.199496		0.170997	0.119244				0.0496787		0.0568293		0.176615	0.0515421
Pp3c1_10460V3.1	Pp3c1_10460V1.1	Pp1s139_44V6.1		Pp1s139_44V2.1	Phypa_137698	Phpat.001G042900	0042546:0006952:0009607:0036065	8107	16020	cell wall biogenesis:defense response:response to biotic stimulus:fucosylation	galactoside 2-alpha-L-fucosyltransferase activity	membrane					gi|703073442|ref|XP_010089548.1|	MLP-like protein 34 [Morus notabilis].	PHYSPtr_m240lflr_YEPO_scaffold-YEPO-2079181-cf._Physcomicromitrium_sp._2	pr10 protein	pr10 protein	GO:0006952, GO:0009607	110.215	96.8398	99.2265	48.285	78.8691	58.3898	32.7387	66.8754	49.6596	48.1913	31.8319	35.6628	26.1631	36.9062	34.9171	60.5598	43.5327	36.2902			-1.64441				-1.03667
Pp3c1_10470V3.1	Pp3c1_10470V1.1		Pp1s139_18V6.1;Pp1s139_26V6.1;Pp1s139_45V6.1	Pp1s139_45V2.1	Phypa_137699		45490	0046872:0030570		pectin catabolic process	metal ion binding:pectate lyase activity						gi|747079034|ref|XP_011086701.1|	PREDICTED: probable pectate lyase 5 [Sesamum indicum].	CERPUGG1tr_m240lflr_isotig10279_4	pectate lyase	pectate lyase	GO:0016023, GO:0016023			0.068512	0.0786753		0.0168146	0.0547936		0.020101		0.0199941	0.0456237	0.0502461		0.0191595			0.0173769
Pp3c1_10500V3.1	Pp3c1_10500V1.1	Pp1s139_46V6.1		Pp1s139_46V2.1	Phypa_234529	Phpat.001G043300	0048193:0030244			Golgi vesicle transport:cellulose biosynthetic process							gi|29893636|gb|AAP06890.1|	hypothetical protein [Oryza sativa Japonica Group].	PHYSPtr_onekp_YEPO_81275				17.6825	20.2506	18.5488	19.3654	14.8362	19.8298	18.5475	16.1578	20.485	20.0561	20.9782	19.1441	18.7635	18.4116	20.3795	22.4069	16.8082	21.8117
Pp3c1_10530V3.1	Pp3c1_10530V1.1	Pp1s139_48V6.1		Pp1s139_48V2.1	Phypa_217277	Phpat.001G043400	0055075:1902476:0055064:0071805	15379	0016021:0005794	potassium ion homeostasis:chloride transmembrane transport:chloride ion homeostasis:potassium ion transmembrane transport	potassium:chloride symporter activity	integral component of membrane:Golgi apparatus			sp|P55017|S12A3_HUMAN	Solute carrier family 12 member 3	gi|695078806|ref|XP_009386801.1|	PREDICTED: cation-chloride cotransporter 1-like isoform X1 [Musa acuminata subsp. malaccensis].	FUNHY15tr_m240lflr_TR48090_c0_g1_i5_7_rc	cation chloride cotransporter	cation chloride cotransporter	GO:0005886, GO:0006814, GO:0006821, GO:0015377, GO:0016020, GO:0016021, GO:0055085	12.9584	14.4041	13.1448	12.9291	10.7987	13.047	12.105	13.375	16.052	16.8346	14.2555	12.4457	15.8628	17.3657	15.7745	15.9012	13.688	15.1058
Pp3c1_10540V3.1	Pp3c1_10540V1.1	Pp1s139_49V6.1;Pp1s139_50V6.1		Pp1s139_50V2.1	Phypa_137711	Phpat.001G043500							ARATHwo_AT1G80770.1	pigment defective 318 (PDE318); FUNCTIONS IN: ferrous iron transmembrane transporter activity, GTP binding; INVOLVED IN: ferrous iron transport; LOCATED IN: integral to membrane; EXPRESSED IN: 21 plant structures; EXPRESSED DURING: 13 growth stages; CONTAINS InterPro DOMAIN/s: GTP1/OBG (InterPro:IPR006073), Nucleolar GTP-binding 1 (InterPro:IPR010674), Ferrous iron transport protein B, N-terminal…	sp|Q99ME9|NOG1_MOUSE	Nucleolar GTP-binding protein 1	gi|848869032|ref|XP_012835143.1|	PREDICTED: nucleolar GTP-binding protein 1 [Erythranthe guttata].	PHYSPtr_m240lflr_YEPO_scaffold-YEPO-2001066-cf._Physcomicromitrium_sp._5_rc	nucleolar gtp-binding	nucleolar gtp-binding	GO:0005525, GO:0044464	9.85002	12.8503	13.223	10.0405	17.536	10.8422	9.31592	8.80934	8.45525	8.68519	7.25199	10.1701	9.40759	10.4079	10.3274	8.4793	9.62367	10.0887
Pp3c1_10550V3.1		Pp1s139_51V6.1				Phpat.001G043600													PHYSPtr_m240lflr_YEPO_scaffold-YEPO-2014617-cf._Physcomicromitrium_sp._2_rc				6.21651	7.53556	6.18475	4.73481	5.00838	4.30886	7.23338	7.61048	6.71195	5.86392	6.98679	5.55047	4.61713	7.21066	6.39756	7.01537	5.24033	8.36619
Pp3c1_10570V3.1	Pp3c1_10570V1.1	Pp1s139_51V6.1;Pp1s139_52V6.1		Pp1s139_52V2.1	Phypa_234532	Phpat.001G043700	0009694:0009753		5634	jasmonic acid metabolic process:response to jasmonic acid		nucleus					gi|596142677|ref|XP_007222563.1|	hypothetical protein PRUPE_ppa008383mg [Prunus persica].	FUNHY15tr_m240lflr_TR50354_c0_g1_i1_2_rc			GO:0003677, GO:0003899, GO:0005730	15.876	11.8132	12.9886	8.5092	14.6535	8.00348	14.0664	11.9591	15.4213	10.1942	11.8518	11.6224	7.82358	10.5417	8.80808	8.79986	9.27132	8.37391
Pp3c1_10580V3.1	Pp3c1_10580V1.1		Pp1s139_54V6.1;Pp1s29_171V6.1	Pp1s139_52V2.2	Phypa_85888		6351	0003899:0003677		transcription, DNA-templated	DNA-directed RNA polymerase activity:DNA binding						gi|529274178|gb|AGS78371.1|	RNA polymerase I, partial [Ambrosiozyma llanquihuensis].		dna-directed rna polymerase subunit a:dna-directed rna polymerase ii largest subunit (rna polymerase ii subunit 1)	dna-directed rna polymerase subunit a:dna-directed rna polymerase ii largest subunit (rna polymerase ii subunit 1)	GO:0003677, GO:0003899, GO:0005730
Pp3c1_10590V3.1	Pp3c1_10590V1.1	Pp1s139_55V6.1	Pp1s29_171V6.1	Pp1s139_56V2.1	Phypa_231802	Phpat.001G043800	6284	4844		base-excision repair	uracil DNA N-glycosylase activity				sp|Q3IG47|UNG_PSEHT	Uracil-DNA glycosylase	gi|492675096|ref|WP_005918519.1|	uracil-DNA glycosylase [Fusobacterium hwasookii].	CLIDEtr_onekp_MIRS_80002	uracil-dna glycosylase	uracil-dna glycosylase	GO:0004844, GO:0006284
Pp3c1_10611V3.1							90305	0003677:0004518		nucleic acid phosphodiester bond hydrolysis	DNA binding:nuclease activity				sp|Q8PYF6|FEN_METMA	Flap endonuclease 1	gi|850507884|ref|WP_048047569.1|	flap endonuclease-1 [Methanosarcina mazei].	CLIDEtr_onekp_MIRS_84034
Pp3c1_10620V3.1	Pp3c1_10620V1.1	Pp1s139_64V6.1		Pp1s139_63V2.1:Pp1s139_64V2.1	Phypa_85892:Phypa_217284	Phpat.001G043900	55085		16020	transmembrane transport		membrane					gi|514716052|ref|XP_004953400.1|	PREDICTED: mechanosensitive ion channel protein 6-like [Setaria italica].	FUNHY15tr_m240lflr_TR874_c0_g1_i1_4	msl6 (mechanosensitive channel of small conductance-like 6)	msl6 (mechanosensitive channel of small conductance-like 6)	GO:0005886, GO:0016020	14.0601	13.7759	11.7695	15.7068	18.476	23.9228	10.0985	5.39893	7.01052	10.791	9.3115	14.3755	18.9149	16.3468	21.7303	28.9547	22.4425	29.9055		1.23748		1.3395
Pp3c1_10630V3.1	Pp3c1_10630V1.1	Pp1s139_65V6.1		Pp1s139_65V2.1	Phypa_46640	Phpat.001G044000							ARATHwo_AT2G38820.2	Protein of unknown function (DUF506) ; CONTAINS InterPro DOMAIN/s: Protein of unknown function DUF506, plant (InterPro:IPR006502); BEST Arabidopsis thaliana protein match is: Protein of unknown function (DUF506) (TAIR:AT3G22970.1); Has 35333 Blast hits to 34131 proteins in 2444 species: Archae - 798; Bacteria - 22429; Metazoa - 974; Fungi - 991; Plants - 531; Viruses - 0; Other Eukaryotes - 9610 …			gi|502139881|ref|XP_004503951.1|	PREDICTED: uncharacterized protein LOC101495246 isoform X2 [Cicer arietinum].	PHYSPtr_m240lflr_YEPO_scaffold-YEPO-2018364-cf._Physcomicromitrium_sp._5_rc	F13I13.5; expressed protein [Arabidopsis thaliana]	F13I13.5; expressed protein [Arabidopsis thaliana]	GO:0009536	1.95473	2.98711	2.05742	5.30225	1.19787	3.41961	2.10705	1.57697	3.22734	2.31556	2.2828	3.11094	4.66113	1.67861	1.89128	2.3977	2.1717	2.23198
Pp3c1_10660V3.1	Pp3c1_10660V1.1	Pp1s139_66V6.1		Pp1s139_66V2.1	Phypa_85895														PSEELtr_onekp_QKQO_45626				0.188766	0.135801	0.0977953	0.299474	0.0672608	0.16001		0.0731475	0.34431	0.0346312		0.0578882	0.223136	0.141382	0.182324	0.18099		0.0992167
Pp3c1_10680V3.1	Pp3c1_10680V1.1	Pp1s139_70V6.1		Pp1s139_71V2.1	Phypa_137732		1903047:0008152	166	0043234:0015630:0044430	mitotic cell cycle process:metabolic process	nucleotide binding	protein complex:microtubule cytoskeleton:cytoskeletal part					gi|571467187|ref|XP_006583866.1|	PREDICTED: phragmoplast orienting kinesin 2-like isoform X2 [Glycine max].		T15B3.190; kinesin motor protein-related	T15B3.190; kinesin motor protein-related	GO:0003777, GO:0005524, GO:0007018, GO:0015986	0.419289	0.270148	0.242247	0.179749	0.249916	0.296353	0.544462	0.18398	0.354276	0.300905	0.408949	0.364	0.229594	0.39197	0.245966	0.248304	0.263443	0.344075
Pp3c1_10690V3.1	Pp3c1_10690V1.1	Pp1s139_72V6.1		Pp1s139_72V2.1	Phypa_137658	Phpat.001G044100	6810	5215	16020	transport	transporter activity	membrane					gi|802645008|ref|XP_012079337.1|	PREDICTED: metal transporter Nramp3 [Jatropha curcas].	PHYSPtr_m240lflr_YEPO_scaffold-YEPO-2018239-cf._Physcomicromitrium_sp._2	nramp transporter:natural resistance-associated macrophage	nramp transporter:natural resistance-associated macrophage	GO:0005215, GO:0006810, GO:0016020	18.5642	13.4247	17.2368	22.3597	14.8617	16.901	13.2083	18.5681	9.28372	7.56353	11.3972	17.6705	18.8297	9.97667	19.1881	11.8123	21.4698	17.6563
Pp3c1_10700V3.1	Pp3c1_10700V1.1	Pp1s139_74V6.1		Pp1s139_74V2.1	Phypa_137671	Phpat.001G044200	8152	0003924:0005525		metabolic process	GTPase activity:GTP binding						gi|702302444|ref|XP_010049219.1|	PREDICTED: interferon-induced guanylate-binding protein 1-like [Eucalyptus grandis].	FUNHY15tr_m240lflr_TR27285_c0_g1_i1_4	MCL19.12; expressed protein	MCL19.12; expressed protein	GO:0003924, GO:0005525, GO:0006955	12.4255	13.7903	14.2175	10.7369	10.824	10.0476	12.0214	11.5311	10.1519	8.92827	8.13586	10.637	10.1234	9.37937	10.7303	7.46576	10.508	9.60164
Pp3c1_10710V3.1	Pp3c1_10710V1.1						0044260:0090304	3824		cellular macromolecule metabolic process:nucleic acid metabolic process	catalytic activity						gi|848899515|ref|XP_012849908.1|	PREDICTED: uncharacterized protein LOC105969681 [Erythranthe guttata].	CALCOtr_onekp_TAVP_74186										0.186353
Pp3c1_10715V3.1																			PHYSPtr_onekp_YEPO_16627				0.0276054	0.0278037	0.0667414		0.0688542		0.07117	0.0748804	0.078326		0.116864		0.0326317	0.0361827	0.0746573		0.0773403	0.0338557
Pp3c1_10719V3.1		Pp1s139_78V6.1																	PHYSPtr_m240lflr_YEPO_scaffold-YEPO-2016628-cf._Physcomicromitrium_sp._2_rc				0.254454											0.0341392					0.0445555
Pp3c1_10720V3.1	Pp3c1_10720V1.1	Pp1s139_78V6.1		Pp1s139_78V2.1	Phypa_234537														FUNHY15tr_m240lflr_TR42355_c1_g1_i2_3_rc				0.029121	0.0733256		0.471625	0.0363172	0.207352			0.0413132			0.125026	0.0172117	0.0381693	0.0393781		0.0611899	0.0892863
Pp3c1_10740V3.1		Pp1s139_80V6.1																					2.54991	1.86404	2.53557	1.86501	1.89776	1.75706	2.27969	2.11964	3.55914	1.16198	2.20538	1.14773	1.60433	1.99454	1.11227	2.31868	1.44031	0.756594
Pp3c1_10760V3.1	Pp3c1_10760V1.1	Pp1s139_77V6.1		Pp1s139_77V2.1	Phypa_217293	Phpat.001G044500	6400	0000287:0008193		tRNA modification	magnesium ion binding:tRNA guanylyltransferase activity						gi|743786724|ref|XP_010922243.1|	PREDICTED: tRNA(His) guanylyltransferase 1-like isoform X1 [Elaeis guineensis].	PHYSPtr_m240lflr_YEPO_scaffold-YEPO-2078786-cf._Physcomicromitrium_sp._1	T32F6.15; expressed protein [Arabidopsis thaliana]			7.25489	7.48997	8.523	5.6423	6.25833	5.94182	5.41508	6.19014	6.57162	6.99863	7.16151	5.58123	5.77091	6.01199	5.38872	5.88269	4.56451	4.92914
Pp3c1_1080V3.1	Pp3c1_1080V1.1	Pp1s200_95V6.1																								0.0550038						0.0763278		0.0637933	0.281026
Pp3c1_10810V3.1	Pp3c1_10810V1.1	Pp1s139_84V6.1		Pp1s139_84V2.1	Phypa_137696	Phpat.001G044700	0036065:0042546:0006468	0004672:0005524:0008107	16020	fucosylation:cell wall biogenesis:protein phosphorylation	protein kinase activity:ATP binding:galactoside 2-alpha-L-fucosyltransferase activity	membrane					gi|720085929|ref|XP_010243675.1|	PREDICTED: probable LRR receptor-like serine/threonine-protein kinase At1g56140 isoform X3 [Nelumbo nucifera].	PHYSPtr_m240lflr_YEPO_scaffold-YEPO-2015612-cf._Physcomicromitrium_sp._7_rc	serine threonine-protein kinase:atp binding	serine threonine-protein kinase:atp binding	GO:0004672, GO:0005524, GO:0006468, GO:0016020	7.1465	8.42673	7.30994	6.35313	6.62167	5.68048	9.14312	10.8746	9.72006	10.4692	8.79804	7.613	10.1753	9.98209	9.40983	9.75493	9.6353	9.24145
Pp3c1_10830V3.1	Pp3c1_10830V1.1	Pp1s35_326V6.1		Pp1s35_326V2.1	Phypa_121215	Phpat.001G044800	32259	8168		methylation	methyltransferase activity						gi|260942847|ref|XP_002615722.1|	hypothetical protein CLUG_04604 [Clavispora lusitaniae ATCC 42720].	BUXAPtr_onekp_HRWG_12438	methyltransferase type 11	methyltransferase type 11	GO:0005739, GO:0008152, GO:0008168	8.04369	10.6933	8.72579	7.86339	8.31576	8.37406	6.5509	7.59485	7.34735	8.58402	7.46816	5.85414	6.21767	8.01858	7.5941	7.77751	5.84925	6.01422
Pp3c1_10850V3.1	Pp3c1_10850V1.1	Pp1s35_324V6.1		Pp1s35_324V2.1	Phypa_72163	Phpat.001G044900											gi|302772635|ref|XP_002969735.1|	hypothetical protein SELMODRAFT_440925 [Selaginella moellendorffii].	PHYSPtr_onekp_YEPO_19468	glycoprotein 96-92, putative [Leishmania major]			2.27497	2.88262	1.12369	0.249022	0.183042	0.987012	24.0912	21.565	7.91242	7.82229	10.2177	9.3471	4.16391	4.68115	3.24166	4.79407	2.29588	5.04011				-2.14909		4.27083	3.09248
Pp3c1_10860V3.1	Pp3c1_10860V1.1	Pp1s35_323V6.1		Pp1s35_323V2.1	Phypa_121101		0006468:0048856:0009966:0044767	0004674:0005524		protein phosphorylation:anatomical structure development:regulation of signal transduction:single-organism developmental process	protein serine/threonine kinase activity:ATP binding						gi|359474195|ref|XP_003631415.1|	PREDICTED: mitogen-activated protein kinase kinase kinase YODA [Vitis vinifera].	FUNHY15tr_m240lflr_TR25636_c0_g1_i1_5_rc	atp binding	atp binding	GO:0004674, GO:0005524, GO:0006468	0.660037	1.36809	1.57264	0.840997	0.775423	1.27142	3.4403	3.23045	4.80402	4.42246	4.04956	4.05556	2.10319	3.42286	2.65168	3.50542	2.46558	2.76866
Pp3c1_10875V3.1																			FUNHY15tr_m240lflr_TR32545_c0_g1_i1_1				0.784782	0.697429	0.725462	0.21361		0.438269	0.416554	0.12522	0.261964	0.414993		0.198196	0.218276	0.605072	0.436965	0.371801	0.452668	0.566159
Pp3c1_10880V3.1	Pp3c1_10880V1.1	Pp1s35_319V6.1		Pp1s35_319V2.1	Phypa_121350	Phpat.001G045100	8152	16597		metabolic process	amino acid binding		ARATHwo_AT2G39570.1	Encodes a ACT domain-containing protein. The ACT domain, named after bacterial aspartate kinase, chorismate mutase and TyrA (prephenate dehydrogenase), is a regulatory domain that serves as an amino acid-binding site in feedback-regulated amino acid metabolic enzymes.	sp|Q9FHP1|ACR1_ARATH	ACT domain-containing protein ACR1	gi|302810022|ref|XP_002986703.1|	hypothetical protein SELMODRAFT_124581 [Selaginella moellendorffii].	PHYSPtr_m240lflr_YEPO_scaffold-YEPO-2019614-cf._Physcomicromitrium_sp._8_rc	amino acid binding	amino acid binding	GO:0008152, GO:0016597	17.8141	19.7088	18.825	24.4404	10.2817	18.1336	31.3549	25.6938	40.1759	35.2672	33.9941	32.6554	27.0017	34.2829	33.0494	38.0662	25.9918	33.4645
Pp3c1_10900V3.1	Pp3c1_10900V1.1	Pp1s35_313V6.1
Pp3c1_1090V3.1	Pp3c1_1090V1.1	Pp1s200_94V6.1						3824			catalytic activity						gi|565304386|gb|ETE59994.1|	Histone-lysine N-methyltransferase, H3 lysine-79 specific, partial [Ophiophagus hannah].	PINTA_000005030
Pp3c1_10910V3.1	Pp3c1_10910V1.1	Pp1s35_312V6.1																								0.164757									0.210444
Pp3c1_10940V3.1	Pp3c1_10940V1.1																gi|590636595|ref|XP_007028892.1|	Uncharacterized protein TCM_024822 [Theobroma cacao].	LEUBRtr_m240lflr_ZACW_scaffold-ZACW-2076965-Leucodon_sciuroides_1_rc
Pp3c1_1095V3.1		Pp1s200_94V6.1															gi|676464872|ref|XP_009057060.1|	hypothetical protein LOTGIDRAFT_162784 [Lottia gigantea].	SOLPEwo_Sopen08g013940.1								0.0224203
Pp3c1_10970V3.1	Pp3c1_10970V1.1	Pp1s35_305V6.1		Pp1s35_305V2.1	Phypa_179436	Phpat.001G045200							ARATHwo_AT1G73066.1	Leucine-rich repeat family protein; INVOLVED IN: biological_process unknown; LOCATED IN: endomembrane system; EXPRESSED IN: embryo, pedicel, carpel, stamen; EXPRESSED DURING: 4 anthesis, C globular stage, petal differentiation and expansion stage; CONTAINS InterPro DOMAIN/s: Leucine-rich repeat-containing N-terminal domain, type 2 (InterPro:IPR013210), Leucine-rich repeat (InterPro:IPR001611); BE…	sp|Q00874|DR100_ARATH	DNA-damage-repair/toleration protein DRT100	gi|685356334|ref|XP_009113077.1|	PREDICTED: leucine-rich repeat extensin-like protein 2 isoform X1 [Brassica rapa].	FUNHY15tr_m240lflr_TR2852_c0_g1_i1_3_rc	leucine-rich repeat family protein extensin family protein	leucine-rich repeat family protein extensin family protein	GO:0005515, GO:0005618, GO:0009505						0.022886				0.0495327	0.0272137	0.0413985						0.0236515
Pp3c1_11010V3.1	Pp3c1_11010V1.1					Phpat.001G045300													FUNHY15tr_m240lflr_TR43476_c0_g2_i1_4_rc				0.188502		0.227869	0.0581494	0.078361			0.170439	0.445703	0.564851	0.266	0.269766	0.371372	0.164714	0.169931		0.264057	0.385302
Pp3c1_11020V3.1	Pp3c1_11020V1.1																		PICGLtr_m240lflr_GQ0194_M04.2_1																				0.0767344
Pp3c1_11030V3.1	Pp3c1_11030V1.1	Pp1s139_88V6.1		Pp1s139_88V2.1	Phypa_217301	Phpat.001G045400	6869	8289		lipid transport	lipid binding				sp|Q06841|NO75_LUPLU	Early nodulin-75	gi|565366167|ref|XP_006349765.1|	PREDICTED: non-specific lipid-transfer protein-like protein At5g64080-like [Solanum tuberosum].	PLAINtr_onekp_BGXB_79866	Non-specific lipid-transfer protein	Non-specific lipid-transfer protein	GO:0006869, GO:0008289	20.8825	10.559	10.5439	18.0294	13.3655	15.136	9.13706	6.13071	10.5074	10.8198	13.8655	10.6147	7.12445	8.90111	4.90717	10.1414	8.44282	7.67798
Pp3c1_11040V3.1	Pp3c1_11040V1.1	Pp1s139_90V6.1;Pp1s139_92V6.1		Pp1s139_90V2.1:Pp1s139_91V2.1	Phypa_44714:Phypa_234543	Phpat.001G045500	0006468:0009966	0005524:0004674		protein phosphorylation:regulation of signal transduction	ATP binding:protein serine/threonine kinase activity						gi|702383386|ref|XP_010064059.1|	PREDICTED: probable LRR receptor-like serine/threonine-protein kinase At1g56130 [Eucalyptus grandis].	FUNHY15tr_m240lflr_TR29181_c0_g2_i1_17_rc	protein kinase domain containing expressed	protein kinase domain containing expressed	GO:0004674, GO:0005515, GO:0005524, GO:0006468, GO:0007186, GO:0016020, GO:0016021	5.79696	4.51705	4.46474	7.01598	5.07362	5.78365	6.21078	5.42351	6.28372	9.24559	8.85624	7.50374	6.24517	4.77727	4.92857	5.74055	5.71838	6.30914
Pp3c1_11050V3.1	Pp3c1_11050V1.1	Pp1s139_94V6.1		Pp1s139_91V2.1	Phypa_234543	Phpat.001G045600	0016310:0007165	4672		phosphorylation:signal transduction	protein kinase activity						gi|702240221|ref|XP_010044534.1|	PREDICTED: probable leucine-rich repeat receptor-like protein kinase At5g49770 isoform X2 [Eucalyptus grandis].	CERPUR40tr_m240lflr_isotig10338_3_rc	receptor protein	receptor protein	GO:0005515, GO:0016020	6.48421	5.93566	5.73313	3.95736	7.42721	6.05265	3.22715	3.33213	3.37516	2.91552	3.24751	4.02228	3.12475	2.99602	2.98578	2.67171	4.87923	3.54709
Pp3c1_11070V3.1	Pp3c1_11070V1.1	Pp1s139_95V6.1		Pp1s139_95V2.1	Phypa_107211	Phpat.001G045700	398		0005681:0005829	mRNA splicing, via spliceosome		spliceosomal complex:cytosol					gi|685344535|ref|XP_009108510.1|	PREDICTED: protein BUD31 homolog 1-like [Brassica rapa].	PHYSPtr_m240lflr_YEPO_scaffold-YEPO-2075547-cf._Physcomicromitrium_sp._1_rc	g10-like protein	g10-like protein	GO:0005634, GO:0005739	15.7844	18.7772	21.2713	18.2595	15.6676	17.5849	16.9731	15.2367	15.5379	13.8069	13.9211	17.4173	19.6579	19.7388	20.854	14.7558	14.3271	16.6422
Pp3c1_11090V3.1	Pp3c1_11090V1.1	Pp1s139_98V6.1		Pp1s139_98V2.1	Phypa_137710	Phpat.001G045800	0016114:0009228:0052865	0046872:0008661	9507	terpenoid biosynthetic process:thiamine biosynthetic process:1-deoxy-D-xylulose 5-phosphate biosynthetic process	metal ion binding:1-deoxy-D-xylulose-5-phosphate synthase activity	chloroplast					gi|350539507|ref|NP_001234672.1|	1-D-deoxyxylulose 5-phosphate synthase [Solanum lycopersicum].	FUNHY15tr_m240lflr_TR5581_c0_g2_i1_1	1-deoxy-d-xylulose-5-phosphate synthase	1-deoxy-d-xylulose-5-phosphate synthase	GO:0008661, GO:0009228, GO:0009536, GO:0016114, GO:0016624	40.7716	45.4674	47.8481	64.3588	64.0311	58.8495	59.1932	46.5141	61.4666	77.2773	73.1239	77.6548	77.0234	74.1918	78.6418	91.0635	79.8012	88.6228
Pp3c1_110V3.1	Pp3c1_110V1.1	Pp1s283_17V6.1		Pp1s283_17V2.1:Pp1s283_19V2.1	Phypa_95573:Phypa_95575														PHYSPtr_m240lflr_YEPO_scaffold-YEPO-2019416-cf._Physcomicromitrium_sp._5_rc	T29J13.70; hypothetical protein [Arabidopsis thaliana]	T29J13.70; hypothetical protein [Arabidopsis thaliana]	GO:0006499, GO:0009507	3.86819	1.60422	1.87959	2.17596	0.331064	3.46536	40.4772	35.1295	17.0011	14.1237	15.2517	16.3632	4.84146	6.41215	4.20503	7.73766	2.86869	5.48817		-1.50698		-2.58381		2.93734	3.65508
Pp3c1_11100V3.1		Pp1s139_101V6.1				Phpat.001G045900													DIPFOtr_onekp_AWOI_63759						0.102617	0.471357		0.100739	1.96966	1.84209	1.80643	1.09016	0.479153	1.45781	0.70241	0.445055	1.60703	1.13948	0.713477	0.728757
Pp3c1_11130V3.1	Pp3c1_11130V1.1																		BUXAPtr_onekp_HRWG_12840
Pp3c1_11190V3.1	Pp3c1_11190V1.1	Pp1s139_105V6.1		Pp1s139_105V2.1	Phypa_234547	Phpat.001G046000											gi|302774997|ref|XP_002970915.1|	hypothetical protein SELMODRAFT_441307 [Selaginella moellendorffii].	PHYSPtr_onekp_YEPO_79622	td and poz domain containing 2	td and poz domain containing 2	GO:0005515	27.683	25.8828	24.1674	30.5363	20.0336	23.3326	31.794	30.9841	28.8609	38.9232	41.6608	27.849	29.2042	30.2144	26.0274	36.2161	27.6288	27.1303
Pp3c1_11210V3.1	Pp3c1_11210V1.1
Pp3c1_11290V3.1																							0.866089		0.418787	0.320608	0.216022						0.488865	0.18592	0.204757	0.454077	0.702687
Pp3c1_11310V3.1	Pp3c1_11310V1.1	Pp1s139_117V6.1		Pp1s139_115V2.1	Phypa_231824	Phpat.001G046200																	79.4303	53.2069	95.9173	66.041	69.0789	49.6247	37.0014	52.6672	21.4043	37.4564	74.2498	47.1835	61.1047	33.6568	53.4764	35.8226	65.112	40.8729
Pp3c1_11340V3.1	Pp3c1_11340V1.1																		PHYSPtr_onekp_YEPO_3638				0.142423
Pp3c1_11420V3.1	Pp3c1_11420V1.1	Pp1s139_123V6.1		Pp1s139_123V2.1	Phypa_234548	Phpat.001G046300	6414	3746		translational elongation	translation elongation factor activity								AULHEtr_onekp_WNGH_83261				16.864	16.5829	16.9794	19.4057	13.5043	16.932	19.3646	20.344	16.9045	15.502	14.9672	21.4588	14.7673	14.4547	16.0527	14.5651	16.8161	14.6409
Pp3c1_11480V3.1		Pp1s139_127V6.1																						0.176852				0.104189
Pp3c1_11500V3.1	Pp3c1_11500V1.1	Pp1s139_131V6.1		Pp1s139_131V2.1	Phypa_137645	Phpat.001G046400	55114	0050660:0050661:0004499		oxidation-reduction process	flavin adenine dinucleotide binding:NADP binding:N,N-dimethylaniline monooxygenase activity				sp|Q99518|FMO2_HUMAN	Dimethylaniline monooxygenase [N-oxide-forming] 2	gi|922354573|ref|XP_013453101.1|	indole-3-pyruvate monooxygenase [Medicago truncatula].	FUNHY15tr_m240lflr_TR23807_c0_g1_i1_7_rc	flavine-containing monoxygenase	flavine-containing monoxygenase	GO:0004497, GO:0050660	2.35139	3.35203	0.415438	1.57348	0.947409	1.63135	0.839377	1.05486	0.923776	0.673631	1.12306	1.16484	0.833858	0.687522	0.904965	0.776946	1.14019	0.976051
Pp3c1_11520V3.1	Pp3c1_11520V1.1																		CANSA_PK13410.1
Pp3c1_1160V3.1	Pp3c1_1160V1.1	Pp1s200_89V6.1		Pp1s200_89V2.1	Phypa_169207	Phpat.001G005300							ARATHwo_AT4G30620.1	Uncharacterised BCR, YbaB family COG0718; INVOLVED IN: biological_process unknown; LOCATED IN: chloroplast, chloroplast envelope; EXPRESSED IN: 21 plant structures; EXPRESSED DURING: 13 growth stages; CONTAINS InterPro DOMAIN/s: Uncharacterised protein family UPF0133 (InterPro:IPR004401); BEST Arabidopsis thaliana protein match is: Uncharacterised BCR, YbaB family COG0718 (TAIR:AT2G24020.2); Has …	sp|Q8YM73|Y5067_NOSS1	Nucleoid-associated protein alr5067	gi|763740107|gb|KJB07606.1|	hypothetical protein B456_001G0327002, partial [Gossypium raimondii].	PHYSPtr_m240lflr_YEPO_scaffold-YEPO-2008945-cf._Physcomicromitrium_sp._3_rc	at4g30620 f17i23_40	at4g30620 f17i23_40	GO:0009535, GO:0009536, GO:0009570, GO:0009579, GO:0009941	14.9891	15.7873	18.9482	18.4282	25.8439	23.8159	16.3091	12.3412	12.8649	17.9288	19.4805	15.1517	16.5027	14.4591	17.8246	17.5268	17.7667	18.3064
Pp3c1_11610V3.1	Pp3c1_11610V1.1																						0.839614		0.608979	0.310807			0.432925									0.225408		0.205943
Pp3c1_11630V3.1	Pp3c1_11630V1.1	Pp1s443_18V6.1		Pp1s443_18V2.1	Phypa_100863														FUNHY15tr_m240lflr_TR2667_c0_g2_i1_2	Glycine-rich cell wall structural protein 2 precursor [no tax name]	Glycine-rich cell wall structural protein 2 precursor [no tax name]	GO:0005886, GO:0016020	9.05727	11.2849	15.1962	3.39616	1.5093	8.20036	146.747	113.363	138.628	105.286	108.418	94.3232	36.9647	45.5414	50.2039	65.4531	27.8361	74.931			1.90068	-1.58807		4.55511	3.48821		3.68238
Pp3c1_11670V3.1	Pp3c1_11670V1.1	Pp1s443_16V6.1
Pp3c1_11690V3.1	Pp3c1_11690V1.1	Pp1s443_12V6.1		Pp1s443_12V2.1	Phypa_154853	Phpat.001G046600	55114	0020037:0016705:0004497:0005506		oxidation-reduction process	heme binding:oxidoreductase activity, acting on paired donors, with incorporation or reduction of molecular oxygen:monooxygenase activity:iron ion binding						gi|350536665|ref|NP_001234514.1|	sterol 22-desaturase [Solanum lycopersicum].	FUNHY15tr_m240lflr_TR11372_c0_g1_i1_8_rc	cytochrome p450-like protein	cytochrome p450-like protein	GO:0000249, GO:0004497, GO:0009055, GO:0016020, GO:0016023, GO:0019825, GO:0020037, GO:0022900	2.80333	2.8695	3.7203	1.33946	1.36803	1.84419	12.962	10.7656	7.15428	6.8676	8.4062	7.84931	2.12512	3.29493	4.03794	4.86734	2.68911	4.746
Pp3c1_1170V3.1	Pp3c1_1170V1.1	Pp1s200_88V6.1		Pp1s200_88V2.1	Phypa_169206	Phpat.001G005400	0006351:0055114	0016491:0003677	5634	transcription, DNA-templated:oxidation-reduction process	oxidoreductase activity:DNA binding	nucleus					gi|255538844|ref|XP_002510487.1|	lysine-specific histone demethylase, putative [Ricinus communis].	PSEELtr_onekp_QKQO_51744	SWIRM domain protein:lysine-specific histone	:lysine-specific histone	GO:0003700, GO:0005654, GO:0005667, GO:0008134, GO:0008283, GO:0009055, GO:0010553, GO:0010843, GO:0016491, GO:0045944, GO:0046886	11.8859	15.0654	13.4206	13.8363	13.863	13.3929	12.372	9.99981	16.1608	15.8991	14.3608	12.8485	13.9749	13.6999	14.2483	13.945	12.6829	13.0093
Pp3c1_11720V3.1	Pp3c1_11720V1.1							5488			binding								ZEAMAwo_GRMZM2G352926_P01							0.0493585		0.0632937	0.206255			0.0684939	0.225787	0.228983		0.139813	0.0721204		0.0747123
Pp3c1_11740V3.1	Pp3c1_11740V1.1	Pp1s443_9V6.1
Pp3c1_11820V3.1	Pp3c1_11820V1.1	Pp1s443_2V6.1		Pp1s443_2V2.1	Phypa_173334	Phpat.001G046700	6412	3735	5840	translation	structural constituent of ribosome	ribosome					gi|302808363|ref|XP_002985876.1|	hypothetical protein SELMODRAFT_424940 [Selaginella moellendorffii].	FUNHY15tr_m240lflr_TR12171_c0_g1_i1_4_rc			GO:0005576, GO:0005618, GO:0005886, GO:0016020	12.4144	10.7195	9.82781	9.89163	8.9872	11.6962	15.5345	15.3588	11.9418	11.5878	11.6219	12.041	15.4801	13.6325	14.0028	12.9249	12.8519	13.2385
Pp3c1_11880V3.1	Pp3c1_11880V1.1																							0.22006
Pp3c1_11890V3.1	Pp3c1_11890V1.1	Pp1s398_5V6.1					6259			DNA metabolic process							gi|751832257|emb|CEL62878.1|	hypothetical protein RSOLAG1IB_10546 [Rhizoctonia solani AG-1 IB].	PHIFOtr_m240lflr_ORKS_scaffold-ORKS-2052153-Philonotis_fontana_2_rc
Pp3c1_11910V3.1	Pp3c1_11910V1.1	Pp1s398_7V6.1		Pp1s398_7V2.1	Phypa_99781	Phpat.001G047000											gi|657996905|ref|XP_008390827.1|	PREDICTED: uncharacterized protein LOC103453071 [Malus domestica].	SCOAQtr_onekp_BPSG_11004	F28L1.9; expressed protein [Arabidopsis thaliana]	F28L1.9; expressed protein [Arabidopsis thaliana]	GO:0016020	0.0466302	0.422686	0.0751582	0.15823	0.116306	0.0553372	1.82331	1.55999	0.992293	0.898256	1.05282	1.11778	0.606325	0.448203	0.924797	0.521608	0.457243	0.876882
Pp3c1_11980V3.1	Pp3c1_11980V1.1	Pp1s398_10V6.1;Pp1s398_11V6.1		Pp1s398_10V2.1	Phypa_172958	Phpat.001G047100											gi|586686932|ref|XP_006842059.1|	PREDICTED: uncharacterized protein LOC18431876 [Amborella trichopoda].	FUNHY15tr_m240lflr_TR25341_c0_g1_i1_1	F10M6.40; expressed protein [Arabidopsis thaliana]			0.162141	0.244958	0.130669	0.100035	0.26961	0.176382	1.53273	1.44771	1.45682	1.70051	1.33467	1.04418	0.383325	0.796948	0.347146	0.76176	0.794953	0.347991
Pp3c1_11990V3.1	Pp3c1_11990V1.1	Pp1s398_12V6.1		Pp1s398_12V2.1	Phypa_199964	Phpat.001G047200							ARATHwo_AT2G39340.1	SAC3/GANP/Nin1/mts3/eIF-3 p25 family; CONTAINS InterPro DOMAIN/s: SAC3/GANP/Nin1/mts3/eIF-3 p25 (InterPro:IPR005062); Has 35333 Blast hits to 34131 proteins in 2444 species: Archae - 798; Bacteria - 22429; Metazoa - 974; Fungi - 991; Plants - 531; Viruses - 0; Other Eukaryotes - 9610 (source: NCBI BLink).			gi|297736443|emb|CBI25314.3|	unnamed protein product, partial [Vitis vinifera].	FUNHY15tr_m240lflr_TR39012_c0_g2_i1_12_rc	leukocyte receptor cluster	leukocyte receptor cluster	GO:0005739	6.85766	8.65092	7.71993	6.4892	6.23248	6.20535	8.12168	7.44063	8.74373	9.03798	8.57629	7.60897	8.06575	9.86478	8.32259	8.02006	7.56499	7.51675
Pp3c1_12020V3.1	Pp3c1_12020V1.1	Pp1s398_15V6.1		Pp1s398_15V2.1:Pp1s398_15V2.2	Phypa_99786:Phypa_99787	Phpat.001G047300	0019427:0006631:0010498:0031348:0007010:0006094	0005524:0016208:0003987	0005829:0009570:0009514	acetyl-CoA biosynthetic process from acetate:fatty acid metabolic process:proteasomal protein catabolic process:negative regulation of defense response:cytoskeleton organization:gluconeogenesis	ATP binding:AMP binding:acetate-CoA ligase activity	cytosol:chloroplast stroma:glyoxysome					gi|727556625|ref|XP_010450452.1|	PREDICTED: acetyl-coenzyme A synthetase, chloroplastic/glyoxysomal-like isoform X1 [Camelina sativa].	PHYSPtr_m240lflr_YEPO_scaffold-YEPO-2009139-cf._Physcomicromitrium_sp._4	acetyl synthetase	acetyl synthetase	GO:0003987, GO:0009536, GO:0016208	16.5336	14.9861	15.4743	14.4589	14.5457	17.8293	14.1819	14.8651	16.0332	15.2176	14.9704	14.35	15.8894	17.4152	15.7017	16.7805	16.5267	16.4728
Pp3c1_12040V3.1	Pp3c1_12040V1.1	Pp1s398_16V6.1		Pp1s398_16V2.1	Phypa_99788																		0.534552	0.807588	0.201935	0.24735	0.208327	0.872255	7.49363	6.47963	3.69697	2.70304	2.87585	2.68946	1.22427	1.13854	1.53602	1.43509	0.74881	1.39311
Pp3c1_12070V3.1	Pp3c1_12070V1.1	Pp1s398_18V6.1		Pp1s398_18V2.1	Phypa_110619	Phpat.001G047400	0006913:0006886:0008152:0007264	0005525:0003924	0005622:0016020	nucleocytoplasmic transport:intracellular protein transport:metabolic process:small GTPase mediated signal transduction	GTP binding:GTPase activity	intracellular:membrane					gi|116783756|gb|ABK23074.1|	unknown [Picea sitchensis].	PHYSPtr_m240lflr_YEPO_scaffold-YEPO-2000740-cf._Physcomicromitrium_sp._3_rc	small gtpase rab2	small gtpase rab2	GO:0005524, GO:0005525, GO:0007264, GO:0008134, GO:0015031, GO:0016787	24.6197	25.0676	28.4062	21.2695	22.7341	24.4805	25.0306	22.5039	25.0344	22.1437	23.5092	24.8608	28.7048	28.4782	29.1375	29.7671	26.604	27.7466
Pp3c1_12080V3.1	Pp3c1_12080V1.1	Pp1s398_19V6.1		Pp1s398_19V2.1	Phypa_153687	Phpat.001G047500							ARATHwo_AT5G43920.1	transducin family protein / WD-40 repeat family protein; CONTAINS InterPro DOMAIN/s: WD40 repeat 2 (InterPro:IPR019782), WD40 repeat, conserved site (InterPro:IPR019775), WD40 repeat (InterPro:IPR001680), CTLH, C-terminal LisH motif (InterPro:IPR006595), G-protein beta WD-40 repeat, region (InterPro:IPR020472), WD40 repeat-like-containing domain (InterPro:IPR011046), WD40-repeat-containing domain…	sp|C4Q0P6|LIS1_SCHMA	Lissencephaly-1 homolog	gi|515883961|ref|WP_017314544.1|	hypothetical protein [Mastigocladopsis repens].	CERPUGG1tr_m240lflr_isotig15012_4	wd-40 repeat protein	wd-40 repeat protein	GO:0005515, GO:0008270	5.79385	6.82373	7.18744	5.28623	7.10904	6.19646	6.97171	5.60832	8.58415	9.04575	6.92312	6.9083	7.47013	9.14043	8.76651	8.24764	7.00344	7.75034
Pp3c1_120V3.1	Pp3c1_120V1.1	Pp1s283_20V6.1		Pp1s283_20V2.1	Phypa_8890				5840			ribosome	ARATHwo_AT3G05560.1	Ribosomal L22e protein family; FUNCTIONS IN: structural constituent of ribosome; INVOLVED IN: translation; LOCATED IN: cytosolic ribosome, ribosome, cytosolic large ribosomal subunit, nucleolus, plasma membrane; EXPRESSED IN: 22 plant structures; EXPRESSED DURING: 13 growth stages; CONTAINS InterPro DOMAIN/s: Ribosomal protein L22e (InterPro:IPR002671); BEST Arabidopsis thaliana protein match is:…	sp|Q9M9W1|RL222_ARATH	60S ribosomal protein L22-2	gi|116787822|gb|ABK24654.1|	unknown [Picea sitchensis].	PSEELtr_onekp_QKQO_1291	60s ribosomal protein	60s ribosomal protein	GO:0003735, GO:0005840, GO:0006412	240.171	266.654	255.263	244.288	228.32	208.45	174.795	219.755	215.234	210.278	227.933	194.639	218.434	223.211	202.462	214.637	177.857	205.9
Pp3c1_12100V3.1	Pp3c1_12100V1.1	Pp1s398_21V6.1		Pp1s398_21V2.1	Phypa_227125	Phpat.001G047600											gi|720014995|ref|XP_010260685.1|	PREDICTED: polygalacturonase QRT3 isoform X1 [Nelumbo nucifera].	TIMAUtr_onekp_ZQRI_2249	F18F4.150; expressed protein [Arabidopsis thaliana]:F18F4.150; expressed protein	F18F4.150; expressed protein [Arabidopsis thaliana]:F18F4.150; expressed protein	GO:0004650, GO:0005739, GO:0009556, GO:0010584, GO:0016020, GO:0044464	19.8962	18.8665	17.4136	20.0692	19.8719	19.2396	12.2973	13.3626	13.0161	21.1327	19.9843	13.1302	17.4594	18.9949	16.4009	26.7305	17.8423	20.4585
Pp3c1_12120V3.1	Pp3c1_12120V1.1	Pp1s398_22V6.1		Pp1s398_22V2.1	Phypa_110620	Phpat.001G047700											gi|731332454|ref|XP_010677215.1|	PREDICTED: ATP synthase subunit epsilon, mitochondrial [Beta vulgaris subsp. vulgaris].	FUNHY15tr_m240lflr_TR8375_c0_g1_i1_1	atp synthase epsilon mitochondrial	atp synthase epsilon mitochondrial	GO:0015078, GO:0015986, GO:0016787	29.2312	23.4939	34.0971	23.3486	34.4158	28.377	29.8489	23.0988	27.0693	21.4645	22.5182	27.0273	43.8985	39.241	49.4583	35.3402	38.8284	37.6151
Pp3c1_12130V3.1	Pp3c1_12130V1.1	Pp1s398_23V6.1		Pp1s398_23V2.1	Phypa_227130	Phpat.001G047800											gi|567890921|ref|XP_006437981.1|	hypothetical protein CICLE_v10033886mg [Citrus clementina].	PHYSPtr_onekp_YEPO_7914	at5g52420 k24m7_17	at5g52420 k24m7_17	GO:0016020	7.62053	4.9594	3.64938	41.8261	8.37053	19.3043	4.79831	3.57765	8.27459	6.39886	9.80227	13.3701	1.97484	1.26775	0.990831	2.04585	5.54277	3.55864									-2.64024
Pp3c1_12140V3.1	Pp3c1_12140V1.1	Pp1s398_23V6.1;Pp1s398_24V6.1		Pp1s398_24V2.1	Phypa_199981	Phpat.001G047900	6631	16874	5777	fatty acid metabolic process	ligase activity	peroxisome					gi|698530498|ref|XP_009762075.1|	PREDICTED: probable acyl-activating enzyme 17, peroxisomal isoform X1 [Nicotiana sylvestris].	PHYSPtr_m240lflr_YEPO_scaffold-YEPO-2081626-cf._Physcomicromitrium_sp._1	catalytic ligase	catalytic ligase	GO:0008152, GO:0016020, GO:0016023, GO:0016874	12.1748	11.0531	9.85825	9.92564	9.75996	13.0551	13.2523	12.5078	13.4619	21.9625	26.0402	14.5185	14.0972	11.4233	11.7009	17.7393	9.62988	15.9785
Pp3c1_12170V3.1	Pp3c1_12170V1.1	Pp1s398_25V6.1				Phpat.001G048100											gi|116788540|gb|ABK24915.1|	unknown [Picea sitchensis].	PHYSPtr_onekp_YEPO_77137				0.558243	1.12451	0.441235	0.536494	0.428426	0.458641	0.470513	0.553283	0.913804	1.13051	0.545367	0.714407	0.507604	0.506558	0.1742	0.749345	0.541382	0.421316
Pp3c1_12180V3.1	Pp3c1_12180V1.1																							0.409847	0.245954													0.273113		0.249529
Pp3c1_12190V3.1	Pp3c1_12190V1.1																		MONGOtr_m240lflr_TFDQ_scaffold-TFDQ-2094747-Monoclea_gottschei_1												0.279764
Pp3c1_12220V3.1	Pp3c1_12220V1.1		Pp1s398_30V6.1;Pp1s398_31V6.1;Pp1s398_32V6.1	Pp1s398_32V2.1	Phypa_153718	Phpat.001G048200											gi|727467131|ref|XP_010515439.1|	PREDICTED: acidic leucine-rich nuclear phosphoprotein 32-related protein-like [Camelina sativa].	PHYSPtr_onekp_YEPO_15885	acidic leucine-rich nuclear phosphoprotein 32 family member a	acidic leucine-rich nuclear phosphoprotein 32 family member a	GO:0005515, GO:0005737, GO:0043229, GO:0005634	0.819405	1.45298	0.920778	0.63015	1.15143	0.684796	1.50257	1.26785	1.39169	1.06712	0.960858	0.817558	1.30966	1.02862	1.04559	0.867535	1.05084	0.849238
Pp3c1_12230V3.1	Pp3c1_12230V1.1		Pp1s398_30V6.1;Pp1s398_31V6.1;Pp1s398_32V6.1	Pp1s398_32V2.1	Phypa_153718	Phpat.001G048300									sp|O35381|AN32A_MOUSE	Acidic leucine-rich nuclear phosphoprotein 32 family member A	gi|302784072|ref|XP_002973808.1|	hypothetical protein SELMODRAFT_442226 [Selaginella moellendorffii].	PHYSPtr_onekp_YEPO_15885	acidic leucine-rich nuclear phosphoprotein 32 family member a	acidic leucine-rich nuclear phosphoprotein 32 family member a	GO:0005515, GO:0005737, GO:0043229	1.23488	1.13913	0.920778	0.704913	1.35293	1.0135	0.996754	1.50264	1.55541	1.00784	0.928287	1.11485	1.2278	1.25552	1.48256	1.28581	1.18017	1.35878
Pp3c1_12270V3.1	Pp3c1_12270V1.1																		MONGOtr_m240lflr_TFDQ_scaffold-TFDQ-2094747-Monoclea_gottschei_1
Pp3c1_12280V3.1	Pp3c1_12280V1.1
Pp3c1_12290V3.1	Pp3c1_12290V1.1			Pp1s398_25V2.1	Phypa_172969	Phpat.001G048400											gi|802770554|ref|XP_012090649.1|	PREDICTED: SWI/SNF complex subunit SWI3A isoform X1 [Jatropha curcas].	PHYSPtr_onekp_YEPO_77137	putative glycin-rich protein [Oryza sativa (japonica cultivar-group)]	putative glycin-rich protein [Oryza sativa (japonica cultivar-group)]	GO:0009055, GO:0009507, GO:0009911	6.07688	10.4502	6.59015	8.77028	8.99192	7.83768	6.92669	7.0758	9.7022	12.9734	10.2297	7.2985	5.72819	7.76014	5.23159	5.77034	5.74806	6.9735
Pp3c1_12330V3.1	Pp3c1_12330V1.1					Phpat.001G048500	8152	16597		metabolic process	amino acid binding		ARATHwo_AT1G76990.1	ACT domain repeat 3 (ACR3); FUNCTIONS IN: amino acid binding; INVOLVED IN: nitrogen compound metabolic process, metabolic process; LOCATED IN: cytosol; EXPRESSED IN: 22 plant structures; EXPRESSED DURING: 13 growth stages; CONTAINS InterPro DOMAIN/s: Protein-PII uridylyltransferase (InterPro:IPR010043), Amino acid-binding ACT (InterPro:IPR002912); BEST Arabidopsis thaliana protein match is: ACT d…	sp|O49285|ACR3_ARATH	ACT domain-containing protein ACR3	gi|225457853|ref|XP_002268570.1|	PREDICTED: uncharacterized protein LOC100250578 isoform X3 [Vitis vinifera].	PHYSPtr_m240lflr_YEPO_scaffold-YEPO-2017859-cf._Physcomicromitrium_sp._8_rc				10.2914	10.2233	5.66319	6.33268	4.65233	7.16824	5.80133	6.41264	6.73849	5.20859	5.38662	5.6918	5.73007	6.92217	6.26156	5.53158	7.20057	5.47951
Pp3c1_12340V3.1	Pp3c1_12340V1.1														sp|Q96LW4|PRIPO_HUMAN	DNA-directed primase/polymerase protein	gi|604306097|gb|EYU25154.1|	hypothetical protein MIMGU_mgv1a003719mg [Erythranthe guttata].	PHYSPtr_m240lflr_YEPO_scaffold-YEPO-2010060-cf._Physcomicromitrium_sp._2				8.11502	7.30526	5.4668	5.45776	5.94178	5.49318	4.63118	5.96273	5.98982	5.11127	4.85111	4.76042	3.2395	5.02629	4.28195	4.09463	4.54435	3.70542
Pp3c1_12350V3.1
Pp3c1_12370V3.1	Pp3c1_12370V1.1	Pp1s527_2V6.1;Pp1s527_3V6.1	Pp1s728_1V6.1;Pp1s728_2V6.1	Pp1s527_3V2.1:Pp1s728_1V2.1	Phypa_173651:Phypa_157210	Phpat.001G048700	8152	0003676:0005524:0004386		metabolic process	nucleic acid binding:ATP binding:helicase activity		ARATHwo_AT2G42520.1	P-loop containing nucleoside triphosphate hydrolases superfamily protein; FUNCTIONS IN: helicase activity, nucleic acid binding, ATP binding, ATP-dependent helicase activity; LOCATED IN: peroxisome; EXPRESSED IN: 24 plant structures; EXPRESSED DURING: 15 growth stages; CONTAINS InterPro DOMAIN/s: RNA helicase, DEAD-box type, Q motif (InterPro:IPR014014), DNA/RNA helicase, DEAD/DEAH box type, N-te…	sp|Q0DB53|RH52A_ORYSJ	DEAD-box ATP-dependent RNA helicase 52A	gi|658028184|ref|XP_008349521.1|	PREDICTED: DEAD-box ATP-dependent RNA helicase 20-like isoform X1 [Malus domestica].	FUNHY15tr_m240lflr_TR79_c0_g1_i1_20_rc	DBP2; DEAD box RNA helicase:ATP-dependent RNA helicase DBP2	DBP2; DEAD box RNA helicase:ATP-dependent RNA helicase DBP2	GO:0003676, GO:0005524, GO:0008026, GO:0003676, GO:0005524, GO:0008026	3.88876	3.29483	4.34736	3.60887	4.62007	3.76648	4.17504	3.45246	4.30286	3.92291	4.0507	3.60423	4.92973	5.66496	5.112	3.14072	4.49149	4.13157
Pp3c1_12380V3.1	Pp3c1_12380V1.1		Pp1s728_1V6.1;Pp1s728_2V6.1				8152	0003676:0005524:0004386		metabolic process	nucleic acid binding:ATP binding:helicase activity						gi|657985115|ref|XP_008384660.1|	PREDICTED: DEAD-box ATP-dependent RNA helicase 20-like isoform X1 [Malus domestica].	PLAAStr_onekp_NWQC_153763	ATP-dependent RNA helicase DBP2	ATP-dependent RNA helicase DBP2	GO:0003676, GO:0005524, GO:0008026	2.73343	2.47776	1.75728	1.52928	1.8439	1.9463	1.90592	1.80307	2.20331	1.62752	1.57795	1.57362	2.15898	2.37763	2.65454	1.80122	1.96673	1.87425
Pp3c1_1240V3.1	Pp3c1_1240V1.1	Pp1s200_83V6.1		Pp1s200_83V2.1	Phypa_143247	Phpat.001G005500	0006412:0071840:0048513:0065007	3735	0005840:0009507	translation:cellular component organization or biogenesis:organ development:biological regulation	structural constituent of ribosome	ribosome:chloroplast	ARATHwo_AT1G48350.1	Ribosomal L18p/L5e family protein; FUNCTIONS IN: structural constituent of ribosome; INVOLVED IN: translation, ribosome biogenesis; LOCATED IN: ribosome, chloroplast, chloroplast envelope; EXPRESSED IN: 22 plant structures; EXPRESSED DURING: 13 growth stages; CONTAINS InterPro DOMAIN/s: Ribosomal protein L18/L5 (InterPro:IPR005484), Ribosomal protein L18, bacterial (InterPro:IPR004389); BEST Arab…	sp|Q9SX68|RK18_ARATH	50S ribosomal protein L18, chloroplastic	gi|596288596|ref|XP_007225963.1|	hypothetical protein PRUPE_ppa012509mg [Prunus persica].	PHYSPtr_m240lflr_YEPO_scaffold-YEPO-2014064-cf._Physcomicromitrium_sp._1	ribosomal protein l18	ribosomal protein l18	GO:0003723, GO:0003735, GO:0005840, GO:0006412, GO:0009536	14.8222	14.9708	14.6876	10.9351	12.4188	12.0404	10.1992	10.9009	11.3136	8.92775	8.83779	10.397	12.7583	12.8332	12.9009	10.957	14.1249	12.5968
Pp3c1_12420V3.1	Pp3c1_12420V1.1					Phpat.001G048900													XENTR_2158
Pp3c1_12440V3.1	Pp3c1_12440V1.1	Pp1s556_3V6.1											ARATHwo_AT4G26570.2	member of AtCBLs (Calcineurin B-like Calcium Sensor Proteins)	sp|Q8LEM7|CNBL3_ARATH	Calcineurin B-like protein 3	gi|565358593|ref|XP_006346111.1|	PREDICTED: calcineurin B-like protein 3-like [Solanum tuberosum].	SCOAQtr_onekp_BPSG_21731						0.0922329				0.393412	0.206961	0.216484		0.215334			0.100005				0.0935734
Pp3c1_12470V3.1	Pp3c1_12470V1.1	Pp1s556_1V6.1		Pp1s556_1V2.1	Phypa_156552	Phpat.001G049000											gi|255539368|ref|XP_002510749.1|	conserved hypothetical protein [Ricinus communis].	PHYSPtr_onekp_YEPO_80682	F4P9.34; expressed protein [Arabidopsis thaliana]			0.149311	0.0546849			0.0338559	0.0483249	0.0174973	0.0552286				0.0437073					0.114086	0.0832351
Pp3c1_12560V3.1	Pp3c1_12560V1.1	Pp1s86_237V6.1				Phpat.001G049400	6281			DNA repair			ARATHwo_AT2G25320.1	TRAF-like family protein; LOCATED IN: chloroplast; CONTAINS InterPro DOMAIN/s: TRAF-like (InterPro:IPR008974), MATH (InterPro:IPR002083); BEST Arabidopsis thaliana protein match is: TRAF-like family protein (TAIR:AT2G25330.1); Has 73652 Blast hits to 40883 proteins in 2342 species: Archae - 900; Bacteria - 9328; Metazoa - 35691; Fungi - 5783; Plants - 4303; Viruses - 204; Other Eukaryotes - 17443…			gi|566213752|ref|XP_006371753.1|	hypothetical protein POPTR_0018s01920g [Populus trichocarpa].	RACVAtr_onekp_RDOO_119950			GO:0003824, GO:0009058, GO:0030170	5.31684	5.64561	5.76292	4.89502	8.44686	4.79336	6.74746	6.92222	9.23853	11.4506	9.33481	7.32143	8.35552	8.26536	8.4714	8.46474	8.53528	7.96969
Pp3c1_12600V3.1	Pp3c1_12600V1.1	Pp1s86_235V6.1																	PHYSPtr_m240lflr_YEPO_scaffold-YEPO-2072770-cf._Physcomicromitrium_sp._1
Pp3c1_1260V3.1	Pp3c1_1260V1.1	Pp1s200_79V6.1		Pp1s200_79V2.1	Phypa_220835	Phpat.001G005600	15992		0005773:0016023:0033177	proton transport		vacuole:cytoplasmic membrane-bounded vesicle:proton-transporting two-sector ATPase complex, proton-transporting domain					gi|115461633|ref|NP_001054416.1|	Os05g0106100 [Oryza sativa Japonica Group].	TIMAUtr_onekp_ZQRI_1583	vacuolar atp synthase 16 kda proteolipid subunit	vacuolar atp synthase 16 kda proteolipid subunit	GO:0015078, GO:0015986, GO:0016020, GO:0016021, GO:0016023, GO:0033179	18.606	14.6949	15.856	12.0586	12.0703	11.7601	17.6902	14.7725	19.6329	15.7688	17.2047	14.5747	19.5006	21.9257	20.1979	19.5072	16.31	17.4329
Pp3c1_12610V3.1	Pp3c1_12610V1.1	Pp1s86_233V6.1;Pp1s86_234V6.1		Pp1s86_234V2.1	Phypa_233516	Phpat.001G049600	9231	8686		riboflavin biosynthetic process	3,4-dihydroxy-2-butanone-4-phosphate synthase activity				sp|Q7A511|RIBBA_STAAN	Riboflavin biosynthesis protein RibBA	gi|471674501|gb|EMR74102.1|	3,4-dihydroxy-2-butanone 4-phosphate synthase [Thermoplasmatales archaeon SCGC AB-539-N05].	PHYSPtr_onekp_YEPO_16547	-dihydroxy-2-butanone 4-phosphate synthase	-dihydroxy-2-butanone 4-phosphate synthase	GO:0009231	19.4148	17.5132	27.25	25.3071	39.7197	25.7419	20.1892	14.082	18.5633	19.4388	19.2766	27.176	26.3804	26.7261	28.7567	24.5498	33.0846	23.9641
Pp3c1_12620V3.1	Pp3c1_12620V1.1	Pp1s86_233V6.1				Phpat.001G049700																		0.0732147
Pp3c1_12630V3.1	Pp3c1_12630V1.1	Pp1s86_232V6.1		Pp1s86_232V2.1	Phypa_43007	Phpat.001G049800	0043248:0006457	44183		proteasome assembly:protein folding	protein binding involved in protein folding		ARATHwo_AT3G15180.2	ARM repeat superfamily protein; FUNCTIONS IN: binding; INVOLVED IN: biological_process unknown; EXPRESSED IN: 22 plant structures; EXPRESSED DURING: 11 growth stages; CONTAINS InterPro DOMAIN/s: Armadillo-type fold (InterPro:IPR016024), 26S proteasome non-ATPase regulatory subunit 5 (InterPro:IPR019538).	sp|Q8BJY1|PSMD5_MOUSE	26S proteasome non-ATPase regulatory subunit 5	gi|769794283|ref|XP_011628814.1|	PREDICTED: uncharacterized protein LOC18448936 [Amborella trichopoda].	PHYSPtr_m240lflr_YEPO_scaffold-YEPO-2080607-cf._Physcomicromitrium_sp._7_rc	26s proteasome non-atpase regulatory	26s proteasome non-atpase regulatory	GO:0005488, GO:0005886	11.8969	15.9305	14.4526	15.0004	10.706	12.1879	17.8876	17.1189	15.7378	15.228	15.4606	16.4929	13.4375	13.4355	14.0466	14.0753	12.2726	14.4464
Pp3c1_12640V3.1
Pp3c1_12650V3.1	Pp3c1_12650V1.1
Pp3c1_12670V3.1	Pp3c1_12670V1.1	Pp1s86_228V6.1																					0.802012	0.510172	0.969508	0.93754	0.421136	0.901675	0.816189	0.91599	0.838372	0.379461	0.536088	0.860824	0.399174	0.995878	0.684946	0.96324	1.12347	0.724758
Pp3c1_12690V3.1	Pp3c1_12690V1.1	Pp1s86_226V6.1																					1.15034	2.48273	0.397311	0.304166	0.819776	1.17012	1.27102		0.466274	0.422086	0.463795			0.215395	0.222217	0.220591		0.201543
Pp3c1_12700V3.1	Pp3c1_12700V1.1	Pp1s86_224V6.1		Pp1s86_224V2.1	Phypa_233514		0022402:0010431:0009628:0009933:0009908:0050793:0048366:0050794:0009793		44424	cell cycle process:seed maturation:response to abiotic stimulus:meristem structural organization:flower development:regulation of developmental process:leaf development:regulation of cellular process:embryo development ending in seed dormancy		intracellular part					gi|764607463|ref|XP_011467203.1|	PREDICTED: DDB1- and CUL4-associated factor homolog 1 [Fragaria vesca subsp. vesca].	CLAROtr_onekp_VBMM_54635	mkiaa0800 protein	mkiaa0800 protein	GO:0005515
Pp3c1_12703V3.1		Pp1s86_224V6.1					0010162:0045595:0010564:0009845:0009880:0009909:0009640:0010072:0051301:0010228:0016567:0019915:0007062:0050826:0048825:0010182		0080008:0005634	seed dormancy process:regulation of cell differentiation:regulation of cell cycle process:seed germination:embryonic pattern specification:regulation of flower development:photomorphogenesis:primary shoot apical meristem specification:cell division:vegetative to reproductive phase transition of meristem:protein ubiquitination:lipid storage:sister chromatid cohesion:response to freezing:cotyledon …		Cul4-RING E3 ubiquitin ligase complex:nucleus					gi|297802916|ref|XP_002869342.1|	transducin family protein [Arabidopsis lyrata subsp. lyrata].	FUNHY15tr_m240lflr_TR9492_c0_g4_i1_8				0.00587089		0.007097	0.0162996	0.0146433					0.00753956
Pp3c1_1270V3.1	Pp3c1_1270V1.1	Pp1s200_78V6.1		Pp1s200_78V2.1	Phypa_59890	Phpat.001G005700	6508	4185		proteolysis	serine-type carboxypeptidase activity						gi|225451745|ref|XP_002280058.1|	PREDICTED: serine carboxypeptidase-like 25 [Vitis vinifera].	PHYSPtr_onekp_YEPO_17012	serine carboxypeptidase ii	serine carboxypeptidase ii	GO:0004185, GO:0006508, GO:0016020, GO:0016023	17.5561	19.0881	17.4914	16.9204	15.1275	17.3347	17.6637	15.4383	19.384	16.8906	14.3151	15.4884	18.1034	20.3311	17.5988	20.0562	16.1382	19.2888
Pp3c1_12710V3.1	Pp3c1_12710V1.1	Pp1s86_223V6.1		Pp1s86_223V2.1	Phypa_229897												gi|302815737|ref|XP_002989549.1|	hypothetical protein SELMODRAFT_428089 [Selaginella moellendorffii].	FUNHY15tr_m240lflr_TR22220_c0_g1_i1_1				0.262871	0.226937	0.453959	0.20852	0.140499	0.0891304	0.290449	0.101864	0.426204	0.0964534	0.317953	0.282148	0.532687	1.03365	0.660141	0.655311	0.21042	0.506612
Pp3c1_12715V3.1		Pp1s86_222V6.1																	ATRANtr_onekp_ZTHV_5803				0.797808	1.88258	1.21242	1.01257	0.625401	0.865627	2.43883	2.96787	2.97509	2.22477	2.60545	2.42214	3.17949	4.30229	4.31525	2.23363	1.97972	2.46009
Pp3c1_12730V3.1	Pp3c1_12730V1.1	Pp1s86_219V6.1				Phpat.001G050000													CERPUR40tr_m240lflr_isotig09712_1				7.98573	5.78484	16.1139	4.20682	11.836	6.56091	7.52259	9.78933	9.89119	6.66607	6.97805	8.37353	10.892	13.124	13.7473	12.1212	8.77714	10.5849
Pp3c1_12740V3.1	Pp3c1_12740V1.1	Pp1s86_218V6.1		Pp1s86_218V2.1	Phypa_131126	Phpat.001G050100			5829			cytosol					gi|18407200|ref|NP_566090.1|	uncharacterized protein [Arabidopsis thaliana].	FUNHY15tr_m240lflr_TR12611_c0_g2_i2_2	novel protein (zgc:101131):nulp1 isoform 3	novel protein (zgc:101131):nulp1 isoform 3	GO:0005488, GO:0009536, GO:0045449	4.46164	5.57783	4.82769	3.65259	3.46301	2.98061	4.18277	4.23158	4.75827	4.56778	4.38075	4.10231	5.32932	6.44089	6.28627	5.71676	4.23947	5.3953
Pp3c1_12750V3.1	Pp3c1_12750V1.1	Pp1s86_217V6.1		Pp1s86_217V2.1	Phypa_233511	Phpat.001G050200	32259	8168		methylation	methyltransferase activity						gi|778696694|ref|XP_011654192.1|	PREDICTED: probable 28S rRNA (cytosine-C(5))-methyltransferase isoform X2 [Cucumis sativus].	FUNHY15tr_m240lflr_TR27586_c0_g1_i1_6_rc	williams-beuren syndrome critical region	williams-beuren syndrome critical region	GO:0009536	11.7315	13.8019	13.2329	9.81402	9.53617	9.86246	9.85691	9.79768	10.7624	8.83797	8.57548	9.99999	9.01508	9.23123	9.33312	8.40047	8.93564	8.29205
Pp3c1_12760V3.1	Pp3c1_12760V1.1																		BUXAPtr_onekp_HRWG_65892					0.097313
Pp3c1_12790V3.1	Pp3c1_12790V1.1	Pp1s86_214V6.1		Pp1s86_214V2.1	Phypa_233510	Phpat.001G050300											gi|698463592|ref|XP_009782253.1|	PREDICTED: protein EARLY FLOWERING 3-like isoform X1 [Nicotiana sylvestris].	PHYSPtr_m240lflr_YEPO_scaffold-YEPO-2017010-cf._Physcomicromitrium_sp._10_rc	early flowering 3			1.91238	2.44669	2.23888	1.97708	3.5452	2.61705	1.03271	1.93943	2.35863	1.37178	1.87201	2.07111	3.27886	2.70981	4.14686	2.4861	2.54616	2.65175
Pp3c1_12800V3.1	Pp3c1_12800V1.1	Pp1s86_213V6.1		Pp1s86_213V2.1	Phypa_131034	Phpat.001G050400	0009628:0005975:0006950	8184	9507	response to abiotic stimulus:carbohydrate metabolic process:response to stress	glycogen phosphorylase activity	chloroplast	ARATHwo_AT3G29320.1	Encodes a plastidic alpha-glucan phosphorylase. In vitro, the enzyme has a preference for maltooligosaccharides, such as maltoheptaose.	sp|P53536|PHSL_VICFA	Alpha-1,4 glucan phosphorylase L isozyme, chloroplastic/amyloplastic	gi|548839671|gb|ERM99931.1|	hypothetical protein AMTR_s00110p00094310 [Amborella trichopoda].	PHYSPtr_m240lflr_YEPO_scaffold-YEPO-2006984-cf._Physcomicromitrium_sp._10_rc	alpha- glucan phosphorylase	alpha- glucan phosphorylase	GO:0004645, GO:0005975, GO:0009536, GO:0019079, GO:0030170, GO:0042802	8.08467	15.0247	7.96036	3.74097	0.520387	7.58258	36.5429	33.107	21.0706	18.5546	19.3577	18.6847	11.2214	11.1094	11.8668	14.7381	8.34773	18.535				-1.40858			1.54616
Pp3c1_12810V3.1	Pp3c1_12810V1.1	Pp1s86_212V6.1		Pp1s86_212V2.1	Phypa_233509	Phpat.001G050500	19243		9507	methylglyoxal catabolic process to D-lactate		chloroplast					gi|697185555|ref|XP_009601813.1|	PREDICTED: uncharacterized protein LOC104097018 [Nicotiana tomentosiformis].	PHYSPtr_m240lflr_YEPO_scaffold-YEPO-2073206-cf._Physcomicromitrium_sp._2_rc				61.1905	47.2029	56.1892	46.5306	50.6545	53.9631	56.2618	43.8095	40.9837	42.6555	45.921	53.6565	65.7975	54.1827	65.5835	53.8121	55.7529	57.4185
Pp3c1_12820V3.1	Pp3c1_12820V1.1	Pp1s86_211V6.1		Pp1s86_211V2.1	Phypa_229888														PHYSPtr_m240lflr_YEPO_scaffold-YEPO-2077874-cf._Physcomicromitrium_sp._4_rc			GO:0016020	10.3766	10.1096	8.52642	7.28068	3.46778	11.7508	37.4178	24.2834	24.4387	19.5969	22.9689	27.7346	14.1098	12.3562	12.9309	14.0198	11.0205	21.21				-1.12949			1.57019
Pp3c1_12830V3.1	Pp3c1_12830V1.1	Pp1s86_210V6.1		Pp1s86_210V2.1	Phypa_233508	Phpat.001G050700	0045893:0006406:0016579:0016571:0010388:0009640:0009560:0016567:0010074:0009909:0006606		5634	positive regulation of transcription, DNA-templated:mRNA export from nucleus:protein deubiquitination:histone methylation:cullin deneddylation:photomorphogenesis:embryo sac egg cell differentiation:protein ubiquitination:maintenance of meristem identity:regulation of flower development:protein import into nucleus		nucleus			sp|Q8C1Z7|BBS4_MOUSE	Bardet-Biedl syndrome 4 protein homolog	gi|674233176|gb|KFK25941.1|	hypothetical protein AALP_AA8G182900 [Arabis alpina].	PHYSPtr_m240lflr_YEPO_scaffold-YEPO-2081296-cf._Physcomicromitrium_sp._1	tetratricopeptide repeat domain 27	tetratricopeptide repeat domain 27	GO:0005488	16.4153	19.2341	16.9825	15.8948	16.2203	18.0632	14.5127	13.5024	17.2811	17.7906	15.4427	15.7313	17.8513	18.5274	17.3085	16.6135	14.9497	16.6701
Pp3c1_12850V3.1	Pp3c1_12850V1.1	Pp1s86_207V6.1		Pp1s86_207V2.1	Phypa_185792	Phpat.001G050800	1901701:0048519:0043067:0071310:0071229:0034976:0007165:0009607:0006952		0043231:0005737:0016021:0012505	cellular response to oxygen-containing compound:negative regulation of biological process:regulation of programmed cell death:cellular response to organic substance:cellular response to acid chemical:response to endoplasmic reticulum stress:signal transduction:response to biotic stimulus:defense response		intracellular membrane-bounded organelle:cytoplasm:integral component of membrane:endomembrane system					gi|183447473|gb|ACC62519.1|	Bax inhibitor [Capsicum annuum].	PHYSPtr_onekp_YEPO_78346	bax inhibitor-1:bax inhibitor	bax inhibitor-1:bax inhibitor	GO:0005576, GO:0005618, GO:0005783, GO:0009536, GO:0016020, GO:0016021, GO:0043066	101.201	95.9304	114.962	168.225	93.4684	125.743	173.565	153.852	225.274	246.314	251.746	204.812	164.225	177.004	163.853	194.434	194.564	163.616
Pp3c1_12860V3.1	Pp3c1_12860V1.1	Pp1s86_206V6.1		Pp1s86_206V2.1	Phypa_131040	Phpat.001G050900	6412	3735	0005840:0044435:0009507	translation	structural constituent of ribosome	ribosome:plastid part:chloroplast					gi|727510744|ref|XP_010431660.1|	PREDICTED: 30S ribosomal protein S17, chloroplastic-like, partial [Camelina sativa].	PHYSPtr_m240lflr_YEPO_scaffold-YEPO-2076886-cf._Physcomicromitrium_sp._2	ribosomal protein s17	ribosomal protein s17	GO:0003735, GO:0005840, GO:0006412, GO:0009536	61.3079	40.7282	55.6822	45.587	69.1111	54.9795	55.3321	53.72	28.8519	29.6533	37.1368	49.2813	53.4344	40.2366	48.3961	37.3925	67.1789	49.412
Pp3c1_12890V3.1	Pp3c1_12890V1.1	Pp1s86_201V6.1;Pp1s86_202V6.1		Pp1s86_201V2.1	Phypa_185788	Phpat.001G051000	9058	16844		biosynthetic process	strictosidine synthase activity						gi|460373491|ref|XP_004232552.1|	PREDICTED: protein YLS2 [Solanum lycopersicum].	PHYSPtr_m240lflr_YEPO_scaffold-YEPO-2079745-cf._Physcomicromitrium_sp._4_rc	adipocyte plasma membrane-associated	adipocyte plasma membrane-associated	GO:0005773, GO:0009536, GO:0016020, GO:0016844	15.7184	13.4754	14.9739	7.90468	10.0776	14.4265	26.2469	24.2024	18.9305	19.6854	21.0304	20.5611	16.2971	14.7723	15.2881	15.4617	20.7775	21.1681
Pp3c1_1290V3.1	Pp3c1_1290V1.1	Pp1s200_74V6.1				Phpat.001G005800	0009086:0006508:0000394	0004180:0008236	0009507:0005773	methionine biosynthetic process:proteolysis:RNA splicing, via endonucleolytic cleavage and ligation	carboxypeptidase activity:serine-type peptidase activity	chloroplast:vacuole	ARATHwo_AT5G65760.1	Serine carboxypeptidase S28 family protein; FUNCTIONS IN: serine-type peptidase activity; INVOLVED IN: proteolysis; LOCATED IN: chloroplast, vacuole; EXPRESSED IN: 23 plant structures; EXPRESSED DURING: 13 growth stages; CONTAINS InterPro DOMAIN/s: Peptidase S28 (InterPro:IPR008758); BEST Arabidopsis thaliana protein match is: alpha/beta-Hydrolases superfamily protein (TAIR:AT2G24280.1); Has 3020…	sp|Q2TA14|PCP_BOVIN	Lysosomal Pro-X carboxypeptidase	gi|802646151|ref|XP_012079471.1|	na	PHYSPtr_m240lflr_YEPO_scaffold-YEPO-2081221-cf._Physcomicromitrium_sp._6_rc				13.7496	14.3491	11.4607	12.6769	11.5242	13.9976	13.2157	12.7653	12.2339	13.5184	12.4834	11.3536	12.3418	14.1567	12.1246	15.0045	9.8465	14.1714
Pp3c1_12911V3.1		Pp1s86_199V6.1;Pp1s86_200V6.1																	PHYSPtr_m240lflr_YEPO_scaffold-YEPO-2079461-cf._Physcomicromitrium_sp._2				4.1372	2.39442	4.62801	2.35726	3.40762	3.33421	7.00466	6.26018	7.68707	7.19648	8.51756	7.32366	3.39414	5.22033	4.38368	4.78677	2.74636	4.86567
Pp3c1_12940V3.1	Pp3c1_12940V1.1	Pp1s86_197V6.1		Pp1s86_197V2.1	Phypa_131143	Phpat.001G051300	0009987:0044767	46872		cellular process:single-organism developmental process	metal ion binding						gi|595864864|ref|XP_007211846.1|	hypothetical protein PRUPE_ppa004704mg [Prunus persica].	PHYSPtr_m240lflr_YEPO_scaffold-YEPO-2010269-cf._Physcomicromitrium_sp._5	floral homeotic protein hua1	floral homeotic protein hua1	GO:0003676, GO:0004518, GO:0005634, GO:0008270	32.2281	29.5186	27.1367	24.5066	19.441	27.1168	36.6049	32.4785	29.414	31.7058	30.0861	25.4212	22.171	28.5931	24.9235	29.4073	19.6728	26.11
Pp3c1_12950V3.1	Pp3c1_12950V1.1	Pp1s86_196V6.1		Pp1s86_196V2.1	Phypa_229881	Phpat.001G051400	6886		0016021:0005783	intracellular protein transport		integral component of membrane:endoplasmic reticulum					gi|502145996|ref|XP_004506274.1|	PREDICTED: B-cell receptor-associated protein 31 [Cicer arietinum].	PHYSPtr_onekp_YEPO_79209			GO:0005783, GO:0006886, GO:0016020, GO:0016021	8.35416	6.74402	7.89135	5.49741	5.10458	5.67944	6.30447	6.74702	8.78464	6.87388	6.0425	6.39841	8.63465	9.76686	8.77054	8.1992	6.08656	7.46544
Pp3c1_12960V3.1	Pp3c1_12960V1.1
Pp3c1_12990V3.1	Pp3c1_12990V1.1	Pp1s86_189V6.1		Pp1s86_189V2.1	Phypa_213150	Phpat.001G051500	0016192:0006886:0008152	0016740:0005198	30126	vesicle-mediated transport:intracellular protein transport:metabolic process	transferase activity:structural molecule activity	COPI vesicle coat	ARATHwo_AT1G52360.2	Coatomer, beta' subunit; FUNCTIONS IN: structural molecule activity; INVOLVED IN: intracellular protein transport, vesicle-mediated transport; LOCATED IN: membrane coat, COPI vesicle coat; EXPRESSED IN: 24 plant structures; EXPRESSED DURING: 13 growth stages; CONTAINS InterPro DOMAIN/s: WD40 repeat 2 (InterPro:IPR019782), Coatomer, WD associated region (InterPro:IPR006692), Cytochrome cd1-nitrite…	sp|Q5VQ78|COB21_ORYSJ	Coatomer subunit beta'-1	gi|641830401|gb|KDO49490.1|	hypothetical protein CISIN_1g000933mg [Citrus sinensis].	AULHEtr_onekp_WNGH_6599	coatomer alpha	coatomer alpha	GO:0005198, GO:0005515, GO:0005615, GO:0005625, GO:0005739, GO:0005792, GO:0006886, GO:0006888, GO:0016905, GO:0030126, GO:0080008	16.4855	20.9439	21.4334	22.0144	20.1849	23.0532	15.5027	13.0535	20.594	20.8649	17.9676	17.6849	22.0548	22.8923	23.5338	24.0016	22.4871	20.3155
Pp3c1_1300V3.1	Pp3c1_1300V1.1	Pp1s200_73V6.1		Pp1s200_73V2.1	Phypa_90712	Phpat.001G005900	6355	3677		regulation of transcription, DNA-templated	DNA binding								PHYSPtr_onekp_YEPO_69773	T17D12.7; Dof-type zinc finger domain-containing protein	T17D12.7; Dof-type zinc finger domain-containing protein	GO:0003677, GO:0003700, GO:0005634, GO:0008270, GO:0045449	0.103164		0.0623546	0.358023	0.0643285	0.459102	0.16623	0.0699587	0.219534	0.132486	0.181972	0.138411	0.182921	0.135218	0.174376	0.24234	0.216771	0.284674
Pp3c1_13010V3.1	Pp3c1_13010V1.1	Pp1s86_187V6.1		Pp1s86_187V2.1	Phypa_17473	Phpat.001G051600	0000079:0006355	19901	5634	regulation of cyclin-dependent protein serine/threonine kinase activity:regulation of transcription, DNA-templated	protein kinase binding	nucleus					gi|823245164|ref|XP_012455251.1|	PREDICTED: cyclin-T1-4 [Gossypium raimondii].	PHYSPtr_m240lflr_YEPO_scaffold-YEPO-2000298-cf._Physcomicromitrium_sp._6_rc	K18C1.7; cyclin family	K18C1.7; cyclin family	GO:0005634, GO:0009615, GO:0009908, GO:0010090, GO:0050792, GO:0051726	24.5458	24.8357	23.0995	17.1204	18.063	18.9554	23.5999	20.929	19.9717	19.3828	21.4891	17.3015	21.3479	22.4143	21.309	18.4881	16.1018	17.279
Pp3c1_13020V3.1	Pp3c1_13020V1.1	Pp1s86_182V6.1;Pp1s86_186V6.1		Pp1s86_182V2.1	Phypa_131035	Phpat.001G051800	0019243:0001522:0008033	0009982:0003723		methylglyoxal catabolic process to D-lactate:pseudouridine synthesis:tRNA processing	pseudouridine synthase activity:RNA binding				sp|A1UUB6|TRUA_BARBK	tRNA pseudouridine synthase A	gi|658025028|ref|XP_008347917.1|	PREDICTED: tRNA pseudouridine synthase-like 1 isoform X1 [Malus domestica].	FUNHY15tr_m240lflr_TR44983_c0_g2_i2_12_rc	trna pseudouridine synthase a	trna pseudouridine synthase a	GO:0001522, GO:0003723, GO:0008033, GO:0009982	5.60371	5.47742	7.52916	5.42398	6.09486	5.12383	4.9262	4.85909	7.40246	6.34703	5.65197	6.34989	6.08107	7.32077	7.22965	6.38755	5.48198	6.15144
Pp3c1_13030V3.1	Pp3c1_13030V1.1	Pp1s86_186V6.1		Pp1s86_186V2.1	Phypa_185775		8152	0016887:0005524		metabolic process	ATPase activity:ATP binding		ARATHwo_AT1G64550.1	Encodes a member of GCN subfamily. Predicted to be involved in stress-associated protein translation control. The mutant is affected in MAMP ((microbe-associated molecular patterns)-induced stomatal closure, but not other MAMP-induced responses in the leaves.	sp|Q8H0V6|AB3F_ARATH	ABC transporter F family member 3	gi|565393585|ref|XP_006362455.1|	PREDICTED: ABC transporter F family member 4-like [Solanum tuberosum].	FUNHY15tr_m240lflr_TR44983_c0_g2_i1_2	abc transporter	abc transporter	GO:0003918, GO:0005524, GO:0005739, GO:0006265, GO:0009536, GO:0015416, GO:0043190	7.8494	11.2544	10.0876	8.10982	8.49852	6.8328	7.84774	8.64508	10.2142	9.34523	8.45109	8.75586	8.78408	10.3749	10.5099	9.28036	8.54355	8.15495
Pp3c1_13050V3.1	Pp3c1_13050V1.1	Pp1s86_180V6.1		Pp1s86_180V2.1	Phypa_233499	Phpat.001G051900	0001933:0006446	5515		negative regulation of protein phosphorylation:regulation of translational initiation	protein binding						gi|530577795|ref|XP_005282840.1|	PREDICTED: protein IMPACT isoform X2 [Chrysemys picta bellii].	PHYSPtr_m240lflr_YEPO_scaffold-YEPO-2079562-cf._Physcomicromitrium_sp._5_rc	imprinted and ancient			13.1287	13.1547	14.0275	12.1969	10.6477	14.2332	8.97499	11.5566	17.4477	16.0553	14.6059	11.7641	10.1525	12.8782	10.4685	12.1656	8.82763	10.2217
Pp3c1_13060V3.1	Pp3c1_13060V1.1	Pp1s86_178V6.1;Pp1s86_179V6.1		Pp1s86_178V2.1	Phypa_185771	Phpat.001G052000	5975	0030246:0004553		carbohydrate metabolic process	carbohydrate binding:hydrolase activity, hydrolyzing O-glycosyl compounds		ARATHwo_AT5G63840.1	radial swelling mutant shown to be specifically impaired in cellulose production. Encodes the alpha-subunit of a glucosidase II enzyme.	sp|A1CNK4|AGDC_ASPCL	Probable alpha/beta-glucosidase agdC	gi|17484113|gb|AAL40352.1|AF448201_1	putative alpha-xylosidase [Pinus pinaster].	FUNHY15tr_m240lflr_TR51373_c0_g1_i1_13_rc	F24J5.20; alpha-xylosidase (XYL1) [Arabidopsis thaliana]:F24J5.20; alpha-xylosidase (XYL1)	F24J5.20; alpha-xylosidase (XYL1) [Arabidopsis thaliana]:F24J5.20; alpha-xylosidase (XYL1)	GO:0016020, GO:0005737, GO:0005975, GO:0016023, GO:0016798	1.05078	1.85207	1.2458	3.77754	4.87633	1.223	5.13151	3.37098	5.60448	8.20041	10.9355	4.31612	1.51679	1.57591	0.724103	2.25135	1.03319	2.47825
Pp3c1_13080V3.1	Pp3c1_13080V1.1	Pp1s86_175V6.1		Pp1s86_175V2.1	Phypa_229873																		3.71086	4.53842	3.0563	8.15153	2.51736	3.84726	2.0238	2.074	2.02481	2.35661	3.85545	3.30457	1.75943	1.14916	1.98511	3.01061	2.82762	2.32554
Pp3c1_1310V3.1	Pp3c1_1310V1.1	Pp1s200_72V6.1		Pp1s200_72V2.1	Phypa_193580	Phpat.001G006000	0006635:0006891:0006869:0007032:0010351:0006623:0016558:0007033:0016197:0010091	0017111:0005524	0005771:0009506:0005634	fatty acid beta-oxidation:intra-Golgi vesicle-mediated transport:lipid transport:endosome organization:lithium ion transport:protein targeting to vacuole:protein import into peroxisome matrix:vacuole organization:endosomal transport:trichome branching	nucleoside-triphosphatase activity:ATP binding	multivesicular body:plasmodesma:nucleus					gi|567863224|ref|XP_006424266.1|	hypothetical protein CICLE_v10028483mg [Citrus clementina].	FUNHY15tr_m240lflr_TR50857_c0_g1_i2_3	aaa-atpase of vps4 skd1 family	aaa-atpase of vps4 skd1 family	GO:0005515, GO:0005524, GO:0005771, GO:0007032, GO:0008568, GO:0016192	14.8086	14.0854	14.6861	13.387	13.8029	14.9265	14.5547	12.1251	13.8272	12.8253	12.9546	14.0896	15.1926	17.2057	16.08	15.1101	15.0954	14.2051
Pp3c1_13120V3.1	Pp3c1_13120V1.1	Pp1s86_160V6.1		Pp1s86_160V2.1	Phypa_229872	Phpat.001G052200											gi|670372741|ref|XP_008667676.1|	PREDICTED: uncharacterized protein LOC100277042 isoform X1 [Zea mays].	ENCSTtr_onekp_KEFD_59253				13.8447	13.2647	13.3676	11.8896	11.1936	10.6516	12.5154	14.6	13.7738	13.0335	11.5896	12.0265	10.3672	11.7644	12.2163	11.0245	9.86134	12.195
Pp3c1_13140V3.1	Pp3c1_13140V1.1	Pp1s86_159V6.1															gi|302786508|ref|XP_002975025.1|	hypothetical protein SELMODRAFT_415304 [Selaginella moellendorffii].	PHYSPtr_m240lflr_YEPO_scaffold-YEPO-2010953-cf._Physcomicromitrium_sp._2_rc				5.50681	5.60904	3.83617	0.777396	0.465601	2.7691	33.0867	27.0476	13.9475	11.0675	12.0294	10.8863	5.84749	7.01394	5.25878	5.42911	3.57374	7.55492				-2.03258		3.08274	2.30899
Pp3c1_13170V3.1	Pp3c1_13170V1.1	Pp1s86_156V6.1		Pp1s86_156V2.1	Phypa_229869	Phpat.001G052300	0010103:0035304:0010207:0009773:0006096:0006006:0019253:0009657:0006364	0051287:0050661:0047100	0009941:0048046:0016020:0005829:0009570	stomatal complex morphogenesis:regulation of protein dephosphorylation:photosystem II assembly:photosynthetic electron transport in photosystem I:glycolytic process:glucose metabolic process:reductive pentose-phosphate cycle:plastid organization:rRNA processing	NAD binding:NADP binding:glyceraldehyde-3-phosphate dehydrogenase (NADP+) (phosphorylating) activity	chloroplast envelope:apoplast:membrane:cytosol:chloroplast stroma	ARATHwo_AT1G12900.1	glyceraldehyde 3-phosphate dehydrogenase A subunit 2 (GAPA-2); FUNCTIONS IN: NAD or NADH binding, glyceraldehyde-3-phosphate dehydrogenase activity; INVOLVED IN: oxidation reduction, glycolysis, glucose metabolic process; LOCATED IN: apoplast, chloroplast stroma, chloroplast, membrane, chloroplast envelope; EXPRESSED IN: 24 plant structures; EXPRESSED DURING: 14 growth stages; CONTAINS InterPro D…	sp|P19866|G3PA_SPIOL	Glyceraldehyde-3-phosphate dehydrogenase A, chloroplastic	gi|302773371|ref|XP_002970103.1|	hypothetical protein SELMODRAFT_270825 [Selaginella moellendorffii].	PHYSPtr_onekp_YEPO_1059	glyceraldehyde-3-phosphate dehydrogenase	glyceraldehyde-3-phosphate dehydrogenase	GO:0004365, GO:0006096, GO:0009536, GO:0009570, GO:0009941, GO:0016020, GO:0019253, GO:0047100, GO:0048046, GO:0051287, GO:0055114	249.44	210.389	218.369	218.83	415.568	260.865	217.477	301.673	121.143	128.04	135.792	296.024	206.508	117.453	199.549	158.609	416.87	277.564
Pp3c1_13190V3.1	Pp3c1_13190V1.1	Pp1s86_153V6.1		Pp1s86_153V2.1	Phypa_233494	Phpat.001G052400	0009585:0046283:0006281:0010100:0048573:0009647:0010119:0009649:0016567:0009641	0008270:0016874:0042802:0004842	0016604:0080008:0005737:0000152	red, far-red light phototransduction:anthocyanin-containing compound metabolic process:DNA repair:negative regulation of photomorphogenesis:photoperiodism, flowering:skotomorphogenesis:regulation of stomatal movement:entrainment of circadian clock:protein ubiquitination:shade avoidance	zinc ion binding:ligase activity:identical protein binding:ubiquitin-protein transferase activity	nuclear body:Cul4-RING E3 ubiquitin ligase complex:cytoplasm:nuclear ubiquitin ligase complex	ARATHwo_AT2G32950.1	Represses photomorphogenesis and induces skotomorphogenesis in the dark. Contains a ring finger zinc-binding motif, a coiled-coil domain, and several WD-40 repeats, similar to G-beta proteins. The C-terminus has homology to TAFII80, a subunit of the TFIID component of the RNA polymerase II of Drosophila. Nuclear localization in the dark and cytoplasmic in the light.	sp|P43254|COP1_ARATH	E3 ubiquitin-protein ligase COP1	gi|4090943|gb|AAC98912.1|	COP1 homolog [Solanum lycopersicum].	FUNHY15tr_m240lflr_TR5293_c1_g1_i7_3	ubiquitin ligase protein	ubiquitin ligase protein	GO:0004842, GO:0005515, GO:0005654, GO:0005829, GO:0008270, GO:0032440, GO:0055114	14.9198	12.0858	23.1169	27.8396	27.6721	11.7709	16.0584	11.6463	22.9178	14.1721	14.4078	26.0272	15.8981	16.2917	16.3012	16.6475	20.8027	16.6986
Pp3c1_13200V3.1	Pp3c1_13200V1.1	Pp1s86_152V6.1		Pp1s86_152V2.1	Phypa_17499	Phpat.001G052600	7049	0016301:0030246	16020	cell cycle	kinase activity:carbohydrate binding	membrane					gi|573965093|ref|XP_006664666.1|	PREDICTED: L-type lectin-domain containing receptor kinase S.4-like [Oryza brachyantha].	PHYSPtr_m240lflr_YEPO_scaffold-YEPO-2003429-cf._Physcomicromitrium_sp._2_rc	MDF20.27; receptor lectin kinase, putative [Arabidopsis thaliana]	MDF20.27; receptor lectin kinase, putative [Arabidopsis thaliana]	GO:0005488, GO:0005576, GO:0005618, GO:0016740	8.99335	9.43723	12.0766	11.4798	12.7627	7.51817	8.59478	7.2403	8.89332	9.35909	9.4712	7.06132	24.6656	26.3045	23.8128	22.6276	10.0536	18.8535			1.2934	1.59565
Pp3c1_1320V3.1	Pp3c1_1320V1.1	Pp1s200_70V6.1		Pp1s200_70V2.1	Phypa_19874	Phpat.001G006100											gi|108752022|gb|ABG02897.1|	plasma membrane H+-ATPase subunit H [Triticum aestivum].	TRELAtr_m240lflr_FITN_scaffold-FITN-2078760-Treubia_lacunose_1			GO:0005576, GO:0005618, GO:0005773, GO:0005886, GO:0015078, GO:0015991, GO:0016020, GO:0016023	29.6052	20.9518	26.5471	20.2806	19.2405	21.058	22.0974	23.815	21.9531	17.7902	19.2866	19.7918	26.8355	19.6752	19.7971	17.7866	19.6	21.1372
Pp3c1_13240V3.1	Pp3c1_13240V1.1	Pp1s86_149V6.1		Pp1s86_149V2.1	Phypa_80446												gi|302765244|ref|XP_002966043.1|	hypothetical protein SELMODRAFT_439439 [Selaginella moellendorffii].	PHYSPtr_onekp_YEPO_79909															0.0727941
Pp3c1_13260V3.1	Pp3c1_13260V1.1	Pp1s86_147V6.1		Pp1s86_147V2.1	Phypa_165345	Phpat.001G052700	9254	4553	19867	peptidoglycan turnover	hydrolase activity, hydrolyzing O-glycosyl compounds	outer membrane					gi|302782495|ref|XP_002973021.1|	hypothetical protein SELMODRAFT_413418 [Selaginella moellendorffii].	FUNHY15tr_m240lflr_TR31643_c0_g1_i1_3_rc	3d domain protein	3d domain protein	GO:0004553, GO:0009254, GO:0016020, GO:0019867	12.2109	11.1662	12.3961	7.90832	10.7132	11.342	14.1173	11.9863	12.506	14.151	14.2483	12.3099	14.4608	15.4155	14.657	16.6628	11.9076	15.3066
Pp3c1_13270V3.1	Pp3c1_13270V1.1	Pp1s86_146V6.1				Phpat.001G052800	0006412:0006354:0009220	0003735:0000166	5840	translation:DNA-templated transcription, elongation:pyrimidine ribonucleotide biosynthetic process	structural constituent of ribosome:nucleotide binding	ribosome					gi|694425577|ref|XP_009340509.1|	PREDICTED: uncharacterized protein LOC103932605 [Pyrus x bretschneideri].	PHYSPtr_m240lflr_YEPO_scaffold-YEPO-2076209-cf._Physcomicromitrium_sp._4_rc				25.5992	20.0742	21.1826	19.9537	20.5596	20.3994	18.4813	15.9779	18.8679	16.8896	16.2583	18.6092	23.4287	22.3849	23.2442	18.0515	21.4328	21.127
Pp3c1_13280V3.1	Pp3c1_13280V1.1																						0.966033	1.19268	1.09244	0.749817	1.74883	0.62868	0.723062	0.676229	0.884183	0.520254	0.659612	0.903084	0.810398	1.26619	1.60126	0.962092	1.35324	0.496834
Pp3c1_13290V3.1	Pp3c1_13290V1.1	Pp1s86_143V6.1
Pp3c1_13300V3.1	Pp3c1_13300V1.1	Pp1s86_142V6.1					0090305:0006996:0044763:0006259	0004519:0008026:0003677:0005524		nucleic acid phosphodiester bond hydrolysis:organelle organization:single-organism cellular process:DNA metabolic process	endonuclease activity:ATP-dependent helicase activity:DNA binding:ATP binding						gi|729361309|ref|XP_010546166.1|	PREDICTED: DNA annealing helicase and endonuclease ZRANB3 isoform X1 [Tarenaya hassleriana].	FUNHY15tr_m240lflr_TR35511_c0_g2_i1_2					0.0715066	0.0468131	0.0298653	0.0563441	0.0765941		0.0525219	0.0549386	0.0331548	0.0273233	0.0623478	0.0228882	0.0422982	0.0174551	0.0433185	0.0452061	0.055409
Pp3c1_13308V3.1		Pp1s86_142V6.1					0090305:0006996:0044763:0006259	0004519:0008026:0003677:0005524		nucleic acid phosphodiester bond hydrolysis:organelle organization:single-organism cellular process:DNA metabolic process	endonuclease activity:ATP-dependent helicase activity:DNA binding:ATP binding						gi|548839628|gb|ERM99888.1|	hypothetical protein AMTR_s00110p00037960 [Amborella trichopoda].	FUNHY15tr_m240lflr_TR35511_c0_g2_i1_2												0.00981895					0.00907173
Pp3c1_1330V3.1	Pp3c1_1330V1.1	Pp1s200_69V6.1		Pp1s200_69V2.1	Phypa_193574	Phpat.001G006200	42254	19843	0005840:0009507	ribosome biogenesis	rRNA binding	ribosome:chloroplast					gi|719992090|ref|XP_010253461.1|	PREDICTED: 50S ribosomal protein L10, chloroplastic-like [Nelumbo nucifera].	PHYSPtr_onekp_YEPO_13331	50s ribosomal protein l10	50s ribosomal protein l10	GO:0003735, GO:0006412, GO:0009536, GO:0009547, GO:0009570, GO:0022626, GO:0042254	97.0564	93.5749	102.5	98.0755	136.595	104.655	81.4912	86.5134	63.6035	68.2653	67.2904	99.9711	85.1801	75.5188	90.4281	79.8814	121.538	93.4952
Pp3c1_13320V3.1
Pp3c1_13370V3.1	Pp3c1_13370V1.1	Pp1s86_135V6.1			Phypa_80439												gi|125526373|gb|EAY74487.1|	hypothetical protein OsI_02379 [Oryza sativa Indica Group].	NECDOtr_onekp_TMAJ_165484				0.366232
Pp3c1_13380V3.1	Pp3c1_13380V1.1	Pp1s86_134V6.1		Pp1s86_133V2.1	Phypa_80438	Phpat.001G053000													CERPUR40tr_m240lflr_isotig15037_2				0.959211	0.778649	0.588422	0.51672	0.589195	0.526686	1.10729	1.78637	0.853042	0.459644	0.686887	0.845154	0.456929	0.450357	0.425902	0.711049	0.601648	1.00081
Pp3c1_13420V3.1	Pp3c1_13420V1.1	Pp1s86_129V6.1		Pp1s86_129V2.1	Phypa_165343	Phpat.001G053100													PHYSPtr_onekp_YEPO_4709	Dmel_CG17816; CG17816 gene product from transcript CG17816-RD [Drosophila melanogaster]			24.4881	28.8108	24.365	22.4258	19.5318	22.8334	34.0815	41.2051	44.4373	46.1529	41.7328	37.2306	39.1259	37.9165	34.3869	35.6163	31.8343	37.6232
Pp3c1_13430V3.1	Pp3c1_13430V1.1	Pp1s86_128V6.1				Phpat.001G053200													PHYSPtr_m240lflr_YEPO_scaffold-YEPO-2006236-cf._Physcomicromitrium_sp._2_rc			GO:0016020	6.24372	5.52454	3.62101	3.27613	2.86238	3.37009	3.58548	4.30002	4.16675	3.44715	3.67799	2.17123	4.06965	3.2123	2.89321	3.73365	2.28876	3.6975
Pp3c1_13461V3.1																												0.0827466		0.189136	0.0989194	0.134318		0.11226	0.0412112			0.0467981		0.0855141
Pp3c1_13530V3.1	Pp3c1_13530V1.1																gi|645023752|ref|XP_008208805.1|	PREDICTED: uncharacterized protein LOC103316531 [Nasonia vitripennis].	SCOAQtr_onekp_BPSG_2				0.674638	2.815	0.815533	0.178383		0.914983	18.3868	17.5154	12.1687	11.5106	11.696	9.93065	2.96204	4.42127	4.95227	7.24468	4.05019	8.39206				-1.96342		4.84473	3.4813
Pp3c1_13570V3.1	Pp3c1_13570V1.1	Pp1s86_103V6.1		Pp1s86_103V2.1	Phypa_165342	Phpat.001G053300	7165			signal transduction									LEUALtr_onekp_VMXJ_7603	T23K3.2; histidine kinase (AHK4) (WOL)	T23K3.2; histidine kinase (AHK4) (WOL)	GO:0000156, GO:0000160	16.1489	22.6194	19.0341	30.8983	20.1395	20.716	29.5397	30.9615	38.5079	50.5316	48.2826	31.0054	24.6021	30.6071	27.6276	34.0075	23.6138	29.3069
Pp3c1_13600V3.1	Pp3c1_13600V1.1	Pp1s86_100V6.1		Pp1s86_100V2.1	Phypa_229854	Phpat.001G053400	6468	0005524:0004674		protein phosphorylation	ATP binding:protein serine/threonine kinase activity				sp|Q18846|KS6A2_CAEEL	Putative ribosomal protein S6 kinase alpha-2	gi|586774798|ref|XP_006857328.1|	PREDICTED: serine/threonine-protein kinase 38 [Amborella trichopoda].	PHYSPtr_m240lflr_YEPO_scaffold-YEPO-2000653-cf._Physcomicromitrium_sp._6_rc	protein kinase	protein kinase	GO:0004697, GO:0005524, GO:0005634, GO:0005737, GO:0005829, GO:0005886, GO:0006468, GO:0009524	16.1993	15.1221	16.2311	19.0564	15.9992	19.379	17.3362	15.9987	16.2104	17.6063	15.5873	16.5587	21.1023	17.5561	17.7593	17.1185	20.7277	18.4671
Pp3c1_1360V3.1	Pp3c1_1360V1.1	Pp1s200_64V6.1;Pp1s200_65V6.1				Phpat.001G006400	0006761:0006730:0046901	0004326:0005524:0008841		dihydrofolate biosynthetic process:one-carbon metabolic process:tetrahydrofolylpolyglutamate biosynthetic process	tetrahydrofolylpolyglutamate synthase activity:ATP binding:dihydrofolate synthase activity						gi|568824037|ref|XP_006466412.1|	PREDICTED: putative nuclear matrix constituent protein 1-like protein-like isoform X3 [Citrus sinensis].	FUNHY15tr_m240lflr_TR30648_c0_g1_i1_22_rc				13.3488	19.2766	11.9981	13.866	10.6561	15.8413	16.2358	16.0599	18.208	20.7162	19.8706	16.9361	20.9669	17.1363	18.1839	16.8027	19.2617	22.2976
Pp3c1_13640V3.1	Pp3c1_13640V1.1	Pp1s86_95V6.1;Pp1s86_96V6.1		Pp1s86_95V2.1	Phypa_165339	Phpat.001G053500	6468	0005524:0004674		protein phosphorylation	ATP binding:protein serine/threonine kinase activity						gi|823152894|ref|XP_012476284.1|	PREDICTED: serine/threonine-protein kinase tricorner-like isoform X3 [Gossypium raimondii].	FUNHY15tr_m240lflr_TR8490_c0_g1_i1_1	serine threonine-protein:FCAALL.182; protein kinase family protein [Arabidopsis thaliana]	serine threonine-protein	GO:0004697, GO:0005524, GO:0006468	17.5179	17.7544	16.0151	14.4967	16.5735	16.7974	15.7151	16.3482	18.6976	20.2755	18.5982	16.1944	18.8413	19.632	18.453	19.4605	17.7122	19.4301
Pp3c1_13670V3.1	Pp3c1_13670V1.1	Pp1s86_93V6.1			Phypa_80421																		0.230957		0.418787				0.595434	1.09633			0.162955	0.991574	0.409513	0.151359			0.161764
Pp3c1_13671V3.1																							0.156956		0.379472	0.217882						0.201568	0.110743		0.278302			0.105344	0.109934
Pp3c1_13710V3.1	Pp3c1_13710V1.1	Pp1s86_85V6.1		Pp1s86_85V2.1	Phypa_80418
Pp3c1_13720V3.1	Pp3c1_13720V1.1	Pp1s86_83V6.1		Pp1s86_83V2.1	Phypa_80417														PHYSPtr_onekp_YEPO_7997				3.36897	2.61759	2.32718	2.40516	2.2808	0.742493	1.73712	2.61097	1.8435	0.927111	1.69787	1.70469	15.9295	14.1934	14.4477	13.373	6.4722	7.14203			2.42231	2.84662
Pp3c1_13760V3.1	Pp3c1_13760V1.1												ARATHwo_ATMG00810.1	hypothetical protein	sp|P92519|M810_ARATH	Uncharacterized mitochondrial protein AtMg00810	gi|691795489|emb|CDO69616.1|	hypothetical protein BN946_scf184851.g4 [Trametes cinnabarina].	PELNEtr_onekp_JHFI_114172									0.0323651	0.17578	0.147955			0.0769703	0.0878176	0.0322383		0.0737572	0.0366087	0.0764079	0.100343
Pp3c1_13780V3.1	Pp3c1_13780V1.1	Pp1s86_77V6.1		Pp1s86_77V2.1	Phypa_131109		0006071:0006629	8889		glycerol metabolic process:lipid metabolic process	glycerophosphodiester phosphodiesterase activity						gi|222622334|gb|EEE56466.1|	hypothetical protein OsJ_05675 [Oryza sativa Japonica Group].	PHYSPtr_m240lflr_YEPO_scaffold-YEPO-2082212-cf._Physcomicromitrium_sp._5_rc	MCK7.4; strong similarity to unknown protein (pir||T04792) [Arabidopsis thaliana]	MCK7.4; strong similarity to unknown protein (pir||T04792) [Arabidopsis thaliana]	GO:0006071, GO:0008889, GO:0016020	25.8901	22.0112	26.0349	24.1595	26.2893	25.1067	21.4476	19.433	27.259	22.3288	22.3324	23.9472	26.3885	29.7591	28.0244	27.0868	27.0227	22.3198
Pp3c1_13800V3.1	Pp3c1_13800V1.1	Pp1s86_75V6.1;Pp1s86_76V6.1		Pp1s86_75V2.1	Phypa_229845	Phpat.001G053800													FUNHY15tr_m240lflr_TR48720_c0_g8_i2_2			GO:0016020	0.111033	0.0745535	0.0223702	0.770662		0.329414	0.166982	0.0250983			0.0261136	0.07945	0.0874995	0.0242553	0.0750705	0.0745212	0.0777684
Pp3c1_13820V3.1		Pp1s86_73V6.1																									0.0763038	0.0363045	0.0788702				0.172678	0.0328355			0.0413674			0.0375187
Pp3c1_13830V3.1	Pp3c1_13830V1.1	Pp1s86_72V6.1		Pp1s86_72V2.1	Phypa_233484	Phpat.001G053900											gi|403337425|gb|EJY67927.1|	Bacterial lipocalin (macronuclear) [Oxytricha trifallax].	PHYSPtr_onekp_YEPO_77976	outer membrane lipoprotein blc	outer membrane lipoprotein blc	GO:0005488, GO:0016020	137.506	202.604	149.818	102.856	133.088	96.5647	104.343	201.762	117.566	134.623	131.493	83.1248	47.8196	64.9384	60.3607	91.3324	65.6681	59.536			-1.50098	-1.2924
Pp3c1_13840V3.1	Pp3c1_13840V1.1	Pp1s86_71V6.1		Pp1s86_71V2.1	Phypa_229842	Phpat.001G054000			0016020:0044444:0043231			membrane:cytoplasmic part:intracellular membrane-bounded organelle	ARATHwo_AT1G30360.1	early-responsive to dehydration 4 (ERD4); INVOLVED IN: response to water deprivation; LOCATED IN: plasma membrane, chloroplast, vacuole, membrane, chloroplast envelope; EXPRESSED IN: 26 plant structures; EXPRESSED DURING: 14 growth stages; CONTAINS InterPro DOMAIN/s: Protein of unknown function DUF221 (InterPro:IPR003864); BEST Arabidopsis thaliana protein match is: ERD (early-responsive to dehyd…	sp|Q9C8G5|CSCLD_ARATH	CSC1-like protein ERD4	gi|695041845|ref|XP_009408546.1|	PREDICTED: CSC1-like protein ERD4 [Musa acuminata subsp. malaccensis].	PHYSPtr_onekp_YEPO_19529	early responsive to dehydration protein	early responsive to dehydration protein	GO:0016020, GO:0016023	7.84288	8.67582	6.9242	7.91059	8.02258	8.66682	6.98608	8.96377	8.23546	9.1384	10.4456	7.68498	7.77348	7.60874	7.0007	8.76817	8.6256	8.61894
Pp3c1_13870V3.1	Pp3c1_13870V1.1	Pp1s86_67V6.1;Pp1s86_68V6.1		Pp1s86_67V2.1	Phypa_131125		0016311:0044699	0030145:0003993	5615	dephosphorylation:single-organism process	manganese ion binding:acid phosphatase activity	extracellular space	ARATHwo_AT2G01890.1	Encodes a purple acid phosphatase (PAP) belonging to the low molecular weight plant PAP group.	sp|Q8VYZ2|PPA8_ARATH	Purple acid phosphatase 8	gi|359807281|ref|NP_001241371.1|	uncharacterized protein LOC100817359 precursor [Glycine max].	PHYSPtr_onekp_YEPO_13811	tartrate-resistant acid phosphatase type 5	tartrate-resistant acid phosphatase type 5	GO:0005737, GO:0016023, GO:0016787	94.3196	96.8106	67.0025	102.807	90.3097	99.3523	52.7387	68.8452	84.0302	86.1407	88.7315	66.6001	54.6545	50.1562	48.696	46.4061	59.0657	61.6588
Pp3c1_13890V3.1	Pp3c1_13890V1.1	Pp1s86_66V6.1				Phpat.001G054200	55085		16021	transmembrane transport		integral component of membrane	ARATHwo_AT2G30160.1	Mitochondrial substrate carrier family protein; FUNCTIONS IN: transporter activity, binding; INVOLVED IN: transport, mitochondrial transport, transmembrane transport; LOCATED IN: mitochondrial inner membrane, membrane; EXPRESSED IN: 22 plant structures; EXPRESSED DURING: 15 growth stages; CONTAINS InterPro DOMAIN/s: Mitochondrial carrier protein (InterPro:IPR002067), Mitochondrial substrate carri…	sp|O97562|UCP2_PIG	Mitochondrial uncoupling protein 2	gi|674947000|emb|CDX86153.1|	BnaA06g28700D [Brassica napus].	RACVAtr_onekp_RDOO_118161				0.153449	0.463654	0.370993	0.113607	0.0765474	0.309573	0.474732	0.270553	0.478926	0.413833	0.23819	0.658807	0.308361	0.301691	0.207497	0.0617937	0.322431	0.526939
Pp3c1_1390V3.1	Pp3c1_1390V1.1	Pp1s200_62V6.1		Pp1s200_62V2.1	Phypa_143253	Phpat.001G006500	6468	0005509:0005524:0004674		protein phosphorylation	calcium ion binding:ATP binding:protein serine/threonine kinase activity						gi|672130005|ref|XP_008788526.1|	na	TIMAUtr_onekp_ZQRI_14168	zinc finger	zinc finger	GO:0004872, GO:0005509, GO:0009536, GO:0016020, GO:0016023	17.6732	14.26	15.4454	9.2678	11.4586	11.5331	15.2939	16.409	17.8814	13.5102	11.7822	13.8199	12.8146	16.1165	15.4596	14.6511	11.7479	12.5692
Pp3c1_13910V3.1	Pp3c1_13910V1.1	Pp1s86_63V6.1		Pp1s86_63V2.1	Phypa_106599	Phpat.001G054300			5615			extracellular space					gi|823225400|ref|XP_012445501.1|	PREDICTED: serpin-ZX [Gossypium raimondii].	PHYSPtr_onekp_YEPO_19236	Serpin family protein	Serpin family protein	GO:0004867, GO:0016020	11.4148	11.0443	14.7643	17.8014	17.1616	10.92	13.6419	18.2799	19.7112	27.1816	23.9034	17.1634	10.6411	13.2822	10.3503	19.2089	11.4914	13.4075
Pp3c1_13930V3.1	Pp3c1_13930V1.1	Pp1s86_61V6.1		Pp1s86_61V2.1	Phypa_106598	Phpat.001G054400	55114	0016491:0005507		oxidation-reduction process	oxidoreductase activity:copper ion binding		ARATHwo_AT5G03260.1	putative laccase, a member of laccase family of genes (17 members in Arabidopsis).	sp|Q941X2|LAC3_ORYSJ	Laccase-3	gi|731349224|ref|XP_010685887.1|	PREDICTED: laccase-3-like [Beta vulgaris subsp. vulgaris].	PHYSPtr_onekp_YEPO_80982	laccase (diphenol oxidase)-like protein	laccase (diphenol oxidase)-like protein	GO:0005507, GO:0005576, GO:0005618, GO:0016491	6.0863	13.4401	16.1509	5.36146	6.85969	4.67356	9.56575	22.954	23.7101	33.5427	48.6608	18.6372	5.94409	19.5808	7.87794	16.3615	9.48324	11.915						2.57789
Pp3c1_13950V3.1	Pp3c1_13950V1.1
Pp3c1_13990V3.1	Pp3c1_13990V1.1	Pp1s86_58V6.1		Pp1s86_59V2.1	Phypa_80403	Phpat.001G054500	71929	19799		alpha-tubulin acetylation	tubulin N-acetyltransferase activity						gi|678308628|emb|CDW90312.1|	alpha-tubulin n-acetyltransferase [Stylonychia lemnae].	SCHFAtr_onekp_IGUH_19396				2.50543	1.36754	1.15285	1.54078	0.201584	0.978299	7.16774	5.54645	3.89836	2.59479	3.76359	3.17494	1.77697	2.41525	1.61745	1.34524	1.268	2.69605
Pp3c1_14000V3.1	Pp3c1_14000V1.1	Pp1s86_57V6.1		Pp1s86_57V2.1	Phypa_233476	Phpat.001G054600	2000643:0017157:0015031:0007264:0048260:0008152	0005515:0005525:0019003:0003924	0005925:0005802:0012506:0098559:0070062:0032580:0009898	positive regulation of early endosome to late endosome transport:regulation of exocytosis:protein transport:small GTPase mediated signal transduction:positive regulation of receptor-mediated endocytosis:metabolic process	protein binding:GTP binding:GDP binding:GTPase activity	focal adhesion:trans-Golgi network:vesicle membrane:cytoplasmic side of early endosome membrane:extracellular vesicular exosome:Golgi cisterna membrane:cytoplasmic side of plasma membrane					gi|115463295|ref|NP_001055247.1|	Os05g0341600 [Oryza sativa Japonica Group].	PHYSPtr_onekp_YEPO_1395	member ras oncogene family	member ras oncogene family	GO:0003924, GO:0005515, GO:0005525, GO:0005737, GO:0005768, GO:0005794, GO:0007264, GO:0012505, GO:0015031, GO:0019003, GO:0031090, GO:0031410, GO:0044446	6.3439	5.15453	8.1199	7.26879	7.75643	5.50401	8.04022	7.06154	8.1932	6.82341	8.07441	8.54477	8.75931	7.80261	9.46744	7.29908	7.41799	8.08537
Pp3c1_14030V3.1	Pp3c1_14030V1.1	Pp1s86_56V6.1		Pp1s86_56V2.1	Phypa_233475												gi|685073525|emb|CDZ81651.1|	hypothetical protein BN1013_02187 [Chlamydia sp. 'Rubis'].	FUNHY15tr_m240lflr_TR43472_c0_g2_i1_6_rc				4.21592	4.47139	4.80683	5.32038	4.93908	4.81363	5.14638	5.458	4.73497	3.48642	4.68726	4.71363	3.77541	3.78856	4.23246	3.2583	3.84768	3.62325
Pp3c1_14040V3.1	Pp3c1_14040V1.1	Pp1s86_54V6.1																					0.212925										0.0600931
Pp3c1_140V3.1	Pp3c1_140V1.1	Pp1s283_22V6.1				Phpat.001G001100	6011	3983		UDP-glucose metabolic process	UTP:glucose-1-phosphate uridylyltransferase activity						gi|212275097|ref|NP_001130368.1|	na	PHYSPtr_m240lflr_YEPO_scaffold-YEPO-2018838-cf._Physcomicromitrium_sp._3				41.2982	32.2094	35.3073	34.826	35.555	42.2175	26.03	33.2817	23.5724	20.4427	21.8823	29.1032	34.1871	29.632	36.0848	27.5618	46.4263	33.2759
Pp3c1_14120V3.1	Pp3c1_14120V1.1	Pp1s86_52V6.1		Pp1s86_52V2.1	Phypa_233474			5509			calcium ion binding		ARATHwo_AT1G20760.1	Calcium-binding EF hand family protein; FUNCTIONS IN: calcium ion binding; LOCATED IN: plasma membrane; EXPRESSED IN: 24 plant structures; EXPRESSED DURING: 15 growth stages; CONTAINS InterPro DOMAIN/s: EF-HAND 2 (InterPro:IPR018249), EPS15 homology (EH) (InterPro:IPR000261), EF-hand-like domain (InterPro:IPR011992), Calcium-binding EF-hand (InterPro:IPR002048); BEST Arabidopsis thaliana protein …			gi|672175658|ref|XP_008807893.1|	PREDICTED: epidermal growth factor receptor substrate 15-like [Phoenix dactylifera].	PHYSPtr_m240lflr_YEPO_scaffold-YEPO-2000742-cf._Physcomicromitrium_sp._9_rc	calcium ion binding	calcium ion binding	GO:0005509	6.44486	7.86377	6.52483	6.32473	6.29602	6.80379	5.27892	5.51771	6.66687	6.92309	5.75987	6.41308	7.1025	7.10985	6.92652	6.68659	6.10336	7.61591
Pp3c1_14130V3.1																								1.01256															0.352075
Pp3c1_14150V3.1	Pp3c1_14150V1.1	Pp1s86_42V6.1		Pp1s86_42V2.1	Phypa_229829		90502	0004523:0003676		RNA phosphodiester bond hydrolysis, endonucleolytic	RNA-DNA hybrid ribonuclease activity:nucleic acid binding						gi|503142625|ref|WP_013377286.1|	RNase H [Stigmatella aurantiaca].	POLCOtr_onekp_SZYG_12124	ribonuclease h	ribonuclease h	GO:0003676, GO:0004523	0.235339		0.0568976	0.0871174		0.0558565	3.155	3.31948	0.600963	0.604457	1.46121	1.16194	0.389464	0.308461	0.445522	0.315902	0.0659334	0.519522
Pp3c1_1420V3.1																							0.384543			0.118625			0.826165		0.181847					0.336017	0.346659		0.179558	0.157203
Pp3c1_1421V3.1																																0.0581674		0.0486152	0.0535406	0.0593669	0.0612471	0.303995		0.0555489
Pp3c1_14230V3.1	Pp3c1_14230V1.1	Pp1s86_33V6.1		Pp1s86_33V2.1	Phypa_233473	Phpat.001G055200	6355	0003700:0003677	5634	regulation of transcription, DNA-templated	sequence-specific DNA binding transcription factor activity:DNA binding	nucleus							PHYSPtr_m240lflr_YEPO_scaffold-YEPO-2078123-cf._Physcomicromitrium_sp._4_rc	dehydration responsive element-binding protein 1	dehydration responsive element-binding protein 1	GO:0003700, GO:0005634, GO:0005654, GO:0006355, GO:0006950, GO:0009617	1.94516	3.1949	0.47028	1.13548	0.111962	0.639242	1.1187	2.02935	0.806636	0.614899	1.9003	0.931482	0.919732	0.706027	0.647456	0.562379	0.880326	2.34888
Pp3c1_14250V3.1	Pp3c1_14250V1.1	Pp1s86_31V6.1		Pp1s86_31V2.1	Phypa_106596	Phpat.001G055300		0030145:0045735	5576		manganese ion binding:nutrient reservoir activity	extracellular region					gi|358248248|ref|NP_001239847.1|	germin-like protein subfamily 3 member 2-like precursor [Glycine max].	PHYSPtr_m240lflr_YEPO_scaffold-YEPO-2080335-cf._Physcomicromitrium_sp._3	F14J9.22; germin-like protein (GLP4) (GLP5)	F14J9.22; germin-like protein (GLP4) (GLP5)	GO:0016020, GO:0030145, GO:0045735, GO:0048046	101.642	47.1176	13.5582	27.4007	8.69641	53.5887	18.036	42.36	10.7892	6.28894	8.21604	16.9312	16.0857	3.84526	6.74398	6.45229	38.093	27.8427
Pp3c1_14290V3.1	Pp3c1_14290V1.1	Pp1s86_26V6.1		Pp1s86_26V2.1	Phypa_131064	Phpat.001G055400											gi|302783404|ref|XP_002973475.1|	hypothetical protein SELMODRAFT_149040 [Selaginella moellendorffii].	RHYSEtr_onekp_JADL_5084	cbs domain containing protein	cbs domain containing protein	GO:0005739, GO:0016020	4.0912	2.34192	1.54773	1.78414	0.880954	3.33572	10.927	8.90194	5.47002	4.29016	4.8387	5.63908	2.41806	3.81925	3.50241	3.06194	1.93783	3.68192
Pp3c1_14300V3.1	Pp3c1_14300V1.1	Pp1s86_25V6.1											ARATHwo_AT3G56020.1	Ribosomal protein L41 family; FUNCTIONS IN: structural constituent of ribosome; INVOLVED IN: translation; LOCATED IN: ribosome, cytosolic large ribosomal subunit; CONTAINS InterPro DOMAIN/s: Ribosomal protein L41 (InterPro:IPR007836); Has 185 Blast hits to 185 proteins in 75 species: Archae - 0; Bacteria - 0; Metazoa - 88; Fungi - 40; Plants - 48; Viruses - 0; Other Eukaryotes - 9 (source: NCBI B…	sp|P62121|RL41_TOBAC	60S ribosomal protein L41			PRUPE_ppa022729m			GO:0003735, GO:0005840, GO:0006412	194.053	155.446	315.436	158.357	204.974	143.864	170.72	162.202	166.611	138.142	256.864	234.18	320.386	205.113	323.035	192.622	227.117	279.415
Pp3c1_14310V3.1	Pp3c1_14310V1.1	Pp1s86_24V6.1		Pp1s86_24V2.1	Phypa_185733	Phpat.001G055500											gi|566179651|ref|XP_002309952.2|	hypothetical protein POPTR_0007s04880g [Populus trichocarpa].	FUNHY15tr_m240lflr_TR13015_c0_g1_i1_3	cbs domain containing protein	cbs domain containing protein	GO:0005739, GO:0009536, GO:0016020	16.3569	18.3874	20.0985	21.2502	18.6489	19.3271	15.9873	15.7635	17.5747	17.329	16.8013	17.5868	17.8104	20.5846	19.3582	17.7706	19.4781	18.2177
Pp3c1_14330V3.1	Pp3c1_14330V1.1	Pp1s86_22V6.1		Pp1s86_22V2.1	Phypa_213098	Phpat.001G055600			0005739:0009706			mitochondrion:chloroplast inner membrane	ARATHwo_AT5G12470.1	Protein of unknown function (DUF3411); FUNCTIONS IN: molecular_function unknown; INVOLVED IN: biological_process unknown; LOCATED IN: mitochondrion, chloroplast, plastid, chloroplast inner membrane, chloroplast envelope; EXPRESSED IN: 24 plant structures; EXPRESSED DURING: 14 growth stages; CONTAINS InterPro DOMAIN/s: Protein of unknown function DUF3411 (InterPro:IPR021825); BEST Arabidopsis thal…			gi|658019304|ref|XP_008345002.1|	PREDICTED: uncharacterized protein LOC103407905 [Malus domestica].	PHYSPtr_m240lflr_YEPO_scaffold-YEPO-2017375-cf._Physcomicromitrium_sp._5_rc	T2L20.17; expressed protein	T2L20.17; expressed protein	GO:0009536, GO:0016020	7.32752	6.30261	7.83297	6.19278	7.96765	6.71945	11.0979	8.4049	9.06371	8.87877	9.00128	8.46068	7.80268	9.65717	9.22604	9.23982	8.34169	8.03346
Pp3c1_14380V3.1	Pp3c1_14380V1.1	Pp1s86_10V6.1		Pp1s86_10V2.1	Phypa_131083	Phpat.001G055700											gi|848885755|ref|XP_012843121.1|	PREDICTED: uncharacterized protein LOC105963273 [Erythranthe guttata].	PHYSPtr_onekp_YEPO_75126	plasma membrane associated protein	plasma membrane associated protein	GO:0016020, GO:0016023	36.8613	31.8224	39.4778	68.7587	27.3172	47.3152	41.641	37.8103	51.478	47.7361	52.6405	49.8711	50.0591	43.2104	56.1276	54.2319	30.684	72.6681
Pp3c1_14440V3.1	Pp3c1_14440V1.1	Pp1s86_4V6.1				Phpat.001G055800	0048519:0006869:0009855:0006355:0010051:0009734:0009887:0010014:0009909:0048439:0010073:0048481	0046983:0003677:0008289:0003700	5634	negative regulation of biological process:lipid transport:determination of bilateral symmetry:regulation of transcription, DNA-templated:xylem and phloem pattern formation:auxin-activated signaling pathway:organ morphogenesis:meristem initiation:regulation of flower development:flower morphogenesis:meristem maintenance:ovule development	protein dimerization activity:DNA binding:lipid binding:sequence-specific DNA binding transcription factor activity	nucleus					gi|703076881|ref|XP_010090447.1|	Auxin response factor 6 [Morus notabilis].	CERPUR40tr_m240lflr_isotig03420_3_rc				2.30184	5.72776	4.31026	4.30224	4.503	3.26728	3.78174	3.42798	3.90587	7.47717	4.96784	4.06929	4.42822	4.37768	3.41776	5.08913	3.66704	5.14786
Pp3c1_14480V3.1	Pp3c1_14480V1.1	Pp1s86_1V6.1				Phpat.001G055900	0009908:0006869:0007389:0009886:0006355:0048507:0009734	0046983:0003677:0008289	5634	flower development:lipid transport:pattern specification process:post-embryonic morphogenesis:regulation of transcription, DNA-templated:meristem development:auxin-activated signaling pathway	protein dimerization activity:DNA binding:lipid binding	nucleus					gi|568827845|ref|XP_006468259.1|	PREDICTED: auxin response factor 6-like isoform X2 [Citrus sinensis].	FUNHY15tr_m240lflr_TR10959_c0_g1_i1_4				15.6676	18.0358	21.1407	18.2318	25.795	19.6843	22.3675	21.4469	23.0408	35.4598	36.1503	24.5066	30.2179	25.4041	25.9255	30.7584	20.5702	28.1358
Pp3c1_14540V3.1	Pp3c1_14540V1.1	Pp1s230_8V6.1;Pp1s230_9V6.1		Pp1s230_8V2.1	Phypa_195086	Phpat.001G056000	55114	16491		oxidation-reduction process	oxidoreductase activity						gi|302796836|ref|XP_002980179.1|	hypothetical protein SELMODRAFT_112739 [Selaginella moellendorffii].	PHYSPtr_onekp_YEPO_16136	deoxymugineic acid synthase1	deoxymugineic acid synthase1	GO:0006826, GO:0016491, GO:0016740, GO:0055114	5.22766	6.29149	7.73863	8.32287	7.23774	5.25746	7.90948	7.90124	8.35909	8.98927	7.22062	8.01234	7.04358	9.08755	7.63807	9.00942	7.44713	6.73729
Pp3c1_14550V3.1	Pp3c1_14550V1.1	Pp1s230_8V6.1;Pp1s230_9V6.1				Phpat.001G056100	6629			lipid metabolic process							gi|302771225|ref|XP_002969031.1|	hypothetical protein SELMODRAFT_145948 [Selaginella moellendorffii].	DIPFOtr_onekp_AWOI_12525				0.111108	0.0335717	0.22833	0.113107	0.0277128	0.0527417	0.486962	0.452073	0.0788126	0.142687	0.25086	0.10733	0.0656688	0.101941	0.0901453	0.0745714	0.0933849	0.122638
Pp3c1_145V3.1		Pp1s283_22V6.1																					0.0370823	0.0746973					0.0478013	0.100587	0.105215						0.15043	0.0497766	0.0519456
Pp3c1_14600V3.1	Pp3c1_14600V1.1																		TAKLEtr_m240lflr_SKQD_scaffold-SKQD-2054381-Takakia_lepidozioides_1										0.289882
Pp3c1_14610V3.1	Pp3c1_14610V1.1																		BUXAPtr_onekp_HRWG_2085												0.224502				0.374123
Pp3c1_14630V3.1	Pp3c1_14630V1.1	Pp1s230_15V6.1		Pp1s230_15V2.1	Phypa_92741														PHYSPtr_m240lflr_YEPO_scaffold-YEPO-2000767-cf._Physcomicromitrium_sp._1	T5M16.7; nucellin protein, putative [Arabidopsis thaliana]	T5M16.7; nucellin protein, putative [Arabidopsis thaliana]	GO:0004190, GO:0006508, GO:0016020	0.180325	0.35189	0.177113	0.166881	0.435716	0.347744	1.56904	1.14641	0.799444	0.882893	0.922425	0.665324	0.532895	0.517025	0.426719	0.559753	0.252603	0.691105
Pp3c1_14631V3.1		Pp1s230_15V6.1					6508	4190		proteolysis	aspartic-type endopeptidase activity		ARATHwo_AT1G49050.1	Eukaryotic aspartyl protease family protein; FUNCTIONS IN: aspartic-type endopeptidase activity; INVOLVED IN: proteolysis; EXPRESSED IN: 24 plant structures; EXPRESSED DURING: 13 growth stages; CONTAINS InterPro DOMAIN/s: Peptidase aspartic (InterPro:IPR021109), Peptidase aspartic, catalytic (InterPro:IPR009007), Peptidase A1 (InterPro:IPR001461), Peptidase aspartic, active site (InterPro:IPR0019…	sp|A2ZC67|ASP1_ORYSI	Aspartic proteinase Asp1			FUNHY15tr_m240lflr_TR7932_c0_g1_i1_1				1.16059	1.36375	0.841787	1.28888	1.37502	1.10185	1.87009	1.70524	1.72883	1.6892	3.00254	2.82359	1.02893	1.24232	1.28166	2.20702	1.35482	1.77921
Pp3c1_14640V3.1	Pp3c1_14640V1.1	Pp1s230_16V6.1				Phpat.001G056300											gi|593784971|ref|XP_007155526.1|	hypothetical protein PHAVU_003G209300g [Phaseolus vulgaris].	ODOPRtr_onekp_YBQN_114343			GO:0004672, GO:0005524, GO:0006468	0.31641	0.19121	0.229494	0.175692	0.0263066	0.0750984	0.353488	0.228872	0.568583	0.379253	0.65486	0.701866	0.224412	0.221185	0.114095	0.254835	0.0590977	0.28457
Pp3c1_14660V3.1	Pp3c1_14660V1.1	Pp1s230_18V6.1		Pp1s230_18V2.1	Phypa_195087		0010026:0031507:0009933:0000003:0000724:0009555:0048366:0006334:0008283:0006351	0042393:0000166	0033186:0005634	trichome differentiation:heterochromatin assembly:meristem structural organization:reproduction:double-strand break repair via homologous recombination:pollen development:leaf development:nucleosome assembly:cell proliferation:transcription, DNA-templated	histone binding:nucleotide binding	CAF-1 complex:nucleus			sp|Q6BYU4|HIR1_DEBHA	Protein HIR1	gi|769794909|ref|XP_011628572.1|	PREDICTED: LOW QUALITY PROTEIN: chromatin assembly factor 1 subunit FAS2 [Amborella trichopoda].	FUNHY15tr_m240lflr_TR25851_c0_g2_i1_5_rc	chromatin assembly factor-i p60 subunit	chromatin assembly factor-i p60 subunit	GO:0000166, GO:0000724, GO:0005515, GO:0005678, GO:0005739, GO:0005829, GO:0006334, GO:0008283, GO:0009555, GO:0009933, GO:0010026, GO:0016020, GO:0031507				0.0119783											0.0175021
Pp3c1_14663V3.1		Pp1s230_18V6.1					0010026:0031507:0009933:0000003:0000724:0009555:0048366:0006334:0008283:0006351	0042393:0000166	0033186:0005634	trichome differentiation:heterochromatin assembly:meristem structural organization:reproduction:double-strand break repair via homologous recombination:pollen development:leaf development:nucleosome assembly:cell proliferation:transcription, DNA-templated	histone binding:nucleotide binding	CAF-1 complex:nucleus					gi|565432781|ref|XP_006280415.1|	hypothetical protein CARUB_v10026349mg [Capsella rubella].	FUNHY15tr_m240lflr_TR25851_c0_g2_i1_5_rc
Pp3c1_14670V3.1	Pp3c1_14670V1.1	Pp1s230_19V6.1		Pp1s230_19V2.1	Phypa_195090	Phpat.001G056600	3333	15171	16021	amino acid transmembrane transport	amino acid transmembrane transporter activity	integral component of membrane	ARATHwo_AT1G58030.1	Encodes a member of the cationic amino acid transporter (CAT) subfamily of amino acid polyamine choline transporters. Localized to the tonoplast.	sp|Q9ASS7|CAAT2_ARATH	Cationic amino acid transporter 2, vacuolar	gi|255569446|ref|XP_002525690.1|	cationic amino acid transporter, putative [Ricinus communis].	PHYSPtr_onekp_YEPO_13776	cationic amino acid transporter	cationic amino acid transporter	GO:0004096, GO:0005515, GO:0005739, GO:0005777, GO:0005886, GO:0006865, GO:0006979, GO:0006995, GO:0008219, GO:0009409, GO:0009507, GO:0009648, GO:0009705, GO:0009970, GO:0010319, GO:0015171, GO:0016020, GO:0016036, GO:0022626, GO:0045454	8.74068	7.44368	8.46979	9.74777	11.3506	9.12972	8.62672	10.5445	7.13298	6.29259	7.52208	10.6059	7.99332	7.23087	6.81461	6.42105	10.5648	8.62144
Pp3c1_14690V3.1	Pp3c1_14690V1.1																gi|571455608|ref|XP_006580133.1|	PREDICTED: kinesin-like protein KIN12A-like isoform X1 [Glycine max].	SYNPRtr_onekp_GRKU_74228
Pp3c1_14740V3.1	Pp3c1_14740V1.1	Pp1s230_28V6.1		Pp1s230_28V2.1	Phypa_170076	Phpat.001G056800													PHYSPtr_onekp_YEPO_15910			GO:0005634	14.5732	13.3048	12.4169	11.0069	12.4582	10.3487	13.2409	17.8204	12.0379	9.99153	10.4482	9.0319	11.2529	10.9986	10.2981	10.128	9.51572	10.7813
Pp3c1_14750V3.1	Pp3c1_14750V1.1	Pp1s230_31V6.1		Pp1s230_31V2.1	Phypa_170077	Phpat.001G056900											gi|545355985|ref|XP_005643754.1|	hypothetical protein COCSUDRAFT_59693 [Coccomyxa subellipsoidea C-169].	LOEBRtr_onekp_WSPM_7221				14.6342	15.1062	14.1486	8.60372	9.65854	11.747	32.2572	29.2562	20.2219	16.1292	16.4267	17.9342	14.1161	16.1089	16.7904	16.8589	12.4907	18.1807
Pp3c1_14760V3.1	Pp3c1_14760V1.1	Pp1s230_32V6.1		Pp1s230_32V2.1	Phypa_170078	Phpat.001G057000	0046777:0055114:0019684:0010155:0010258	0000166:0016655	0010598:0005739:0009535:0005886	protein autophosphorylation:oxidation-reduction process:photosynthesis, light reaction:regulation of proton transport:NADH dehydrogenase complex (plastoquinone) assembly	nucleotide binding:oxidoreductase activity, acting on NAD(P)H, quinone or similar compound as acceptor	NAD(P)H dehydrogenase complex (plastoquinone):mitochondrion:chloroplast thylakoid membrane:plasma membrane					gi|731338194|ref|XP_010680197.1|	PREDICTED: uncharacterized protein LOC104895398 [Beta vulgaris subsp. vulgaris].	PHYSPtr_onekp_YEPO_75912	PREDICTED: hypothetical protein [Vitis vinifera]	PREDICTED: hypothetical protein [Vitis vinifera]	GO:0005739, GO:0009536	24.3283	15.17	26.8185	12.4584	32.1846	15.4026	20.8552	18.9949	11.9471	11.0862	10.6484	22.0626	17.6615	14.0051	20.571	11.5878	30.3586	17.5466
Pp3c1_14770V3.1	Pp3c1_14770V1.1	Pp1s230_33V6.1		Pp1s230_33V2.1	Phypa_170079	Phpat.001G057100											gi|116778984|gb|ABK21086.1|	unknown [Picea sitchensis].	PHYSPtr_m240lflr_YEPO_scaffold-YEPO-2079788-cf._Physcomicromitrium_sp._4_rc	holiday junction uri domain nuclease	holiday junction uri domain nuclease	GO:0004518, GO:0005622, GO:0006281	12.1196	16.1641	18.5561	14.8039	17.7279	14.8178	19.6299	13.903	21.4797	21.5971	23.7313	27.8536	24.1936	21.3329	25.1493	23.1134	16.3658	25.2939
Pp3c1_14780V3.1		Pp1s230_34V6.1				Phpat.001G057200			16021			integral component of membrane	ARATHwo_AT5G65290.1	LMBR1-like membrane protein; FUNCTIONS IN: molecular_function unknown; INVOLVED IN: biological_process unknown; LOCATED IN: endomembrane system, integral to membrane; EXPRESSED IN: 23 plant structures; EXPRESSED DURING: 15 growth stages; CONTAINS InterPro DOMAIN/s: LMBR1-like membrane protein, conserved region (InterPro:IPR006876); Has 1807 Blast hits to 1807 proteins in 277 species: Archae - 0; …	sp|Q54Q92|LMD2A_DICDI	LMBR1 domain-containing protein 2 homolog A	gi|659080029|ref|XP_008440573.1|	PREDICTED: LMBR1 domain-containing protein 2 homolog A [Cucumis melo].	DICSCtr_onekp_NGTD_102973				3.7264	3.33615	2.83625	1.67639	0.968175	2.17016	21.994	18.9056	13.3877	12.8058	10.3951	10.425	4.52724	6.28618	5.48215	6.53045	3.31084	7.48991				-1.73717		2.8044	2.45549
Pp3c1_14800V3.1	Pp3c1_14800V1.1	Pp1s230_36V6.1		Pp1s230_36V2.1	Phypa_145629	Phpat.001G057300	0010103:0019684:0006098:0010218:0016117:0010114:0009902:0015995:0009637:0019761:0006364:0010027		0009941:0009508:0009535	stomatal complex morphogenesis:photosynthesis, light reaction:pentose-phosphate shunt:response to far red light:carotenoid biosynthetic process:response to red light:chloroplast relocation:chlorophyll biosynthetic process:response to blue light:glucosinolate biosynthetic process:rRNA processing:thylakoid membrane organization		chloroplast envelope:plastid chromosome:chloroplast thylakoid membrane	ARATHwo_AT3G46780.1	plastid transcriptionally active 16 (PTAC16); FUNCTIONS IN: binding, catalytic activity; INVOLVED IN: metabolic process; LOCATED IN: in 6 components; EXPRESSED IN: 21 plant structures; EXPRESSED DURING: 14 growth stages; CONTAINS InterPro DOMAIN/s: NAD(P)-binding domain (InterPro:IPR016040), NmrA-like (InterPro:IPR008030); BEST Arabidopsis thaliana protein match is: NAD(P)-binding Rossmann-fold s…			gi|593164895|ref|XP_007132038.1|	hypothetical protein PHAVU_011G061600g [Phaseolus vulgaris].	PHYSPtr_m240lflr_YEPO_scaffold-YEPO-2012596-cf._Physcomicromitrium_sp._12_rc	pyridine nucleotide binding protein	pyridine nucleotide binding protein	GO:0003824, GO:0005488, GO:0008152, GO:0009536	41.4112	39.7878	53.384	34.9033	66.1551	45.0207	53.7055	48.8858	44.1089	49.0234	45.8146	60.1738	53.8446	46.8176	55.7773	46.6371	53.8261	59.8715
Pp3c1_14810V3.1		Pp1s230_37V6.1																					6.83163	3.33395	7.74756	0.488839	0.219583	2.92531	8.80637	11.7013	4.44626	3.30132	4.17416	3.7419	2.95547	2.35396	2.47613	2.97798	1.33189	3.10952
Pp3c1_14870V3.1	Pp3c1_14870V1.1	Pp1s230_38V6.1		Pp1s230_38V2.1	Phypa_145591	Phpat.001G057500											gi|743898911|ref|XP_011042746.1|	PREDICTED: MACPF domain-containing protein At1g14780-like [Populus euphratica].	PHYSPtr_m240lflr_YEPO_scaffold-YEPO-2016276-cf._Physcomicromitrium_sp._3	F15D2.24; expressed protein	F15D2.24; expressed protein	GO:0005886	6.13998	6.8581	5.61222	11.4186	6.68705	8.45787	5.30528	4.37927	7.31027	5.59694	6.02016	9.8674	7.9501	6.98421	6.09688	6.65862	8.144	7.02747
Pp3c1_14880V3.1	Pp3c1_14880V1.1	Pp1s230_39V6.1				Phpat.001G057600											gi|747046211|ref|XP_011098252.1|	PREDICTED: uncharacterized protein LOC105176954 isoform X1 [Sesamum indicum].	ENCSTtr_onekp_KEFD_61759				8.04792	8.74995	6.82047	5.46888	4.69092	6.43509	4.62718	4.85547	6.60933	5.34545	5.29438	4.857	5.76663	6.36914	5.57683	6.34337	4.30619	5.88927
Pp3c1_14900V3.1	Pp3c1_14900V1.1	Pp1s230_41V6.1		Pp1s230_41V2.1	Phypa_222325	Phpat.001G057700	0050896:0006810		0016021:0009536	response to stimulus:transport		integral component of membrane:plastid					gi|747044284|ref|XP_011088241.1|	PREDICTED: probable folate-biopterin transporter 7 [Sesamum indicum].	PHYSPtr_m240lflr_YEPO_scaffold-YEPO-2018010-cf._Physcomicromitrium_sp._4	MBG8.12; expressed protein	MBG8.12; expressed protein	GO:0009536, GO:0016020	24.0902	27.6692	23.1958	28.7111	24.2009	26.6372	18.7562	22.1114	21.5443	21.9529	24.3192	23.0596	19.7116	19.5185	20.9757	20.7806	19.926	21.8398
Pp3c1_14910V3.1	Pp3c1_14910V1.1	Pp1s230_42V6.1		Pp1s230_42V2.1	Phypa_170083	Phpat.001G057800	0006810:0010258:0055114	0016655:0048038	0010598:0009535	transport:NADH dehydrogenase complex (plastoquinone) assembly:oxidation-reduction process	oxidoreductase activity, acting on NAD(P)H, quinone or similar compound as acceptor:quinone binding	NAD(P)H dehydrogenase complex (plastoquinone):chloroplast thylakoid membrane					gi|702380375|ref|XP_010063443.1|	PREDICTED: NAD(P)H-quinone oxidoreductase subunit M, chloroplastic [Eucalyptus grandis].	HEDCItr_onekp_YWNF_48484	nadh dehydrogenase i subunit m	nadh dehydrogenase i subunit m	GO:0009523, GO:0009535, GO:0009536, GO:0009579, GO:0016020, GO:0016655, GO:0048038, GO:0055114	28.5654	22.3911	23.9085	21.8019	30.4414	24.1543	16.1038	24.5491	12.7506	10.9957	10.9871	19.0249	16.7501	15.1929	17.3668	12.1317	27.3546	16.3344
Pp3c1_14920V3.1	Pp3c1_14920V1.1	Pp1s230_43V6.1				Phpat.001G057900											gi|672143929|ref|XP_008795851.1|	PREDICTED: uncharacterized protein LOC103711483 isoform X3 [Phoenix dactylifera].	CERPUGG1tr_m240lflr_isotig09860_6_rc				7.69598	9.57963	7.97422	8.79038	8.65712	8.32895	7.77826	8.70393	10.6098	11.2625	8.9478	8.37011	7.52562	8.34456	7.51977	10.2276	7.7542	8.82701
Pp3c1_14930V3.1	Pp3c1_14930V1.1
Pp3c1_14940V3.1	Pp3c1_14940V1.1	Pp1s230_45V6.1		Pp1s230_45V2.1	Phypa_170085	Phpat.001G058000																	0.731593	0.552636	0.165822	0.169263	0.171071	0.325575	2.94708	3.10073	1.03789	1.35058	0.903326	0.981552	0.324299	0.239727	0.309149	0.184132	0.256207	0.504696
Pp3c1_14950V3.1	Pp3c1_14950V1.1																		PHYSPtr_m240lflr_YEPO_scaffold-YEPO-2003639-cf._Physcomicromitrium_sp._3_rc																				0.133999
Pp3c1_14980V3.1	Pp3c1_14980V1.1	Pp1s230_50V6.1		Pp1s230_50V2.1	Phypa_222327	Phpat.001G058100	6606	8565	0005737:0005634	protein import into nucleus	protein transporter activity	cytoplasm:nucleus	ARATHwo_AT1G01830.2	ARM repeat superfamily protein; FUNCTIONS IN: binding; LOCATED IN: cellular_component unknown; EXPRESSED IN: 22 plant structures; EXPRESSED DURING: 13 growth stages; CONTAINS InterPro DOMAIN/s: Armadillo-like helical (InterPro:IPR011989), Armadillo (InterPro:IPR000225), Armadillo-type fold (InterPro:IPR016024); BEST Arabidopsis thaliana protein match is: ARM repeat superfamily protein (TAIR:AT2G4…	sp|Q2U5T5|VAC8_ASPOR	Vacuolar protein 8	gi|743883080|ref|XP_011036930.1|	PREDICTED: importin subunit alpha-1 isoform X1 [Populus euphratica].	PHYSPtr_onekp_YEPO_6081	F3E22.14; importin alpha-1 subunit, putative (IMPA1) [Arabidopsis thaliana]	F3E22.14; importin alpha-1 subunit, putative (IMPA1) [Arabidopsis thaliana]	GO:0005488, GO:0005643, GO:0005737, GO:0006606, GO:0008565, GO:0016020	73.2415	64.5052	30.6197	63.158	27.412	68.0277	40.4374	50.4604	36.015	37.8072	41.8155	42.2248	50.6095	33.2148	37.4447	34.1379	54.8377	43.8888
Pp3c1_15000V3.1		Pp1s230_54V6.1																					0.640906	2.79721		1.18625	1.06571				0.606156			0.458603	0.252533		0.288882	0.860306	0.598528
Pp3c1_15010V3.1	Pp3c1_15010V1.1	Pp1s230_53V6.1		Pp1s230_53V2.1	Phypa_145616												gi|743891730|ref|XP_011039429.1|	PREDICTED: probable LRR receptor-like serine/threonine-protein kinase MRH1 isoform X2 [Populus euphratica].	PLAAStr_onekp_NWQC_154300	receptor protein	receptor protein	GO:0004713, GO:0005524, GO:0005739, GO:0005886, GO:0006468, GO:0016020	11.9573	7.8592	7.26122	6.85773	4.76069	4.59679	8.97324	8.22285	6.45092	4.5419	7.68411	5.96519	5.30873	5.00346	5.99694	6.25448	5.81927	6.95367
Pp3c1_15011V3.1		Pp1s230_53V6.1					0009086:0006468:0000394	0004672:0005524	5886	methionine biosynthetic process:protein phosphorylation:RNA splicing, via endonucleolytic cleavage and ligation	protein kinase activity:ATP binding	plasma membrane	ARATHwo_AT3G58690.1	Protein kinase superfamily protein; FUNCTIONS IN: kinase activity; INVOLVED IN: protein amino acid phosphorylation; LOCATED IN: plasma membrane; EXPRESSED IN: 23 plant structures; EXPRESSED DURING: 13 growth stages; CONTAINS InterPro DOMAIN/s: Protein kinase, ATP binding site (InterPro:IPR017441), Serine/threonine-protein kinase domain (InterPro:IPR002290), Serine/threonine-protein kinase-like do…	sp|O49339|PTI12_ARATH	PTI1-like tyrosine-protein kinase 2	gi|697146946|ref|XP_009627626.1|	PREDICTED: probable LRR receptor-like serine/threonine-protein kinase At1g63430 isoform X2 [Nicotiana tomentosiformis].	PHYSPtr_onekp_YEPO_82140				6.59625	6.87705	5.77565	4.6196	4.3577	5.50071	3.3782	5.39193	6.42408	5.99844	6.59118	4.26711	5.50024	4.39299	3.71248	4.0682	4.81986	5.50977
Pp3c1_15030V3.1	Pp3c1_15030V1.1	Pp1s230_57V6.1																	FUNHY15tr_m240lflr_TR18585_c0_g2_i1_1_rc			GO:0009536
Pp3c1_15040V3.1	Pp3c1_15040V1.1	Pp1s230_57V6.1				Phpat.001G058400													FUNHY15tr_m240lflr_TR18585_c0_g2_i1_1_rc					0.279083		0.170957	0.0767925		0.158751			0.0395389		0.0660917	0.0363939	0.242126	0.0832647			0.037759
Pp3c1_15060V3.1	Pp3c1_15060V1.1	Pp1s230_61V6.1		Pp1s230_61V2.1	Phypa_222331	Phpat.001G058500	0034645:0006464:0044711:0007205:0016310:0045491:0044723:0042546	0004143:0003951		cellular macromolecule biosynthetic process:cellular protein modification process:single-organism biosynthetic process:protein kinase C-activating G-protein coupled receptor signaling pathway:phosphorylation:xylan metabolic process:single-organism carbohydrate metabolic process:cell wall biogenesis	diacylglycerol kinase activity:NAD+ kinase activity						gi|697169457|ref|XP_009593622.1|	PREDICTED: sphingoid long-chain bases kinase 1 [Nicotiana tomentosiformis].	PHYSPtr_onekp_YEPO_13941	sphingosine kinase	sphingosine kinase	GO:0004143, GO:0007205	14.3554	17.3222	13.2456	12.9642	11.3874	14.7041	10.5934	10.9889	13.0851	11.1326	11.0583	12.1577	12.1325	12.2711	10.9562	10.5347	12.7585	11.8505
Pp3c1_15080V3.1																										0.304166		0.130014	0.141225		0.155425	0.140695
Pp3c1_15090V3.1	Pp3c1_15090V1.1	Pp1s230_64V6.1				Phpat.001G058800	9231	0003935:0043167:0000166:0008686	9536	riboflavin biosynthetic process	GTP cyclohydrolase II activity:ion binding:nucleotide binding:3,4-dihydroxy-2-butanone-4-phosphate synthase activity	plastid	ARATHwo_AT5G64300.1	encodes GTP cyclohydrolase II that can functionally complement E. coli mutant deficient in this gene. It also has 3,4-dihydroxy-2-butanone-4-phosphate synthase activity which makes it a bifunctional enzyme involved in the formation of the pyrimidine and of the carbohydrate from GTP and ribulose-5-phosphate, respectively	sp|Q6Z234|RIBA1_ORYSJ	Probable bifunctional riboflavin biosynthesis protein RIBA 1, chloroplastic	gi|514797152|ref|XP_004973726.1|	PREDICTED: probable bifunctional riboflavin biosynthesis protein RIBA 1, chloroplastic [Setaria italica].	FUNHY15tr_m240lflr_TR29553_c0_g2_i3_7_rc	gtp cyclohydrolase	gtp cyclohydrolase	GO:0003935, GO:0008686, GO:0009231, GO:0009536	8.61161	8.9244	2.56652	8.0999	1.98582	5.5533	2.48548	5.34764	2.33584	1.85017	1.71199	3.48797	1.74141	1.63276	1.65517	1.68668	4.46114	1.92629
Pp3c1_15100V3.1	Pp3c1_15100V1.1	Pp1s230_66V6.1		Pp1s230_66V2.1	Phypa_92771	Phpat.001G058900	0009723:0009755:0044723:0009746	16853	5739	response to ethylene:hormone-mediated signaling pathway:single-organism carbohydrate metabolic process:response to hexose	isomerase activity	mitochondrion					gi|567218164|ref|XP_006412711.1|	hypothetical protein EUTSA_v10026665mg [Eutrema salsugineum].	FUNHYGAMtr_m240lflr_Fh.sd_4666_C1_2	F17I23.270; expressed protein [Arabidopsis thaliana]			12.572	11.0264	12.4692	9.62403	7.9972	9.43736	10.5503	13.6179	13.7059	15.441	15.3297	11.6148	9.6996	13.6582	10.6108	17.3288	10.0171	12.1848
Pp3c1_1510V3.1	Pp3c1_1510V1.1
Pp3c1_15110V3.1	Pp3c1_15110V1.1	Pp1s230_68V6.1		Pp1s230_68V2.1	Phypa_170090	Phpat.001G059000													CLIDEtr_onekp_MIRS_12726	hypothetical protein, conserved [Leishmania major]	hypothetical protein, conserved [Leishmania major]	GO:0005829	21.6763	25.1429	16.1115	16.0241	16.0533	18.6556	12.4187	15.2512	11.2202	11.2645	11.4361	13.0652	15.4085	14.9096	13.3573	9.52416	14.1109	13.3719
Pp3c1_15130V3.1	Pp3c1_15130V1.1	Pp1s230_71V6.1		Pp1s230_71V2.1	Phypa_145628	Phpat.001G059100	45040		0005829:0005742	protein import into mitochondrial outer membrane		cytosol:mitochondrial outer membrane translocase complex					gi|727519603|ref|XP_010436145.1|	PREDICTED: uncharacterized protein LOC104719860 [Camelina sativa].	FUNHY15tr_m240lflr_TR3165_c0_g1_i2_10_rc	ph-domain-containing protein	ph-domain-containing protein	GO:0005488, GO:0005739	13.7683	16.2843	13.7154	15.8491	14.3463	16.2456	16.1941	13.0194	15.4088	14.9614	12.9897	14.2579	14.6237	15.2256	15.4945	15.6685	16.0514	16.1671
Pp3c1_15140V3.1	Pp3c1_15140V1.1	Pp1s230_72V6.1																	PHYSPtr_m240lflr_YEPO_scaffold-YEPO-2073538-cf._Physcomicromitrium_sp._4_rc			GO:0016020	9.78482	11.0377	4.13992	2.62605	0.854194	6.03819	13.37	10.882	6.66309	6.03165	5.93729	4.72606	4.74223	8.20804	5.42481	5.12243	3.15255	10.3202
Pp3c1_15150V3.1	Pp3c1_15150V1.1	Pp1s230_73V6.1;Pp1s230_74V6.1		Pp1s230_73V2.1	Phypa_145634	Phpat.001G059200	10264		5739	myo-inositol hexakisphosphate biosynthetic process		mitochondrion					gi|920697107|gb|KOM40332.1|	hypothetical protein LR48_Vigan04g053000 [Vigna angularis].	FUNHY15tr_m240lflr_TR43764_c0_g1_i4_1	thiol-disulphide oxidoreductase dcc	thiol-disulphide oxidoreductase dcc	GO:0005739, GO:0009536	10.5048	11.2601	8.1088	7.47668	7.52369	8.83657	14.7377	14.3617	8.7083	5.60752	6.48906	8.96578	6.00926	7.02262	8.10075	6.28594	6.76669	6.88142
Pp3c1_15160V3.1	Pp3c1_15160V1.1	Pp1s230_73V6.1;Pp1s230_74V6.1		Pp1s230_74V2.1	Phypa_170093	Phpat.001G059300											gi|697169039|ref|XP_009593413.1|	PREDICTED: uncharacterized protein LOC104090080 [Nicotiana tomentosiformis].	PHYSPtr_onekp_YEPO_8310	F5G3.13; DNAJ heat shock N-terminal domain-containing protein [Arabidopsis thaliana]			12.7717	13.9427	10.6788	10.4086	10.365	12.9853	12.3082	10.315	14.5716	16.0325	13.7689	11.5108	12.2033	13.7596	10.1901	13.1911	10.2268	11.8383
Pp3c1_15210V3.1	Pp3c1_15210V1.1	Pp1s230_76V6.1		Pp1s230_76V2.1	Phypa_145635	Phpat.001G059400	0055085:0006364:0032259	0008757:0003723		transmembrane transport:rRNA processing:methylation	S-adenosylmethionine-dependent methyltransferase activity:RNA binding						gi|747099377|ref|XP_011097741.1|	PREDICTED: 25S rRNA (cytosine-C(5))-methyltransferase nop2-like [Sesamum indicum].	PHYSPtr_m240lflr_YEPO_scaffold-YEPO-2013072-cf._Physcomicromitrium_sp._7_rc	nucleolar protein 120kda	nucleolar protein 120kda	GO:0003723, GO:0005515, GO:0006364, GO:0008284, GO:0008757, GO:0009536, GO:0055085	25.3611	38.1572	39.3629	23.0489	33.5982	23.7632	17.887	14.3028	20.1701	19.0445	17.4119	20.4386	22.8794	26.7122	24.0172	20.4601	20.6738	22.4809
Pp3c1_15220V3.1	Pp3c1_15220V1.1	Pp1s230_78V6.1		Pp1s230_78V2.1	Phypa_170095	Phpat.001G059500											gi|743861180|ref|XP_010943208.1|	PREDICTED: PRKR-interacting protein 1 [Elaeis guineensis].	PHYSPtr_m240lflr_YEPO_scaffold-YEPO-2011228-cf._Physcomicromitrium_sp._5_rc			GO:0005634	8.06791	6.30877	8.18456	5.74052	6.92683	7.50556	7.73468	7.47809	8.77121	8.12222	6.69362	7.22354	9.12953	10.4684	9.29235	7.91826	8.06451	8.55213
Pp3c1_15279V3.1																							9.42996	8.28066	16.0966	9.95484	13.7695	11.2189	8.03258	6.29835	9.14277	12.0798	13.1063	11.6982	15.4881	16.5213	17.3329	15.7113	17.9558	14.9358
Pp3c1_15290V3.1	Pp3c1_15290V1.1	Pp1s230_85V6.1		Pp1s230_85V2.1	Phypa_60268	Phpat.001G059600		3677			DNA binding						gi|695069037|ref|XP_009381483.1|	PREDICTED: zinc-finger homeodomain protein 2-like [Musa acuminata subsp. malaccensis].	PHYSPtr_m240lflr_YEPO_scaffold-YEPO-2005139-cf._Physcomicromitrium_sp._2	ZF-HD homeobox protein At4g24660 (AtHB-22)	ZF-HD homeobox protein At4g24660 (AtHB-22)	GO:0003677, GO:0007275, GO:0009507, GO:0016563, GO:0045941	44.3577	36.8552	45.1348	25.6184	36.9654	38.6128	34.8305	34.5138	24.6746	28.9963	29.4676	32.3917	48.8635	51.5414	51.0663	40.8429	50.525	39.532
Pp3c1_15294V3.1																							2.37037	2.67632	0.638786	1.32737	0.508377	1.16461	0.583862	0.860022	0.492636	0.252059	0.255661	0.437536	0.892343	0.395779	0.673718	0.303995	0.803678	0.592522
Pp3c1_15300V3.1	Pp3c1_15300V1.1	Pp1s230_90V6.1		Pp1s230_90V2.1	Phypa_145612	Phpat.001G059700											gi|728845144|gb|KHG24587.1|	Acylphosphatase [Gossypium arboreum].	PHYSPtr_m240lflr_YEPO_scaffold-YEPO-2077917-cf._Physcomicromitrium_sp._1	acylphosphatase	acylphosphatase	GO:0003998	0.436398	0.258549	0.465474	1.21159	0.32014	0.761595	0.727996	0.731134	0.764777	0.758234	0.905608	0.881693	0.5462	0.740224	0.451258	1.27495	0.611314	0.724101
Pp3c1_1530V3.1	Pp3c1_1530V1.1	Pp1s200_49V6.1		Pp1s200_49V2.1	Phypa_193569	Phpat.001G006600	6412	0046872:0003735	0005840:0005739	translation	metal ion binding:structural constituent of ribosome	ribosome:mitochondrion					gi|470128763|ref|XP_004300304.1|	PREDICTED: 60S ribosomal protein L37a [Fragaria vesca subsp. vesca].	PLAINtr_m240lflr_BGXB_scaffold-BGXB-2004490-Plagiomnium_insigne_2_rc	60s ribosomal protein l37a	60s ribosomal protein l37a	GO:0003735, GO:0005739, GO:0005829, GO:0006412, GO:0022625, GO:0042254	299.979	302.169	343.27	283.14	266.019	255.638	280.127	312.878	315.716	277.182	308.884	285.113	304.244	336.109	307.909	317.865	261.516	298.643
Pp3c1_15310V3.1	Pp3c1_15310V1.1	Pp1s230_93V6.1		Pp1s230_93V2.1	Phypa_145621	Phpat.001G059800	0009648:0010229:0006468	0003700:0005524:0004674		photoperiodism:inflorescence development:protein phosphorylation	sequence-specific DNA binding transcription factor activity:ATP binding:protein serine/threonine kinase activity		ARATHwo_AT5G19360.1	member of Calcium Dependent Protein Kinase	sp|Q6FIU2|HOG1_CANGA	Mitogen-activated protein kinase HOG1	gi|14317906|dbj|BAB59136.1|	casein kinase II alpha [Triticum aestivum].	LEUGLtr_onekp_RGKI_3182	casein kinase ii alpha subunit	casein kinase ii alpha subunit	GO:0005524, GO:0006468, GO:0008353, GO:0009536	12.9401	18.2597	16.5876	20.041	17.2164	17.8039	16.3375	13.8281	17.3431	19.6298	20.3256	21.6726	19.9755	19.3587	19.9494	23.5542	18.0801	22.7442
Pp3c1_15380V3.1	Pp3c1_15380V1.1	Pp1s63_215V6.1		Pp1s63_215V2.1	Phypa_49669	Phpat.001G060000			0044424:0005886			intracellular part:plasma membrane	ARATHwo_AT5G64130.3	cAMP-regulated phosphoprotein 19-related protein; FUNCTIONS IN: molecular_function unknown; INVOLVED IN: biological_process unknown; LOCATED IN: plasma membrane; EXPRESSED IN: 24 plant structures; EXPRESSED DURING: 15 growth stages; CONTAINS InterPro DOMAIN/s: cAMP-regulated phosphoprotein/endosulphine conserved region (InterPro:IPR006760); BEST Arabidopsis thaliana protein match is: cAMP-regulat…			gi|593781017|ref|XP_007153549.1|	hypothetical protein PHAVU_003G045000g [Phaseolus vulgaris].	PHYSPtr_m240lflr_YEPO_scaffold-YEPO-2007388-cf._Physcomicromitrium_sp._1	at5g64130 mhj24_11	at5g64130 mhj24_11	GO:0005829, GO:0005886	44.8634	43.6599	41.8368	39.4338	39.7703	45.4965	37.4027	34.7695	36.3143	31.3764	32.5036	31.185	38.3391	35.8418	38.7627	30.7624	33.9529	34.4418
Pp3c1_15390V3.1	Pp3c1_15390V1.1	Pp1s63_214V6.1		Pp1s63_214V2.1	Phypa_127206	Phpat.001G060100	0022900:0042732:0006499	4128	0016021:0005741:0009505:0005783:0005886	electron transport chain:D-xylose metabolic process:N-terminal protein myristoylation	cytochrome-b5 reductase activity, acting on NAD(P)H	integral component of membrane:mitochondrial outer membrane:plant-type cell wall:endoplasmic reticulum:plasma membrane	ARATHwo_AT5G17770.1	Encodes NADH:cytochrome (Cyt) b5 reductase that displayed strict specificity to NADH for the reduction of a recombinant Cyt b5 (AtB5-A), whereas no Cyt b5 reduction was observed when NADPH was used as the electron donor.	sp|Q9ZNT1|NB5R1_ARATH	NADH--cytochrome b5 reductase 1	gi|242059053|ref|XP_002458672.1|	hypothetical protein SORBIDRAFT_03g037870 [Sorghum bicolor].	PHYSPtr_m240lflr_YEPO_scaffold-YEPO-2005214-cf._Physcomicromitrium_sp._1	nadh:cytochrome b5 reductase	nadh:cytochrome b5 reductase	GO:0004128, GO:0009055, GO:0016020, GO:0016023, GO:0055114	18.8124	13.1969	19.6737	16.0098	14.3932	16.7945	18.3371	15.5205	16.1308	14.8842	15.4597	13.4089	22.6703	21.9072	20.5224	16.0488	15.5519	17.2964
Pp3c1_15400V3.1	Pp3c1_15400V1.1	Pp1s63_213V6.1		Pp1s63_213V2.1	Phypa_109862	Phpat.001G060200	55114	0020037:0032440:0005496	0005829:0005634	oxidation-reduction process	heme binding:2-alkenal reductase [NAD(P)] activity:steroid binding	cytosol:nucleus					gi|743882311|ref|XP_011036712.1|	PREDICTED: probable steroid-binding protein 3 [Populus euphratica].	PHYSPtr_onekp_YEPO_12667	membrane steroid-binding protein 1	membrane steroid-binding protein 1	GO:0016023, GO:0020037, GO:0032440, GO:0055114	53.8984	44.2187	59.17	43.3965	48.7335	44.0459	95.3669	100.761	107.341	108.925	107.298	79.6744	78.6922	109.212	82.9034	115.901	62.0676	77.9398						1.12005
Pp3c1_15410V3.1	Pp3c1_15410V1.1	Pp1s63_211V6.1;Pp1s63_212V6.1		Pp1s63_211V2.1	Phypa_127167	Phpat.001G060400		3677			DNA binding		ARATHwo_AT4G33280.1	AP2/B3-like transcriptional factor family protein; FUNCTIONS IN: DNA binding, sequence-specific DNA binding transcription factor activity; INVOLVED IN: regulation of transcription, DNA-dependent; LOCATED IN: vacuole; CONTAINS InterPro DOMAIN/s: Transcriptional factor B3 (InterPro:IPR003340); BEST Arabidopsis thaliana protein match is: AP2/B3-like transcriptional factor family protein (TAIR:AT3G18…	sp|Q8RYD1|REM16_ARATH	B3 domain-containing protein REM16	gi|695006114|ref|XP_009389535.1|	PREDICTED: B3 domain-containing protein Os11g0197600-like isoform X2 [Musa acuminata subsp. malaccensis].	CERPUGG1tr_m240lflr_isotig16148_10_rc	K13E13.10; transcriptional factor B3 family protein	K13E13.10; transcriptional factor B3 family protein	GO:0003677, GO:0005634, GO:0006355	1.83178	1.91036	3.03097	1.33453	1.9118	1.6188	3.06463	2.71343	4.40487	3.45355	4.1798	3.09557	4.56095	5.24459	4.69043	4.67355	3.00275	3.792
Pp3c1_15430V3.1	Pp3c1_15430V1.1	Pp1s63_210V6.1				Phpat.001G060500							ARATHwo_AT3G13510.1	Protein of Unknown Function (DUF239); INVOLVED IN: biological_process unknown; LOCATED IN: endomembrane system; EXPRESSED IN: 22 plant structures; EXPRESSED DURING: 13 growth stages; CONTAINS InterPro DOMAIN/s: Protein of unknown function DUF239, plant (InterPro:IPR004314); BEST Arabidopsis thaliana protein match is: Protein of Unknown Function (DUF239) (TAIR:AT1G55360.1); Has 759 Blast hits to 7…			gi|218189831|gb|EEC72258.1|	hypothetical protein OsI_05401 [Oryza sativa Indica Group].	PHYSPtr_m240lflr_YEPO_scaffold-YEPO-2081202-cf._Physcomicromitrium_sp._5_rc				0.0369398	0.0372052		0.102557	0.0460681	0.0438374	0.19047	0.1002				0.158595	0.0436657				0.103492
Pp3c1_15440V3.1	Pp3c1_15440V1.1	Pp1s63_209V6.1		Pp1s63_209V2.1	Phypa_164003														PHYSPtr_m240lflr_YEPO_scaffold-YEPO-2081667-cf._Physcomicromitrium_sp._5_rc				4.39125	5.20145	4.13079	2.04624	1.98615	3.87171	12.4573	10.758	5.79102	5.24222	6.04389	5.44349	3.50927	3.72902	3.76348	4.1303	3.53052	4.34253
Pp3c1_15460V3.1	Pp3c1_15460V1.1	Pp1s63_208V6.1				Phpat.001G060700	0009648:0006468:0010229	0008353:0005524:0003700	0005829:0009507	photoperiodism:protein phosphorylation:inflorescence development	RNA polymerase II carboxy-terminal domain kinase activity:ATP binding:sequence-specific DNA binding transcription factor activity	cytosol:chloroplast	ARATHwo_AT2G23070.1	Protein kinase superfamily protein; FUNCTIONS IN: protein serine/threonine kinase activity, protein kinase activity, kinase activity, ATP binding; INVOLVED IN: protein amino acid phosphorylation; LOCATED IN: chloroplast; EXPRESSED IN: 24 plant structures; EXPRESSED DURING: 15 growth stages; CONTAINS InterPro DOMAIN/s: Protein kinase, ATP binding site (InterPro:IPR017441), Protein kinase, catalyti…	sp|O64816|CSK2P_ARATH	Casein kinase II subunit alpha, chloroplastic	gi|565397685|ref|XP_006364417.1|	PREDICTED: casein kinase II subunit alpha, chloroplastic-like [Solanum tuberosum].	PHYSPtr_onekp_YEPO_7501				24.9205	21.7791	28.1324	20.5938	19.6642	20.4108	27.0915	24.5916	23.6309	23.5083	25.0355	23.5587	28.6888	29.8776	30.9999	29.0262	26.4021	27.3177
Pp3c1_15490V3.1	Pp3c1_15490V1.1	Pp1s63_206V6.1		Pp1s63_206V2.1	Phypa_127106	Phpat.001G060800							ARATHwo_AT4G12840.1	Protein of unknown function (DUF707); CONTAINS InterPro DOMAIN/s: Protein of unknown function DUF707 (InterPro:IPR007877); BEST Arabidopsis thaliana protein match is: Protein of unknown function (DUF707) (TAIR:AT4G18530.1); Has 319 Blast hits to 319 proteins in 27 species: Archae - 0; Bacteria - 13; Metazoa - 0; Fungi - 0; Plants - 303; Viruses - 0; Other Eukaryotes - 3 (source: NCBI BLink).			gi|923515198|ref|XP_013645441.1|	PREDICTED: uncharacterized protein LOC106350042 isoform X1 [Brassica napus].	PHYSPtr_m240lflr_YEPO_scaffold-YEPO-2006309-cf._Physcomicromitrium_sp._4_rc	at1g11170 t28p6_16	at1g11170 t28p6_16	GO:0016020, GO:0016023	20.8409	12.9448	13.157	12.3391	16.4709	14.5189	18.3084	20.4271	14.5315	13.61	12.6939	13.9792	14.1238	13.8457	13.3711	13.3347	15.006	14.0501
Pp3c1_15500V3.1	Pp3c1_15500V1.1	Pp1s63_205V6.1		Pp1s63_205V2.1	Phypa_77236	Phpat.001G060900	31047			gene silencing by RNA							gi|743841744|ref|XP_010937610.1|	PREDICTED: factor of DNA methylation 1-like [Elaeis guineensis].	PHYSPtr_onekp_YEPO_16041	contains ESTs C26591(C12654),AU092359(C12654),AU162300(E51189),AU030528 (E51189) [Oryza sativa (japonica cultivar-group)]			17.0721	12.5626	15.3981	9.38154	8.61843	12.4874	69.2799	58.7184	30.9151	25.6661	33.6729	33.2107	16.7934	22.5659	18.2989	18.2296	12.2104	19.5495				-1.46373		1.60243	1.81941
Pp3c1_15510V3.1	Pp3c1_15510V1.1					Phpat.001G061000													RACELtr_m240lflr_ABCD_scaffold-ABCD-2065438-Niphotrichum_elongatum_2_rc				8.28982	9.3985	5.71885	2.81165	1.67795	5.76873	46.269	41.0876	29.6784	25.9183	33.5629	24.2242	16.2123	17.5214	17.3134	20.2162	11.1261	25.7097				-1.19806		3.02889	2.32212		2.47579
Pp3c1_15530V3.1	Pp3c1_15530V1.1	Pp1s63_199V6.1;Pp1s63_200V6.1		Pp1s63_200V2.1	Phypa_127097												gi|661889141|emb|CDP07584.1|	unnamed protein product [Coffea canephora].	CERPUGG1tr_m240lflr_isotig14138_1	F16N3.18; expressed protein [Arabidopsis thaliana]			1.42911	0.861731	1.23885	0.591674	0.515918	0.412833	0.412073	0.280536	0.386814	0.27771	0.451095	0.272471	0.477899	0.246467	0.406837	0.252412	0.289752	0.368986
Pp3c1_15560V3.1	Pp3c1_15560V1.1	Pp1s63_198V6.1		Pp1s63_198V2.1	Phypa_183191	Phpat.001G061300	0009987:0044699			cellular process:single-organism process							gi|695040744|ref|XP_009407962.1|	PREDICTED: scarecrow-like protein 28 isoform X1 [Musa acuminata subsp. malaccensis].	PHYSPtr_m240lflr_YEPO_scaffold-YEPO-2002090-cf._Physcomicromitrium_sp._8_rc	gras family transcription factor	gras family transcription factor	GO:0003700, GO:0005634, GO:0006350, GO:0010200	2.76838	3.78783	4.31893	3.04538	4.7553	3.3349	7.28533	6.95673	6.65438	6.39941	6.10305	5.77459	5.45817	5.81936	5.73527	4.75377	5.59017	5.31698
Pp3c1_15620V3.1	Pp3c1_15620V1.1	Pp1s63_192V6.1;Pp1s63_193V6.1																					1.02343	2.08065	1.05388	0.438485	0.141814	0.404843	4.49525	3.16164	2.63494	1.5577	1.36396	1.85114	0.403257	0.670709	0.640695	0.86497	0.132744	0.674061
Pp3c1_15635V3.1		Pp1s63_188V6.1;Pp1s63_189V6.1																					0.753022	0.202248	0.283201	0.0929176	0.125214	0.119151	0.73341	0.521996	0.522276	0.343841	0.401431	0.359219	0.257149	0.175466	0.135767	0.0673869	0.140646	0.164181
Pp3c1_15680V3.1	Pp3c1_15680V1.1	Pp1s63_181V6.1;Pp1s63_184V6.1		Pp1s63_181V2.1	Phypa_13874												gi|695036155|ref|XP_009405522.1|	PREDICTED: DELLA protein GAI-like [Musa acuminata subsp. malaccensis].	FUNHY15tr_m240lflr_TR12952_c0_g2_i3_17_rc	T27F4.10; gibberellin regulatory protein (RGL1) [Arabidopsis thaliana]	T27F4.10; gibberellin regulatory protein (RGL1) [Arabidopsis thaliana]	GO:0003700, GO:0010200	12.1377	8.90092	6.11785	11.7208	6.12058	7.80263	10.1969	10.0132	11.1859	9.84187	12.2547	10.6906	10.3259	7.96005	9.91439	7.96939	10.0086	12.2779
Pp3c1_15690V3.1	Pp3c1_15690V1.1	Pp1s63_179V6.1		Pp1s63_179V2.1	Phypa_127160	Phpat.001G061800			10287			plastoglobule					gi|697131617|ref|XP_009619863.1|	PREDICTED: DCC family protein At1g52590, chloroplastic [Nicotiana tomentosiformis].	PHYSPtr_m240lflr_YEPO_scaffold-YEPO-2076574-cf._Physcomicromitrium_sp._2	thioldisulphide oxidoreductase dcc	thioldisulphide oxidoreductase dcc	GO:0009536	13.4883	7.87865	13.0353	8.62624	12.901	8.97947	9.18834	14.4763	11.4086	9.24779	9.49105	11.4564	7.95047	6.42009	9.09485	7.94883	12.2892	7.48659
Pp3c1_1570V3.1	Pp3c1_1570V1.1	Pp1s200_47V6.1		Pp1s200_47V2.1	Phypa_220810	Phpat.001G006700											gi|922443552|ref|XP_013626265.1|	PREDICTED: cytochrome b-c1 complex subunit 8-like isoform X2 [Brassica oleracea var. oleracea].	CERPUGG1tr_m240lflr_isotig23204_2_rc	ubiquinol-cytochrome c reductase complex ubiquinone-binding protein qp-c	ubiquinol-cytochrome c reductase complex ubiquinone-binding protein qp-c	GO:0005750, GO:0016020, GO:0016491	27.3468	16.8138	32.4298	13.2251	22.3583	21.3528	25.0361	24.4032	22.0244	17.1009	20.7157	22.4499	43.7667	40.2709	48.7489	34.7901	35.942	35.8487
Pp3c1_15730V3.1	Pp3c1_15730V1.1	Pp1s63_173V6.1		Pp1s63_173V2.1	Phypa_127096	Phpat.001G062000	6468	0004674:0005524:0004713	0016023:0016020	protein phosphorylation	protein serine/threonine kinase activity:ATP binding:protein tyrosine kinase activity	cytoplasmic membrane-bounded vesicle:membrane	ARATHwo_AT1G25320.1	Leucine-rich repeat protein kinase family protein; FUNCTIONS IN: protein serine/threonine kinase activity, kinase activity, ATP binding; INVOLVED IN: transmembrane receptor protein tyrosine kinase signaling pathway, protein amino acid phosphorylation; LOCATED IN: plasma membrane; EXPRESSED IN: 20 plant structures; EXPRESSED DURING: 11 growth stages; CONTAINS InterPro DOMAIN/s: Protein kinase, cat…	sp|P47735|RLK5_ARATH	Receptor-like protein kinase 5	gi|565489623|ref|XP_006302451.1|	hypothetical protein CARUB_v10020537mg [Capsella rubella].	CERPUGG1tr_m240lflr_isotig15053_7_rc	brassinosteroid insensitive 1-associated receptor kinase 1	brassinosteroid insensitive 1-associated receptor kinase 1	GO:0004674, GO:0005515, GO:0005524, GO:0006468, GO:0016020, GO:0044464	12.575	8.92142	7.06737	10.3529	7.39379	8.50155	6.12611	10.7531	7.12591	6.19379	5.39487	8.8508	7.18897	5.51976	5.67867	6.12662	10.1836	7.40092
Pp3c1_15740V3.1	Pp3c1_15740V1.1	Pp1s63_172V6.1		Pp1s63_172V2.1	Phypa_210582	Phpat.001G062100		0003676:0000166			nucleic acid binding:nucleotide binding						gi|672129934|ref|XP_008788488.1|	PREDICTED: splicing factor 3B subunit 6-like protein [Phoenix dactylifera].	FUNHYSPOtr_m240lflr_Fh.sd_1295_C1_1	14 kda subunit splicing factor 3b	14 kda subunit splicing factor 3b	GO:0000166, GO:0003676	29.1226	26.5878	29.2994	22.2856	24.2909	20.9593	32.0913	30.2817	27.1438	23.0432	24.2597	27.1577	29.8721	31.399	29.3023	27.8689	24.1263	27.4594
Pp3c1_15750V3.1	Pp3c1_15750V1.1	Pp1s63_171V6.1		Pp1s63_171V2.1	Phypa_183181	Phpat.001G062200	6606	8565	0005737:0005634	protein import into nucleus	protein transporter activity	cytoplasm:nucleus			sp|Q22560|IMA1_CAEEL	Importin subunit alpha-1	gi|720010919|ref|XP_010259399.1|	PREDICTED: importin subunit alpha-1 [Nelumbo nucifera].	PHYSPtr_m240lflr_YEPO_scaffold-YEPO-2018159-cf._Physcomicromitrium_sp._5_rc	F3E22.14; importin alpha-1 subunit, putative (IMPA1) [Arabidopsis thaliana]	F3E22.14; importin alpha-1 subunit, putative (IMPA1) [Arabidopsis thaliana]	GO:0005488, GO:0005643, GO:0005730, GO:0005829, GO:0006606, GO:0008565, GO:0016020	11.5803	12.5493	15.9873	13.8371	17.3669	13.8393	13.0591	8.32788	12.7085	10.9394	11.7676	13.6707	15.6526	15.8829	18.4121	14.1234	15.3321	14.6816
Pp3c1_15780V3.1	Pp3c1_15780V1.1	Pp1s63_167V6.1;Pp1s63_169V6.1		Pp1s63_167V2.1	Phypa_183177	Phpat.001G062300	8152	0019706:0008270	16021	metabolic process	protein-cysteine S-palmitoyltransferase activity:zinc ion binding	integral component of membrane					gi|823138830|ref|XP_012469253.1|	PREDICTED: protein S-acyltransferase 10 isoform X3 [Gossypium raimondii].	RACELtr_onekp_ABCD_7770	F26O13.30; zinc finger (DHHC type) family protein	F26O13.30; zinc finger (DHHC type) family protein	GO:0005576, GO:0005618, GO:0005783, GO:0005886, GO:0008270, GO:0016020	1.30959	0.873622	0.925184	0.755505	0.509052	0.706421	1.09619	1.89148	1.32706	0.786302	1.056	1.60643	1.3671	1.02544	0.827933	0.730556	1.02446	1.54353
Pp3c1_15810V3.1	Pp3c1_15810V1.1	Pp1s63_164V6.1		Pp1s63_164V2.1	Phypa_77216	Phpat.001G062400	0071805:0009651:0006814	15079	0005886:0016021	potassium ion transmembrane transport:response to salt stress:sodium ion transport	potassium ion transmembrane transporter activity	plasma membrane:integral component of membrane					gi|813209833|dbj|GAO49218.1|	hypothetical protein G7K_3375-t2 [Saitoella complicata NRRL Y-17804].	FUNHY15tr_m240lflr_TR4758_c0_g1_i1_4_rc	potassium transport protein 1	potassium transport protein 1	GO:0006812, GO:0008324, GO:0016020, GO:0055085	4.19129	0.516604	0.744049	0.447556	0.0365525	1.33913	0.39671	1.35156	0.0415809	0.0941008	0.0620397	0.581992	12.2475	7.72173	8.12481	8.41945	6.71291	3.50472
Pp3c1_15830V3.1	Pp3c1_15830V1.1	Pp1s63_162V6.1		Pp1s63_162V2.1	Phypa_183175	Phpat.001G062500	6412	3735	15934	translation	structural constituent of ribosome	large ribosomal subunit					gi|586678858|ref|XP_006840139.1|	PREDICTED: 60S ribosomal protein L13a-4 [Amborella trichopoda].	CERPUGG1tr_m240lflr_isotig21249_3_rc	60s ribosomal protein	60s ribosomal protein	GO:0003735, GO:0005515, GO:0006412, GO:0015934	127.642	159.338	159.933	162.733	147.401	139.985	124.734	142.378	143.254	154.602	163.693	136.111	137.374	149.534	139.594	147.714	136.592	127.677
Pp3c1_15840V3.1	Pp3c1_15840V1.1	Pp1s63_161V6.1		Pp1s63_161V2.1	Phypa_57381	Phpat.001G062600	6412	0046872:0003735	5840	translation	metal ion binding:structural constituent of ribosome	ribosome					gi|351723661|ref|NP_001236263.1|	uncharacterized protein LOC100499804 [Glycine max].	FUNHY15tr_m240lflr_TR11190_c0_g1_i2_1_rc	40s ribosomal protein	40s ribosomal protein	GO:0003735, GO:0005840, GO:0006412, GO:0008270	783.032	906.159	910.459	860.455	808.454	761.897	580.753	728.888	727.363	718.041	783.635	652.904	742.181	759.243	685.413	726.219	612.005	649.597
Pp3c1_15860V3.1	Pp3c1_15860V1.1																gi|760438795|ref|XP_011396466.1|	1-acyl-sn-glycerol-3-phosphate acyltransferase 1, chloroplastic, partial [Auxenochlorella protothecoides].												1.39877			0.207908	0.948834		0.386226
Pp3c1_15890V3.1		Pp1s63_154V6.1																	CERPUGG1tr_m240lflr_isotig13596_18_rc				1.88594	1.18401	1.01072	0.541055	0.384157	1.20857	7.01774	4.04137	3.4336	2.23629	2.95405	3.54242	1.59025	1.66443	1.70864	1.85647	0.818977	2.01997
Pp3c1_15900V3.1	Pp3c1_15900V1.1																						0.200283				0.249776			1.35818	0.852407				0.23675	1.05005	0.270827	0.268845	0.28056
Pp3c1_15940V3.1	Pp3c1_15940V1.1	Pp1s63_149V6.1		Pp1s63_149V2.1	Phypa_127192	Phpat.001G062700											gi|727429442|ref|XP_010480215.1|	PREDICTED: uncharacterized protein At1g01500 [Camelina sativa].	PHYSPtr_m240lflr_YEPO_scaffold-YEPO-2081447-cf._Physcomicromitrium_sp._1	F22L4.17; expressed protein [Arabidopsis thaliana]	F22L4.17; expressed protein [Arabidopsis thaliana]	GO:0016020	13.9444	16.0699	15.9003	17.5878	16.1981	17.7414	16.8703	20.0301	17.3741	21.337	22.0964	21.7252	22.0558	19.1197	20.3716	17.9657	20.5265	21.7106
Pp3c1_15950V3.1	Pp3c1_15950V1.1	Pp1s63_147V6.1;Pp1s63_148V6.1		Pp1s63_148V2.1	Phypa_77207	Phpat.001G062800											gi|302764880|ref|XP_002965861.1|	hypothetical protein SELMODRAFT_406960 [Selaginella moellendorffii].	PHYSPtr_m240lflr_YEPO_scaffold-YEPO-2076954-cf._Physcomicromitrium_sp._1				3.61316	7.12969	3.38724	1.05773	0.413818	2.10016	11.6915	11.5009	6.85195	5.96587	4.89053	5.10487	5.88356	6.81376	6.23188	8.21538	3.15045	8.18422
Pp3c1_15970V3.1	Pp3c1_15970V1.1	Pp1s63_144V6.1		Pp1s63_144V2.1	Phypa_77206												gi|326493030|dbj|BAJ84976.1|	predicted protein [Hordeum vulgare subsp. vulgare].	FUNHY15tr_m240lflr_TR1810_c0_g1_i1_5_rc	MTH12.21; expressed protein [Arabidopsis thaliana]			1.02204	0.759171	0.741295	0.756677	1.2268	1.0916	0.708141	0.57179	0.924338	1.18128	0.937452	0.685619	1.75179	1.79172	1.65843	1.69775	1.14536	1.1281
Pp3c1_15980V3.1	Pp3c1_15980V1.1	Pp1s63_145V6.1		Pp1s63_144V2.1	Phypa_77206															MTH12.21; expressed protein [Arabidopsis thaliana]												0.316565				0.48464
Pp3c1_16001V3.1		Pp1s63_141V6.1																					0.29227	0.546686	0.252364	0.07728		0.198197	0.861149	1.0193	0.651569	0.536201	1.00162	0.313702	0.19742	0.109452	0.451673	0.336276		0.256032
Pp3c1_16010V3.1	Pp3c1_16010V1.1	Pp1s63_141V6.1		Pp1s63_141V2.1	Phypa_163992																		2.05638	3.43811	1.93896	1.63664	1.23098	2.29394	4.55937	4.90863	5.89301	3.69721	4.64291	3.22248	3.98651	4.85158	4.67155	2.4291	3.22629	3.78297
Pp3c1_16110V3.1	Pp3c1_16110V1.1	Pp1s63_130V6.1				Phpat.001G063000	0044763:0007275:0050896:0006468:0048856	0004674:0005524		single-organism cellular process:multicellular organismal development:response to stimulus:protein phosphorylation:anatomical structure development	protein serine/threonine kinase activity:ATP binding		ARATHwo_AT3G24240.1	Leucine-rich repeat receptor-like protein kinase family protein; FUNCTIONS IN: protein serine/threonine kinase activity, protein kinase activity, ATP binding; INVOLVED IN: transmembrane receptor protein tyrosine kinase signaling pathway, protein amino acid phosphorylation; LOCATED IN: endomembrane system; EXPRESSED IN: root; CONTAINS InterPro DOMAIN/s: Protein kinase, ATP binding site (InterPro:I…	sp|Q9LHP4|RCH2_ARATH	Receptor-like protein kinase 2	gi|702250539|ref|XP_010061291.1|	PREDICTED: leucine-rich repeat receptor protein kinase EXS [Eucalyptus grandis].	FUNHY15tr_m240lflr_TR19834_c0_g2_i3_2				6.80322	10.9278	7.30511	6.91426	6.16698	8.14646	7.39391	6.77963	9.04151	8.50022	8.97177	9.16473	10.0206	8.75603	7.79774	9.26615	9.51932	9.4548
Pp3c1_16170V3.1	Pp3c1_16170V1.1	Pp1s63_123V6.1		Pp1s63_123V2.1	Phypa_163991	Phpat.001G063100			5739			mitochondrion					gi|672185885|ref|XP_008812941.1|	PREDICTED: 60S ribosomal protein L24-like isoform X1 [Phoenix dactylifera].	PHYSPtr_m240lflr_YEPO_scaffold-YEPO-2004322-cf._Physcomicromitrium_sp._2	60s ribosomal protein l24	60s ribosomal protein l24	GO:0003735, GO:0005739, GO:0005840, GO:0006412	157.575	177.492	180.09	199.396	186.551	167.796	180.127	181.576	174.467	168.019	167.808	168.476	210.954	217.938	209.14	205.746	183.51	185.78
Pp3c1_16240V3.1	Pp3c1_16240V1.1	Pp1s63_120V6.1		Pp1s63_120V2.1	Phypa_127213		6464			cellular protein modification process					sp|Q3SZH6|TTLL9_BOVIN	Probable tubulin polyglutamylase TTLL9	gi|813163887|ref|XP_012203004.1|	hypothetical protein SPRG_08375 [Saprolegnia parasitica CBS 223.65].	SCHFAtr_onekp_IGUH_7690	tubulin tyrosine ligase	tubulin tyrosine ligase	GO:0004835, GO:0006464, GO:0042995, GO:0043229	7.26833	6.28836	4.53609	2.65556	2.0449	4.82729	26.5836	21.5759	9.70745	8.747	10.3455	11.2028	7.00756	7.7288	7.97358	8.23269	5.34479	8.72063				-1.35051			1.67753
Pp3c1_16250V3.1	Pp3c1_16250V1.1	Pp1s63_119V6.1		Pp1s63_119V2.1	Phypa_163990	Phpat.001G063300	0048653:0016126:0010075:0007020:0006084:0009102:0016132	0008270:0051539:0051537:0004076	5739	anther development:sterol biosynthetic process:regulation of meristem growth:microtubule nucleation:acetyl-CoA metabolic process:biotin biosynthetic process:brassinosteroid biosynthetic process	zinc ion binding:4 iron, 4 sulfur cluster binding:2 iron, 2 sulfur cluster binding:biotin synthase activity	mitochondrion					gi|674915312|emb|CDY17930.1|	BnaC04g02890D [Brassica napus].	PHYSPtr_onekp_YEPO_10559	biotin synthase	biotin synthase	GO:0004076, GO:0005506, GO:0005739, GO:0009102, GO:0009536, GO:0051537, GO:0051539	13.7351	17.0794	18.1476	18.2029	18.1094	18.5617	15.3497	10.9532	14.3842	13.5257	14.0582	15.4383	22.1589	19.4965	21.7614	16.7225	16.5429	17.4474
Pp3c1_16260V3.1	Pp3c1_16260V1.1	Pp1s63_117V6.1;Pp1s63_118V6.1											ARATHwo_AT5G11580.1	Regulator of chromosome condensation (RCC1) family protein; CONTAINS InterPro DOMAIN/s: Regulator of chromosome condensation/beta-lactamase-inhibitor protein II (InterPro:IPR009091), Regulator of chromosome condensation, RCC1 (InterPro:IPR000408); BEST Arabidopsis thaliana protein match is: Regulator of chromosome condensation (RCC1) family protein (TAIR:AT5G63860.1); Has 30201 Blast hits to 1732…	sp|Q9UGK8|SRGEF_HUMAN	Secretion-regulating guanine nucleotide exchange factor	gi|218188983|gb|EEC71410.1|	hypothetical protein OsI_03583 [Oryza sativa Indica Group].	FUNHY15tr_m240lflr_TR43525_c0_g1_i1_2				6.33448	7.11234	8.35046	6.98808	8.63225	6.95308	5.71406	3.64131	7.16146	7.4166	7.47857	6.42378	8.51266	10.0438	9.73796	9.19745	6.93422	6.17381
Pp3c1_16390V3.1		Pp1s63_108V6.1;Pp1s63_110V6.1				Phpat.001G063700			5634			nucleus					gi|590723983|ref|XP_007052335.1|	Mago nashi family protein [Theobroma cacao].	PHIFOtr_onekp_ORKS_883				9.10377	7.55539	8.09972	4.04403	6.2671	5.18577	9.10659	7.50704	10.6422	6.07948	8.83846	9.30234	8.4369	12.4097	11.3255	9.97172	8.77388	6.60969
Pp3c1_16430V3.1	Pp3c1_16430V1.1	Pp1s63_106V6.1				Phpat.001G063800	0016036:0019375:0000911:0042631:0010118:0006468:0019722:0010107:0009738:0009723:0007584	0005267:0004674:0005524	0009536:0005829:0005886:0005634	cellular response to phosphate starvation:galactolipid biosynthetic process:cytokinesis by cell plate formation:cellular response to water deprivation:stomatal movement:protein phosphorylation:calcium-mediated signaling:potassium ion import:abscisic acid-activated signaling pathway:response to ethylene:response to nutrient	potassium channel activity:protein serine/threonine kinase activity:ATP binding	plastid:cytosol:plasma membrane:nucleus					gi|302808732|ref|XP_002986060.1|	hypothetical protein SELMODRAFT_234951 [Selaginella moellendorffii].	RAPRA_RrC8267_p1			GO:0004672, GO:0005524, GO:0006468, GO:0007165	2.9335	4.88146	1.69598	1.59347	0.556714	1.89199	4.5213	6.9193	2.44272	2.62072	1.25986	2.73793	0.904596	1.25379	1.5522	1.88326	0.535995	2.03348
Pp3c1_16440V3.1	Pp3c1_16440V1.1	Pp1s63_105V6.1		Pp1s63_105V2.1	Phypa_109861	Phpat.001G063900	0007067:0010183:0009793		0035145:0005730:0016607:0009507	mitotic nuclear division:pollen tube guidance:embryo development ending in seed dormancy		exon-exon junction complex:nucleolus:nuclear speck:chloroplast					gi|823147714|ref|XP_012473772.1|	PREDICTED: protein mago nashi homolog [Gossypium raimondii].	PHYSPtr_m240lflr_YEPO_scaffold-YEPO-2008195-cf._Physcomicromitrium_sp._4_rc	protein mago nashi	protein mago nashi	GO:0005634	75.7232	64.9614	74.8782	65.7922	61.9559	66.3419	90.6394	84.7631	61.0186	61.8491	65.4514	70.6196	77.424	75.2639	71.0851	79.3172	66.063	75.4213
Pp3c1_16461V3.1		Pp1s63_102V6.1																						0.0627554		0.00961044	0.0129508		0.0803185	0.0140843				0.0111462	0.0122754	0.0680563	0.0280847		0.014547
Pp3c1_16480V3.1	Pp3c1_16480V1.1	Pp1s63_99V6.1		Pp1s63_99V2.1	Phypa_127149	Phpat.001G064000	0019243:0006869	0005524:0005319	0016021:0009706:0009707	methylglyoxal catabolic process to D-lactate:lipid transport	ATP binding:lipid transporter activity	integral component of membrane:chloroplast inner membrane:chloroplast outer membrane					gi|848849683|ref|XP_012831361.1|	PREDICTED: protein TRIGALACTOSYLDIACYLGLYCEROL 1, chloroplastic [Erythranthe guttata].	PHYSPtr_m240lflr_YEPO_scaffold-YEPO-2079933-cf._Physcomicromitrium_sp._2	tgd1 (trigalactosyldiacylglycerol 1) lipid transporter	tgd1 (trigalactosyldiacylglycerol 1) lipid transporter	GO:0005319, GO:0006869, GO:0009536, GO:0009706, GO:0009707, GO:0016020	11.5318	13.6634	14.6272	14.6585	15.2582	15.6198	14.2097	13.5102	17.6967	17.998	16.104	15.219	13.9497	13.723	13.9958	14.8772	15.3578	14.7114
Pp3c1_16490V3.1	Pp3c1_16490V1.1	Pp1s63_97V6.1		Pp1s63_97V2.1	Phypa_183160	Phpat.001G064100											gi|695006017|ref|XP_009389481.1|	PREDICTED: uncharacterized protein LOC103976031 [Musa acuminata subsp. malaccensis].	PHYSPtr_onekp_YEPO_79865	holocarboxylase synthetase			28.9681	28.9624	27.0908	27.8493	23.5285	27.401	30.9128	33.503	34.292	32.3232	32.3728	29.9762	25.2115	26.3695	26.0855	25.0115	23.9907	24.2052
Pp3c1_16491V3.1																			FUNHY15tr_m240lflr_TR23200_c0_g1_i1_1_rc				0.430689	2.85057	1.11565	1.02492	0.537117	1.82539	1.42761	0.417234	0.785579	0.948175	0.955047	1.05662	0.581836	0.725796	0.748783	1.65179	1.98233	0.830034
Pp3c1_16500V3.1	Pp3c1_16500V1.1	Pp1s63_96V6.1		Pp1s63_96V2.1	Phypa_127138	Phpat.001G064200	0009657:0015718:0098656	8028	31969	plastid organization:monocarboxylic acid transport:anion transmembrane transport	monocarboxylic acid transmembrane transporter activity	chloroplast membrane					gi|565372686|ref|XP_006352920.1|	PREDICTED: plastidal glycolate/glycerate translocator 1, chloroplastic-like [Solanum tuberosum].	PHYSPtr_onekp_YEPO_10979	conserved hypothetical protein	conserved hypothetical protein	GO:0009536, GO:0016020	24.2072	18.293	20.3147	23.5266	31.3654	28.2356	18.1627	15.7761	12.7719	12.9012	14.0349	23.7431	24.8648	17.7561	28.8109	20.4862	43.2181	26.4985
Pp3c1_1650V3.1	Pp3c1_1650V1.1	Pp1s200_41V6.1		Pp1s200_41V2.1	Phypa_17294	Phpat.001G006800		0003682:0003677			chromatin binding:DNA binding						gi|302760923|ref|XP_002963884.1|	hypothetical protein SELMODRAFT_80553, partial [Selaginella moellendorffii].	PHYSPtr_m240lflr_YEPO_scaffold-YEPO-2005404-cf._Physcomicromitrium_sp._12_rc	F24J1.31; myb family transcription factor (MYB105)	F24J1.31; myb family transcription factor (MYB105)	GO:0003677, GO:0003700, GO:0005634, GO:0045449	14.1162	17.0611	12.7217	6.72107	9.61567	11.8073	17.1926	16.4781	18.6727	17.8283	15.0153	13.2078	10.5067	10.2209	11.7557	9.63107	7.96421	10.662
Pp3c1_16510V3.1	Pp3c1_16510V1.1	Pp1s63_95V6.1		Pp1s63_95V2.1	Phypa_15980	Phpat.001G064300	0010206:0006508:0016556	4252	9543	photosystem II repair:proteolysis:mRNA modification	serine-type endopeptidase activity	chloroplast thylakoid lumen					gi|514755130|ref|XP_004963206.1|	PREDICTED: protease Do-like 5, chloroplastic [Setaria italica].	PHYSPtr_m240lflr_YEPO_scaffold-YEPO-2010979-cf._Physcomicromitrium_sp._2	protease do-like 5:F28J12.30; protease HhoA, chloroplast (SPPA) (HHOA) [EC:3.4.21.-]	protease do-like 5:F28J12.30; protease HhoA, chloroplast (SPPA) (HHOA) [EC:3.4.21.-]	GO:0004252, GO:0006508, GO:0009536, GO:0016491	16.7896	16.646	15.5392	20.0496	17.3125	18.5237	15.5839	15.418	14.5457	13.1953	12.8025	16.1437	15.6861	12.5791	12.6524	15.465	12.9539	13.9955
Pp3c1_16600V3.1	Pp3c1_16600V1.1	Pp1s63_91V6.1		Pp1s63_91V2.1	Phypa_210551	Phpat.001G064400	0009958:0008152	0008092:0003824	0000139:0005856:0005789	positive gravitropism:metabolic process	cytoskeletal protein binding:catalytic activity	Golgi membrane:cytoskeleton:endoplasmic reticulum membrane					gi|674248489|gb|KFK41254.1|	hypothetical protein AALP_AA2G105300 [Arabis alpina].	PHYSPtr_onekp_YEPO_7705	altered response to gravity	altered response to gravity	GO:0005739, GO:0006457, GO:0031072, GO:0051082	19.2063	18.0397	19.6649	14.5392	15.8409	17.5696	20.7005	19.3807	22.6436	21.8034	21.7371	20.2559	23.3289	24.3341	23.5417	21.8364	19.8223	22.1201
Pp3c1_16650V3.1	Pp3c1_16650V1.1
Pp3c1_16690V3.1	Pp3c1_16690V1.1	Pp1s63_81V6.1		Pp1s63_81V2.1	Phypa_210548	Phpat.001G064500	0006355:0050832		0043078:0016592	regulation of transcription, DNA-templated:defense response to fungus		polar nucleus:mediator complex					gi|697154348|ref|XP_009631412.1|	PREDICTED: mediator of RNA polymerase II transcription subunit 21 isoform X1 [Nicotiana tomentosiformis].	PHYSPtr_m240lflr_YEPO_scaffold-YEPO-2080280-cf._Physcomicromitrium_sp._4_rc				5.7637	6.02924	7.15573	6.26076	6.63293	6.49662	7.05683	6.94182	7.04025	7.05896	7.03423	6.7835	8.99649	9.9755	9.11785	8.90177	8.85323	7.66912
Pp3c1_16700V3.1	Pp3c1_16700V1.1	Pp1s63_80V6.1		Pp1s63_78V2.1:Pp1s63_80V2.1	Phypa_77161:Phypa_127150		6355	0003700:0003677	5634	regulation of transcription, DNA-templated	sequence-specific DNA binding transcription factor activity:DNA binding	nucleus					gi|731378992|ref|XP_010660370.1|	PREDICTED: B3 domain-containing protein Os03g0120900-like [Vitis vinifera].	PHYSPtr_m240lflr_YEPO_scaffold-YEPO-2082425-cf._Physcomicromitrium_sp._7_rc	ap2 domain-containing transcription factor	ap2 domain-containing transcription factor	GO:0003700, GO:0005634, GO:0005654, GO:0006355	21.3486	16.2521	15.2592	9.08786	12.51	14.5813	9.26806	10.6365	8.13	10.1456	7.97841	6.77945	11.9937	10.8077	10.7996	9.74125	10.4615	8.6764
Pp3c1_16780V3.1	Pp3c1_16780V1.1	Pp1s63_71V6.1		Pp1s63_71V2.1	Phypa_183147	Phpat.001G064800	0010155:0031348:0010218:0009595:0009867:0009697:0009862:0010363:0010114:0010310:0010207:0010200:0043900:0006612:0050832:0042742:0009744:0009773:0000165:0009637:0009644:0009409:0019344:0009657:0006364	0005509:0008266	0009941:0048046:0009570:0009654:0009543:0009535:0019898	regulation of proton transport:negative regulation of defense response:response to far red light:detection of biotic stimulus:jasmonic acid mediated signaling pathway:salicylic acid biosynthetic process:systemic acquired resistance, salicylic acid mediated signaling pathway:regulation of plant-type hypersensitive response:response to red light:regulation of hydrogen peroxide metabolic process:pho…	calcium ion binding:poly(U) RNA binding	chloroplast envelope:apoplast:chloroplast stroma:photosystem II oxygen evolving complex:chloroplast thylakoid lumen:chloroplast thylakoid membrane:extrinsic component of membrane					gi|565491882|ref|XP_006303580.1|	hypothetical protein CARUB_v10011102mg [Capsella rubella].	PHYSPtr_onekp_YEPO_17272	oxygen-evolving enhancer protein chloroplast	oxygen-evolving enhancer protein chloroplast	GO:0005509, GO:0008266, GO:0009536, GO:0009543, GO:0009570, GO:0009579, GO:0009654, GO:0009941, GO:0016020, GO:0016491, GO:0019684, GO:0019898, GO:0030095, GO:0042742, GO:0048046	93.8634	64.6774	67.408	69.9763	85.9583	103.957	62.9565	58.3182	28.0287	69.4039	58.6836	81.0068	92.1924	79.8786	89.0953	153.685	139.633	139.173		1.04835
Pp3c1_16800V3.1	Pp3c1_16800V1.1	Pp1s63_67V6.1		Pp1s63_67V2.1	Phypa_77157		6629	16788		lipid metabolic process	hydrolase activity, acting on ester bonds		ARATHwo_AT5G03600.1	SGNH hydrolase-type esterase superfamily protein; FUNCTIONS IN: hydrolase activity, acting on ester bonds, carboxylesterase activity; INVOLVED IN: lipid metabolic process; EXPRESSED IN: petal, leaf whorl, sepal, flower; EXPRESSED DURING: 4 anthesis, petal differentiation and expansion stage; CONTAINS InterPro DOMAIN/s: Lipase, GDSL (InterPro:IPR001087), Esterase, SGNH hydrolase-type (InterPro:IPR…	sp|Q9LZS8|GDL70_ARATH	GDSL esterase/lipase At5g03600	gi|255575625|ref|XP_002528712.1|	carboxylic ester hydrolase, putative [Ricinus communis].	AULHEtr_onekp_WNGH_84502	carboxylic ester	carboxylic ester	GO:0006629	0.10909			1.11053		0.12946			0.0773817	0.0700484	0.230911	0.11709
Pp3c1_16810V3.1	Pp3c1_16810V1.1	Pp1s63_65V6.1		Pp1s63_65V2.1	Phypa_127176		0006486:0006468	0005524:0004674		protein glycosylation:protein phosphorylation	ATP binding:protein serine/threonine kinase activity						gi|242058317|ref|XP_002458304.1|	hypothetical protein SORBIDRAFT_03g030890 [Sorghum bicolor].	AULHEtr_onekp_WNGH_90802	atp binding protein	atp binding protein	GO:0004674, GO:0004713, GO:0005524, GO:0006468	13.0457	13.9276	14.2103	11.7418	12.4071	14.4838	11.5795	8.60392	12.6494	11.0764	10.5262	11.5807	13.5217	13.52	12.9125	12.0469	11.7205	11.803
Pp3c1_16820V3.1	Pp3c1_16820V1.1	Pp1s63_63V6.1		Pp1s63_63V2.1	Phypa_127103	Phpat.001G065200											gi|678308085|emb|CDW90591.1|	oxysterol-binding protein [Stylonychia lemnae].	FUNHY15tr_m240lflr_TR22841_c1_g1_i5_1	oxysterol binding 3	oxysterol binding 3	GO:0005515, GO:0008202	10.4497	9.75342	11.9758	7.70598	9.38104	8.59319	11.0461	11.0172	11.0841	10.5192	9.98557	9.76973	10.095	10.4566	11.8364	10.6177	8.97566	9.81976
Pp3c1_16840V3.1	Pp3c1_16840V1.1	Pp1s63_62V6.1		Pp1s63_62V2.1	Phypa_163976	Phpat.001G065300			5783			endoplasmic reticulum					gi|727476050|ref|XP_010413834.1|	PREDICTED: short-chain dehydrogenase/reductase family 42E member 1-like [Camelina sativa].	PHYSPtr_onekp_YEPO_74567			GO:0009536, GO:0016020	12.6749	12.5805	10.0539	9.59981	10.5635	14.6046	6.52756	10.5307	6.31312	5.55719	5.54334	6.88453	7.69087	5.51089	6.51541	5.72622	9.8879	6.3609
Pp3c1_16850V3.1	Pp3c1_16850V1.1	Pp1s63_61V6.1				Phpat.001G065400	9058	0030170:0008483:0016829	9507	biosynthetic process	pyridoxal phosphate binding:transaminase activity:lyase activity	chloroplast			sp|Q2RP86|HIS8_RHORT	Histidinol-phosphate aminotransferase	gi|242044896|ref|XP_002460319.1|	hypothetical protein SORBIDRAFT_02g026430 [Sorghum bicolor].	PHYSPtr_m240lflr_YEPO_scaffold-YEPO-2080173-cf._Physcomicromitrium_sp._5_rc				27.4751	30.9302	43.4225	31.5797	38.5672	33.0532	26.2443	19.0582	27.1241	23.9998	20.2096	30.3771	35.855	34.8578	41.186	29.7167	37.9087	28.3627
Pp3c1_16870V3.1	Pp3c1_16870V1.1																		PLAAStr_m240lflr_NWQC_scaffold-NWQC-2152134-Plagiochila_asplenioides_3_rc				3.53961	4.73437	4.03923	2.7254	2.96641	3.59567	3.65021	3.14922	5.70448	5.16388	4.51534	4.07272	4.55229	4.19402	4.9395	4.59928	4.87902	4.58413
Pp3c1_16900V3.1	Pp3c1_16900V1.1	Pp1s63_54V6.1		Pp1s63_54V2.1	Phypa_183136	Phpat.001G065600		5524			ATP binding						gi|697101926|ref|XP_009598374.1|	PREDICTED: ATP-citrate synthase alpha chain protein 2 [Nicotiana tomentosiformis].	PICABHC_MA_10431598g0010.1	at1g09430 f19j9_9	at1g09430 f19j9_9	GO:0003878, GO:0004775, GO:0005524, GO:0006085, GO:0009346, GO:0016829	25.2093	25.3198	28.9049	16.6086	17.1744	16.4885	12.6865	19.9385	18.193	17.6179	14.0364	13.689	16.5483	21.7062	17.9576	19.4511	12.6805	13.5975
Pp3c1_16910V3.1	Pp3c1_16910V1.1	Pp1s63_52V6.1		Pp1s63_52V2.1	Phypa_127152	Phpat.001G065700	0009094:0009793	0004069:0080130:0033853:0033854:0030170	9570	L-phenylalanine biosynthetic process:embryo development ending in seed dormancy	L-aspartate:2-oxoglutarate aminotransferase activity:L-phenylalanine:2-oxoglutarate aminotransferase activity:aspartate-prephenate aminotransferase activity:glutamate-prephenate aminotransferase activity:pyridoxal phosphate binding	chloroplast stroma			sp|Q8GYY0|1A112_ARATH	Probable aminotransferase ACS12	gi|848890050|ref|XP_012845171.1|	PREDICTED: bifunctional aspartate aminotransferase and glutamate/aspartate-prephenate aminotransferase-like [Erythranthe guttata].	PHYSPtr_m240lflr_YEPO_scaffold-YEPO-2081338-cf._Physcomicromitrium_sp._2	aspartate aminotransferase	aspartate aminotransferase	GO:0004069, GO:0009507, GO:0009536, GO:0009793, GO:0016847, GO:0030170	32.3757	33.0981	32.1509	31.3121	28.177	30.6081	24.4956	27.8528	29.1344	28.7033	24.783	25.6358	29.1175	31.6487	31.3106	32.0606	29.5276	30.4161
Pp3c1_16920V3.1	Pp3c1_16920V1.1	Pp1s63_51V6.1		Pp1s63_51V2.1	Phypa_163971	Phpat.001G065800	0010413:0016926:0010228:0045492:0050665	0003676:0046872:0004565	48046	glucuronoxylan metabolic process:protein desumoylation:vegetative to reproductive phase transition of meristem:xylan biosynthetic process:hydrogen peroxide biosynthetic process	nucleic acid binding:metal ion binding:beta-galactosidase activity	apoplast					gi|645244099|ref|XP_008228284.1|	PREDICTED: zinc finger protein NUTCRACKER [Prunus mume].	CERPUR40tr_m240lflr_isotig05649_6	nucleic acid binding	nucleic acid binding	GO:0003700, GO:0005622, GO:0008270, GO:0009536, GO:0031177, GO:0045449	12.2568	11.3393	11.6468	9.76234	11.5055	13.4606	8.24873	7.06374	8.71978	8.86659	7.24765	8.5079	12.1424	11.2251	10.7186	8.34741	11.4239	10.4442
Pp3c1_16980V3.1	Pp3c1_16980V1.1	Pp1s63_47V6.1		Pp1s63_47V2.1	Phypa_77144	Phpat.001G065900													PHYSPtr_onekp_YEPO_5991	T8H10.40; hypothetical protein [Arabidopsis thaliana]			11.8533	11.5654	10.6737	9.08022	6.90777	11.2656	8.76135	8.4587	9.89893	9.64672	11.4874	8.12726	15.3251	17.196	17.6125	15.09	9.05033	16.8402
Pp3c1_17080V3.1	Pp3c1_17080V1.1	Pp1s63_43V6.1		Pp1s63_43V2.1	Phypa_163970	Phpat.001G066000													PHYSPtr_onekp_YEPO_18668				18.1486	12.8922	15.1934	21.6956	18.4535	20.8604	15.2593	17.3364	10.496	14.149	12.4528	17.5277	19.6618	9.53372	14.0785	12.42	30.4925	18.7813
Pp3c1_170V3.1	Pp3c1_170V1.1	Pp1s283_24V6.1;Pp1s283_25V6.1		Pp1s283_25V2.1	Phypa_148779	Phpat.001G001200											gi|148909624|gb|ABR17903.1|	unknown [Picea sitchensis].	PHYSPtr_m240lflr_YEPO_scaffold-YEPO-2004349-cf._Physcomicromitrium_sp._2_rc	TEL3S.1; zinc finger (C3HC4-type RING finger) family protein	TEL3S.1; zinc finger (C3HC4-type RING finger) family protein	GO:0005515, GO:0008270, GO:0031177	18.3394	15.164	19.7585	17.7375	21.2636	18.6465	19.8154	23.4216	19.5304	16.8987	19.9071	18.6922	15.8995	17.1196	14.8004	16.1613	16.7974	17.8979
Pp3c1_1710V3.1	Pp3c1_1710V1.1
Pp3c1_1720V3.1	Pp3c1_1720V1.1	Pp1s200_33V6.1																				GO:0005783, GO:0016020															0.26262
Pp3c1_17220V3.1	Pp3c1_17220V1.1	Pp1s63_27V6.1		Pp1s63_27V2.1	Phypa_11555	Phpat.001G066100	8152	0016887:0005524	16020	metabolic process	ATPase activity:ATP binding	membrane					gi|658043224|ref|XP_008357247.1|	PREDICTED: ABC transporter G family member 23-like [Malus domestica].	PLAAStr_onekp_NWQC_158633	white-brown-complex abc transporter family	white-brown-complex abc transporter family	GO:0005524, GO:0016020, GO:0016887	4.66914	2.86893	2.23641	2.66328	2.19734	3.6243	1.53309	2.15069	1.104	1.97989	1.42964	2.34817	3.2109	2.46335	2.83919	2.85783	2.30361	4.53783
Pp3c1_17230V3.1	Pp3c1_17230V1.1	Pp1s63_25V6.1		Pp1s63_25V2.1	Phypa_77133																			0.397237		0.1825		0.117012										0.397064
Pp3c1_17350V3.1	Pp3c1_17350V1.1																																	0.448633
Pp3c1_17360V3.1	Pp3c1_17360V1.1	Pp1s63_16V6.1				Phpat.001G066200	0044763:0010016:0048513:0006468:0050794:0006952	0004674:0005524	16023	single-organism cellular process:shoot system morphogenesis:organ development:protein phosphorylation:regulation of cellular process:defense response	protein serine/threonine kinase activity:ATP binding	cytoplasmic membrane-bounded vesicle	ARATHwo_AT5G01890.1	Leucine-rich receptor-like protein kinase family protein; FUNCTIONS IN: protein serine/threonine kinase activity, kinase activity, ATP binding; INVOLVED IN: transmembrane receptor protein tyrosine kinase signaling pathway, protein amino acid phosphorylation; LOCATED IN: plasma membrane; EXPRESSED IN: 22 plant structures; EXPRESSED DURING: 13 growth stages; CONTAINS InterPro DOMAIN/s: Protein kina…	sp|Q9LYN8|EMS1_ARATH	Leucine-rich repeat receptor protein kinase EMS1	gi|302786756|ref|XP_002975149.1|	hypothetical protein SELMODRAFT_102522, partial [Selaginella moellendorffii].	FUNHY15tr_m240lflr_TR45462_c0_g2_i4_8_rc				37.7966	51.6184	48.629	32.4979	39.4329	49.5768	58.3914	32.451	53.9045	59.9046	53.0188	51.5593	57.531	66.8796	65.947	64.0899	46.7303	53.0523
Pp3c1_17370V3.1	Pp3c1_17370V1.1	Pp1s63_14V6.1;Pp1s63_15V6.1;Pp1s63_16V6.1		Pp1s63_15V2.1	Phypa_127110	Phpat.001G066300	7275			multicellular organismal development							gi|302774018|ref|XP_002970426.1|	hypothetical protein SELMODRAFT_231529 [Selaginella moellendorffii].	PHYSPtr_m240lflr_YEPO_scaffold-YEPO-2019633-cf._Physcomicromitrium_sp._1	protein binding	protein binding	GO:0004871, GO:0009416, GO:0009536	16.7698	20.117	14.3413	15.6811	15.8514	17.6738	21.876	22.5548	23.9642	22.6909	22.0259	24.0337	19.0079	17.6895	18.7337	18.9013	19.3092	20.6631
Pp3c1_1740V3.1	Pp3c1_1740V1.1	Pp1s200_31V6.1;Pp1s200_32V6.1		Pp1s200_31V2.1	Phypa_90693	Phpat.001G007000													PHYSPtr_onekp_YEPO_74703				0.558487	0.245454	0.184125	0.169151	0.151963	0.168705	1.16496	0.729911	1.0228	0.638981	0.859742	0.621239	0.288076	0.665468	0.549235	0.32713	0.32716	0.510589
Pp3c1_17410V3.1	Pp3c1_17410V1.1																		PHYSPtr_m240lflr_YEPO_scaffold-YEPO-2014489-cf._Physcomicromitrium_sp._3_rc				0.170908	0.0860679
Pp3c1_17430V3.1	Pp3c1_17430V1.1	Pp1s63_11V6.1		Pp1s63_11V2.1	Phypa_77123														PHYSPtr_onekp_YEPO_15721			GO:0016020	2.35435	5.05869	2.40332	1.16204		2.6077	83.3584	62.0883	32.3613	29.5633	28.867	29.8186	32.5304	44.025	33.4632	43.8931	19.9347	51.0751			3.48626				4.17924
Pp3c1_17450V3.1	Pp3c1_17450V1.1	Pp1s63_8V6.1;Pp1s63_9V6.1		Pp1s63_8V2.1	Phypa_127094	Phpat.001G066400	0045454:0055114	0005488:0009055:0015035		cell redox homeostasis:oxidation-reduction process	binding:electron carrier activity:protein disulfide oxidoreductase activity						gi|702446265|ref|XP_010024634.1|	PREDICTED: monothiol glutaredoxin-S10-like [Eucalyptus grandis].	FUNHY15tr_m240lflr_TR48784_c0_g1_i1_3_rc	glutaredoxin	glutaredoxin	GO:0009055, GO:0015035, GO:0045454	0.0746686	0.244416	0.383617	0.138204	0.1164	0.354445	0.0962522	0.405081	0.264826	0.16781	0.210734	0.260469	0.286858	0.220205	0.454359	0.501149	0.313792	0.343405
Pp3c1_17463V3.1		Pp1s63_7V6.1																	DICSCtr_onekp_NGTD_3382											0.148587				0.117591		0.287194
Pp3c1_17470V3.1	Pp3c1_17470V1.1																																		0.248393	0.275424		0.141034
Pp3c1_1761V3.1		Pp1s200_29V6.1																					0.0831745	0.083772	0.033515	0.128289			0.0357389	0.0376022	0.235995		0.273863	0.0595159	0.0655457	0.145357	0.0749803	0.223295	0.15535	0.0340022
Pp3c1_17710V3.1	Pp3c1_17710V1.1	Pp1s63_3V6.1		Pp1s63_3V2.1	Phypa_163967	Phpat.001G066500													PHYSPtr_onekp_YEPO_78382			GO:0016020	10.3747	10.5683	11.5409	8.06941	11.0585	8.13779	8.99193	15.8347	13.628	15.2973	15.1405	14.657	9.39866	10.9638	10.9114	11.6647	12.4628	13.0499
Pp3c1_17721V3.1																			XENTR_311435				0.205638				0.0854847							0.0735727	0.0810267	0.179688
Pp3c1_17760V3.1	Pp3c1_17760V1.1	Pp1s43_253V6.1;Pp1s43_255V6.1				Phpat.001G066700		0046872:0003723:0000166			metal ion binding:RNA binding:nucleotide binding						gi|702465240|ref|XP_010029137.1|	PREDICTED: zinc finger CCCH domain-containing protein 41 [Eucalyptus grandis].	PHYSPtr_onekp_YEPO_15808				14.0351	15.6068	13.2864	11.6109	12.1814	13.2909	14.3148	16.2958	14.772	14.3464	13.0073	12.7131	13.2949	13.9089	13.5415	14.3589	12.4208	14.5961
Pp3c1_17860V3.1	Pp3c1_17860V1.1	Pp1s646_1V6.1		Pp1s646_1V2.1	Phypa_228400	Phpat.001G066900	6629	16788		lipid metabolic process	hydrolase activity, acting on ester bonds						gi|573948709|ref|XP_006656658.1|	PREDICTED: GDSL esterase/lipase At5g45910-like [Oryza brachyantha].	PHYSPtr_onekp_YEPO_4088	F25P12.90; GDSL-motif lipase/hydrolase family protein	F25P12.90; GDSL-motif lipase/hydrolase family protein	GO:0006629, GO:0016020	1.01641	1.27017	1.22869	0.505157	0.37558	0.737126	4.73134	5.94808	2.7504	4.30268	4.72785	4.92948	2.02472	1.65295	2.21434	3.36037	2.63669	5.03236
Pp3c1_17870V3.1	Pp3c1_17870V1.1	Pp1s570_2V6.1		Pp1s570_2V2.1	Phypa_23950	Phpat.001G067000	6629	16788		lipid metabolic process	hydrolase activity, acting on ester bonds						gi|593266026|ref|XP_007135191.1|	hypothetical protein PHAVU_010G108700g [Phaseolus vulgaris].	PHYSPtr_onekp_YEPO_4088	F14J9.5; GDSL-motif lipase/hydrolase family protein	F14J9.5; GDSL-motif lipase/hydrolase family protein	GO:0006629, GO:0016020	49.9937	45.7413	50.5991	23.5627	21.1234	38.9529	143.944	127.595	117.096	110.489	127.889	95.9303	43.5909	54.1128	56.6632	63.7235	44.5068	80.094				-1.33304		1.99932	1.40935
Pp3c1_17880V3.1	Pp3c1_17880V1.1	Pp1s570_1V6.1		Pp1s570_1V2.1	Phypa_228361	Phpat.001G067100	0006486:0006888:0006886	8270	0030127:0005783:0005794	protein glycosylation:ER to Golgi vesicle-mediated transport:intracellular protein transport	zinc ion binding	COPII vesicle coat:endoplasmic reticulum:Golgi apparatus	ARATHwo_AT3G07100.1	Encodes SEC24a/ERMO2. Required for endoplasmic reticulum (ER) morphology.	sp|Q9SFU0|SC24A_ARATH	Protein transport protein Sec24-like At3g07100	gi|590605860|ref|XP_007020598.1|	Sec23/Sec24 protein transport family protein isoform 1 [Theobroma cacao].	PHYSPtr_m240lflr_YEPO_scaffold-YEPO-2002573-cf._Physcomicromitrium_sp._11_rc	F17A9.18; protein transport protein Sec24, putative [Arabidopsis thaliana]	F17A9.18; protein transport protein Sec24, putative [Arabidopsis thaliana]	GO:0005515, GO:0005737, GO:0006886, GO:0006888, GO:0008270, GO:0009536, GO:0016020, GO:0030127	20.2681	21.2642	22.3168	22.3921	18.2716	21.6054	19.5064	18.4857	26.1486	25.8144	23.1966	19.8677	22.194	23.9785	22.5337	23.6079	21.9817	20.4132
Pp3c1_17909V3.1		Pp1s43_3V6.1											ARATHwo_AT1G35710.1	Protein kinase family protein with leucine-rich repeat domain; FUNCTIONS IN: protein serine/threonine kinase activity, protein tyrosine kinase activity, protein kinase activity, ATP binding; INVOLVED IN: transmembrane receptor protein tyrosine kinase signaling pathway, protein amino acid phosphorylation; LOCATED IN: endomembrane system; EXPRESSED IN: 22 plant structures; EXPRESSED DURING: 13 grow…	sp|Q9LP24|Y1571_ARATH	Probable leucine-rich repeat receptor-like protein kinase At1g35710	gi|727547580|ref|XP_010446819.1|	PREDICTED: protein SUPPRESSOR OF npr1-1, CONSTITUTIVE 1-like isoform X2 [Camelina sativa].	PINTA_000046704					0.0111551	0.0401659	0.0102498				0.0300427		0.0284471					0.0149766			0.0135832
Pp3c1_1790V3.1	Pp3c1_1790V1.1	Pp1s200_26V6.1;Pp1s200_27V6.1				Phpat.001G007300							ARATHwo_AT3G18950.1	Transducin/WD40 repeat-like superfamily protein; CONTAINS InterPro DOMAIN/s: WD40 repeat 2 (InterPro:IPR019782), WD40 repeat-like-containing domain (InterPro:IPR011046), WD40-repeat-containing domain (InterPro:IPR017986), WD40/YVTN repeat-like-containing domain (InterPro:IPR015943), WD40 repeat (InterPro:IPR001680), WD40 repeat, subgroup (InterPro:IPR019781), G-protein beta WD-40 repeat, region (…	sp|C4Q0P6|LIS1_SCHMA	Lissencephaly-1 homolog	gi|147778385|emb|CAN67368.1|	hypothetical protein VITISV_021843 [Vitis vinifera].	PHYSPtr_m240lflr_YEPO_scaffold-YEPO-2081834-cf._Physcomicromitrium_sp._8_rc				7.4553	10.8791	8.73724	10.9871	6.17614	11.6112	14.4068	11.1279	21.3811	20.094	17.5655	18.4032	22.372	21.4206	17.1037	20.1586	14.2872	18.5164			1.16942
Pp3c1_17930V3.1	Pp3c1_17930V1.1	Pp1s43_5V6.1;Pp1s43_6V6.1											ARATHwo_AT1G27180.1	disease resistance protein (TIR-NBS-LRR class), putative; FUNCTIONS IN: transmembrane receptor activity, ATP binding; INVOLVED IN: signal transduction, apoptosis, defense response, innate immune response; LOCATED IN: intrinsic to membrane; CONTAINS InterPro DOMAIN/s: NB-ARC (InterPro:IPR002182), Leucine-rich repeat, typical subtype (InterPro:IPR003591), Disease resistance protein (InterPro:IPR000…	sp|O23530|SNC1_ARATH	Protein SUPPRESSOR OF npr1-1, CONSTITUTIVE 1	gi|12597786|gb|AAG60098.1|AC073178_9	disease resistance protein, putative [Arabidopsis thaliana].	PINTA_000078851	tir-nbs-lrr resistance protein	tir-nbs-lrr resistance protein	GO:0004674, GO:0005515, GO:0005524, GO:0006468, GO:0006915, GO:0006952			0.0446545			0.0146125	0.0634901		0.0174685	0.0474391						0.0826422		0.0302024
Pp3c1_17950V3.1	Pp3c1_17950V1.1	Pp1s43_6V6.1																	PHYSPtr_m240lflr_YEPO_scaffold-YEPO-2016093-cf._Physcomicromitrium_sp._1				0.381816	0.769118	1.18686	0.555265	0.272096	0.194191	0.562495	0.961709	1.00596	0.910629	0.846673	0.761086	0.838195	1.0009	1.84393	0.58574	0.687671	0.802741
Pp3c1_17970V3.1	Pp3c1_17970V1.1		Pp1s43_7V6.1																														0.347847
Pp3c1_17990V3.1	Pp3c1_17990V1.1	Pp1s43_8V6.1		Pp1s43_8V2.1	Phypa_180517	Phpat.001G067500	0055114:0006979	0020037:0046872:0051920:0004601	5576	oxidation-reduction process:response to oxidative stress	heme binding:metal ion binding:peroxiredoxin activity:peroxidase activity	extracellular region					gi|18654477|gb|AAL35363.2|AF442385_1	thioredoxin peroxidase [Capsicum annuum].	PHYSPtr_onekp_YEPO_628	thioredoxin-dependent peroxidase	thioredoxin-dependent peroxidase	GO:0005829, GO:0006979, GO:0020037, GO:0045454, GO:0051920, GO:0055114	10.3029	7.05557	8.98627	8.25891	6.52902	8.91028	18.1804	17.2584	19.982	15.5761	18.1669	17.0376	23.0804	22.7593	22.1196	20.7324	11.9793	16.7943			1.36695
Pp3c1_1800V3.1	Pp3c1_1800V1.1	Pp1s200_25V6.1		Pp1s200_25V2.1	Phypa_193560	Phpat.001G007400	6412	3735	5840	translation	structural constituent of ribosome	ribosome					gi|719965717|ref|XP_010257345.1|	na	PHYSPtr_m240lflr_YEPO_scaffold-YEPO-2009846-cf._Physcomicromitrium_sp._1	60s ribosomal protein l34	60s ribosomal protein l34	GO:0003735, GO:0005739, GO:0005829, GO:0005840, GO:0006412	102.989	90.4273	105.461	75.9559	92.6405	89.0941	76.0466	69.1622	62.1195	57.3027	60.7899	80.2232	120.362	104.846	128.053	87.1304	111.645	104.183
Pp3c1_18010V3.1	Pp3c1_18010V1.1	Pp1s43_12V6.1		Pp1s43_12V2.1	Phypa_162425	Phpat.001G067600	0009813:0009744:0009704:0010224	16787	0005634:0005829	flavonoid biosynthetic process:response to sucrose:de-etiolation:response to UV-B	hydrolase activity	nucleus:cytosol					gi|657949011|ref|XP_008340833.1|	PREDICTED: probable esterase KAI2 [Malus domestica].	LEUALtr_onekp_VMXJ_14931	sigma factor sigb regulation protein	sigma factor sigb regulation protein	GO:0004091, GO:0009536	6.45874	3.62786	4.92481	20.4375	0.526659	10.4359	9.15826	5.96337	5.9206	8.80492	7.32635	10.0786	9.39658	2.89782	3.62782	6.66904	1.9487	7.67737
Pp3c1_18030V3.1	Pp3c1_18030V1.1						0071704:0044238:0044763:0044710:0044767:0044237	16491	44434	organic substance metabolic process:primary metabolic process:single-organism cellular process:single-organism metabolic process:single-organism developmental process:cellular metabolic process	oxidoreductase activity	chloroplast part							STESUtr_onekp_LNSF_1315
Pp3c1_18050V3.1	Pp3c1_18050V1.1	Pp1s43_13V6.1		Pp1s43_13V2.1	Phypa_18928	Phpat.001G067700											gi|225440980|ref|XP_002283418.1|	PREDICTED: probable ribosome biogenesis protein RLP24 [Vitis vinifera].	PHIFOtr_onekp_ORKS_430	T13E15.13; 60S ribosomal protein L24, putative [KO:K02896] [Arabidopsis thaliana]	T13E15.13; 60S ribosomal protein L24, putative [KO:K02896] [Arabidopsis thaliana]	GO:0003735, GO:0005840, GO:0006412	25.4993	32.0792	34.5298	27.8383	29.1603	29.5857	17.7181	20.6988	22.3685	22.4399	18.1475	20.7219	25.548	23.5239	24.9099	22.819	21.3346	22.3211
Pp3c1_18060V3.1	Pp3c1_18060V1.1
Pp3c1_18061V3.1
Pp3c1_18090V3.1	Pp3c1_18090V1.1	Pp1s43_17V6.1;Pp1s43_18V6.1		Pp1s43_18V2.1	Phypa_207959	Phpat.001G067900	0023014:0000160:0006468	0000155:0005524:0004674	16020	signal transduction by phosphorylation:phosphorelay signal transduction system:protein phosphorylation	phosphorelay sensor kinase activity:ATP binding:protein serine/threonine kinase activity	membrane			sp|Q9XH57|ETR2_PELHO	Ethylene receptor 2	gi|916867258|ref|WP_051474314.1|	hypothetical protein [Rhodospirillales bacterium URHD0088].	FUNHY15tr_m240lflr_TR9478_c0_g1_i7_4	multi-sensor hybrid histidine kinase	multi-sensor hybrid histidine kinase	GO:0000155, GO:0000156, GO:0000160, GO:0005524, GO:0016020, GO:0018106	12.9044	14.375	11.7197	10.3067	11.2145	11.1191	11.668	11.4037	15.8312	14.6728	13.8165	12.0013	12.8501	15.7702	13.7697	13.6888	11.0428	13.3048
Pp3c1_18100V3.1	Pp3c1_18100V1.1	Pp1s43_17V6.1																	SCOAQtr_onekp_BPSG_15710					0.372409	0.0744958	0.399218	0.461124	0.0731327	0.238317	0.167161	0.262279	0.395706	0.347847	0.198434	0.364231	0.807733	0.0833314	0.248165	0.431631	0.453471
Pp3c1_1810V3.1	Pp3c1_1810V1.1	Pp1s200_23V6.1		Pp1s200_23V2.1	Phypa_193556	Phpat.001G007500	5978	0043169:0003844:0004553	9536	glycogen biosynthetic process	cation binding:1,4-alpha-glucan branching enzyme activity:hydrolase activity, hydrolyzing O-glycosyl compounds	plastid					gi|747099592|ref|XP_011097853.1|	PREDICTED: 1,4-alpha-glucan-branching enzyme 3, chloroplastic/amyloplastic [Sesamum indicum].	CERPUGG1tr_m240lflr_isotig14486_2	starch branching enzyme ii	starch branching enzyme ii	GO:0003844, GO:0004553, GO:0009536, GO:0009570, GO:0010021, GO:0043169	3.2286	4.83093	5.74832	4.41979	6.00748	5.52073	3.49702	2.08449	4.68275	4.57015	3.72629	4.24036	4.62119	5.00239	4.99345	5.06768	3.30892	4.49092
Pp3c1_18110V3.1	Pp3c1_18110V1.1	Pp1s43_19V6.1		Pp1s43_19V2.1	Phypa_123075	Phpat.001G068000	5975	0030246:0004553		carbohydrate metabolic process	carbohydrate binding:hydrolase activity, hydrolyzing O-glycosyl compounds						gi|148906012|gb|ABR16166.1|	unknown [Picea sitchensis].	AULHEtr_onekp_WNGH_14304	F24J5.20; alpha-xylosidase (XYL1)	F24J5.20; alpha-xylosidase (XYL1)	GO:0005975, GO:0016023, GO:0016798	11.8357	8.83412	13.4133	9.59503	12.7836	10.0606	7.20466	7.35733	6.5798	4.01105	5.23586	7.71293	8.16126	4.83248	8.12928	5.04362	8.37209	7.22896
Pp3c1_18120V3.1	Pp3c1_18120V1.1
Pp3c1_18130V3.1	Pp3c1_18130V1.1	Pp1s43_21V6.1		Pp1s43_21V2.1	Phypa_14077	Phpat.001G068100	0006281:0044262:0044723:0008654:0008299	3913		DNA repair:cellular carbohydrate metabolic process:single-organism carbohydrate metabolic process:phospholipid biosynthetic process:isoprenoid biosynthetic process	DNA photolyase activity						gi|590719025|ref|XP_007050945.1|	Photolyase/blue-light receptor 2 isoform 2 [Theobroma cacao].	PHYSPtr_onekp_YEPO_18271	dna photolyase protein	dna photolyase protein	GO:0003913, GO:0006281	44.4787	42.2344	44.4544	52.643	49.0363	56.8521	42.8104	38.1375	41.1683	42.4538	36.0882	43.6057	48.2844	47.5554	50.2548	44.7389	56.0546	44.5178
Pp3c1_18139V3.1																							1.25785	1.71935	0.977496	1.16408	1.23254	1.06623	0.579088	2.1934	1.65702	1.26922	1.77499	1.73583	0.531028	1.41315	1.09343	1.20604	1.51031	1.65284
Pp3c1_18150V3.1	Pp3c1_18150V1.1	Pp1s43_22V6.1				Phpat.001G068200	0007018:0008152	0008017:0046872:0005524:0003777	0005871:0005874	microtubule-based movement:metabolic process	microtubule binding:metal ion binding:ATP binding:microtubule motor activity	kinesin complex:microtubule					gi|720049503|ref|XP_010271468.1|	PREDICTED: kinesin-like protein NACK2 [Nelumbo nucifera].	FUNHY15tr_m240lflr_TR4782_c0_g1_i1_9_rc	kinesin-like protein	kinesin-like protein	GO:0003777, GO:0005515, GO:0005524, GO:0007018	1.32483	2.10052	1.51886	0.862199	0.927373	1.25777	1.44336	1.27516	1.57636	1.49283	1.2785	1.25685	1.9904	2.85678	2.86635	2.16845	2.27491	2.36906
Pp3c1_18160V3.1																			BUXAPtr_onekp_HRWG_64988					0.87231				0.205562								1.13519
Pp3c1_18170V3.1	Pp3c1_18170V1.1																		DICSCtr_m240lflr_NGTD_scaffold-NGTD-2085407-Dicranum_scoparium_2										0.23382	0.24601								0.486965
Pp3c1_18190V3.1	Pp3c1_18190V1.1	Pp1s43_25V6.1		Pp1s43_25V2.1	Phypa_180532	Phpat.001G068300	55085		16021	transmembrane transport		integral component of membrane	ARATHwo_AT4G03115.1	Mitochondrial substrate carrier family protein; FUNCTIONS IN: binding; INVOLVED IN: transport, transmembrane transport; LOCATED IN: mitochondrial inner membrane, membrane; CONTAINS InterPro DOMAIN/s: Mitochondrial substrate carrier (InterPro:IPR001993), Mitochondrial substrate/solute carrier (InterPro:IPR018108); BEST Arabidopsis thaliana protein match is: plant uncoupling mitochondrial protein 1…	sp|O14281|YETC_SCHPO	Uncharacterized mitochondrial carrier C8C9.12c	gi|527210038|gb|EPS74614.1|	hypothetical protein M569_00141, partial [Genlisea aurea].	PHYSPtr_m240lflr_YEPO_scaffold-YEPO-2012496-cf._Physcomicromitrium_sp._2	mitochondrial carrier protein	mitochondrial carrier protein	GO:0005488, GO:0005743, GO:0006810, GO:0009987, GO:0016020	14.2656	17.3138	15.3508	13.2158	12.2265	12.8387	13.0224	10.5644	18.8198	14.2576	14.6978	13.8862	13.5645	17.0355	14.8712	15.2632	11.3086	11.9321
Pp3c1_18200V3.1	Pp3c1_18200V1.1	Pp1s43_27V6.1		Pp1s43_27V2.1	Phypa_162432	Phpat.001G068400	55085		16021	transmembrane transport		integral component of membrane	ARATHwo_AT1G34065.1	S-adenosylmethionine carrier 2 (SAMC2); FUNCTIONS IN: binding; INVOLVED IN: transport, mitochondrial transport, transmembrane transport; LOCATED IN: mitochondrial inner membrane, membrane; EXPRESSED IN: 22 plant structures; EXPRESSED DURING: 13 growth stages; CONTAINS InterPro DOMAIN/s: Mitochondrial carrier protein (InterPro:IPR002067), Mitochondrial substrate carrier (InterPro:IPR001993), Mitoc…	sp|Q55E45|MCFE_DICDI	Mitochondrial substrate carrier family protein E	gi|356557347|ref|XP_003546978.1|	PREDICTED: solute carrier family 25 member 44-like [Glycine max].	PHYSPtr_m240lflr_YEPO_scaffold-YEPO-2081965-cf._Physcomicromitrium_sp._8_rc	mitochondrial carrier protein	mitochondrial carrier protein	GO:0005488, GO:0005743, GO:0006839, GO:0016020	28.0741	41.1231	60.3909	36.6	58.6579	31.0439	45.5056	53.892	63.1324	85.789	80.2076	57.2679	41.9332	48.1947	41.233	56.4497	45.1148	44.7067
Pp3c1_1820V3.1	Pp3c1_1820V1.1	Pp1s200_22V6.1		Pp1s200_22V2.1	Phypa_143208	Phpat.001G007600	8152	0050662:0003824		metabolic process	coenzyme binding:catalytic activity						gi|9998901|emb|CAC07424.1|	cinnamoyl-CoA reductase [Populus trichocarpa].	PHYSPtr_onekp_YEPO_15560	cinnamoyl CoA reductase	cinnamoyl CoA reductase	GO:0003824, GO:0044237, GO:0050662	37.5381	60.5793	22.7703	92.4226	15.8288	76.7508	15.5275	20.0284	5.2375	9.41309	14.7924	23.9489	27.6176	8.01778	13.4825	11.6476	56.51	31.4958
Pp3c1_18210V3.1	Pp3c1_18210V1.1	Pp1s43_30V6.1;Pp1s43_31V6.1		Pp1s43_30V2.1	Phypa_73645	Phpat.001G068500																	0.268286	0.360284	0.144141	0.137936	0.371759	0.0353758	0.30741	0.0808592		0.0765645	0.0841303	0.255964	0.0352372	0.0390717	0.0403092	0.0400142		0.182795
Pp3c1_18250V3.1	Pp3c1_18250V1.1	Pp1s43_32V6.1		Pp1s43_32V2.1	Phypa_180534	Phpat.001G068600	0007010:0006094:0051567:0010498:0006342:0006526:0044205	0046872:0004088:0005524	0016020:0005951:0009570	cytoskeleton organization:gluconeogenesis:histone H3-K9 methylation:proteasomal protein catabolic process:chromatin silencing:arginine biosynthetic process:'de novo' UMP biosynthetic process	metal ion binding:carbamoyl-phosphate synthase (glutamine-hydrolyzing) activity:ATP binding	membrane:carbamoyl-phosphate synthase complex:chloroplast stroma			sp|O28994|CARB_ARCFU	Carbamoyl-phosphate synthase large chain	gi|565400490|ref|XP_006365761.1|	PREDICTED: carbamoyl-phosphate synthase large chain, chloroplastic-like, partial [Solanum tuberosum].	FUNHY15tr_m240lflr_TR10512_c0_g1_i1_4	carbamoyl-phosphate large glutamine-dependent	carbamoyl-phosphate large glutamine-dependent	GO:0000287, GO:0004087, GO:0004088, GO:0005524, GO:0006221, GO:0006526, GO:0009536, GO:0016020, GO:0030145	4.9978	7.61857	9.69508	8.24254	8.93862	7.41377	5.15832	4.7059	8.15616	7.32901	6.68323	7.02252	8.78183	9.00717	9.34951	7.58127	8.089	7.23722
Pp3c1_18259V3.1																									0.0584722			0.0574022						0.0519173					0.0677579	0.059322
Pp3c1_18260V3.1	Pp3c1_18260V1.1	Pp1s43_33V6.1		Pp1s43_33V2.1	Phypa_180536	Phpat.001G068700	6468	0004674:0005524	0009506:0005774:0005886	protein phosphorylation	protein serine/threonine kinase activity:ATP binding	plasmodesma:vacuolar membrane:plasma membrane	ARATHwo_AT5G67280.1	receptor-like kinase (RLK); FUNCTIONS IN: protein serine/threonine kinase activity, kinase activity, ATP binding; INVOLVED IN: transmembrane receptor protein tyrosine kinase signaling pathway, protein amino acid phosphorylation; LOCATED IN: endomembrane system; EXPRESSED IN: 22 plant structures; EXPRESSED DURING: 13 growth stages; CONTAINS InterPro DOMAIN/s: Protein kinase, catalytic domain (Inte…	sp|Q94C77|RPKL_ARATH	Receptor protein kinase-like protein At4g34220	gi|923687612|ref|XP_013655600.1|	PREDICTED: probable inactive receptor kinase At1g48480 [Brassica napus].	FUNHY15tr_m240lflr_TR30396_c0_g1_i1_1	nodulation receptor kinase	nodulation receptor kinase	GO:0004674, GO:0005515, GO:0005524, GO:0006468, GO:0016020	0.122007	0.0446848		0.0410585	0.0414972	0.0526504	0.257357	0.0902582	0.204558	0.0997083	0.187819	0.0476196	0.24911	0.145378	0.239971	0.0595539	0.108761	0.0544113
Pp3c1_18270V3.1	Pp3c1_18270V1.1	Pp1s43_34V6.1				Phpat.001G068800									sp|A8HUA1|CFA58_CHLRE	Cilia- and flagella-associated protein 58	gi|198420385|ref|XP_002129786.1|	PREDICTED: coiled-coil domain-containing protein 147 [Ciona intestinalis].	PHYSPtr_m240lflr_YEPO_scaffold-YEPO-2082119-cf._Physcomicromitrium_sp._2				2.23057	1.92345	1.66217	0.410026	0.114319	1.10597	21.3286	22.9379	8.36626	7.16138	9.85247	8.29749	6.26668	7.28904	7.82978	9.1055	4.87954	11.5607							3.17805
Pp3c1_18280V3.1	Pp3c1_18280V1.1	Pp1s43_35V6.1;Pp1s43_36V6.1		Pp1s43_35V2.1	Phypa_41108	Phpat.001G068900	6468	0005524:0004674		protein phosphorylation	ATP binding:protein serine/threonine kinase activity		ARATHwo_AT5G13160.1	Mutant is defective in perception of Pseudomonas syringae avirulence gene avrPphB. Encodes a putative serine-threonine kinase.	sp|Q9FE20|PBS1_ARATH	Serine/threonine-protein kinase PBS1	gi|802628049|ref|XP_012076935.1|	PREDICTED: receptor-like serine/threonine-protein kinase ALE2 isoform X3 [Jatropha curcas].	FUNHY15tr_m240lflr_TR32494_c0_g1_i1_4_rc	MPI10.6; protein kinase family [Arabidopsis thaliana]:atp binding	MPI10.6; protein kinase family [Arabidopsis thaliana]:atp binding	GO:0005886, GO:0016020, GO:0004674, GO:0005524, GO:0005739, GO:0006468, GO:0009536	6.38502	3.38892	5.53951	3.89979	3.93646	4.79165	3.08779	3.34656	2.12534	1.93421	1.44704	2.45926	3.45655	3.04515	3.35826	3.45198	4.48896	4.21502
Pp3c1_18350V3.1	Pp3c1_18350V1.1		Pp1s43_41V6.1			Phpat.001G069000											gi|743907832|ref|XP_011047354.1|	PREDICTED: 50S ribosomal protein L1, chloroplastic-like [Populus euphratica].	TETPEtr_m240lflr_HVBQ_scaffold-HVBQ-2122091-Tetraphis_pellucida_1	50s ribosomal protein l1	50s ribosomal protein l1	GO:0003723, GO:0003735, GO:0005840, GO:0006396, GO:0006412				0.126197	0.34012							0.146363				0.183044	0.19102
Pp3c1_18360V3.1	Pp3c1_18360V1.1					Phpat.001G069100											gi|720016368|ref|XP_010261134.1|	PREDICTED: uncharacterized protein LOC104600038 [Nelumbo nucifera].					6.74332	7.49435	5.9966	4.76113	4.92981	5.57643	6.94403	6.084	8.23328	6.99266	6.74028	6.90504	6.20739	6.57811	7.10087	6.34662	5.93099	6.33329
Pp3c1_18380V3.1	Pp3c1_18380V1.1	Pp1s43_42V6.1		Pp1s43_42V2.1	Phypa_123164		8152	16757	0005794:0016020	metabolic process	transferase activity, transferring glycosyl groups	Golgi apparatus:membrane					gi|595792287|ref|XP_007199892.1|	hypothetical protein PRUPE_ppa007216mg [Prunus persica].	FUNHY15tr_m240lflr_TR51848_c1_g1_i4_7_rc	glycosyl transferase	glycosyl transferase	GO:0005739, GO:0005886, GO:0016020	0.710473	0.41742	0.679924	0.520525	0.701448	0.772875	1.29744	1.24463	0.83994	0.570255	0.751927	0.826121	0.314937	1.08643	0.640478	0.834477	0.414685	1.16178
Pp3c1_18390V3.1	Pp3c1_18390V1.1	Pp1s43_45V6.1		Pp1s43_45V2.1	Phypa_207978	Phpat.001G069300	6468	0005524:0004674		protein phosphorylation	ATP binding:protein serine/threonine kinase activity						gi|657997097|ref|XP_008390925.1|	PREDICTED: serine/threonine-protein kinase HT1 isoform X1 [Malus domestica].	PHYSPtr_m240lflr_YEPO_scaffold-YEPO-2008157-cf._Physcomicromitrium_sp._9_rc	protein kinase	protein kinase	GO:0004674, GO:0004713, GO:0005524, GO:0005829, GO:0006468	6.34166	7.55357	7.24389	6.85552	8.20678	7.06772	7.25066	8.20207	8.73595	7.31791	9.62331	7.22102	8.60448	8.11933	8.84875	8.38921	7.75054	9.28792
Pp3c1_18400V3.1	Pp3c1_18400V1.1	Pp1s43_46V6.1		Pp1s43_46V2.1	Phypa_180546	Phpat.001G069400													PHYSPtr_m240lflr_YEPO_scaffold-YEPO-2000934-cf._Physcomicromitrium_sp._1	40s ribosomal protein s10	40s ribosomal protein s10	GO:0005840	530.469	605.919	582.259	663.509	590.246	534.186	425.605	502.389	507.338	514.11	526.474	488.567	509.794	523.079	473.746	495.926	459.595	477.595
Pp3c1_18420V3.1	Pp3c1_18420V1.1	Pp1s43_48V6.1		Pp1s43_48V2.1	Phypa_123215	Phpat.001G069500	19379	4604		sulfate assimilation, phosphoadenylyl sulfate reduction by phosphoadenylyl-sulfate reductase (thioredoxin)	phosphoadenylyl-sulfate reductase (thioredoxin) activity		ARATHwo_AT1G62180.1	encodes a adenosine 5'-phosphosulfate reductase, involved in sulfate assimilation. Is a major effect locus for natural variation of shoot sulfate content in Arabidopsis.	sp|P56859|MET16_EMENI	Phosphoadenosine phosphosulfate reductase	gi|302766814|ref|XP_002966827.1|	hypothetical protein SELMODRAFT_270602 [Selaginella moellendorffii].	PHYSPtr_m240lflr_YEPO_scaffold-YEPO-2079901-cf._Physcomicromitrium_sp._2	3'-phosphoadenosine-5'-phosphosulfate reductase	3'-phosphoadenosine-5'-phosphosulfate reductase	GO:0004604, GO:0016740, GO:0019379, GO:0055114	23.468	25.3034	24.7292	23.0159	29.2959	24.8223	22.0739	20.8243	17.413	19.3345	16.9312	16.9982	20.7853	25.7586	22.0987	22.8318	22.6031	19.1125
Pp3c1_18430V3.1	Pp3c1_18430V1.1					Phpat.001G069600	0044699:0046907			single-organism process:intracellular transport							gi|356547381|ref|XP_003542091.1|	PREDICTED: VHS domain-containing protein At3g16270-like [Glycine max].	PHYSPtr_m240lflr_YEPO_scaffold-YEPO-2081064-cf._Physcomicromitrium_sp._4_rc				4.95328	5.41378	4.79776	3.90435	3.87787	4.61725	6.26422	4.98019	6.25122	5.71901	7.01177	6.45697	5.48575	7.74163	6.2331	6.25041	4.64036	6.15144
Pp3c1_18440V3.1	Pp3c1_18440V1.1	Pp1s43_49V6.1		Pp1s43_49V2.1	Phypa_37148	Phpat.001G069700	0045893:0006662:0055114:0006364:0045454:0009658:0006399:0042793:0045036	0047134:0009055:0015035	0009295:0009579:0009507	positive regulation of transcription, DNA-templated:glycerol ether metabolic process:oxidation-reduction process:rRNA processing:cell redox homeostasis:chloroplast organization:tRNA metabolic process:transcription from plastid promoter:protein targeting to chloroplast	protein-disulfide reductase activity:electron carrier activity:protein disulfide oxidoreductase activity	nucleoid:thylakoid:chloroplast					gi|645251464|ref|XP_008231691.1|	PREDICTED: thioredoxin-like protein CITRX, chloroplastic [Prunus mume].	PHYSPtr_m240lflr_YEPO_scaffold-YEPO-2009449-cf._Physcomicromitrium_sp._1	thioredoxin protein	thioredoxin protein	GO:0009536, GO:0045454	22.5149	17.6259	27.3098	16.3376	26.0046	21.3752	20.8767	18.0787	18.838	17.0857	18.0519	23.4519	21.9568	19.3495	23.1452	17.9617	19.6045	20.8663
Pp3c1_18460V3.1	Pp3c1_18460V1.1	Pp1s43_50V6.1		Pp1s43_50V2.1	Phypa_162444	Phpat.001G069800													PHYSPtr_onekp_YEPO_79198			GO:0005829	39.4038	41.1213	35.4994	32.6061	40.5139	32.2743	30.9921	52.0162	31.3662	26.6953	30.2903	33.6309	19.2005	23.8234	16.2783	20.6655	28.3113	20.3366
Pp3c1_18470V3.1	Pp3c1_18470V1.1	Pp1s43_51V6.1		Pp1s43_51V2.1	Phypa_123152	Phpat.001G069900	8152	3824		metabolic process	catalytic activity						gi|836652181|ref|WP_047800401.1|	glucuronyl hydrolase [Pedobacter sp. BMA].	PHYSPtr_m240lflr_YEPO_scaffold-YEPO-2080671-cf._Physcomicromitrium_sp._3	glycosyl hydrolase family 88	glycosyl hydrolase family 88	GO:0016020, GO:0016787	9.31316	9.02408	10.6814	7.32683	10.6669	9.60511	9.4766	7.74164	10.5799	9.53186	7.38151	8.19416	12.3249	11.9984	13.0714	11.078	10.4715	10.0997
Pp3c1_18490V3.1	Pp3c1_18490V1.1	Pp1s43_55V6.1		Pp1s43_55V2.1	Phypa_180557	Phpat.001G070000	8152	0008026:0003676:0005524		metabolic process	ATP-dependent helicase activity:nucleic acid binding:ATP binding						gi|695022289|ref|XP_009398268.1|	PREDICTED: putative pre-mRNA-splicing factor ATP-dependent RNA helicase DHX16 isoform X1 [Musa acuminata subsp. malaccensis].	FUNHY15tr_m240lflr_TR15189_c0_g2_i1_2	deah (asp-glu-ala-his) box polypeptide 16	deah (asp-glu-ala-his) box polypeptide 16	GO:0003676, GO:0005524, GO:0005739, GO:0008026	10.0271	11.6135	11.8826	10.8797	10.4774	11.6875	9.71531	8.46295	12.5986	12.2253	11.0066	10.7523	11.9527	12.8716	12.7583	11.8954	10.0574	11.3984
Pp3c1_18520V3.1	Pp3c1_18520V1.1		Pp1s336_1V6.1;Pp1s43_56V6.1;Pp1s43_58V6.1				16311	0004721:0005506:0030145		dephosphorylation	phosphoprotein phosphatase activity:iron ion binding:manganese ion binding						gi|296084047|emb|CBI24435.3|	unnamed protein product, partial [Vitis vinifera].	ZEAMAwo_GRMZM2G148539_P02				4.44116	4.56288	4.76497	3.9615	3.71466	4.36028	4.55234	4.64453	4.68112	6.36771	4.95826	3.98193	4.91245	4.69894	4.79952	5.38689	4.37237	5.29358
Pp3c1_18530V3.1	Pp3c1_18530V1.1		Pp1s336_1V6.1;Pp1s43_56V6.1;Pp1s43_58V6.1			Phpat.001G070200	16311	0004721:0005506:0030145		dephosphorylation	phosphoprotein phosphatase activity:iron ion binding:manganese ion binding		ARATHwo_AT5G63870.2	Encodes a nuclear localized serine/threonine phosphatase that appears to be regulated by redox activity and is a positive regulator of cryptochrome mediated blue light signalling.	sp|O74789|YOU5_SCHPO	Putative serine/threonine-protein phosphatase C26H8.05c	gi|694416554|ref|XP_009336399.1|	PREDICTED: serine/threonine-protein phosphatase BSL3-like isoform X1 [Pyrus x bretschneideri].	SYNPRtr_onekp_GRKU_21155				10.4396	16.5426	13.9979	17.4958	14.8491	15.6333	11.6747	12.9562	21.0998	23.3704	16.8914	15.0799	15.0106	17.7647	16.8857	20.1911	15.038	16.428
Pp3c1_1860V3.1	Pp3c1_1860V1.1	Pp1s200_19V6.1		Pp1s200_19V2.1	Phypa_169190	Phpat.001G007700	6886		0016021:0005783	intracellular protein transport		integral component of membrane:endoplasmic reticulum					gi|502163250|ref|XP_004512776.1|	PREDICTED: uncharacterized protein LOC101501449 [Cicer arietinum].	PHYSPtr_m240lflr_YEPO_scaffold-YEPO-2076728-cf._Physcomicromitrium_sp._2	T1N15.5; expressed protein	T1N15.5; expressed protein	GO:0005783, GO:0016020, GO:0016023	35.2458	30.1129	24.5062	33.7878	22.4931	26.1347	31.9604	40.0882	33.1738	28.2819	34.9869	33.0299	31.4916	25.934	25.6378	32.9548	32.6202	26.4722
Pp3c1_18620V3.1	Pp3c1_18620V1.1
Pp3c1_18680V3.1	Pp3c1_18680V1.1					Phpat.001G070300	0009800:0006559	45548	5737	cinnamic acid biosynthetic process:L-phenylalanine catabolic process	phenylalanine ammonia-lyase activity	cytoplasm					gi|297788448|ref|XP_002862326.1|	predicted protein, partial [Arabidopsis lyrata subsp. lyrata].	BRYARtr_onekp_JMXW_41438				1.41961	2.10543	2.47042	0.692981	1.01167	0.629445	0.713887	1.81958	0.840996	1.15196	0.561352	0.477208	0.32271	0.684983	0.727772	1.12032	0.622809	0.516571
Pp3c1_18690V3.1	Pp3c1_18690V1.1																													0.306789
Pp3c1_18700V3.1	Pp3c1_18700V1.1
Pp3c1_1870V3.1	Pp3c1_1870V1.1	Pp1s200_18V6.1		Pp1s200_18V2.1	Phypa_143267	Phpat.001G007800	6635	4300	0070062:0005739	fatty acid beta-oxidation	enoyl-CoA hydratase activity	extracellular vesicular exosome:mitochondrion					gi|532015503|ref|XP_005351516.1|	PREDICTED: enoyl-CoA hydratase, mitochondrial [Microtus ochrogaster].	PHYSPtr_m240lflr_YEPO_scaffold-YEPO-2080279-cf._Physcomicromitrium_sp._3_rc	enoyl-CoA hydratase	enoyl-CoA hydratase	GO:0004300, GO:0005515, GO:0005739, GO:0005759, GO:0006635	21.0346	29.0296	21.439	14.1003	8.68368	18.0524	98.9209	89.3038	63.0556	63.2179	60.495	57.0548	36.7376	45.2192	41.8287	41.5226	25.1495	55.284				-1.02249		2.14658	1.81345		1.57876
Pp3c1_1880V3.1	Pp3c1_1880V1.1	Pp1s200_17V6.1		Pp1s200_17V2.1	Phypa_220794	Phpat.001G007900	0055114:0080110:0051792	0020037:0016709:0005506	16020	oxidation-reduction process:sporopollenin biosynthetic process:medium-chain fatty acid biosynthetic process	heme binding:oxidoreductase activity, acting on paired donors, with incorporation or reduction of molecular oxygen, NAD(P)H as one donor, and incorporation of one atom of oxygen:iron ion binding	membrane	ARATHwo_AT4G20235.1	"cytochrome P450, family 71, subfamily A, polypeptide 28" (CYP71A28); FUNCTIONS IN: electron carrier activity, monooxygenase activity, iron ion binding, heme binding; INVOLVED IN: biological_process unknown; LOCATED IN: cellular_component unknown; EXPRESSED IN: 13 plant structures; EXPRESSED DURING: 6 growth stages; CONTAINS InterPro DOMAIN/s: Cytochrome P450 (InterPro:IPR001128), Cytochrome P450…			gi|15223365|ref|NP_171635.1|	na	FUNHY15tr_m240lflr_TR47670_c0_g1_i1_8_rc	cytochrome p450	cytochrome p450	GO:0004497, GO:0009055, GO:0016020, GO:0020037	32.192	22.5814	8.76941	21.4948	5.96948	27.0188	12.7402	16.314	8.00455	6.816	5.21467	8.75797	16.2123	7.83425	12.4757	8.83887	26.5777	13.0944
Pp3c1_18830V3.1	Pp3c1_18830V1.1	Pp1s43_66V6.1;Pp1s43_67V6.1;Pp1s43_78V6.1;Pp1s43_79V6.1		Pp1s43_79V2.1:Pp1s43_67V2.1	Phypa_123116:Phypa_180561	Phpat.001G070400	0009800:0006559	45548	5737	cinnamic acid biosynthetic process:L-phenylalanine catabolic process	phenylalanine ammonia-lyase activity	cytoplasm					gi|116787968|gb|ABK24709.1|	unknown [Picea sitchensis].	FUNHY15tr_m240lflr_TR9451_c0_g1_i2_4	phenylalanine ammonia-lyase	phenylalanine ammonia-lyase	GO:0005737, GO:0006559, GO:0009058, GO:0009698, GO:0016211, GO:0016841, GO:0005737, GO:0006559, GO:0009058, GO:0009698, GO:0016211, GO:0016841	3.83567	7.23495	6.96101	2.15873	3.6272	1.64471	1.9375	4.54033	2.22924	3.96076	1.74912	1.82277	0.89989	1.79095	2.01924	3.629	1.709	1.41244
Pp3c1_1883V3.1																							0.444192	0.383471	0.0767085		0.0791368	0.0753049	0.0817985	0.344252				0.0681094	0.15002	0.0831725	0.0858066		0.0888903	0.0778235
Pp3c1_18840V3.1	Pp3c1_18840V1.1
Pp3c1_18850V3.1	Pp3c1_18850V1.1
Pp3c1_18860V3.1	Pp3c1_18860V1.1	Pp1s43_80V6.1		Pp1s43_80V2.1	Phypa_123146	Phpat.001G070500	0044260:0009639:0019682:0043436:0015979:1901576:0044711:0006139:0051186:0055114:1901564:0006979:0044249	0020037:0004601	0031977:0009534	cellular macromolecule metabolic process:response to red or far red light:glyceraldehyde-3-phosphate metabolic process:oxoacid metabolic process:photosynthesis:organic substance biosynthetic process:single-organism biosynthetic process:nucleobase-containing compound metabolic process:cofactor metabolic process:oxidation-reduction process:organonitrogen compound metabolic process:response to oxida…	heme binding:peroxidase activity	thylakoid lumen:chloroplast thylakoid					gi|567882743|ref|XP_006433930.1|	hypothetical protein CICLE_v10001685mg [Citrus clementina].	PHYSPtr_m240lflr_YEPO_scaffold-YEPO-2079144-cf._Physcomicromitrium_sp._2	ascorbate peroxidase	ascorbate peroxidase	GO:0004601, GO:0006979, GO:0009536, GO:0009579, GO:0020037, GO:0055114	36.8609	27.5669	32.265	46.4957	53.3342	41.6025	25.9479	20.3087	20.545	27.9873	26.9171	33.5023	40.4422	36.2124	42.3342	38.3127	49.6986	39.2577
Pp3c1_18880V3.1	Pp3c1_18880V1.1	Pp1s43_83V6.1															gi|674930410|emb|CDY02901.1|	BnaC04g25850D [Brassica napus].	TAKLEtr_onekp_SKQD_9974				1.19636	0.688543	1.54951		0.639426	0.811285	1.32186	0.811288	0.363694	0.43897	0.844108	0.275162	0.404053	0.112006	0.462212		0.478823	0.314407
Pp3c1_18910V3.1	Pp3c1_18910V1.1																gi|4335731|gb|AAD17409.1|	putative retroelement pol polyprotein [Arabidopsis thaliana].	JATCUwo_Jcr4S14686.10				0.585599	6.88107	1.88773	0.903235	0.486872	1.85319	3.01949	2.11794	2.21539	3.25885	1.65271	1.04757	2.53815	2.5585	2.37558	3.66831		2.39396
Pp3c1_18911V3.1		Pp1s43_87V6.1							5856			cytoskeleton					gi|194862898|ref|XP_001970176.1|	GG10487 [Drosophila erecta].	PHYSPtr_m240lflr_YEPO_scaffold-YEPO-2010636-cf._Physcomicromitrium_sp._4_rc				14.4934	12.5267	14.636	10.641	9.68635	10.9945	21.8238	19.7601	17.3205	15.5813	14.3271	13.8671	11.9416	12.6422	11.0176	10.937	7.64457	14.7553
Pp3c1_18920V3.1	Pp3c1_18920V1.1	Pp1s43_87V6.1		Pp1s43_87V2.1	Phypa_73685				5856			cytoskeleton							FUNHY15tr_m240lflr_TR28048_c0_g1_i1_3_rc	myosin viia	myosin viia	GO:0005856	8.4427	10.3033	7.97105	8.09843	9.99102	7.31327	10.8037	5.18199	12.0648	11.8712	10.6093	9.12796	8.59584	10.2582	8.49981	6.61774	5.6112	9.29616
Pp3c1_18930V3.1	Pp3c1_18930V1.1																		BRYARtr_m240lflr_JMXW_scaffold-JMXW-2032980-Bryum_argenteum_2_rc
Pp3c1_18940V3.1	Pp3c1_18940V1.1	Pp1s43_88V6.1		Pp1s43_88V2.1	Phypa_123073	Phpat.001G070900	0009800:0006559	45548	5737	cinnamic acid biosynthetic process:L-phenylalanine catabolic process	phenylalanine ammonia-lyase activity	cytoplasm					gi|700895006|gb|AIU99853.1|	phenylalanine ammonia-lyase [Plagiochasma appendiculatum].	FUNHY15tr_m240lflr_TR9451_c0_g1_i2_4	phenylalanine ammonia-lyase	phenylalanine ammonia-lyase	GO:0005737, GO:0006559, GO:0009058, GO:0009698, GO:0016211, GO:0016841	5.40095	6.81473	9.78132	3.16312	6.72316	3.99703	3.36546	6.27094	3.4918	6.06584	3.192	3.27285	2.12026	3.6179	3.47647	4.98928	3.09888	3.5441
Pp3c1_18949V3.1		Pp1s43_89V6.1																					0.0286545	0.259743	0.31175	0.0265182	0.321619	0.034005	0.406311	0.310904	0.203257	0.147196	0.121306	0.184535	0.135487	0.150231	0.116242	0.115391	0.0401398	0.105427
Pp3c1_18990V3.1	Pp3c1_18990V1.1	Pp1s43_92V6.1;Pp1s43_93V6.1		Pp1s43_93V2.1	Phypa_73690	Phpat.001G071200											gi|302848631|ref|XP_002955847.1|	hypothetical protein VOLCADRAFT_41528, partial [Volvox carteri f. nagariensis].	PHYSPtr_m240lflr_YEPO_scaffold-YEPO-2080730-cf._Physcomicromitrium_sp._3_rc	vacuolar protein 8	vacuolar protein 8	GO:0005488	1.46012	1.66302	1.31967	0.189429	0.408434	0.971642	10.396	8.32839	4.80107	3.27709	5.29546	3.83742	3.62938	3.77393	4.31786	4.63429	2.56148	4.51862
Pp3c1_19000V3.1																							0.309561		0.582106	0.0636627	0.514743		0.133014	0.559795	0.195185	0.132516	0.242684	0.258426	0.569216	0.540993	0.651148	0.969575	0.385457	0.210917
Pp3c1_19010V3.1	Pp3c1_19010V1.1	Pp1s43_96V6.1		Pp1s43_96V2.1	Phypa_73692		0007129:0007131	5515		synapsis:reciprocal meiotic recombination	protein binding						gi|297804896|ref|XP_002870332.1|	hypothetical protein ARALYDRAFT_330097 [Arabidopsis lyrata subsp. lyrata].
Pp3c1_19060V3.1	Pp3c1_19060V1.1	Pp1s43_101V6.1		Pp1s43_101V2.1	Phypa_123214	Phpat.001G071300											gi|302770050|ref|XP_002968444.1|	hypothetical protein SELMODRAFT_231119 [Selaginella moellendorffii].	PHYSPtr_m240lflr_YEPO_scaffold-YEPO-2013665-cf._Physcomicromitrium_sp._10_rc	glyoxal oxidase	glyoxal oxidase	GO:0044464	1.4393	6.53913	4.82253	1.49126	0.565806	1.80088	5.34419	5.81377	6.12568	6.08763	3.86339	4.65133	3.86505	7.38198	7.70039	7.91705	5.06241	9.53581
Pp3c1_190V3.1	Pp3c1_190V1.1	Pp1s283_26V6.1		Pp1s283_26V2.1	Phypa_5780	Phpat.001G001300	8152	8483		metabolic process	transaminase activity				sp|P74921|ILVE_THEMA	Probable branched-chain-amino-acid aminotransferase	gi|302819538|ref|XP_002991439.1|	hypothetical protein SELMODRAFT_429722 [Selaginella moellendorffii].	PHYSPtr_m240lflr_YEPO_scaffold-YEPO-2080620-cf._Physcomicromitrium_sp._6_rc	branched-chain amino acid aminotransferase 4-amino-4-deoxychorismate lyase	branched-chain amino acid aminotransferase 4-amino-4-deoxychorismate lyase	GO:0003824, GO:0008152	8.15376	6.99332	6.85345	5.60045	5.87876	5.39251	8.43044	8.86996	7.89242	6.92632	5.78297	5.94842	7.60528	10.0749	8.72868	7.75273	7.04948	5.93744
Pp3c1_19130V3.1	Pp3c1_19130V1.1	Pp1s43_105V6.1																												0.0970311					0.0422846
Pp3c1_19176V3.1																							0.447664	0.0901759	0.162347	0.165716	0.167486	0.0531255	0.115413	0.303575			0.126342	0.144148	0.105835	0.0586758	0.0605341	0.0600912	0.125419	0.274511
Pp3c1_19190V3.1	Pp3c1_19190V1.1	Pp1s43_118V6.1		Pp1s43_118V2.1	Phypa_162454	Phpat.001G071400	0008152:0015976	0008270:0004089		metabolic process:carbon utilization	zinc ion binding:carbonate dehydratase activity						gi|590688100|ref|XP_007042852.1|	Carbonic anhydrase isoform 2 [Theobroma cacao].	PHYSPtr_m240lflr_YEPO_scaffold-YEPO-2080428-cf._Physcomicromitrium_sp._2	carbonic chloroplast precursor:carbonic anhydrase	carbonic chloroplast precursor:carbonic anhydrase	GO:0004089, GO:0005515, GO:0008270, GO:0009409, GO:0009535, GO:0009536, GO:0009570, GO:0009579, GO:0009941, GO:0010319, GO:0015976, GO:0042742, GO:0048046	800.229	547.656	482.426	913.007	972.581	867.441	494.31	664.413	218.464	190.84	299.562	539.88	480.938	131.657	374.588	120.638	801.769	418.625						-1.41754
Pp3c1_19200V3.1	Pp3c1_19200V1.1	Pp1s43_119V6.1				Phpat.001G071500											gi|907090388|gb|KNC96812.1|	hypothetical protein SPPG_08013 [Spizellomyces punctatus DAOM BR117].	PHYSPtr_m240lflr_YEPO_scaffold-YEPO-2016783-cf._Physcomicromitrium_sp._1				19.7015	21.7762	16.5752	13.843	14.1009	15.8661	19.3672	17.1005	22.7387	19.3372	19.2399	17.3456	14.9825	19.4757	15.9755	18.7905	14.5099	16.8026
Pp3c1_19210V3.1	Pp3c1_19210V1.1	Pp1s43_120V6.1		Pp1s43_120V2.1	Phypa_123160	Phpat.001G071600	44237			cellular metabolic process							gi|302787433|ref|XP_002975486.1|	hypothetical protein SELMODRAFT_415599 [Selaginella moellendorffii].	PHYSPtr_m240lflr_YEPO_scaffold-YEPO-2077073-cf._Physcomicromitrium_sp._5_rc	at5g08050 f13g24_250	at5g08050 f13g24_250	GO:0009535, GO:0009536, GO:0009579, GO:0016020	181.301	137.845	149.771	160.434	235.915	212.086	166.662	202.705	108.06	108.446	118.484	181.234	148.158	103.855	141.011	119.699	224.319	176.593
Pp3c1_19220V3.1	Pp3c1_19220V1.1	Pp1s43_121V6.1		Pp1s43_121V2.1	Phypa_73705	Phpat.001G071700	0044763:0006468	0004674:0005524		single-organism cellular process:protein phosphorylation	protein serine/threonine kinase activity:ATP binding						gi|695009869|ref|XP_009391585.1|	PREDICTED: cyclin-dependent kinase D-1-like isoform X2 [Musa acuminata subsp. malaccensis].	FUNHY15tr_m240lflr_TR46478_c0_g1_i1_2_rc	CDC2+/CDC28-related protein kinase R2	CDC2+/CDC28-related protein kinase R2	GO:0000079, GO:0000718, GO:0003713, GO:0005524, GO:0005675, GO:0005739, GO:0006367, GO:0006368, GO:0006468, GO:0008022, GO:0008094, GO:0008283, GO:0008353, GO:0045944	3.63959	2.9446	4.02104	2.2501	3.06939	3.11548	4.34554	2.93342	4.31692	3.98444	3.8309	3.93851	4.79598	4.9073	5.24426	4.8655	4.03275	5.14051
Pp3c1_19230V3.1	Pp3c1_19230V1.1	Pp1s43_124V6.1		Pp1s43_124V2.1	Phypa_123127	Phpat.001G071800	15846	19808	0009941:0042597	polyamine transport	polyamine binding	chloroplast envelope:periplasmic space					gi|731333044|ref|XP_010677524.1|	PREDICTED: uncharacterized protein LOC104893138 isoform X2 [Beta vulgaris subsp. vulgaris].	FUNHY15tr_m240lflr_TR5591_c0_g2_i1_4_rc	periplasmic polyamine-binding protein	periplasmic polyamine-binding protein	GO:0005215, GO:0005886, GO:0006810, GO:0016020, GO:0030288	7.27249	7.10164	9.77308	7.14027	9.65277	7.98791	4.07663	2.67029	6.44175	5.59423	5.45245	5.70575	9.00392	9.1289	10.3166	7.94509	7.68798	7.81741
Pp3c1_19240V3.1	Pp3c1_19240V1.1	Pp1s43_126V6.1		Pp1s43_126V2.1	Phypa_123056	Phpat.001G071900			9507			chloroplast	ARATHwo_AT5G04440.1	Protein of unknown function (DUF1997); FUNCTIONS IN: molecular_function unknown; INVOLVED IN: biological_process unknown; LOCATED IN: chloroplast; EXPRESSED IN: 23 plant structures; EXPRESSED DURING: 13 growth stages; CONTAINS InterPro DOMAIN/s: Protein of unknown function DUF1997 (InterPro:IPR018971); BEST Arabidopsis thaliana protein match is: Protein of unknown function (DUF1997) (TAIR:AT4G311…			gi|302798917|ref|XP_002981218.1|	hypothetical protein SELMODRAFT_178693 [Selaginella moellendorffii].	PHYSPtr_onekp_YEPO_15794	T32M21.40; expressed protein	T32M21.40; expressed protein	GO:0009536	17.5845	14.0211	14.857	10.4772	15.7105	13.912	14.1062	16.4124	13.8816	12.384	11.5399	17.8086	16.8749	14.7459	18.1532	12.5635	17.9779	14.986
Pp3c1_19270V3.1	Pp3c1_19270V1.1	Pp1s43_129V6.1;Pp1s43_130V6.1		Pp1s43_129V2.1	Phypa_123070	Phpat.001G072000	8152	16763		metabolic process	transferase activity, transferring pentosyl groups						gi|836712964|gb|AKM76542.1|	initiator tRNA phosphoribosyl transferase family protein [Monsonia emarginata].	FUNHY15tr_m240lflr_TR11124_c0_g2_i1_8_rc	initiator trna phosphoribosyl-transferase	initiator trna phosphoribosyl-transferase	GO:0016757	2.57772	2.38321	1.8217	2.17758	1.2694	1.96093	1.61882	2.008	1.55654	1.34113	1.54827	1.71681	2.10951	2.32174	1.75176	1.73895	1.24068	1.57257
Pp3c1_19290V3.1	Pp3c1_19290V1.1	Pp1s43_130V6.1;Pp1s43_131V6.1		Pp1s43_131V2.1	Phypa_123085	Phpat.001G072200	0015977:0006099:0015979	8964	5737	carbon fixation:tricarboxylic acid cycle:photosynthesis	phosphoenolpyruvate carboxylase activity	cytoplasm			sp|P28594|CAPP_NOSS1	Phosphoenolpyruvate carboxylase	gi|502143864|ref|XP_004505496.1|	PREDICTED: phosphoenolpyruvate carboxylase [Cicer arietinum].	PHYSPtr_m240lflr_YEPO_scaffold-YEPO-2082477-cf._Physcomicromitrium_sp._1	phosphoenolpyruvate carboxylase	phosphoenolpyruvate carboxylase	GO:0008964, GO:0032440, GO:0055114	3.82246	5.15482	2.27706	1.98984	1.37511	2.69338	16.7365	12.9233	7.75619	6.65535	7.28707	7.82091	3.86674	3.45652	3.86419	4.6993	3.47533	5.67961				-1.74279
Pp3c1_19310V3.1	Pp3c1_19310V1.1	Pp1s43_134V6.1		Pp1s43_134V2.1	Phypa_12942	Phpat.001G072300	0006761:0006730:0046901	0004326:0005524:0008841		dihydrofolate biosynthetic process:one-carbon metabolic process:tetrahydrofolylpolyglutamate biosynthetic process	tetrahydrofolylpolyglutamate synthase activity:ATP binding:dihydrofolate synthase activity						gi|902213268|gb|KNA17217.1|	hypothetical protein SOVF_081740 [Spinacia oleracea].	CERPUR40tr_m240lflr_isotig16110_2	bifunctional protein	bifunctional protein	GO:0004326, GO:0005524, GO:0005739	9.05276	11.1048	9.6548	6.74351	7.24215	8.51522	7.4037	6.25764	7.92242	9.01051	8.12726	6.67697	7.46629	9.21717	7.44377	6.85539	5.30429	6.14635
Pp3c1_19340V3.1	Pp3c1_19340V1.1	Pp1s43_137V6.1		Pp1s43_137V2.1	Phypa_105637	Phpat.001G072400	0016192:0006886	8565	30131	vesicle-mediated transport:intracellular protein transport	protein transporter activity	clathrin adaptor complex	ARATHwo_AT4G23460.1	Adaptin family protein; FUNCTIONS IN: protein transporter activity, clathrin binding, binding; INVOLVED IN: intracellular protein transport, vesicle-mediated transport, protein transport; LOCATED IN: plasma membrane; EXPRESSED IN: 24 plant structures; EXPRESSED DURING: 13 growth stages; CONTAINS InterPro DOMAIN/s: Clathrin adaptor, alpha/beta/gamma-adaptin, appendage, Ig-like subdomain (InterPro:…	sp|O81742|APBLC_ARATH	Beta-adaptin-like protein C	gi|108708214|gb|ABF96009.1|	Adapter-related protein complex 1 beta 1 subunit, putative, expressed [Oryza sativa Japonica Group].	SCHFAtr_onekp_IGUH_167809	AP-2 complex subunit beta-1, putative	AP-2 complex subunit beta-1, putative	GO:0005515, GO:0005737, GO:0005886, GO:0006886, GO:0008565, GO:0016192, GO:0030131	11.5447	13.4793	13.8114	11.2253	12.5662	12.6378	13.2812	10.4114	14.261	10.855	9.83862	11.0073	12.5036	14.2554	14.4486	13.5095	13.8641	12.3283
Pp3c1_19370V3.1	Pp3c1_19370V1.1	Pp1s43_140V6.1		Pp1s43_140V2.1	Phypa_162459	Phpat.001G072500													PHYSPtr_onekp_YEPO_4469	Neurofilament triplet M protein (160 kDa neurofilament protein) (Neurofilament medium polypeptide) (NF-M) [Oryctolagus cuniculus]			10.597	12.7523	13.8222	6.72903	11.1561	11.1059	11.7235	8.33721	11.2915	10.7664	9.77497	12.1619	17.19	19.4816	20.6258	16.149	13.1255	17.5254
Pp3c1_19400V3.1	Pp3c1_19400V1.1	Pp1s43_141V6.1		Pp1s43_141V2.1	Phypa_123115	Phpat.001G072600	6606	8565	0005737:0005634	protein import into nucleus	protein transporter activity	cytoplasm:nucleus	ARATHwo_AT5G52000.1	Putative importin alpha isoform. When overexpressed can rescue the impa-4 decreased transformation susceptibility phenotype. Target promoter of the male germline-specific transcription factor DUO1.	sp|Q9FJ92|IMPA8_ARATH	Importin subunit alpha-8	gi|586689380|ref|XP_006842676.1|	PREDICTED: importin subunit alpha-1 [Amborella trichopoda].	PHYSPtr_onekp_YEPO_8030	F3E22.14; importin alpha-1 subunit, putative (IMPA1) [Arabidopsis thaliana]	F3E22.14; importin alpha-1 subunit, putative (IMPA1) [Arabidopsis thaliana]	GO:0005488, GO:0005643, GO:0005737, GO:0006606, GO:0008565, GO:0016020	22.9087	24.8594	23.6188	17.6498	16.7358	18.3622	24.4374	22.9405	22.8044	20.1239	20.6344	19.9693	20.4601	24.3449	23.1807	20.7142	18.4788	20.8078
Pp3c1_1940V3.1	Pp3c1_1940V1.1	Pp1s200_12V6.1		Pp1s200_12V2.1	Phypa_169186	Phpat.001G008000							ARATHwo_AT1G73040.1	Mannose-binding lectin superfamily protein; CONTAINS InterPro DOMAIN/s: Mannose-binding lectin (InterPro:IPR001229); BEST Arabidopsis thaliana protein match is: Mannose-binding lectin superfamily protein (TAIR:AT1G19715.2); Has 1381 Blast hits to 855 proteins in 48 species: Archae - 0; Bacteria - 13; Metazoa - 1; Fungi - 0; Plants - 1366; Viruses - 0; Other Eukaryotes - 1 (source: NCBI BLink).	sp|Q9SSM3|JAL19_ARATH	Jacalin-related lectin 19	gi|460407428|ref|XP_004249154.1|	PREDICTED: jacalin-related lectin 3 isoform X2 [Solanum lycopersicum].	PHYSPtr_m240lflr_YEPO_scaffold-YEPO-2010812-cf._Physcomicromitrium_sp._3	F6F9.6; jacalin lectin family protein [Arabidopsis thaliana]			42.9715	40.8459	67.8037	48.9	53.0914	37.1289	38.7191	34.8599	67.229	54.8641	46.4314	39.8251	41.7911	51.9537	38.7681	56.3394	32.6661	37.553
Pp3c1_19420V3.1	Pp3c1_19420V1.1	Pp1s43_143V6.1;Pp1s43_144V6.1		Pp1s43_144V2.1	Phypa_73721														PHYSPtr_onekp_YEPO_15177	Dmel_CG10252; CG10252 gene product from transcript CG10252-RA [Drosophila melanogaster]			0.636753	0.766804	0.552202	0.871111	0.379788	0.722797	4.53231	4.29925	3.27953	2.75541	2.91049	2.46635	1.99627	1.95949	1.9654	2.97298	1.16345	2.85207
Pp3c1_19590V3.1	Pp3c1_19590V1.1	Pp1s43_153V6.1		Pp1s43_153V2.1	Phypa_73729												gi|641822195|gb|KDO41747.1|	hypothetical protein CISIN_1g017113mg [Citrus sinensis].	FUNHY15tr_m240lflr_TR10861_c0_g1_i2_14_rc	agenet domain-containing protein	agenet domain-containing protein	GO:0003723	17.1289	22.3103	14.1437	18.6657	15.8536	19.3122	11.9271	12.302	15.0308	17.0868	17.3769	13.1536	12.0435	11.9165	11.7271	10.9933	9.90033	13.4093
Pp3c1_19610V3.1	Pp3c1_19610V1.1	Pp1s1060_1V6.1;Pp1s43_154V6.1		Pp1s43_154V2.1	Phypa_123156	Phpat.001G073100	0006979:0055114	0020037:0004601		response to oxidative stress:oxidation-reduction process	heme binding:peroxidase activity						gi|115453185|ref|NP_001050193.1|	Os03g0369400 [Oryza sativa Japonica Group].	RACVAtr_onekp_RDOO_117705	peroxidase precursor	peroxidase precursor	GO:0004601, GO:0005576, GO:0005618, GO:0005739, GO:0006979, GO:0009055, GO:0020037, GO:0055114		0.302921	0.051939	0.0596438	0.0267916	0.0764829	0.110771	0.203955			0.0303151		0.0761832		0.0290496		0.0300936	0.0526939
Pp3c1_19620V3.1	Pp3c1_19620V1.1																gi|147819474|emb|CAN74283.1|	hypothetical protein VITISV_032452 [Vitis vinifera].	BUXAPtr_onekp_HRWG_64988
Pp3c1_19630V3.1	Pp3c1_19630V1.1																		CAJCA_17980
Pp3c1_19660V3.1	Pp3c1_19660V1.1	Pp1s43_165V6.1				Phpat.001G073200		0003682:0003677			chromatin binding:DNA binding						gi|502156378|ref|XP_004510444.1|	PREDICTED: uncharacterized protein LOC101500283 isoform X3 [Cicer arietinum].	PHYSPtr_onekp_YEPO_3332				20.3301	21.3154	22.1761	18.4061	17.8348	19.3272	34.879	32.8748	31.2756	31.5536	27.426	27.1347	18.1505	22.4065	21.2768	24.7071	17.8357	22.8741
Pp3c1_19680V3.1	Pp3c1_19680V1.1	Pp1s43_166V6.1		Pp1s43_166V2.1	Phypa_56726	Phpat.001G073300	6425	0004819:0005524	5737	glutaminyl-tRNA aminoacylation	glutamine-tRNA ligase activity:ATP binding	cytoplasm					gi|514745407|ref|XP_004960872.1|	PREDICTED: glutamine--tRNA ligase-like [Setaria italica].	FUNHY15tr_m240lflr_TR8354_c0_g2_i1_1	glutaminyl-trna synthetase	glutaminyl-trna synthetase	GO:0004819, GO:0005524, GO:0005737, GO:0005829, GO:0006425	17.4844	29.7426	25.1573	30.3234	27.0581	24.8451	20.0211	23.7135	22.5013	25.4575	21.805	21.1063	16.8833	18.1848	16.6574	19.8579	20.0711	20.009
Pp3c1_19690V3.1	Pp3c1_19690V1.1																								0.125297	0.095923			0.133612	0.140577
Pp3c1_19710V3.1	Pp3c1_19710V1.1	Pp1s43_170V6.1		Pp1s43_170V2.1	Phypa_162466	Phpat.001G073400	0022900:0032259	0016651:0008168		electron transport chain:methylation	oxidoreductase activity, acting on NAD(P)H:methyltransferase activity						gi|571526510|ref|XP_006599113.1|	PREDICTED: probable methyltransferase PMT20-like isoform X1 [Glycine max].	PHYSPtr_onekp_YEPO_18649	T18B16.90; early-responsive to dehydration stress protein (ERD3)	T18B16.90; early-responsive to dehydration stress protein (ERD3)	GO:0016740	62.5871	60.2736	74.3091	67.4885	73.1242	68.7005	59.6997	54.4035	59.0178	55.1167	55.2264	57.8605	82.7039	80.9772	83.8562	72.4238	75.0151	73.0321
Pp3c1_19720V3.1	Pp3c1_19720V1.1	Pp1s43_172V6.1		Pp1s43_171V2.1	Phypa_162467	Phpat.001G073500													FUNHYSPOtr_m240lflr_Fh.sd_1294_C1_1				8.89184	5.8154	7.81736	3.95416	6.62468	5.48165	7.44293	7.67434	3.1127	2.37281	4.39979	5.70155	2.73009	4.23805	5.15304	4.49529	14.5588	9.48885
Pp3c1_19750V3.1	Pp3c1_19750V1.1	Pp1s704_1V6.1																	DIPFOtr_onekp_AWOI_14260			GO:0005886, GO:0016020
Pp3c1_19762V3.1																							0.45403	0.337998	0.238631	0.219225	0.221567	0.140559	0.279912	0.696103	0.112021	0.253512	0.22285	0.190692	0.186677	0.232866	0.427095	0.317977	0.193569	0.556829
Pp3c1_19769V3.1		Pp1s704_9V6.1																	PHYSPtr_m240lflr_YEPO_scaffold-YEPO-2017797-cf._Physcomicromitrium_sp._2				0.178719		0.108022	0.0826974	0.0371471	0.0706968	0.422362	0.525178	0.676116	0.420779	0.16813	0.223795	0.0704198	0.234249	0.0805559	0.199916	0.333804	0.109592
Pp3c1_19780V3.1	Pp3c1_19780V1.1	Pp1s43_173V6.1		Pp1s43_173V2.1	Phypa_73744		0006468:0009966	0005524:0004674		protein phosphorylation:regulation of signal transduction	ATP binding:protein serine/threonine kinase activity				sp|P29620|CDKD1_ORYSJ	Cyclin-dependent kinase D-1	gi|302755054|ref|XP_002960951.1|	hypothetical protein SELMODRAFT_73444, partial [Selaginella moellendorffii].	FUNHY15tr_m240lflr_TR30090_c0_g1_i1_1			GO:0016020	0.651462	0.601463	0.612513	0.318194	0.767311	0.708681	0.723137	0.981726	0.51345	0.511271	0.638401	0.893467	0.941206	0.498095	0.562811	0.461529	0.709784	0.821157
Pp3c1_19800V3.1	Pp3c1_19800V1.1	Pp1s43_176V6.1		Pp1s43_174V2.1	Phypa_73745																										0.404104		0.200978
Pp3c1_19830V3.1	Pp3c1_19830V1.1	Pp1s43_178V6.1		Pp1s43_178V2.1	Phypa_16331		0006468:0009966	0005524:0004674		protein phosphorylation:regulation of signal transduction	ATP binding:protein serine/threonine kinase activity						gi|743927702|ref|XP_011008032.1|	PREDICTED: mitogen-activated protein kinase kinase kinase ANP1-like [Populus euphratica].	FUNHY15tr_m240lflr_TR30090_c0_g1_i1_1	MCO15.4; protein kinase family	MCO15.4; protein kinase family	GO:0004674, GO:0004713, GO:0005524, GO:0006468						0.0386244									0.0220054	0.0218444
Pp3c1_19831V3.1		Pp1s43_178V6.1																	FUNHY15tr_m240lflr_TR43726_c0_g1_i1_6_rc															0.0372511
Pp3c1_19850V3.1	Pp3c1_19850V1.1	Pp1s43_181V6.1
Pp3c1_19859V3.1		Pp1s43_183V6.1;Pp1s43_186V6.1																					1.05276	1.65795	0.694157	0.35428	0.0954842	0.545164	1.94924	2.20662	0.923265	0.958676	1.35052	1.06832	0.76929	0.928269	0.776488	0.385403	0.187692	0.86857
Pp3c1_19940V3.1	Pp3c1_19940V1.1					Phpat.001G073900																	6.43108	8.07441	6.76248	6.68539	4.28481	6.37737	12.2079	9.02094	12.2481	10.352	12.9289	10.0231	9.63271	11.9511	11.1383	10.5838	8.02151	11.5066
Pp3c1_19950V3.1	Pp3c1_19950V1.1	Pp1s43_193V6.1		Pp1s43_193V2.1	Phypa_73750	Phpat.001G074000													FUNHY15tr_m240lflr_TR25548_c0_g1_i1_1	MGC80299; MGC80299 protein [Xenopus laevis]	MGC80299; MGC80299 protein [Xenopus laevis]	GO:0016020	3.15544	5.7206	3.56015	2.72552	3.4105	3.89443	4.9353	7.53212	3.76029	3.62006	4.334	5.05768	4.87383	5.45935	5.57536	4.96982	4.30233	4.90186
Pp3c1_19980V3.1	Pp3c1_19980V1.1	Pp1s43_196V6.1				Phpat.001G074100	6468	0016597:0005524:0004674		protein phosphorylation	amino acid binding:ATP binding:protein serine/threonine kinase activity						gi|922396415|ref|XP_003592134.2|	ACT-like tyrosine kinase family protein [Medicago truncatula].	FUNHY15tr_m240lflr_TR14203_c1_g1_i2_5_rc				13.9964	14.5706	14.1627	14.9842	14.7888	13.0409	13.8899	15.3099	15.0034	15.5401	15.7684	15.6653	13.192	14.0484	14.2621	14.2534	14.7347	15.6446
Pp3c1_20010V3.1	Pp3c1_20010V1.1	Pp1s43_199V6.1		Pp1s43_199V2.1	Phypa_208036	Phpat.001G074200	32259	8168		methylation	methyltransferase activity						gi|218197399|gb|EEC79826.1|	hypothetical protein OsI_21282 [Oryza sativa Indica Group].	PHYSPtr_onekp_YEPO_18693	T16O9.7; dehydration-responsive family protein	T16O9.7; dehydration-responsive family protein	GO:0016020, GO:0016740	54.1907	44.7356	48.3421	44.0385	39.9119	50.3076	42.9822	34.4097	39.4596	35.5229	34.0677	37.7823	56.6632	51.2444	57.8709	50.9436	52.7331	44.3697
Pp3c1_20030V3.1	Pp3c1_20030V1.1	Pp1s43_204V6.1		Pp1s43_204V2.1	Phypa_40855	Phpat.001G074300	1901576:0044710:0044238	0016779:0016616		organic substance biosynthetic process:single-organism metabolic process:primary metabolic process	nucleotidyltransferase activity:oxidoreductase activity, acting on the CH-OH group of donors, NAD or NADP as acceptor						gi|326529321|dbj|BAK01054.1|	predicted protein [Hordeum vulgare subsp. vulgare].	PHYSPtr_m240lflr_YEPO_scaffold-YEPO-2007587-cf._Physcomicromitrium_sp._2	eukaryotic translation initiation factor subunit 5 epsilon	eukaryotic translation initiation factor subunit 5 epsilon	GO:0005515, GO:0005737, GO:0006446, GO:0006950, GO:0010033, GO:0016740, GO:0048731, GO:0051716	21.8544	23.1858	25.0752	25.4686	23.4566	26.1793	17.6139	17.4902	22.3627	23.08	21.605	20.939	21.1306	23.7897	20.0723	21.4908	18.3915	19.6855
Pp3c1_20040V3.1	Pp3c1_20040V1.1	Pp1s43_205V6.1		Pp1s43_205V2.1	Phypa_123231	Phpat.001G074400	0032502:0000398:0051302	0003676:0008270:0000166	5634	developmental process:mRNA splicing, via spliceosome:regulation of cell division	nucleic acid binding:zinc ion binding:nucleotide binding	nucleus					gi|901814790|gb|KMZ69155.1|	RNA binding protein [Zostera marina].	FUNHY15tr_m240lflr_TR20635_c0_g1_i1_2	rna binding protein	rna binding protein	GO:0000166, GO:0003723, GO:0005634, GO:0005654, GO:0005689, GO:0006397, GO:0008270, GO:0008380	12.1077	13.816	14.28	9.63127	9.21813	12.5926	16.0751	12.977	12.5449	13.4525	11.5823	11.6084	11.6856	13.2247	11.9266	10.4089	9.40141	12.9303
Pp3c1_20050V3.1	Pp3c1_20050V1.1	Pp1s43_206V6.1;Pp1s43_207V6.1		Pp1s43_207V2.1	Phypa_162473	Phpat.001G074500	0048831:0023014:0009888:0048519:1901360:0044238:0042440:0032870:0006970:0048513:0051171:0046483:0048580:0031323:0006725:0000160:0034641:0009737	0019900:0004888:0000155	16020	regulation of shoot system development:signal transduction by phosphorylation:tissue development:negative regulation of biological process:organic cyclic compound metabolic process:primary metabolic process:pigment metabolic process:cellular response to hormone stimulus:response to osmotic stress:organ development:regulation of nitrogen compound metabolic process:heterocycle metabolic process:reg…	kinase binding:transmembrane signaling receptor activity:phosphorelay sensor kinase activity	membrane			sp|A7N6S2|CQSS_VIBCB	CAI-1 autoinducer sensor kinase/phosphatase CqsS	gi|18421494|ref|NP_568532.1|	histidine kinase 2 [Arabidopsis thaliana].	TIMAUtr_onekp_ZQRI_18463	histidine kinase 3	histidine kinase 3	GO:0000155, GO:0000156, GO:0000160, GO:0005524, GO:0005886, GO:0016020, GO:0018106	1.18144	1.65428	1.65459	1.03336	1.21285	1.25671	0.965768	1.29946	1.60453	1.02691	1.01656	1.14436	1.87342	2.03007	2.14308	1.81796	2.00818	1.52845
Pp3c1_20081V3.1																														0.173847
Pp3c1_20090V3.1	Pp3c1_20090V1.1	Pp1s43_209V6.1		Pp1s43_209V2.1	Phypa_123063	Phpat.001G074800		0005509:0016757	0042175:0005794		calcium ion binding:transferase activity, transferring glycosyl groups	nuclear outer membrane-endoplasmic reticulum membrane network:Golgi apparatus					gi|702479913|ref|XP_010032911.1|	PREDICTED: uncharacterized protein LOC104422318 [Eucalyptus grandis].	PHYSPtr_m240lflr_YEPO_scaffold-YEPO-2081936-cf._Physcomicromitrium_sp._3	T32A17.120; expressed protein [Arabidopsis thaliana]	T32A17.120; expressed protein [Arabidopsis thaliana]	GO:0016020	33.6259	30.6518	32.207	19.1401	23.851	27.0822	21.308	21.267	22.8926	19.996	17.1559	18.1134	28.8167	29.3757	29.349	23.033	26.6363	24.0338
Pp3c1_200V3.1	Pp3c1_200V1.1	Pp1s283_27V6.1		Pp1s283_27V2.1	Phypa_148768	Phpat.001G001400	0046777:0071482:0006364:0035970:0010027:0010155:0010207	0046872:0004721	9570	protein autophosphorylation:cellular response to light stimulus:rRNA processing:peptidyl-threonine dephosphorylation:thylakoid membrane organization:regulation of proton transport:photosystem II assembly	metal ion binding:phosphoprotein phosphatase activity	chloroplast stroma					gi|672168243|ref|XP_008804117.1|	PREDICTED: probable protein phosphatase 2C 26 isoform X1 [Phoenix dactylifera].	PLAAStr_onekp_NWQC_13829	T27E13.9; expressed protein	T27E13.9; expressed protein	GO:0009507, GO:0009536, GO:0016787	16.8392	15.9828	15.5948	16.4819	18.5563	16.2804	15.5504	16.1288	15.3594	14.9301	14.1232	13.8057	16.5765	17.5573	15.3604	16.2185	15.246	15.7048
Pp3c1_20100V3.1	Pp3c1_20100V1.1	Pp1s43_210V6.1		Pp1s43_210V2.1	Phypa_162474	Phpat.001G074900			0005840:0005739			ribosome:mitochondrion					gi|685333110|ref|XP_009104215.1|	PREDICTED: 54S ribosomal protein L51, mitochondrial-like isoform X2 [Brassica rapa].	PHYSPtr_onekp_YEPO_73629				16.1767	12.3826	18.9964	13.3453	13.6608	13.7672	14.8352	10.3431	13.7697	13.7112	13.8921	12.1045	17.647	17.9317	18.5621	12.7805	12.2367	14.6244
Pp3c1_2010V3.1	Pp3c1_2010V1.1	Pp1s200_1V6.1		Pp1s200_1V2.1	Phypa_169185	Phpat.001G008100	0010155:0010218:0010114:0009744:0046777:0009637:0019344:0045038	0046872:0042802	0009941:0005786:0009570:0080085:0009535	regulation of proton transport:response to far red light:response to red light:response to sucrose:protein autophosphorylation:response to blue light:cysteine biosynthetic process:protein import into chloroplast thylakoid membrane	metal ion binding:identical protein binding	chloroplast envelope:signal recognition particle, endoplasmic reticulum targeting:chloroplast stroma:signal recognition particle, chloroplast targeting:chloroplast thylakoid membrane					gi|698438434|ref|XP_009805017.1|	PREDICTED: uncharacterized protein C6C3.02c-like [Nicotiana sylvestris].	PHYSPtr_m240lflr_YEPO_scaffold-YEPO-2015092-cf._Physcomicromitrium_sp._3	MSJ1.24; expressed protein [Arabidopsis thaliana]	MSJ1.24; expressed protein [Arabidopsis thaliana]	GO:0009536	26.2057	26.2109	33.3921	29.9365	29.7351	26.1386	30.6884	28.2954	31.2474	29.7798	34.8254	30.117	36.3476	33.5382	37.5492	30.2977	26.0682	29.1525
Pp3c1_20124V3.1																								0.0246378		0.0226383	0.0305069	0.0580595	0.063066	0.0663539	0.0347036	0.125659		0.0262559	0.086748		0.0330781	0.0985083	0.137068	0.0900019
Pp3c1_20151V3.1		Pp1s43_215V6.1																													0.10889		0.541557		0.0907305	0.100604		0.412122		0.0941338
Pp3c1_20190V3.1	Pp3c1_20190V1.1	Pp1s43_223V6.1															gi|255543901|ref|XP_002513013.1|	conserved hypothetical protein [Ricinus communis].	LEUBRtr_m240lflr_ZACW_scaffold-ZACW-2090324-Leucodon_sciuroides_2_rc	unknown [Picea sitchensis]	unknown [Picea sitchensis]	GO:0000276, GO:0015078, GO:0015986, GO:0016020	31.8751	20.6792	28.8648	19.9983	21.0077	22.3462	27.4901	25.6156	25.9092	21.9971	25.2912	24.168	32.3153	28.5466	35.0493	26.4944	24.2325	25.7368
Pp3c1_20220V3.1	Pp3c1_20220V1.1	Pp1s43_227V6.1		Pp1s43_226V2.1	Phypa_73769																		5.01578	3.36788	1.37802	3.44622	0.852989	3.33693	0.587785	1.33993	0.107814	0.487985	0.321724	0.652558	1.16784	1.29493	1.23317	1.12214	1.17103	0.932036
Pp3c1_20230V3.1	Pp3c1_20230V1.1	Pp1s43_228V6.1		Pp1s43_228V2.1	Phypa_15031	Phpat.001G075100	0010413:0016926:0010228:0045492:0050665	0003676:0046872:0004565	48046	glucuronoxylan metabolic process:protein desumoylation:vegetative to reproductive phase transition of meristem:xylan biosynthetic process:hydrogen peroxide biosynthetic process	nucleic acid binding:metal ion binding:beta-galactosidase activity	apoplast					gi|595965737|ref|XP_007217101.1|	hypothetical protein PRUPE_ppa004346m2g, partial [Prunus persica].	FUNHY15tr_m240lflr_TR22837_c0_g4_i9_8	nucleic acid binding	nucleic acid binding	GO:0003700, GO:0005622, GO:0008270, GO:0009536, GO:0045449	22.7474	19.5761	18.5989	15.4912	19.8555	20.0959	15.1383	19.018	13.4278	17.4576	14.3871	15.9181	20.305	16.2733	18.0396	15.8031	25.0991	17.2211
Pp3c1_20250V3.1	Pp3c1_20250V1.1	Pp1s43_229V6.1																				GO:0016020		0.425611														0.189078
Pp3c1_20280V3.1	Pp3c1_20280V1.1	Pp1s43_232V6.1		Pp1s43_232V2.1	Phypa_208049	Phpat.001G075200	0000105:0006541:0009220	0000107:0016833:0016853	9570	histidine biosynthetic process:glutamine metabolic process:pyrimidine ribonucleotide biosynthetic process	imidazoleglycerol-phosphate synthase activity:oxo-acid-lyase activity:isomerase activity	chloroplast stroma			sp|C5A7A2|HIS6_THEGJ	Imidazole glycerol phosphate synthase subunit HisF	gi|356567431|ref|XP_003551923.1|	PREDICTED: imidazole glycerol phosphate synthase hisHF, chloroplastic-like [Glycine max].	FUNHY15tr_m240lflr_TR27164_c0_g1_i1_6_rc	F10M23.240; imidazole glycerol phosphate synthase hisHF, chloroplast / IGP synthase / ImGPP synthase / IGPS [EC:2.4.2.-] [KO:K02500 K02501]	F10M23.240; imidazole glycerol phosphate synthase hisHF, chloroplast / IGP synthase / ImGPP synthase / IGPS [EC:2.4.2.-] [KO:K02500 K02501]	GO:0000105, GO:0000107, GO:0003949, GO:0009536	7.60573	11.9479	12.4876	10.7025	11.2194	11.1477	7.75559	6.69729	10.7095	12.1365	9.89168	9.33621	9.71181	10.5641	10.4573	9.96177	8.88516	8.54467
Pp3c1_20290V3.1	Pp3c1_20290V1.1	Pp1s43_233V6.1;Pp1s43_234V6.1		Pp1s43_233V2.1	Phypa_162478	Phpat.001G075300											gi|566161742|ref|XP_002304341.2|	zinc finger family protein [Populus trichocarpa].	FUNHY15tr_m240lflr_TR5934_c0_g1_i1_5	F5D14.12; zinc finger (CCCH-type) family protein	F5D14.12; zinc finger (CCCH-type) family protein	GO:0003676, GO:0004518, GO:0005634, GO:0008270	4.63276	4.70326	4.75131	3.78566	6.06952	4.43042	6.06719	5.93231	5.75081	6.29762	6.13752	6.533	6.53948	6.21755	6.13123	6.08637	4.93628	6.3919
Pp3c1_20310V3.1	Pp3c1_20310V1.1	Pp1s43_234V6.1		Pp1s43_234V2.1	Phypa_123190	Phpat.001G075500	0045893:0035304:0010207:0009902:0009965:0006396:0006417:0030154:0042793:1901918:0006364:0010027	3727	0005774:0009941	positive regulation of transcription, DNA-templated:regulation of protein dephosphorylation:photosystem II assembly:chloroplast relocation:leaf morphogenesis:RNA processing:regulation of translation:cell differentiation:transcription from plastid promoter:negative regulation of exoribonuclease activity:rRNA processing:thylakoid membrane organization	single-stranded RNA binding	vacuolar membrane:chloroplast envelope					gi|922364036|ref|XP_003609772.2|	PsbB mRNA maturation factor Mbb1 [Medicago truncatula].	FUNHY15tr_m240lflr_TR25695_c0_g2_i1_3	tpr domain containingexpressed	tpr domain containingexpressed	GO:0005488, GO:0005886, GO:0006396, GO:0006417, GO:0009536, GO:0009657, GO:0009941	24.6077	22.35	25.7527	23.1301	27.2894	23.8778	21.6112	19.3202	18.9507	24.5847	20.247	21.5962	22.3708	19.5476	22.9136	21.0719	22.9806	22.9262
Pp3c1_20320V3.1		Pp1s43_235V6.1				Phpat.001G075600	0006952:0009607	5516	16021	defense response:response to biotic stimulus	calmodulin binding	integral component of membrane	ARATHwo_AT3G05940.1	Protein of unknown function (DUF300); INVOLVED IN: biological_process unknown; LOCATED IN: endomembrane system; EXPRESSED IN: 22 plant structures; EXPRESSED DURING: 13 growth stages; CONTAINS InterPro DOMAIN/s: Protein of unknown function DUF300 (InterPro:IPR005178); BEST Arabidopsis thaliana protein match is: Protein of unknown function (DUF300) (TAIR:AT5G26740.3); Has 926 Blast hits to 920 prot…	sp|Q6ZMB5|T184A_HUMAN	Transmembrane protein 184A	gi|565480222|ref|XP_006297751.1|	hypothetical protein CARUB_v10013786mg [Capsella rubella].	PHYSPtr_m240lflr_YEPO_scaffold-YEPO-2078113-cf._Physcomicromitrium_sp._3_rc				3.30626	2.30539	1.13754	0.965004	0.507481	2.05236	11.245	11.8658	5.41211	4.44196	4.88089	5.29577	1.86394	2.90014	2.40735	2.86769	1.67445	3.5246
Pp3c1_20330V3.1	Pp3c1_20330V1.1	Pp1s43_236V6.1		Pp1s43_236V2.1	Phypa_123168	Phpat.001G075700	6508	4197		proteolysis	cysteine-type endopeptidase activity						gi|470115243|ref|XP_004293812.1|	PREDICTED: metacaspase-4 [Fragaria vesca subsp. vesca].	PHYSPtr_m240lflr_YEPO_scaffold-YEPO-2019669-cf._Physcomicromitrium_sp._7_rc	metacaspase type ii	metacaspase type ii	GO:0004197, GO:0006508	36.6285	31.1612	36.3517	70.26	51.102	43.1328	31.2218	42.6729	41.1875	37.6729	43.9436	58.8581	33.1619	24.6592	23.2985	31.9162	53.1327	46.5795
Pp3c1_20350V3.1	Pp3c1_20350V1.1	Pp1s43_239V6.1		Pp1s43_239V2.1	Phypa_123059	Phpat.001G075800	0005975:0006508	0004553:0004197		carbohydrate metabolic process:proteolysis	hydrolase activity, hydrolyzing O-glycosyl compounds:cysteine-type endopeptidase activity						gi|115464679|ref|NP_001055939.1|	Os05g0496500 [Oryza sativa Japonica Group].	PHYSPtr_onekp_YEPO_18765	metacaspase type ii:latex-abundant protein	metacaspase type ii:latex-abundant protein	GO:0004197, GO:0006508	18.6546	12.75	20.9742	26.1975	21.9356	20.6093	15.2728	14.667	18.5908	19.0347	21.4094	21.3882	17.5019	17.2803	17.0534	22.1374	23.7035	16.7541
Pp3c1_20360V3.1	Pp3c1_20360V1.1	Pp1s43_240V6.1		Pp1s43_240V2.1	Phypa_162483	Phpat.001G075900											gi|302779888|ref|XP_002971719.1|	hypothetical protein SELMODRAFT_441558 [Selaginella moellendorffii].	FUNHY15tr_m240lflr_TR27548_c0_g1_i2_5_rc				8.89165	12.4227	10.1767	7.77579	8.22002	8.1705	8.34928	7.72245	10.5312	9.42845	9.07087	9.98147	10.5106	10.4355	10.0159	9.78931	8.02185	9.16408
Pp3c1_20380V3.1	Pp3c1_20380V1.1	Pp1s43_247V6.1		Pp1s43_247V2.1	Phypa_123193	Phpat.001G076000	6534	0030170:0031071		cysteine metabolic process	pyridoxal phosphate binding:cysteine desulfurase activity						gi|302790383|ref|XP_002976959.1|	hypothetical protein SELMODRAFT_105841 [Selaginella moellendorffii].	PHYSPtr_m240lflr_YEPO_scaffold-YEPO-2081012-cf._Physcomicromitrium_sp._5_rc	cysteine desulfurase	cysteine desulfurase	GO:0005634, GO:0005739, GO:0005759, GO:0005829, GO:0006461, GO:0006534, GO:0006777, GO:0018283, GO:0030170, GO:0031071, GO:0042803	0.0919081	0.0925683	0.0666616	0.153101	0.0687719	0.0218139	1.32692	0.648188	1.01702	0.566548	1.01161	0.729994	0.760497	0.963719	1.31737	0.59218	0.566485	0.676305
Pp3c1_2040V3.1	Pp3c1_2040V1.1	Pp1s445_2V6.1		Pp1s445_2V2.1	Phypa_100880	Phpat.001G008200	6629	16788		lipid metabolic process	hydrolase activity, acting on ester bonds						gi|719974231|ref|XP_010244330.1|	PREDICTED: GDSL esterase/lipase At5g03610-like isoform X2 [Nelumbo nucifera].	PHYSPtr_onekp_YEPO_15600	F17C15.30; GDSL-motif lipase/hydrolase protein	F17C15.30; GDSL-motif lipase/hydrolase protein	GO:0006629	31.4584	18.9293	8.79189	11.3995	10.0636	18.8238	22.8132	19.3367	5.68306	20.2963	25.2016	31.0889	22.189	12.3926	17.2185	35.7191	31.7286	44.0179	1.10561								1.46852
Pp3c1_20410V3.1	Pp3c1_20410V1.1
Pp3c1_20420V3.1	Pp3c1_20420V1.1	Pp1s43_251V6.1															gi|125550995|gb|EAY96704.1|	hypothetical protein OsI_18626 [Oryza sativa Indica Group].	PLAAStr_onekp_NWQC_131741	receptor protein	receptor protein	GO:0005515														0.40002
Pp3c1_20430V3.1	Pp3c1_20430V1.1	Pp1s43_252V6.1		Pp1s43_252V2.1	Phypa_123213	Phpat.001G076100	43547	8270		positive regulation of GTPase activity	zinc ion binding						gi|219363003|ref|NP_001136707.1|	uncharacterized protein LOC100216842 [Zea mays].	PHYSPtr_onekp_YEPO_14177	zinc finger protein glo3-like	zinc finger protein glo3-like	GO:0007275, GO:0008060, GO:0008270, GO:0032312	18.8718	11.4538	12.6805	8.95924	7.51906	10.0053	6.25548	7.71177	5.25026	3.96584	3.07808	4.62987	4.92512	5.65382	6.26372	5.19802	12.1537	5.56073			-1.35266
Pp3c1_20440V3.1	Pp3c1_20440V1.1					Phpat.001G076200		0046872:0003723:0000166			metal ion binding:RNA binding:nucleotide binding		ARATHwo_AT3G27700.1	zinc finger (CCCH-type) family protein / RNA recognition motif (RRM)-containing protein; FUNCTIONS IN: RNA binding, nucleotide binding, zinc ion binding, nucleic acid binding; INVOLVED IN: biological_process unknown; LOCATED IN: cellular_component unknown; EXPRESSED IN: 23 plant structures; EXPRESSED DURING: 13 growth stages; CONTAINS InterPro DOMAIN/s: Zinc finger, CCCH-type (InterPro:IPR000571)…	sp|Q9LVX1|C3H41_ARATH	Zinc finger CCCH domain-containing protein 41	gi|672134864|ref|XP_008791086.1|	PREDICTED: zinc finger CCCH domain-containing protein 27 isoform X1 [Phoenix dactylifera].	PHYSPtr_onekp_YEPO_15807				2.1153	3.40244	1.88918	1.85534	2.00805	1.85462	2.11628	2.56917	2.48584	2.89899	2.31669	1.91461	2.20189	2.58634	2.47613	2.16136	2.45456	2.34256
Pp3c1_20580V3.1	Pp3c1_20580V1.1	Pp1s568_1V6.1;Pp1s568_2V6.1		Pp1s568_2V2.1	Phypa_31891	Phpat.001G076400	0006468:0009966	0005524:0004674		protein phosphorylation:regulation of signal transduction	ATP binding:protein serine/threonine kinase activity						gi|728820339|gb|KHG03708.1|	hypothetical protein F383_26580 [Gossypium arboreum].	PHYSPtr_onekp_YEPO_14066	F22L4.8; protein kinase family protein	F22L4.8; protein kinase family protein	GO:0004674, GO:0005524, GO:0006468, GO:0016020	20.266	20.4212	17.7314	12.8001	15.4259	19.4273	16.4778	16.3716	17.7526	21.2705	18.7576	15.6404	20.2608	20.4737	21.4472	18.3982	21.2614	18.9328
Pp3c1_20610V3.1	Pp3c1_20610V1.1	Pp1s568_5V6.1		Pp1s568_5V2.1	Phypa_201214	Phpat.001G076500	8152	16787	9507	metabolic process	hydrolase activity	chloroplast					gi|703077745|ref|XP_010090670.1|	hypothetical protein L484_017476 [Morus notabilis].	PHYSPtr_m240lflr_YEPO_scaffold-YEPO-2010084-cf._Physcomicromitrium_sp._4_rc	amidohydrolase 2	amidohydrolase 2	GO:0003824, GO:0008152	19.9483	18.5158	17.6721	13.7327	16.7986	19.4956	19.4435	18.3352	18.9361	18.0207	16.9381	17.3966	15.8937	16.6299	16.0657	13.848	16.0267	13.8215
Pp3c1_20630V3.1	Pp3c1_20630V1.1	Pp1s568_6V6.1		Pp1s568_6V2.1	Phypa_173712	Phpat.001G076600													PHYSPtr_onekp_YEPO_79083				77.1174	61.7745	52.0674	95.8495	68.5842	69.319	55.9595	101.336	50.5199	47.9435	58.24	81.8205	35.4026	23.7993	29.2802	32.6729	66.5853	55.2558			-1.11003	-1.23304
Pp3c1_20640V3.1	Pp3c1_20640V1.1	Pp1s568_8V6.1		Pp1s568_8V2.1	Phypa_228359	Phpat.001G076700	0031048:0006346:0006275:0000911:0051567:0010389:0008283:0051307:0009909:0006270:0006334	0046982:0003677	0044454:0000777:0000786	chromatin silencing by small RNA:methylation-dependent chromatin silencing:regulation of DNA replication:cytokinesis by cell plate formation:histone H3-K9 methylation:regulation of G2/M transition of mitotic cell cycle:cell proliferation:meiotic chromosome separation:regulation of flower development:DNA replication initiation:nucleosome assembly	protein heterodimerization activity:DNA binding	nuclear chromosome part:condensed chromosome kinetochore:nucleosome					gi|763732786|gb|KJA30187.1|	hypothetical protein HYPSUDRAFT_267876 [Hypholoma sublateritium FD-334 SS-4].	PHYSPtr_m240lflr_YEPO_scaffold-YEPO-2078524-cf._Physcomicromitrium_sp._2	histone	histone	GO:0000786, GO:0003677, GO:0005634, GO:0006334	13.4783	14.8889	13.0229	7.15326	9.57933	9.5168	11.5829	11.0074	13.7071	10.4848	10.4983	11.563	16.218	19.7558	15.678	13.7476	14.0083	13.1529
Pp3c1_20650V3.1	Pp3c1_20650V1.1	Pp1s540_1V6.1
Pp3c1_20660V3.1	Pp3c1_20660V1.1	Pp1s540_4V6.1		Pp1s540_4V2.1	Phypa_61991	Phpat.001G076800	0042908:0006855:0008152	0008559:0005524	0016021:0005774	xenobiotic transport:drug transmembrane transport:metabolic process	xenobiotic-transporting ATPase activity:ATP binding	integral component of membrane:vacuolar membrane					gi|731378100|ref|XP_002271761.3|	PREDICTED: ABC transporter C family member 10-like isoform X1 [Vitis vinifera].	FUNHY15tr_m240lflr_TR36037_c0_g1_i3_7_rc	multidrug resistance protein abc transporter family	multidrug resistance protein abc transporter family	GO:0005524, GO:0006810, GO:0016020, GO:0016021, GO:0016887	26.9424	24.6111	15.7742	19.0117	11.4606	15.8849	16.5318	18.6195	18.1473	17.5882	14.3829	11.4639	21.1332	18.7118	18.8673	16.0992	13.788	14.1346
Pp3c1_20670V3.1	Pp3c1_20670V1.1	Pp1s540_5V6.1		Pp1s540_5V2.1	Phypa_156407	Phpat.001G076900		0046982:0003677	0000786:0005634		protein heterodimerization activity:DNA binding	nucleosome:nucleus					gi|256251568|emb|CAR63687.1|	Putative protein similar to H3 histone, family 2 isoform 2, partial [Angiostrongylus cantonensis].	FUNHY15tr_m240lflr_TR42291_c0_g1_i1_1	histone h3	histone h3	GO:0000786, GO:0003677, GO:0005515, GO:0005634, GO:0006334	1.66492	0.838441	0.87647	0.770399	0.569321	0.732961	0.83078	0.983354	0.419061	0.655236	0.530515	0.489988	1.99981	1.2319	1.85191	1.18953	0.789957	0.922143
Pp3c1_20680V3.1	Pp3c1_20680V1.1	Pp1s540_6V6.1		Pp1s540_6V2.1	Phypa_102133	Phpat.001G077000											gi|778726383|ref|XP_011659092.1|	PREDICTED: uncharacterized protein ycf37 isoform X2 [Cucumis sativus].	PHYSPtr_m240lflr_YEPO_scaffold-YEPO-2011407-cf._Physcomicromitrium_sp._4_rc	tetratricopeptide repeat	tetratricopeptide repeat	GO:0005488, GO:0005739, GO:0009535, GO:0009536, GO:0009579	0.130797	0.570859	0.105409	0.161394	0.217492	0.258701	1.68605	1.06437	0.989643	0.50392	1.23048	0.701943	0.257687	0.40002	0.471645	0.526718	0.366446	0.213882
Pp3c1_20690V3.1	Pp3c1_20690V1.1	Pp1s540_6V6.1;Pp1s540_7V6.1		Pp1s540_7V2.1	Phypa_102134	Phpat.001G077100	0009693:0006520	0030170:0004069:0080130	0009941:0010319:0009570:0048046	ethylene biosynthetic process:cellular amino acid metabolic process	pyridoxal phosphate binding:L-aspartate:2-oxoglutarate aminotransferase activity:L-phenylalanine:2-oxoglutarate aminotransferase activity	chloroplast envelope:stromule:chloroplast stroma:apoplast					gi|922397121|ref|XP_013465824.1|	aspartate aminotransferase [Medicago truncatula].	FUNHY15tr_m240lflr_TR13265_c0_g2_i1_1	aspartate aminotransferase	aspartate aminotransferase	GO:0004069, GO:0005739, GO:0009507, GO:0009536, GO:0030170	24.6838	21.8009	25.6773	21.6956	26.9769	25.6375	34.1905	28.7897	29.6004	25.1664	26.0405	31.7598	38.4539	34.9657	39.5598	33.6389	35.8661	38.1869
Pp3c1_20700V3.1	Pp3c1_20700V1.1	Pp1s540_8V6.1		Pp1s540_8V2.1	Phypa_173681	Phpat.001G077200		0003677:0003682			DNA binding:chromatin binding						gi|677555321|gb|KFR14677.1|	Heme-binding protein 2, partial [Opisthocomus hoazin].	PHYSPtr_onekp_YEPO_78098	zgc:56136 [Danio rerio]			25.4108	21.2629	21.3739	19.6715	28.0452	19.3489	18.5264	22.7683	19.464	17.8366	21.0307	21.8816	17.9026	15.0701	17.5071	13.2937	18.4408	15.671
Pp3c1_20710V3.1	Pp3c1_20710V1.1	Pp1s540_9V6.1		Pp1s540_9V2.1	Phypa_228320	Phpat.001G077300	8152	16787		metabolic process	hydrolase activity				sp|P9WK87|NLHH_MYCTU	Carboxylesterase NlhH	gi|645248764|ref|XP_008230445.1|	PREDICTED: probable carboxylesterase 11 [Prunus mume].	PHYSPtr_onekp_YEPO_80812	cxe carboxylesterase	cxe carboxylesterase	GO:0008152, GO:0016787	7.90134	8.18398	8.21679	6.89716	6.86328	5.9577	5.51518	7.69795	8.49272	7.20047	6.0618	8.05487	7.68816	9.27099	8.04827	6.69255	7.99917	6.55896
Pp3c1_20720V3.1	Pp3c1_20720V1.1	Pp1s540_10V6.1		Pp1s540_10V2.1	Phypa_35017	Phpat.001G077400											gi|571492337|ref|XP_006592199.1|	PREDICTED: epsin-3-like [Glycine max].	PHYSPtr_onekp_YEPO_16955				6.74601	4.21797	4.81313	15.0827	5.29996	5.82676	6.03668	5.26019	10.1265	5.51067	6.28811	9.72071	3.12144	4.13712	2.48278	3.87691	3.12108	4.22526
Pp3c1_20740V3.1	Pp3c1_20740V1.1	Pp1s540_11V6.1		Pp1s540_11V2.1	Phypa_102141	Phpat.001G077500											gi|302793855|ref|XP_002978692.1|	hypothetical protein SELMODRAFT_443972 [Selaginella moellendorffii].	SCHFAtr_onekp_IGUH_162663	tetratricopeptide repeat domain 29	tetratricopeptide repeat domain 29	GO:0005488	1.14675	0.641659	1.81752	0.801838	0.572051	1.0887	5.97861	7.18892	3.94062	2.61811	3.23642	3.52842	1.65678	1.46966	2.06755	2.56552	2.28464	1.75018
Pp3c1_20750V3.1	Pp3c1_20750V1.1	Pp1s540_14V6.1					0009073:0055114	0016491:0003856		aromatic amino acid family biosynthetic process:oxidation-reduction process	oxidoreductase activity:3-dehydroquinate synthase activity						gi|548831573|gb|ERM94381.1|	hypothetical protein AMTR_s00010p00251120 [Amborella trichopoda].	FUNHY15tr_m240lflr_TR36907_c0_g1_i2_11_rc						0.0493213		0.0127207	0.0363141	0.0788911			0.0261985			0.0120573				0.0142885	0.0625478
Pp3c1_20753V3.1		Pp1s540_14V6.1					0009073:0055114	0016491:0003856		aromatic amino acid family biosynthetic process:oxidation-reduction process	oxidoreductase activity:3-dehydroquinate synthase activity						gi|565369074|ref|XP_006351162.1|	PREDICTED: uncharacterized protein LOC102591464 [Solanum tuberosum].	FUNHY15tr_m240lflr_TR36907_c0_g1_i2_11_rc					0.0466915								0.0148837	0.0163544			0.0303813				0.0142137
Pp3c1_20760V3.1		Pp1s540_16V6.1																					0.660728	4.65832	1.91692	0.122294		3.29323	0.851717	1.43379		0.509115	0.372949	0.283672	4.06136	2.42486	3.93118	4.43456	1.66601	6.80674
Pp3c1_20770V3.1	Pp3c1_20770V1.1	Pp1s257_1V6.1		Pp1s257_1V2.1	Phypa_223341	Phpat.001G077700	0006260:0006310:0006281	3677	5634	DNA replication:DNA recombination:DNA repair	DNA binding	nucleus					gi|802653494|ref|XP_012080387.1|	PREDICTED: replication protein A 70 kDa DNA-binding subunit B [Jatropha curcas].	PHYSPtr_m240lflr_YEPO_scaffold-YEPO-2081170-cf._Physcomicromitrium_sp._1	replication protein a 70 kda dna-binding subunit	replication protein a 70 kda dna-binding subunit	GO:0003677, GO:0005634, GO:0006260, GO:0006281, GO:0010224	13.8385	13.4271	13.2909	10.0409	7.3415	11.758	12.2349	7.88577	13.5422	12.7938	13.7769	11.9371	16.037	19.1829	17.1452	16.5821	14.2344	18.238
Pp3c1_20780V3.1	Pp3c1_20780V1.1	Pp1s257_3V6.1		Pp1s257_3V2.1	Phypa_8906	Phpat.001G077800		8270			zinc ion binding		ARATHwo_AT1G33480.1	RING/U-box superfamily protein; FUNCTIONS IN: zinc ion binding; CONTAINS InterPro DOMAIN/s: Zinc finger, RING-type (InterPro:IPR001841), Zinc finger, C3HC4 RING-type (InterPro:IPR018957); BEST Arabidopsis thaliana protein match is: RING/U-box superfamily protein (TAIR:AT4G10150.1); Has 8909 Blast hits to 8880 proteins in 293 species: Archae - 0; Bacteria - 9; Metazoa - 2258; Fungi - 649; Plants -…	sp|Q570X5|ATL58_ARATH	RING-H2 finger protein ATL58	gi|222641747|gb|EEE69879.1|	hypothetical protein OsJ_29694 [Oryza sativa Japonica Group].	ENCSTtr_onekp_KEFD_60497	ac009177_16 ring-h2 zinc finger protein atl6	ac009177_16 ring-h2 zinc finger protein atl6	GO:0005515, GO:0008270, GO:0016020	1.12634	2.30083	1.03556	2.07006	1.91907	2.59802	2.26991	3.87284	3.03828	5.45996	5.08166	3.15006	1.98776	2.26645	2.74581	4.77001	1.40002	2.72382
Pp3c1_20790V3.1	Pp3c1_20790V1.1	Pp1s257_4V6.1;Pp1s257_6V6.1		Pp1s257_4V2.1	Phypa_147324	Phpat.001G077900							ARATHwo_AT1G63850.1	BTB/POZ domain-containing protein; CONTAINS InterPro DOMAIN/s: BTB/POZ-like (InterPro:IPR000210); BEST Arabidopsis thaliana protein match is: BTB/POZ domain-containing protein (TAIR:AT5G60050.1); Has 277 Blast hits to 277 proteins in 16 species: Archae - 0; Bacteria - 0; Metazoa - 0; Fungi - 0; Plants - 277; Viruses - 0; Other Eukaryotes - 0 (source: NCBI BLink).	sp|Q9CAJ9|Y1385_ARATH	BTB/POZ domain-containing protein At1g63850	gi|747082167|ref|XP_011088392.1|	PREDICTED: BTB/POZ domain-containing protein At3g05675-like [Sesamum indicum].	PHYSPtr_m240lflr_YEPO_scaffold-YEPO-2081470-cf._Physcomicromitrium_sp._7_rc	protein binding	protein binding	GO:0043231, GO:0044444	14.2547	14.5998	14.4326	15.273	16.8425	15.201	19.79	19.6236	22.3495	25.1648	24.5916	21.4776	15.0782	16.2453	15.9815	17.5894	12.2435	15.9556
Pp3c1_20800V3.1		Pp1s257_6V6.1				Phpat.001G078000	6351	3682	5634	transcription, DNA-templated	chromatin binding	nucleus											0.447144		0.45044	0.206904	0.371759	0.707516	1.05672	2.42578	0.951525	1.14847	1.26195	1.4398	0.704744	0.586076	1.41082	0.300107	0.93955	1.09677
Pp3c1_20810V3.1	Pp3c1_20810V1.1	Pp1s257_5V6.1;Pp1s257_6V6.1		Pp1s257_5V2.1	Phypa_170692	Phpat.001G078100	0016192:0006886:0006351	0005198:0003682	0030132:0030130:0005634	vesicle-mediated transport:intracellular protein transport:transcription, DNA-templated	structural molecule activity:chromatin binding	clathrin coat of coated pit:clathrin coat of trans-Golgi network vesicle:nucleus					gi|302757675|ref|XP_002962261.1|	hypothetical protein SELMODRAFT_438037 [Selaginella moellendorffii].	PHYSPtr_m240lflr_YEPO_scaffold-YEPO-2005938-cf._Physcomicromitrium_sp._4_rc	F25E4.180; bromo-adjacent homology (BAH) domain-containing protein	F25E4.180; bromo-adjacent homology (BAH) domain-containing protein	GO:0003677, GO:0006350	12.1655	15.0543	15.7019	12.883	13.5047	13.2193	20.8514	17.7998	19.9023	18.9872	17.129	19.1299	17.2216	16.8303	17.5094	16.5295	15.0178	15.5658
Pp3c1_20830V3.1	Pp3c1_20830V1.1	Pp1s257_7V6.1			Phypa_170693																		0.717226		0.266774	0.408464	0.13761	0.589258	1.70685	0.748267	0.15654	0.28341	0.311415	0.355302	0.586949		0.0746037	0.444347	0.231855	0.47364
Pp3c1_20832V3.1		Pp1s257_7V6.1
Pp3c1_20859V3.1
Pp3c1_20870V3.1	Pp3c1_20870V1.1	Pp1s257_12V6.1		Pp1s257_12V2.1	Phypa_223344	Phpat.001G078300	9116	3824		nucleoside metabolic process	catalytic activity		ARATHwo_AT4G34840.1	Encodes one of the 5'-methylthioadenosine nucleosidases (AT4G38800/MTN1; AT4G34840/MTN2). Double mutant, mtn1-1mtn2-1, retains approximately 14% of the MTN enzyme activity present in the wild type and displays a pleiotropic phenotype that includes altered vasculature and impaired fertility.	sp|Q7XA67|MTN2_ARATH	5'-methylthioadenosine/S-adenosylhomocysteine nucleosidase 2	gi|565387732|ref|XP_006359642.1|	PREDICTED: 5'-methylthioadenosine/S-adenosylhomocysteine nucleosidase 1-like [Solanum tuberosum].	DIPFOtr_onekp_AWOI_70606	mta sah nucleosidase	mta sah nucleosidase	GO:0005886, GO:0008930, GO:0009693, GO:0019284, GO:0019509, GO:0030912	15.0474	16.1339	19.419	18.3165	18.6249	18.876	13.7176	12.0733	14.3277	11.287	11.2545	15.399	19.9237	18.5974	19.8585	16.6804	19.4961	17.2905
Pp3c1_20880V3.1	Pp3c1_20880V1.1	Pp1s257_13V6.1		Pp1s257_13V2.1	Phypa_94222	Phpat.001G078400											gi|116781653|gb|ABK22191.1|	unknown [Picea sitchensis].	PHYSPtr_onekp_YEPO_67700	atp binding	atp binding	GO:0005524, GO:0006457, GO:0009536	8.26292	10.3851	9.73247	7.28742	6.86986	8.71628	6.41814	5.50756	7.01338	5.98595	7.17541	8.18663	9.43347	11.108	11.3165	6.35157	8.31015	9.31094
Pp3c1_20900V3.1	Pp3c1_20900V1.1	Pp1s257_15V6.1		Pp1s257_14V2.1:Pp1s257_15V2.1	Phypa_94223:Phypa_147261	Phpat.001G078600	51641		0005886:0005829	cellular localization		plasma membrane:cytosol					gi|727536784|ref|XP_010442458.1|	PREDICTED: exocyst complex component EXO84B-like isoform X1 [Camelina sativa].	FUNHY15tr_m240lflr_TR11118_c0_g2_i1_9_rc	K21G20.4; expressed protein	K21G20.4; expressed protein	GO:0005886	4.8115	5.17798	6.79524	4.47893	5.38987	4.24613	5.3284	4.3547	5.26305	6.21534	5.91271	4.72976	6.06599	6.94824	6.97731	6.15527	4.55052	4.95399
Pp3c1_2090V3.1	Pp3c1_2090V1.1																									0.138473
Pp3c1_20910V3.1	Pp3c1_20910V1.1	Pp1s257_15V6.1;Pp1s257_16V6.1		Pp1s257_16V2.1	Phypa_5127	Phpat.001G078700							ARATHwo_AT1G22040.1	Galactose oxidase/kelch repeat superfamily protein; FUNCTIONS IN: molecular_function unknown; INVOLVED IN: N-terminal protein myristoylation; LOCATED IN: chloroplast; EXPRESSED IN: 23 plant structures; EXPRESSED DURING: 13 growth stages; CONTAINS InterPro DOMAIN/s: F-box domain, cyclin-like (InterPro:IPR001810), Galactose oxidase/kelch, beta-propeller (InterPro:IPR011043), Kelch repeat type 1 (In…	sp|Q9LM55|FBK8_ARATH	F-box/kelch-repeat protein At1g22040	gi|645271939|ref|XP_008241154.1|	PREDICTED: F-box/kelch-repeat protein At2g44130-like isoform X1 [Prunus mume].	PHYSPtr_m240lflr_YEPO_scaffold-YEPO-2017396-cf._Physcomicromitrium_sp._4	F6E13.26; kelch repeat-containing F-box family protein [Arabidopsis thaliana]			0.785565	1.06138	0.277939	0.602877	0.501791	0.454756	1.6548	0.623668	1.27755	0.66436	0.973346	0.452433	0.339731	0.45204	0.544083	0.437226	0.402598	0.39947
Pp3c1_20930V3.1	Pp3c1_20930V1.1	Pp1s257_20V6.1				Phpat.001G078800	0016310:0006096	0030955:0004743:0000287		phosphorylation:glycolytic process	potassium ion binding:pyruvate kinase activity:magnesium ion binding						gi|720033648|ref|XP_010266495.1|	PREDICTED: plastidial pyruvate kinase 4, chloroplastic isoform X1 [Nelumbo nucifera].	FUNHY15tr_m240lflr_TR41034_c0_g2_i1_5				9.98886	6.40221	10.2604	4.22762	10.9088	3.78274	6.65312	11.7253	10.0301	6.48538	5.07336	8.76208	4.62227	5.78111	5.75119	6.00763	5.17907	5.79569
Pp3c1_20960V3.1	Pp3c1_20960V1.1	Pp1s257_22V6.1;Pp1s257_23V6.1	Pp1s43_7V6.1	Pp1s257_22V2.1	Phypa_28478	Phpat.001G078900		5488			binding						gi|449811531|gb|AGF25263.1|	inducer of CBF expression 1-5 [Musa AB Group].	FUNHY15tr_m240lflr_TR10920_c0_g1_i1_3	inducer of cbf expression 1	inducer of cbf expression 1	GO:0003700, GO:0005634, GO:0030528, GO:0045449	4.93797	7.32332	6.53559	4.6999	4.05484	5.24844	6.03922	4.96888	8.10867	7.78546	7.1929	6.28568	7.02219	7.25826	6.79127	6.96797	5.10587	7.21665
Pp3c1_20980V3.1	Pp3c1_20980V1.1	Pp1s257_26V6.1;Pp1s257_27V6.1		Pp1s257_26V2.1:Pp1s257_27V2.1	Phypa_147241:Phypa_94231	Phpat.001G079000											gi|728817835|gb|KHG02595.1|	hypothetical protein F383_24486 [Gossypium arboreum].	PHYSPtr_m240lflr_YEPO_scaffold-YEPO-2012969-cf._Physcomicromitrium_sp._12_rc	F17A13.240; F-box family protein [Arabidopsis thaliana]			12.4985	17.37	11.0034	11.4705	9.6807	13.9687	11.3911	10.528	9.73419	10.1913	8.70442	9.05083	17.0272	18.1231	16.7133	15.7227	15.5017	12.2825
Pp3c1_20V3.1	Pp3c1_20V1.1	Pp1s283_2V6.1		Pp1s283_2V2.1	Phypa_2366	Phpat.001G000100		5089			Rho guanyl-nucleotide exchange factor activity						gi|697102768|ref|XP_009602942.1|	PREDICTED: rop guanine nucleotide exchange factor 7-like [Nicotiana tomentosiformis].	PHYSPtr_m240lflr_YEPO_scaffold-YEPO-2018383-cf._Physcomicromitrium_sp._3	T7H20.60; hypothetical protein [Arabidopsis thaliana]	T7H20.60; hypothetical protein [Arabidopsis thaliana]	GO:0005089, GO:0005515, GO:0005886, GO:0009536, GO:0009860, GO:0016324	9.11754	11.157	8.52011	8.61804	7.57534	9.89548	6.40219	5.82793	7.23588	6.86281	7.38637	6.25843	7.81342	9.09447	8.60886	7.30402	8.5772	7.92735
Pp3c1_21000V3.1	Pp3c1_21000V1.1	Pp1s257_28V6.1		Pp1s257_28V2.1	Phypa_196148	Phpat.001G079100											gi|116782967|gb|ABK22744.1|	unknown [Picea sitchensis].	PHYSPtr_onekp_YEPO_78585	T3G21.15; prenylated rab acceptor (PRA1) family protein	T3G21.15; prenylated rab acceptor (PRA1) family protein	GO:0005783, GO:0009536, GO:0016020, GO:0016192	30.7342	22.0512	32.8253	31.6208	28.8227	29.9126	34.2814	29.3966	31.1293	30.7752	30.9982	31.289	45.3408	44.4015	44.8527	42.2035	36.7759	35.9606
Pp3c1_21010V3.1	Pp3c1_21010V1.1
Pp3c1_21020V3.1	Pp3c1_21020V1.1	Pp1s257_29V6.1					0071704:0044238:0044763:0044710:0044767:0044237	16491	44434	organic substance metabolic process:primary metabolic process:single-organism cellular process:single-organism metabolic process:single-organism developmental process:cellular metabolic process	oxidoreductase activity	chloroplast part					gi|567220156|ref|XP_006413707.1|	hypothetical protein EUTSA_v10024211mg [Eutrema salsugineum].	STESUtr_onekp_LNSF_1315
Pp3c1_21050V3.1	Pp3c1_21050V1.1	Pp1s257_30V6.1;Pp1s257_31V6.1		Pp1s257_31V2.1	Phypa_147244		0018108:0007015:0009658	0004674:0004712:0005524:0016597:0004715	5829	peptidyl-tyrosine phosphorylation:actin filament organization:chloroplast organization	protein serine/threonine kinase activity:protein serine/threonine/tyrosine kinase activity:ATP binding:amino acid binding:non-membrane spanning protein tyrosine kinase activity	cytosol	ARATHwo_AT4G35780.1	ACT-like protein tyrosine kinase family protein; FUNCTIONS IN: protein serine/threonine/tyrosine kinase activity, protein kinase activity; INVOLVED IN: protein amino acid phosphorylation, metabolic process; EXPRESSED IN: 23 plant structures; EXPRESSED DURING: 13 growth stages; CONTAINS InterPro DOMAIN/s: Protein kinase, catalytic domain (InterPro:IPR000719), Amino acid-binding ACT (InterPro:IPR00…	sp|Q2MHE4|HT1_ARATH	Serine/threonine-protein kinase HT1	gi|823135706|ref|XP_012467612.1|	PREDICTED: serine/threonine-protein kinase EDR1 [Gossypium raimondii].	FUNHY15tr_m240lflr_TR17131_c0_g1_i1_4	F22I13.1; protein kinase family protein [Arabidopsis thaliana]:F22I13.1; protein kinase family protein	:F22I13.1; protein kinase family protein	GO:0004674, GO:0004712, GO:0004713, GO:0005524, GO:0005829, GO:0006468, GO:0009536, GO:0016597	4.30875	4.59498	4.33847	4.27838	4.10915	5.07721	5.69799	4.62004	6.17023	4.92149	4.86417	4.94029	4.9974	5.20901	5.15464	5.49797	3.69248	4.79941
Pp3c1_210V3.1	Pp3c1_210V1.1	Pp1s283_28V6.1;Pp1s283_31V6.1				Phpat.001G001500											gi|729307128|ref|XP_010528796.1|	PREDICTED: uncharacterized protein LOC104805816 [Tarenaya hassleriana].	FUNHY15tr_m240lflr_TR27326_c0_g2_i1_13_rc				4.35816	3.62318	2.51921	2.40311	2.68146	2.97362	6.97177	5.65284	6.52303	7.1368	7.28189	5.55649	3.22591	4.37906	4.04808	5.10633	3.05829	4.9088
Pp3c1_21100V3.1	Pp3c1_21100V1.1	Pp1s257_33V6.1		Pp1s257_33V2.1	Phypa_46707	Phpat.001G079400											gi|720081728|ref|XP_010242370.1|	PREDICTED: uncharacterized protein LOC104586743 [Nelumbo nucifera].	PHYSPtr_m240lflr_YEPO_scaffold-YEPO-2073981-cf._Physcomicromitrium_sp._1	T20F6.13; expressed protein [Arabidopsis thaliana]	T20F6.13; expressed protein [Arabidopsis thaliana]	GO:0016020	11.9065	12.7646	9.65589	10.8182	9.42085	9.93437	11.2639	10.4715	10.0781	9.87254	10.5422	9.93375	8.55503	7.91228	9.15504	7.96883	8.31607	8.69186
Pp3c1_21110V3.1	Pp3c1_21110V1.1	Pp1s257_34V6.1		Pp1s257_34V2.1	Phypa_147255		0055085:0006886	0022891:0008536	16021	transmembrane transport:intracellular protein transport	substrate-specific transmembrane transporter activity:Ran GTPase binding	integral component of membrane					gi|823153968|ref|XP_012476836.1|	PREDICTED: protein EXPORTIN 1A-like isoform X1 [Gossypium raimondii].	ORTLYtr_onekp_CMEQ_719	1 homolog	1 homolog	GO:0005488, GO:0005643, GO:0005737, GO:0006886, GO:0008565	0.00815575		0.00985904		0.0203423			0.0553067		0.0523692		0.00875382			0.0441135	0.0437907
Pp3c1_21114V3.1		Pp1s257_34V6.1					0055085:0006886	0022891:0008536	16021	transmembrane transport:intracellular protein transport	substrate-specific transmembrane transporter activity:Ran GTPase binding	integral component of membrane					gi|590639008|ref|XP_007029551.1|	Exportin 1A isoform 3 [Theobroma cacao].	RACVAtr_onekp_RDOO_1015													0.0109305
Pp3c1_21120V3.1	Pp3c1_21120V1.1	Pp1s257_37V6.1		Pp1s257_36V2.1:Pp1s257_37V2.1	Phypa_94238:Phypa_60547	Phpat.001G079600	0006270:0071897	0003887:0046872:0003677:0001882:0051539:0000166	5634	DNA replication initiation:DNA biosynthetic process	DNA-directed DNA polymerase activity:metal ion binding:DNA binding:nucleoside binding:4 iron, 4 sulfur cluster binding:nucleotide binding	nucleus			sp|Q9DE46|DPOLA_XENLA	DNA polymerase alpha catalytic subunit	gi|763776631|gb|KJB43754.1|	hypothetical protein B456_007G214600 [Gossypium raimondii].	FUNHY15tr_m240lflr_TR48461_c0_g1_i1_3	dna polymerase alpha catalytic subunit	dna polymerase alpha catalytic subunit	GO:0000166, GO:0001882, GO:0003677, GO:0003887, GO:0003896, GO:0005515, GO:0005730, GO:0006270, GO:0006273, GO:0006281, GO:0008408	5.59971	7.64369	7.46071	5.45282	5.8341	6.7283	7.7837	5.32749	7.8089	7.15866	7.09469	7.36115	7.34809	8.91416	7.54627	6.96208	7.23873	8.2941
Pp3c1_21140V3.1	Pp3c1_21140V1.1	Pp1s257_38V6.1		Pp1s257_38V2.1	Phypa_223358	Phpat.001G079700		0008270:0003723			zinc ion binding:RNA binding						gi|669027385|emb|CDM80730.1|	unnamed protein product [Triticum aestivum].	PHYSPtr_m240lflr_YEPO_scaffold-YEPO-2012425-cf._Physcomicromitrium_sp._8_rc	T12C14.30; zinc knuckle (CCHC-type) family protein	T12C14.30; zinc knuckle (CCHC-type) family protein	GO:0003723, GO:0005634, GO:0008270	15.0864	19.1966	17.225	12.1302	9.92932	11.3635	15.1496	14.0812	18.2279	16.2072	15.0805	15.7515	14.1623	16.4217	14.348	13.1191	12.0274	13.3305
Pp3c1_21150V3.1	Pp3c1_21150V1.1	Pp1s257_39V6.1																	LEUALtr_onekp_VMXJ_113524				0.688221			0.39807		1.32719	0.554473	0.116676	0.366135	0.331437	0.728377	0.554017	0.203382	0.789301		1.15477		0.422023
Pp3c1_21160V3.1	Pp3c1_21160V1.1	Pp1s257_40V6.1		Pp1s257_40V2.1	Phypa_196153	Phpat.001G079800	6886		5622	intracellular protein transport		intracellular	ARATHwo_AT2G38410.1	ENTH/VHS/GAT family protein; FUNCTIONS IN: protein transporter activity; INVOLVED IN: intracellular protein transport, intra-Golgi vesicle-mediated transport; LOCATED IN: Golgi stack, plasma membrane; EXPRESSED IN: 24 plant structures; EXPRESSED DURING: 15 growth stages; CONTAINS InterPro DOMAIN/s: VHS (InterPro:IPR002014), GAT (InterPro:IPR004152), VHS subgroup (InterPro:IPR018205), ENTH/VHS (In…			gi|720067466|ref|XP_010276808.1|	PREDICTED: TOM1-like protein 2 [Nelumbo nucifera].	PHYSPtr_m240lflr_YEPO_scaffold-YEPO-2010483-cf._Physcomicromitrium_sp._7_rc	vhs domain-containing protein gat domain-containing protein	vhs domain-containing protein gat domain-containing protein	GO:0005622, GO:0005829, GO:0006886	19.1393	20.6537	18.4383	19.7728	16.5134	20.1405	23.4381	23.4946	26.8476	24.1779	22.4883	23.0583	25.556	31.7415	28.7855	28.0506	20.5731	23.4967
Pp3c1_21200V3.1	Pp3c1_21200V1.1	Pp1s257_43V6.1	Pp1s1139_1V6.1;Pp1s1139_3V6.1;Pp1s257_45V6.1	Pp1s1139_3V2.1:Pp1s257_42V2.1:Pp1s1139_1V2.1	Phypa_103060:Phypa_170703:Phypa_103059	Phpat.001G079900	0031348:0019684:0009750:0006098:0009595:0009867:0009697:0006833:0009862:0010363:0010310:0010200:0009651:0006612:0043900:0050832:0042742:0000165:0019761:0009409:0055114:0010027	0051920:0004601	0048046:0010319:0009570:0005739	negative regulation of defense response:photosynthesis, light reaction:response to fructose:pentose-phosphate shunt:detection of biotic stimulus:jasmonic acid mediated signaling pathway:salicylic acid biosynthetic process:water transport:systemic acquired resistance, salicylic acid mediated signaling pathway:regulation of plant-type hypersensitive response:regulation of hydrogen peroxide metaboli…	peroxiredoxin activity:peroxidase activity	apoplast:stromule:chloroplast stroma:mitochondrion					gi|695034895|ref|XP_009404913.1|	PREDICTED: 2-Cys peroxiredoxin BAS1, chloroplastic-like [Musa acuminata subsp. malaccensis].	PHYSPtr_m240lflr_YEPO_scaffold-YEPO-2008563-cf._Physcomicromitrium_sp._3	2-cys peroxiredoxin:2-cys peroxiredoxin bas1	2-cys peroxiredoxin:2-cys peroxiredoxin bas1	GO:0016209, GO:0016491, GO:0009536, GO:0016020, GO:0045454, GO:0051920, GO:0055114	35.3079	37.2205	44.0858	45.4175	54.0668	45.5847	37.647	27.8671	35.6803	35.0109	30.6334	44.2435	42.161	43.3445	53.1981	49.294	58.571	42.1626
Pp3c1_21210V3.1	Pp3c1_21210V1.1	Pp1s1139_2V6.1																				GO:0005576, GO:0005618, GO:0005783, GO:0005886, GO:0016020
Pp3c1_21230V3.1	Pp3c1_21230V1.1		Pp1s1139_1V6.1;Pp1s1139_3V6.1;Pp1s257_45V6.1	Pp1s1139_1V2.1:Pp1s257_42V2.1:Pp1s1139_3V2.1	Phypa_103059:Phypa_170703:Phypa_103060	Phpat.001G080000	0031348:0019684:0009750:0006098:0009595:0009867:0009697:0006833:0009862:0010363:0010310:0010200:0009651:0006612:0043900:0050832:0042742:0000165:0019761:0009409:0055114:0010027	0051920:0004601	0048046:0010319:0009570:0005739	negative regulation of defense response:photosynthesis, light reaction:response to fructose:pentose-phosphate shunt:detection of biotic stimulus:jasmonic acid mediated signaling pathway:salicylic acid biosynthetic process:water transport:systemic acquired resistance, salicylic acid mediated signaling pathway:regulation of plant-type hypersensitive response:regulation of hydrogen peroxide metaboli…	peroxiredoxin activity:peroxidase activity	apoplast:stromule:chloroplast stroma:mitochondrion					gi|13265490|gb|AAG40040.2|AF324689_1	AT5g06290 [Arabidopsis thaliana].	PHYSPtr_m240lflr_YEPO_scaffold-YEPO-2008563-cf._Physcomicromitrium_sp._3	:2-cys peroxiredoxin bas1:2-cys peroxiredoxin	:2-cys peroxiredoxin bas1:2-cys peroxiredoxin	GO:0009536, GO:0016020, GO:0045454, GO:0051920, GO:0055114, GO:0016209, GO:0016491	50.0115	56.0751	66.6711	75.7394	90.4144	81.6466	55.7123	44.2744	55.829	59.8782	49.1915	68.7755	61.4644	66.1259	76.67	74.4538	92.1896	63.7443
Pp3c1_21250V3.1	Pp3c1_21250V1.1	Pp1s257_46V6.1																						0.218817															0.304336
Pp3c1_21270V3.1	Pp3c1_21270V1.1	Pp1s257_47V6.1		Pp1s257_47V2.1	Phypa_147237	Phpat.001G080100											gi|645229045|ref|XP_008221279.1|	PREDICTED: putative HVA22-like protein g [Prunus mume].	PHYSPtr_m240lflr_YEPO_scaffold-YEPO-2003406-cf._Physcomicromitrium_sp._4_rc	receptor expression-enhancing protein 3	receptor expression-enhancing protein 3	GO:0016020, GO:0016023	4.33164	6.7222	4.99584	4.62228	3.47274	4.1963	24.5001	20.2622	11.6319	11.2391	13.7531	11.979	9.48306	10.9495	9.74231	10.9466	5.17005	13.8231							1.81325
Pp3c1_21290V3.1	Pp3c1_21290V1.1	Pp1s257_49V6.1		Pp1s257_49V2.1	Phypa_94244	Phpat.001G080200									sp|Q80Y55|BSDC1_MOUSE	BSD domain-containing protein 1	gi|719999704|ref|XP_010255803.1|	PREDICTED: LOW QUALITY PROTEIN: BSD domain-containing protein 1-like [Nelumbo nucifera].	PHYSPtr_m240lflr_YEPO_scaffold-YEPO-2017835-cf._Physcomicromitrium_sp._2			GO:0009507, GO:0009536	23.8937	22.0543	21.5069	16.2158	14.6053	18.3977	26.7805	27.5377	29.696	26.853	25.929	22.0097	17.1587	25.5247	21.5398	28.3389	15.5883	21.7645
Pp3c1_21300V3.1	Pp3c1_21300V1.1		Pp1s257_51V6.1;Pp1s257_54V6.1	Pp1s257_51V2.1:Pp1s257_54V2.1	Phypa_170706:Phypa_94246	Phpat.001G080300													PHYSPtr_m240lflr_YEPO_scaffold-YEPO-2080915-cf._Physcomicromitrium_sp._2	K2A18.31; expressed protein [Arabidopsis thaliana]	K2A18.31; expressed protein [Arabidopsis thaliana]	GO:0009536, GO:0009536	2.14613	2.44502	1.78626	1.64425	1.68924	1.96234	3.03859	1.57465	2.59544	1.69433	2.50717	2.47344	3.34786	4.08108	4.42442	4.01423	2.8092	3.94806
Pp3c1_21310V3.1	Pp3c1_21310V1.1																		CERPUR40tr_m240lflr_isotig16789_1_rc
Pp3c1_21320V3.1	Pp3c1_21320V1.1	Pp1s257_55V6.1		Pp1s257_54V2.1	Phypa_94246																		0.0886045
Pp3c1_21330V3.1	Pp3c1_21330V1.1		Pp1s257_51V6.1;Pp1s257_54V6.1	Pp1s257_51V2.1:Pp1s257_54V2.1	Phypa_170706:Phypa_94246	Phpat.001G080400													PHYSPtr_m240lflr_YEPO_scaffold-YEPO-2080915-cf._Physcomicromitrium_sp._2	K2A18.31; expressed protein [Arabidopsis thaliana]	K2A18.31; expressed protein [Arabidopsis thaliana]	GO:0009536, GO:0009536	1.14343	1.15164	1.08452	0.537231	0.723961	0.876789	1.20183	0.882756	1.39754	0.768097	0.79435	1.0007	1.12288	1.79844	1.71268	1.10982	1.52781	1.96324
Pp3c1_21360V3.1	Pp3c1_21360V1.1	Pp1s257_58V6.1		Pp1s257_58V2.1	Phypa_4239	Phpat.001G080600	6511	0004842:0008270	0005737:0000151	ubiquitin-dependent protein catabolic process	ubiquitin-protein transferase activity:zinc ion binding	cytoplasm:ubiquitin ligase complex	ARATHwo_AT3G24800.1	Contains two ring finger domains and one ZZ domain. Week similarity to yeast Rad18p. Putative component of the N-end rule pathway (ubiquitin-dependent proteolysis).	sp|Q8LBL5|PRT1_ARATH	E3 ubiquitin-protein ligase PRT1	gi|657977338|ref|XP_008380577.1|	PREDICTED: E3 ubiquitin-protein ligase PRT1-like isoform X1 [Malus domestica].	PHYSPtr_m240lflr_YEPO_scaffold-YEPO-2019052-cf._Physcomicromitrium_sp._3	K7P8.19; PRT1 protein (PRT1)	K7P8.19; PRT1 protein (PRT1)	GO:0005515, GO:0005622, GO:0008270	11.0144	9.14318	7.70329	11.6549	6.85099	11.7184	16.8007	13.5228	16.5805	16.8788	15.4459	14.5639	11.5913	9.72048	9.4155	11.3745	10.5042	10.8807
Pp3c1_21370V3.1	Pp3c1_21370V1.1	Pp1s257_59V6.1		Pp1s257_59V2.1	Phypa_94249	Phpat.001G080700		46872			metal ion binding						gi|907094444|gb|KND00188.1|	hypothetical protein SPPG_04528 [Spizellomyces punctatus DAOM BR117].	PHYSPtr_onekp_YEPO_12854			GO:0003676, GO:0004518, GO:0008270	0.29237	0.185981	0.167414	0.0284814		0.109567	0.119015	0.31305	0.0654911	0.0197616	0.217143	0.264261	0.0363793			0.0206556	0.0646669	0.0566159
Pp3c1_21380V3.1		Pp1s257_60V6.1																					0.0711678	0.071679			0.0295848		0.152899	0.0965223	0.0673092	0.0609304		0.0254622	0.0280419
Pp3c1_21400V3.1	Pp3c1_21400V1.1	Pp1s257_61V6.1		Pp1s257_61V2.1	Phypa_170709	Phpat.001G080800													ENCSTtr_onekp_KEFD_57603				4.60947	3.17985	7.60253	4.23076	7.38647	3.83662	6.52792	6.81687	5.46437	5.33576	6.14814	6.19453	6.37429	6.35618	6.16472	6.37389	5.50174	7.43425
Pp3c1_21470V3.1	Pp3c1_21470V1.1	Pp1s257_67V6.1		Pp1s257_67V2.1	Phypa_147234	Phpat.001G080900	8152	0008026:0003723:0005524		metabolic process	ATP-dependent helicase activity:RNA binding:ATP binding				sp|Q5N7W4|RH30_ORYSJ	DEAD-box ATP-dependent RNA helicase 30	gi|548842188|gb|ERN02145.1|	hypothetical protein AMTR_s00045p00182070 [Amborella trichopoda].	DIPFOtr_onekp_AWOI_73741	dead (asp-glu-ala-asp) box polypeptide 42	dead (asp-glu-ala-asp) box polypeptide 42	GO:0003676, GO:0005524, GO:0005739, GO:0008026	6.61351	8.72378	8.44602	7.38403	8.32761	8.11426	7.97519	6.38003	8.53495	9.21928	7.76706	7.64805	9.07859	9.10181	9.89492	8.70567	8.74134	8.46413
Pp3c1_21480V3.1	Pp3c1_21480V1.1	Pp1s257_69V6.1		Pp1s257_69V2.1	Phypa_170710	Phpat.001G081000	8152	16837		metabolic process	carbon-oxygen lyase activity, acting on polysaccharides						gi|524589871|emb|CDD10995.1|	peptidase M23 family [Phascolarctobacterium succinatutens CAG:287].	FUNHY15tr_m240lflr_TR44377_c0_g1_i1_3	peptidase m23b	peptidase m23b	GO:0004222, GO:0006508, GO:0016998	1.69124	2.75295	2.89114	1.92877	1.17176	1.5813	2.90681	2.2706	2.98096	2.91785	3.47136	2.8054	1.23181	2.0376	1.89423	1.99502	1.29225	1.67609
Pp3c1_21510V3.1	Pp3c1_21510V1.1	Pp1s257_71V6.1		Pp1s257_71V2.1	Phypa_223370	Phpat.001G081100	0044699:0006914			single-organism process:autophagy							gi|657968785|ref|XP_008376100.1|	PREDICTED: beclin-1-like protein [Malus domestica].	FUNHY15tr_m240lflr_TR21608_c0_g1_i1_2	autophagy protein beclin1	autophagy protein beclin1	GO:0000045, GO:0000407, GO:0006623, GO:0016020	9.66555	11.0958	8.5971	8.23046	8.57299	8.58075	9.43551	11.0954	9.73127	9.36201	9.2186	8.36641	7.00268	7.93985	8.01063	7.77265	7.75776	7.70236
Pp3c1_21530V3.1	Pp3c1_21530V1.1	Pp1s257_72V6.1		Pp1s257_72V2.1	Phypa_170712	Phpat.001G081200	0065007:0009987	0003723:0000166	5737	biological regulation:cellular process	RNA binding:nucleotide binding	cytoplasm	ARATHwo_AT3G16380.1	polyadenylate-binding protein, putative / PABP, putative, similar to polyadenylate-binding protein (poly(A)-binding protein) from {Arabidopsis thaliana} SP:P42731, (Cucumis sativus) GI:7528270, {Homo sapiens} SP:Q13310, {Arabidopsis thaliana} SP:Q05196; contains InterPro entry IPR000504: RNA-binding region RNP-1 (RNA recognition motif) (RRM). Member of the class III family of PABP proteins.	sp|Q1DXH0|PABP_COCIM	Polyadenylate-binding protein, cytoplasmic and nuclear	gi|356552218|ref|XP_003544466.1|	PREDICTED: polyadenylate-binding protein 8-like [Glycine max].	PHYSPtr_m240lflr_YEPO_scaffold-YEPO-2010727-cf._Physcomicromitrium_sp._5	contains EST(s): AU197250(E2058),AU075435(E60706),D46065(S10469),AU031063 (E60706),AU068255(C12673)	contains EST(s): AU197250(E2058),AU075435(E60706),D46065(S10469),AU031063 (E60706),AU068255(C12673)	GO:0000166, GO:0003723	25.1237	30.2125	41.538	33.825	43.502	36.5808	26.3173	21.2403	32.5546	34.9228	28.3422	32.8061	38.9962	42.0615	43.5376	37.4713	35.8565	36.4406
Pp3c1_21540V3.1	Pp3c1_21540V1.1	Pp1s257_73V6.1		Pp1s257_73V2.1	Phypa_147280	Phpat.001G081300											gi|460404279|ref|XP_004247611.1|	PREDICTED: stem-specific protein TSJT1 [Solanum lycopersicum].	PHYSPtr_m240lflr_YEPO_scaffold-YEPO-2014206-cf._Physcomicromitrium_sp._3_rc	F5N5.2; expressed protein [Arabidopsis thaliana]			81.9183	108.674	75.2445	162.358	101.428	127.951	124.526	110.333	132.299	270.571	326.443	143.176	118.027	110.349	96.0716	180.092	101.968	140.413
Pp3c1_21550V3.1	Pp3c1_21550V1.1	Pp1s257_74V6.1		Pp1s257_74V2.1	Phypa_170715	Phpat.001G081400	0000394:0000226:0045492:0015031:0009086:0007264:0007015:0010413:0009832:0009860	0005525:0003924	0030427:0005737:0005730:0005819:0005886	RNA splicing, via endonucleolytic cleavage and ligation:microtubule cytoskeleton organization:xylan biosynthetic process:protein transport:methionine biosynthetic process:small GTPase mediated signal transduction:actin filament organization:glucuronoxylan metabolic process:plant-type cell wall biogenesis:pollen tube growth	GTP binding:GTPase activity	site of polarized growth:cytoplasm:nucleolus:spindle:plasma membrane	ARATHwo_AT4G35020.1	A member of ROP GTPase gene family; Encodes a Rho-like GTP binding protein.	sp|Q6Z7L8|RAC7_ORYSJ	Rac-like GTP-binding protein 7	gi|90101445|sp|Q6EP31.2|RAC5_ORYSJ	RecName: Full=Rac-like GTP-binding protein 5; AltName: Full=GTPase protein RacD; AltName: Full=OsRac5; Flags: Precursor.	PHYSPtr_m240lflr_YEPO_scaffold-YEPO-2000630-cf._Physcomicromitrium_sp._2	af498357_1small g-protein rop3	af498357_1small g-protein rop3	GO:0004767, GO:0005515, GO:0005525, GO:0005622, GO:0007264, GO:0016020	15.4379	22.4347	28.1142	32.6373	26.1538	25.4108	26.5941	23.1132	35.8669	41.2993	39.6937	40.8008	37.1374	36.7113	35.4611	38.4043	38.1679	40.1778
Pp3c1_21570V3.1	Pp3c1_21570V1.1	Pp1s257_78V6.1;Pp1s257_79V6.1;Pp1s257_80V6.1															gi|27263090|emb|CAD35494.1|	putative auxin induced cell wall protein [Pinus pinaster].	CERPUR40tr_m240lflr_isotig10482_2_rc				0.411147	0.389742	0.204653	0.537169	0.120646	0.315712	0.529993	0.459219	0.754836	0.37271	1.05798	0.363421	0.314475	1.04609	1.01381	0.649287	0.406548	0.711864
Pp3c1_21610V3.1	Pp3c1_21610V1.1	Pp1s257_83V6.1		Pp1s257_83V2.1	Phypa_27442	Phpat.001G081700	0010090:0048658:0006355	0043565:0003700:0003682	5634	trichome morphogenesis:anther wall tapetum development:regulation of transcription, DNA-templated	sequence-specific DNA binding:sequence-specific DNA binding transcription factor activity:chromatin binding	nucleus					gi|743940412|ref|XP_011014679.1|	PREDICTED: transcription factor MYB32-like [Populus euphratica].	FUNHY15tr_m240lflr_TR4438_c0_g1_i1_2	MDA7.17; myb family transcription factor	MDA7.17; myb family transcription factor	GO:0003677, GO:0003700, GO:0005634, GO:0045449	0.0222666			0.123639								0.0238994	0.0789623	0.145925	0.0602187		0.0935742	0.0819242
Pp3c1_2161V3.1		Pp1s445_13V6.1																					0.281923	0.227159							0.0799913	0.0724107	0.0795661			0.073904	0.152489	0.0756867		0.138302
Pp3c1_21620V3.1	Pp3c1_21620V1.1	Pp1s257_84V6.1		Pp1s257_84V2.1	Phypa_170717	Phpat.001G081800	6412	0008080:0003735:0003723	5840	translation	N-acetyltransferase activity:structural constituent of ribosome:RNA binding	ribosome					gi|693498708|emb|CEG01355.1|	S15/NS1, RNA-binding [Ostreococcus tauri].	PHYSPtr_onekp_YEPO_76923	structural constituent of	structural constituent of	GO:0003735, GO:0005739, GO:0005840, GO:0006412	14.2496	15.5643	16.1637	13.4883	17.0405	11.5438	16.062	13.6783	13.7539	10.4868	11.2476	14.0374	15.1904	16.2039	14.7374	14.7169	14.4011	14.683
Pp3c1_21630V3.1	Pp3c1_21630V1.1	Pp1s257_85V6.1		Pp1s257_86V2.1	Phypa_147252	Phpat.001G081900	16310	0004674:0000166		phosphorylation	protein serine/threonine kinase activity:nucleotide binding		ARATHwo_AT3G53640.1	Protein kinase superfamily protein; FUNCTIONS IN: protein serine/threonine kinase activity, protein kinase activity, kinase activity, ATP binding; INVOLVED IN: protein amino acid phosphorylation; LOCATED IN: nucleus; CONTAINS InterPro DOMAIN/s: Protein kinase, catalytic domain (InterPro:IPR000719), Serine/threonine-protein kinase domain (InterPro:IPR002290), Serine/threonine-protein kinase-like d…	sp|Q17446|PMK1_CAEEL	Mitogen-activated protein kinase pmk-1	gi|901888785|gb|KMZ99675.1|	mitogen-activated protein kinase 2 [Plasmodium vivax North Korean].	PHYSPtr_m240lflr_YEPO_scaffold-YEPO-2081100-cf._Physcomicromitrium_sp._6_rc	mitogen-activated protein kinase 2	mitogen-activated protein kinase 2	GO:0004672, GO:0005215, GO:0005524, GO:0006468, GO:0006810	21.3472	19.3824	17.7002	17.8617	17.3299	17.7387	15.9014	16.5004	18.7996	17.4391	15.4448	12.318	11.8552	12.9378	11.7727	14.798	12.275	14.2967
Pp3c1_21650V3.1	Pp3c1_21650V1.1	Pp1s257_88V6.1		Pp1s257_88V2.1	Phypa_170719	Phpat.001G082100											gi|302761374|ref|XP_002964109.1|	hypothetical protein SELMODRAFT_438825 [Selaginella moellendorffii].	PHYSPtr_m240lflr_YEPO_scaffold-YEPO-2017945-cf._Physcomicromitrium_sp._1			GO:0009536, GO:0016020	32.4352	35.6724	33.0558	32.7444	46.3532	37.0504	32.1871	41.9559	34.6632	46.5169	37.8059	39.1655	24.2376	25.6578	25.939	38.48	39.6063	35.2886
Pp3c1_21660V3.1	Pp3c1_21660V1.1	Pp1s257_89V6.1				Phpat.001G082200											gi|255584054|ref|XP_002532771.1|	conserved hypothetical protein [Ricinus communis].	FUNHY15tr_m240lflr_TR13288_c0_g4_i1_2				18.6187	16.0152	18.5353	15.2223	15.5556	16.6317	16.288	13.2586	13.2357	12.7888	12.8505	13.8669	21.0018	19.5921	21.8856	19.0574	17.6433	17.8844
Pp3c1_21670V3.1	Pp3c1_21670V1.1					Phpat.001G082300													FUNHY15tr_m240lflr_TR17747_c0_g2_i2_1_rc				14.6333	14.2175	13.6073	10.7832	12.4066	11.4809	11.0199	11.5944	12.948	13.5181	13.9953	14.7921	10.6807	12.2417	12.2181	14.2114	9.46091	10.7829
Pp3c1_21680V3.1	Pp3c1_21680V1.1	Pp1s257_90V6.1		Pp1s257_90V2.1	Phypa_196178	Phpat.001G082400	6414	3746	5739	translational elongation	translation elongation factor activity	mitochondrion			sp|Q1CR51|EFTS_HELPH	Elongation factor Ts	gi|743928013|ref|XP_011008200.1|	PREDICTED: elongation factor Ts, mitochondrial isoform X2 [Populus euphratica].	RACVAtr_onekp_RDOO_117768	elongation factor ts	elongation factor ts	GO:0003746	6.53543	3.81851	6.72183	4.27718	5.67378	5.14195	5.1199	4.50534	6.35184	4.4979	3.77046	5.11568	4.43889	5.11124	5.51724	3.97437	4.19813	3.76402
Pp3c1_21690V3.1	Pp3c1_21690V1.1																gi|12597806|gb|AAG60117.1|AC073555_1	copia-type polyprotein, putative [Arabidopsis thaliana].	MUSBA_ITC1587_BchrUn_random_T36184
Pp3c1_21700V3.1	Pp3c1_21700V1.1																		SOLPEwo_Sopen06g014440.1
Pp3c1_2170V3.1	Pp3c1_2170V1.1	Pp1s346_35V6.1;Pp1s445_15V6.1				Phpat.001G008500	0010248:0009414:0009651:0009926:0048366:0008152:0015992	0046872:0004427:0009678	0005829:0016021:0005739:0009941:0009705:0010008:0005794:0005886	establishment or maintenance of transmembrane electrochemical gradient:response to water deprivation:response to salt stress:auxin polar transport:leaf development:metabolic process:proton transport	metal ion binding:inorganic diphosphatase activity:hydrogen-translocating pyrophosphatase activity	cytosol:integral component of membrane:mitochondrion:chloroplast envelope:plant-type vacuole membrane:endosome membrane:Golgi apparatus:plasma membrane					gi|695028026|ref|XP_009401376.1|	na	PHYSPtr_m240lflr_YEPO_scaffold-YEPO-2006835-cf._Physcomicromitrium_sp._12_rc				77.7474	71.0323	88.7776	92.5274	104.778	105.711	92.5427	61.7367	80.3689	97.399	78.7782	73.5155	113.447	95.8672	106.247	108.389	112.534	94.8799
Pp3c1_21720V3.1	Pp3c1_21720V1.1					Phpat.001G082600											gi|922852425|gb|KOO21116.1|	neutral amino acid transport protein [Chrysochromulina sp. CCMP291].	FUNHY15tr_m240lflr_TR17106_c0_g1_i1_2_rc	amino acid	amino acid	GO:0006865, GO:0015171, GO:0016020	4.43243	2.83542	2.38943	1.05321	0.224098	1.13732	21.156	14.6227	8.32757	4.99995	8.70592	7.00763	8.56725	7.14428	7.45154	7.23622	5.28607	11.2393							2.19146
Pp3c1_21730V3.1	Pp3c1_21730V1.1	Pp1s257_93V6.1		Pp1s257_93V2.1	Phypa_147248	Phpat.001G082700	15031		16021	protein transport		integral component of membrane					gi|658041666|ref|XP_008356443.1|	PREDICTED: secretory carrier-associated membrane protein 4-like isoform X1 [Malus domestica].	PHYSPtr_onekp_YEPO_18168	sc3 protein	sc3 protein	GO:0005886, GO:0015031, GO:0016020, GO:0016021	19.5299	17.0505	18.6755	22.4315	14.0375	18.8925	18.3828	21.4699	22.9032	23.3531	22.5283	19.5421	19.3486	20.7488	19.799	21.8513	17.6208	20.7618
Pp3c1_21740V3.1	Pp3c1_21740V1.1	Pp1s257_95V6.1		Pp1s257_95V2.1	Phypa_46757	Phpat.001G082800	0035434:0034755:0006875:0045037	0015088:0005381:0042803	0016021:0009706	copper ion transmembrane transport:iron ion transmembrane transport:cellular metal ion homeostasis:protein import into chloroplast stroma	copper uptake transmembrane transporter activity:iron ion transmembrane transporter activity:protein homodimerization activity	integral component of membrane:chloroplast inner membrane					gi|703142963|ref|XP_010107889.1|	hypothetical protein L484_027477 [Morus notabilis].	PHYSPtr_m240lflr_YEPO_scaffold-YEPO-2078567-cf._Physcomicromitrium_sp._4_rc	F27O10.6; expressed protein [Arabidopsis thaliana]	F27O10.6; expressed protein [Arabidopsis thaliana]	GO:0009536, GO:0016020	14.4735	12.0097	12.0066	12.5834	11.36	12.9845	15.6104	12.1741	15.2586	10.709	9.93092	13.4825	17.203	15.9074	15.8367	12.2629	14.8433	17.1317
Pp3c1_21760V3.1	Pp3c1_21760V1.1	Pp1s257_96V6.1		Pp1s257_96V2.1	Phypa_60555	Phpat.001G082900	6355	0003700:0043565		regulation of transcription, DNA-templated	sequence-specific DNA binding transcription factor activity:sequence-specific DNA binding						gi|302770248|ref|XP_002968543.1|	hypothetical protein SELMODRAFT_231160 [Selaginella moellendorffii].	PHYSPtr_m240lflr_YEPO_scaffold-YEPO-2004661-cf._Physcomicromitrium_sp._1	bzip transcription factor tga2	bzip transcription factor tga2	GO:0003700, GO:0005634, GO:0005654, GO:0006355, GO:0016020, GO:0043565, GO:0046983	11.2066	14.9437	17.7791	15.171	14.6689	11.9363	15.6637	18.6911	22.5732	25.2392	24.3352	19.4045	18.5897	20.8068	19.7626	21.3833	19.1235	24.3075
Pp3c1_21780V3.1																							3.69006	6.84631	3.05207	1.79735		2.53527	2.00282	0.790215	0.275526	0.249415	0.274061	0.416912	0.688727	0.763674	0.26262			0.238187
Pp3c1_21783V3.1																								0.361968	0.173777				0.092654					0.154296				0.0964829	0.100687	0.176303
Pp3c1_21790V3.1	Pp3c1_21790V1.1	Pp1s257_99V6.1				Phpat.001G083000																	5.02498	5.75365	7.4172	6.21679	5.01338	4.26845	3.61376	6.4565	6.52848	5.16258	4.70239	5.84766	4.25173	5.26904	6.15117	6.53217	4.37164	5.12479
Pp3c1_21800V3.1	Pp3c1_21800V1.1	Pp1s257_100V6.1		Pp1s257_100V2.1	Phypa_147251	Phpat.001G083100	55085	22891	16021	transmembrane transport	substrate-specific transmembrane transporter activity	integral component of membrane			sp|Q96FB5|RRNAD_HUMAN	Protein RRNAD1	gi|922486422|ref|XP_013583637.1|	PREDICTED: methyltransferase-like protein 25 isoform X2 [Brassica oleracea var. oleracea].	FUNHY15tr_m240lflr_TR3933_c0_g1_i3_7_rc				19.841	19.2984	18.8909	17.4406	14.6684	18.624	19.0111	17.9322	15.2271	14.7002	14.6312	12.7491	12.923	14.6989	13.639	14.7195	13.037	12.1463
Pp3c1_21810V3.1	Pp3c1_21810V1.1	Pp1s257_101V6.1				Phpat.001G083200											gi|357146251|ref|XP_003573925.1|	PREDICTED: stress enhanced protein 1, chloroplastic-like [Brachypodium distachyon].	PHYSPtr_m240lflr_YEPO_scaffold-YEPO-2074303-cf._Physcomicromitrium_sp._1	stress enhanced protein 1	stress enhanced protein 1	GO:0009536, GO:0016020	32.6212	23.3132	25.2862	24.2063	25.3917	29.1445	24.0426	24.9433	20.4512	19.0379	26.2669	24.3658	21.6959	18.7001	20.9502	19.2509	25.0341	22.373
Pp3c1_21840V3.1	Pp3c1_21840V1.1	Pp1s257_103V6.1						1901363:0097159			heterocyclic compound binding:organic cyclic compound binding		ARATHwo_AT3G55350.1	PIF / Ping-Pong family of plant transposases; FUNCTIONS IN: molecular_function unknown; INVOLVED IN: N-terminal protein myristoylation; LOCATED IN: cellular_component unknown; EXPRESSED IN: 20 plant structures; EXPRESSED DURING: 11 growth stages; CONTAINS InterPro DOMAIN/s: Putative harbinger transposase-derived nuclease (InterPro:IPR006912); BEST Arabidopsis thaliana protein match is: unknown pr…			gi|685341978|ref|XP_009107601.1|	PREDICTED: uncharacterized protein LOC103833260 [Brassica rapa].	PHYSPtr_m240lflr_YEPO_scaffold-YEPO-2015772-cf._Physcomicromitrium_sp._6_rc				3.97164	2.61693	5.09275	2.97135	3.54122	3.52392	8.01444	4.93351	6.81926	5.21965	6.86157	6.6732	5.28711	5.05971	5.64659	5.13194	4.91359	4.84812
Pp3c1_21850V3.1	Pp3c1_21850V1.1	Pp1s257_104V6.1		Pp1s257_104V2.1	Phypa_170728	Phpat.001G083400	44699			single-organism process			ARATHwo_AT1G51965.1	Encodes ABA Overly-Sensitive5 (ABO5), a pentatricopeptide repeat protein required for cis-splicing of mitochondrial nad2 intron 3. Involved in response to abscisic acid.	sp|Q9ZU27|PPR76_ARATH	Pentatricopeptide repeat-containing protein At1g51965, mitochondrial	gi|823248654|ref|XP_012456984.1|	PREDICTED: pentatricopeptide repeat-containing protein At4g35850, mitochondrial isoform X2 [Gossypium raimondii].	PHYSPtr_m240lflr_YEPO_scaffold-YEPO-2017893-cf._Physcomicromitrium_sp._1	pentatricopeptide repeat-containing	pentatricopeptide repeat-containing	GO:0005739	8.93105	10.9844	11.9724	9.83762	9.90651	10.1334	9.79043	8.52824	11.1251	10.5557	7.70517	8.86898	11.0378	14.504	12.8033	12.4757	8.99149	9.35028
Pp3c1_21860V3.1	Pp3c1_21860V1.1	Pp1s257_105V6.1		Pp1s257_105V2.1	Phypa_147307	Phpat.001G083500	6412	0003735:0003723	0005794:0005618:0022627:0009507	translation	structural constituent of ribosome:RNA binding	Golgi apparatus:cell wall:cytosolic small ribosomal subunit:chloroplast	ARATHwo_AT5G62300.1	Ribosomal protein S10p/S20e family protein; FUNCTIONS IN: structural constituent of ribosome, RNA binding; INVOLVED IN: translation; LOCATED IN: cytosolic small ribosomal subunit, small ribosomal subunit, cell wall; EXPRESSED IN: leaf; CONTAINS InterPro DOMAIN/s: Ribosomal protein S10, conserved site (InterPro:IPR018268), Ribosomal protein S10, eukaryotic/archaeal (InterPro:IPR005729), Ribosomal …	sp|P49200|RS201_ARATH	40S ribosomal protein S20-1	gi|255539715|ref|XP_002510922.1|	40S ribosomal protein S20, putative [Ricinus communis].	FUNHYSPOtr_m240lflr_Fh.sd_6952_C4_1	40s ribosomal protein	40s ribosomal protein	GO:0003723, GO:0003735, GO:0006412, GO:0015935	585.81	489.117	644.639	489.063	516.961	440.195	396.068	455.768	475.188	440.056	479.512	444.873	502.041	481.88	475.712	472.039	432.007	468.867
Pp3c1_21890V3.1	Pp3c1_21890V1.1	Pp1s257_108V6.1		Pp1s257_108V2.1	Phypa_223402	Phpat.001G083600	71918	0015204:0015293	0005886:0016021	urea transmembrane transport	urea transmembrane transporter activity:symporter activity	plasma membrane:integral component of membrane			sp|P33413|DUR3_YEAST	Urea active transporter	gi|697132928|ref|XP_009620516.1|	PREDICTED: urea-proton symporter DUR3 [Nicotiana tomentosiformis].	PHYSPtr_m240lflr_YEPO_scaffold-YEPO-2005067-cf._Physcomicromitrium_sp._15_rc	urea transporter	urea transporter	GO:0005215, GO:0006814, GO:0016020, GO:0016021, GO:0055085	0.873447	1.35957	0.850175	0.461902	0.551717	0.363463	2.71976	2.32309	2.73575	2.34538	2.52912	2.32548	2.22587	2.57216	2.85303	2.49717	1.1282	3.13016
Pp3c1_21900V3.1	Pp3c1_21900V1.1
Pp3c1_21910V3.1	Pp3c1_21910V1.1
Pp3c1_21920V3.1	Pp3c1_21920V1.1	Pp1s257_111V6.1	Pp1s257_112V6.1	Pp1s257_111V2.1	Phypa_94283	Phpat.001G083700	9987			cellular process							gi|769800734|ref|XP_011626710.1|	PREDICTED: ninja-family protein Os05g0558800 isoform X2 [Amborella trichopoda].	FUNHY15tr_m240lflr_TR35223_c0_g2_i1_7	Spidroin 1 (Dragline silk fibroin 1) [Nephila clavipes]			1.23565	1.5342	1.58385	1.84345	2.15208	1.8709	1.40059	1.2858	2.67481	2.38029	1.74366	1.94366	2.34205	1.41015	2.4487	1.52996	2.41732	1.88122
Pp3c1_21950V3.1	Pp3c1_21950V1.1	Pp1s257_115V6.1;Pp1s7016_1V6.1		Pp1s7016_1V2.1	Phypa_158251	Phpat.001G083800	0030163:0006508	0008233:0005524	0005737:0000502	protein catabolic process:proteolysis	peptidase activity:ATP binding	cytoplasm:proteasome complex					gi|586680308|ref|XP_006840553.1|	PREDICTED: 26S protease regulatory subunit 8 homolog A [Amborella trichopoda].	RACVAtr_onekp_RDOO_4021	:26s protease regulatory	:26s protease regulatory	GO:0005524, GO:0005737, GO:0008233, GO:0008568, GO:0030163	29.4872	34.2358	33.2506	38.3858	33.419	36.4286	39.1398	30.659	33.2236	28.8699	31.4284	34.3355	37.4445	38.3212	43.2853	37.958	36.6031	39.2071
Pp3c1_21960V3.1	Pp3c1_21960V1.1		Pp1s257_112V6.1																FUNHY15tr_m240lflr_TR25355_c0_g1_i1_12_rc
Pp3c1_21970V3.1	Pp3c1_21970V1.1		Pp1s257_112V6.1			Phpat.001G083900													PHYSPtr_onekp_YEPO_72471
Pp3c1_21980V3.1	Pp3c1_21980V1.1		Pp1s257_112V6.1																	Spidroin 1 (Dragline silk fibroin 1) [Nephila clavipes]
Pp3c1_22040V3.1	Pp3c1_22040V1.1	Pp1s59_369V6.1		Pp1s59_369V2.1	Phypa_163763	Phpat.001G084100	6397	3723	0005737:0005634	mRNA processing	RNA binding	cytoplasm:nucleus	ARATHwo_AT2G02570.1	nucleic acid binding;RNA binding; FUNCTIONS IN: RNA binding, nucleic acid binding; INVOLVED IN: mRNA processing; LOCATED IN: nucleus, cytoplasm; EXPRESSED IN: 24 plant structures; EXPRESSED DURING: 14 growth stages; CONTAINS InterPro DOMAIN/s: Tudor subgroup (InterPro:IPR018351), Tudor domain (InterPro:IPR002999), Survival motor neuron (InterPro:IPR010304); Has 339 Blast hits to 339 proteins in 1…	sp|Q6DEY1|SPF30_XENTR	Survival of motor neuron-related-splicing factor 30	gi|586670708|ref|XP_006836901.1|	PREDICTED: survival of motor neuron-related-splicing factor 30 isoform X1 [Amborella trichopoda].	PHYSPtr_onekp_YEPO_11201	nucleic acid binding protein	nucleic acid binding protein	GO:0003676	27.1769	25.1376	19.5711	17.0849	15.5794	18.2727	31.6621	33.9934	32.8224	30.0171	26.6103	23.8121	20.6363	26.0321	19.1424	23.5402	17.3886	21.6695
Pp3c1_22060V3.1	Pp3c1_22060V1.1	Pp1s59_365V6.1;Pp1s59_367V6.1		Pp1s59_365V2.1	Phypa_76613												gi|669153066|ref|XP_008612095.1|	hypothetical protein SDRG_08006 [Saprolegnia diclina VS20].	SCHFAtr_onekp_IGUH_19051	leucine rich repeat containing 9	leucine rich repeat containing 9	GO:0005515	0.172103	0.0433349	0.0260058		0.0134145	0.012765	0.0277314	0.0437658	0.137339	0.0966962	0.0455363	0.092362		0.0140986	0.0145451	0.0144387	0.0452035
Pp3c1_22066V3.1		Pp1s59_365V6.1;Pp1s59_367V6.1															gi|302823684|ref|XP_002993492.1|	hypothetical protein SELMODRAFT_431559 [Selaginella moellendorffii].	RACVAtr_onekp_RDOO_13614				1.34012	1.25276	0.882756	0.423306	0.340262	0.676141	2.23437	1.93728	1.4572	1.25728	0.883263	1.11971	0.730407	0.841444	0.683624	0.700165	0.281029	0.91527
Pp3c1_22069V3.1		Pp1s59_367V6.1																					3.05655	5.04289	3.37819	2.18212	2.46864	2.24547	3.48978	4.10601	4.04716	2.87856	3.94349	3.5619	1.78933	3.16685	2.51925	2.65711	1.59034	2.21346
Pp3c1_22090V3.1	Pp3c1_22090V1.1	Pp1s59_361V6.1;Pp1s59_362V6.1		Pp1s59_361V2.1	Phypa_182795	Phpat.001G084600							ARATHwo_AT4G03020.1	transducin family protein / WD-40 repeat family protein; CONTAINS InterPro DOMAIN/s: WD40 repeat 2 (InterPro:IPR019782), WD40 repeat (InterPro:IPR001680), WD repeat protein 23 (InterPro:IPR017399), G-protein beta WD-40 repeat, region (InterPro:IPR020472), WD40 repeat-like-containing domain (InterPro:IPR011046), WD40-repeat-containing domain (InterPro:IPR017986), WD40/YVTN repeat-like-containing d…	sp|Q40153|LE14B_LITER	LEC14B protein	gi|719973079|ref|XP_010279357.1|	PREDICTED: LEC14B homolog [Nelumbo nucifera].	FUNHY15tr_m240lflr_TR7256_c1_g3_i1_4	wd-repeat protein	:wd-repeat protein	GO:0005739	14.3623	15.2992	12.6922	17.5921	10.7758	17.0786	11.625	11.5811	16.5434	15.3673	15.8612	16.4598	11.3468	13.4952	11.3698	14.1911	13.1007	12.1286
Pp3c1_22100V3.1	Pp3c1_22100V1.1	Pp1s59_359V6.1		Pp1s59_359V2.1	Phypa_182792	Phpat.001G084700	0006950:0006468	0004672:0005524		response to stress:protein phosphorylation	protein kinase activity:ATP binding						gi|297743103|emb|CBI35970.3|	unnamed protein product, partial [Vitis vinifera].	FUNHY15tr_m240lflr_TR19252_c0_g2_i1_5	atp binding	atp binding	GO:0004713, GO:0005524, GO:0005739, GO:0006468	4.77643	5.01006	5.61086	4.00411	4.0497	3.88563	3.73369	6.4171	5.48731	4.26263	4.09995	4.21915	5.31649	6.73212	5.74115	6.33909	6.19949	5.15186
Pp3c1_2210V3.1	Pp3c1_2210V1.1	Pp1s346_35V6.1;Pp1s445_19V6.1		Pp1s445_19V2.1	Phypa_173344	Phpat.001G008600	0055085:0015992:0055114	0009678:0004427:0032440	16020	transmembrane transport:proton transport:oxidation-reduction process	hydrogen-translocating pyrophosphatase activity:inorganic diphosphatase activity:2-alkenal reductase [NAD(P)] activity	membrane			sp|Q8RCX1|HPPA_CALS4	K(+)-insensitive pyrophosphate-energized proton pump	gi|566168857|ref|XP_006382405.1|	inorganic pyrophosphatase family protein [Populus trichocarpa].	PHYSPtr_m240lflr_YEPO_scaffold-YEPO-2006836-cf._Physcomicromitrium_sp._13_rc	vacuolar h+-translocating inorganic pyrophosphatase	vacuolar h+-translocating inorganic pyrophosphatase	GO:0004427, GO:0005739, GO:0005886, GO:0009414, GO:0009507, GO:0009536, GO:0009651, GO:0009678, GO:0009705, GO:0009926, GO:0010008, GO:0010248, GO:0015992, GO:0016020, GO:0016887	34.9927	35.4046	42.5634	49.3131	61.6847	58.3541	40.4774	28.5424	40.52	52.509	41.5513	38.7247	64.717	48.2763	57.7765	53.4848	62.2267	53.236
Pp3c1_22110V3.1	Pp3c1_22110V1.1	Pp1s59_357V6.1
Pp3c1_22120V3.1	Pp3c1_22120V1.1	Pp1s59_356V6.1		Pp1s59_356V2.1	Phypa_163760	Phpat.001G084800	0006879:0006826:0055114	0008199:0004322		cellular iron ion homeostasis:iron ion transport:oxidation-reduction process	ferric iron binding:ferroxidase activity				sp|P19133|FRIL_PIG	Ferritin light chain	gi|672136920|ref|XP_008792167.1|	PREDICTED: ferritin-3, chloroplastic-like [Phoenix dactylifera].	FUNHY15tr_m240lflr_TR25352_c0_g2_i1_1	iron-binding protein	iron-binding protein	GO:0006826, GO:0006879, GO:0008199, GO:0009536, GO:0016491, GO:0055114	92.8271	127.3	67.4051	141.403	82.2726	115.693	71.145	91.1388	67.8135	80.3112	90.0122	95.9975	64.2728	55.2013	54.1513	47.4974	96.076	84.7002
Pp3c1_22130V3.1	Pp3c1_22130V1.1	Pp1s59_355V6.1		Pp1s59_355V2.1	Phypa_17855	Phpat.001G084900		5524			ATP binding		ARATHwo_AT4G05380.1	P-loop containing nucleoside triphosphate hydrolases superfamily protein; FUNCTIONS IN: nucleoside-triphosphatase activity, ATPase activity, nucleotide binding, ATP binding; INVOLVED IN: biological_process unknown; LOCATED IN: cellular_component unknown; CONTAINS InterPro DOMAIN/s: ATPase, AAA-type, core (InterPro:IPR003959), ATPase, AAA+ type, core (InterPro:IPR003593), ATPase, AAA-type, conserv…	sp|Q9CZP5|BCS1_MOUSE	Mitochondrial chaperone BCS1	gi|702299127|ref|XP_010048617.1|	PREDICTED: probable mitochondrial chaperone BCS1-B [Eucalyptus grandis].	PHYSPtr_m240lflr_YEPO_scaffold-YEPO-2017300-cf._Physcomicromitrium_sp._3	atp binding	atp binding	GO:0005524, GO:0016020, GO:0017111	4.31601	4.17255	3.80398	3.07249	4.42845	3.04917	4.01918	4.8552	3.1127	2.89186	3.13689	2.8043	3.68562	4.01101	3.45488	4.22402	4.28676	2.65546
Pp3c1_22150V3.1	Pp3c1_22150V1.1	Pp1s59_354V6.1				Phpat.001G085000	0000959:0006396:0071840:0034470:0044699:0006402:0090503	0003723:0004654:0000175		mitochondrial RNA metabolic process:RNA processing:cellular component organization or biogenesis:ncRNA processing:single-organism process:mRNA catabolic process:RNA phosphodiester bond hydrolysis, exonucleolytic	RNA binding:polyribonucleotide nucleotidyltransferase activity:3'-5'-exoribonuclease activity				sp|Q74CS9|PNP_GEOSL	Polyribonucleotide nucleotidyltransferase	gi|694404646|ref|XP_009377194.1|	PREDICTED: polyribonucleotide nucleotidyltransferase 2, mitochondrial [Pyrus x bretschneideri].	FUNHY15tr_m240lflr_TR11259_c0_g1_i1_2				1.69578	2.51171	2.23081	1.69244	2.50877	1.42054	1.07155	1.24016	1.88687	1.40914	1.14956	1.606	1.51323	2.00477	1.93338	1.76301	1.21103	1.32532
Pp3c1_22160V3.1	Pp3c1_22160V1.1																gi|670434688|ref|XP_008657885.1|	PREDICTED: pyrophosphate-energized vacuolar membrane proton pump-like [Zea mays].	PICABHC_MA_122492g0010.1							0.338928						0.470325						0.737405
Pp3c1_22180V3.1	Pp3c1_22180V1.1	Pp1s59_351V6.1		Pp1s59_351V2.1	Phypa_182782			0046872:0003723			metal ion binding:RNA binding		ARATHwo_AT3G12130.1	KH domain-containing protein / zinc finger (CCCH type) family protein; CONTAINS InterPro DOMAIN/s: Zinc finger, CCCH-type (InterPro:IPR000571), K Homology (InterPro:IPR004087), K Homology, type 1, subgroup (InterPro:IPR018111), K Homology, type 1 (InterPro:IPR004088); BEST Arabidopsis thaliana protein match is: KH domain-containing protein / zinc finger (CCCH type) family protein (TAIR:AT5G06770.…	sp|Q69XQ3|C3H44_ORYSJ	Zinc finger CCCH domain-containing protein 44	gi|568879865|ref|XP_006492866.1|	PREDICTED: zinc finger CCCH domain-containing protein 14-like isoform X1 [Citrus sinensis].	PHYSPtr_m240lflr_YEPO_scaffold-YEPO-2080407-cf._Physcomicromitrium_sp._3	zinc finger c-x8-c-x5-c-x3-h type family protein	zinc finger c-x8-c-x5-c-x3-h type family protein	GO:0003723, GO:0004518, GO:0005634, GO:0008270	6.60108	5.46078	6.96379	3.29908	5.34169	4.9061	4.33322	5.55184	4.32664	4.24735	5.24087	4.48096	5.06313	4.99228	4.25228	3.74811	4.2532	5.03694
Pp3c1_22185V3.1		Pp1s59_351V6.1						0046872:0003723			metal ion binding:RNA binding				sp|Q7XPK1|C3H31_ORYSJ	Zinc finger CCCH domain-containing protein 31	gi|734414436|gb|KHN37267.1|	Zinc finger CCCH domain-containing protein 14 [Glycine soja].	PHYSPtr_m240lflr_YEPO_scaffold-YEPO-2080407-cf._Physcomicromitrium_sp._3				0.176338	0.697734	0.350201	0.279757	0.267038	0.17937	0.55204	0.392907	0.393118	0.420566	0.391028	0.405577	0.312668	0.115564	0.272513	0.507222	0.335239	0.47887
Pp3c1_22200V3.1	Pp3c1_22200V1.1	Pp1s59_349V6.1		Pp1s59_349V2.1	Phypa_163758	Phpat.001G085300	0016075:0090502:0006396	0003723:0004525		rRNA catabolic process:RNA phosphodiester bond hydrolysis, endonucleolytic:RNA processing	RNA binding:ribonuclease III activity								SCOAQtr_onekp_BPSG_89614	ribonuclease iii	ribonuclease iii	GO:0003725, GO:0004525, GO:0005622, GO:0006396, GO:0008168, GO:0009536, GO:0032259	5.46621	6.01233	6.29314	4.38419	5.08568	5.56019	7.06863	6.44867	7.16392	7.19814	7.02788	5.04753	5.92815	6.25482	6.47639	6.38241	5.29924	5.74615
Pp3c1_2220V3.1	Pp3c1_2220V1.1	Pp1s346_33V6.1		Pp1s346_33V2.1	Phypa_198957	Phpat.001G008700	0008152:0015992:0055085	0004427:0009678	16020	metabolic process:proton transport:transmembrane transport	inorganic diphosphatase activity:hydrogen-translocating pyrophosphatase activity	membrane					gi|743808292|ref|XP_010928300.1|	PREDICTED: pyrophosphate-energized vacuolar membrane proton pump [Elaeis guineensis].	PHYSPtr_m240lflr_YEPO_scaffold-YEPO-2006833-cf._Physcomicromitrium_sp._14_rc	vacuolar h+-translocating inorganic pyrophosphatase	vacuolar h+-translocating inorganic pyrophosphatase	GO:0004427, GO:0005739, GO:0005886, GO:0009414, GO:0009507, GO:0009651, GO:0009678, GO:0009705, GO:0009926, GO:0010008, GO:0010248, GO:0015992, GO:0016020, GO:0016887, GO:0032440, GO:0055114	18.5364	19.9953	22.3288	30.8961	38.9353	33.8227	18.2154	13.3668	20.6642	26.8923	18.3592	22.4644	27.1064	24.9517	26.9041	27.5541	34.8044	26.042
Pp3c1_22210V3.1	Pp3c1_22210V1.1	Pp1s59_348V6.1				Phpat.001G085400	0031047:0090304:0050896:0043966:0040029	0046872:0008080		gene silencing by RNA:nucleic acid metabolic process:response to stimulus:histone H3 acetylation:regulation of gene expression, epigenetic	metal ion binding:N-acetyltransferase activity						gi|595895980|ref|XP_007213733.1|	hypothetical protein PRUPE_ppa000177mg [Prunus persica].	FUNHY15tr_m240lflr_TR46836_c0_g1_i3_6	PREDICTED: hypothetical protein [Vitis vinifera]	PREDICTED: hypothetical protein [Vitis vinifera]	GO:0005515, GO:0005634, GO:0006355, GO:0008080, GO:0008270	7.40289	8.1689	7.86721	6.83592	6.54373	7.53017	8.45216	8.91487	8.45952	8.70255	8.23087	7.71873	7.47182	8.16762	7.37026	7.52381	7.88584	7.36298
Pp3c1_22220V3.1	Pp3c1_22220V1.1	Pp1s59_347V6.1																	PHYSPtr_m240lflr_YEPO_scaffold-YEPO-2014795-cf._Physcomicromitrium_sp._7_rc				0.383623	0.973673	0.296794	0.170411	0.0191368	0.327784	2.86817	2.08117	1.69801	1.43856	1.08268	0.9388	0.616721	0.724058	0.560243	1.17408	0.343927	1.59964
Pp3c1_22230V3.1	Pp3c1_22230V1.1	Pp1s59_346V6.1		Pp1s59_346V2.1	Phypa_182780	Phpat.001G085500		16740			transferase activity						gi|727563223|ref|XP_010453908.1|	PREDICTED: protein SET DOMAIN GROUP 40-like [Camelina sativa].	PHYSPtr_m240lflr_YEPO_scaffold-YEPO-2008785-cf._Physcomicromitrium_sp._4	MKP11.9; SET-domain transcriptional regulator family [Arabidopsis thaliana]	:MKP11.9; SET-domain transcriptional regulator family [Arabidopsis thaliana]	GO:0008270, GO:0016568	5.44823	7.23141	6.48395	3.41999	5.60946	4.91182	4.16485	4.49655	5.66212	4.44755	4.85724	3.1052	4.39333	5.09284	5.71102	4.76215	3.99348	4.14375
Pp3c1_22240V3.1	Pp3c1_22240V1.1	Pp1s59_345V6.1		Pp1s59_345V2.1	Phypa_126447	Phpat.001G085600	0033358:0006012:0045227	0050373:0003978:0050662	0016021:0032580:0005739	UDP-L-arabinose biosynthetic process:galactose metabolic process:capsule polysaccharide biosynthetic process	UDP-arabinose 4-epimerase activity:UDP-glucose 4-epimerase activity:coenzyme binding	integral component of membrane:Golgi cisterna membrane:mitochondrion					gi|326532196|dbj|BAK01474.1|	predicted protein [Hordeum vulgare subsp. vulgare].	FUNHY15tr_m240lflr_TR13861_c0_g1_i3_2	udp-glucose 4-epimerase	udp-glucose 4-epimerase	GO:0003978, GO:0005739, GO:0005794, GO:0006012, GO:0009225, GO:0009832, GO:0012505, GO:0016020, GO:0019567, GO:0050373, GO:0050662	9.62814	11.5547	14.5721	8.60494	11.4506	8.36215	8.85802	8.53002	10.9053	10.6446	9.01205	9.66747	12.1843	11.3984	12.0219	10.2924	8.70147	10.1654
Pp3c1_22260V3.1	Pp3c1_22260V1.1	Pp1s59_343V6.1		Pp1s59_343V2.1	Phypa_163753	Phpat.001G085700											gi|590685267|ref|XP_007042056.1|	RNA-binding CRS1 / YhbY domain protein, putative [Theobroma cacao].	FUNHY15tr_m240lflr_TR37796_c0_g2_i1_1	cation antiporter	cation antiporter	GO:0003723, GO:0009536	3.90335	3.19584	6.02757	2.51699	4.77371	3.19772	3.05145	2.22005	3.14392	2.29618	2.16772	4.00039	4.37592	3.79587	5.8571	4.4959	4.0921	3.45909
Pp3c1_22270V3.1	Pp3c1_22270V1.1	Pp1s59_342V6.1																					1.36848	0.413494	0.661713	0.379937	0.170665	0.162401	0.882027	0.556806	0.970713	0.702977	1.15866	0.734418	0.64706	1.07621	0.555147	0.734781	0.191699	0.671331
Pp3c1_22290V3.1	Pp3c1_22290V1.1																gi|702283547|ref|XP_010045978.1|	PREDICTED: probable LRR receptor-like serine/threonine-protein kinase At1g56140 [Eucalyptus grandis].	CERPUtr_onekp_FFPD_53859							0.264263			0.368093	0.516378	0.135035	0.855665	0.134317	0.306492	0.112515		0.12871	0.255536		0.116735
Pp3c1_22300V3.1	Pp3c1_22300V1.1	Pp1s59_339V6.1				Phpat.001G085900									sp|Q9CZ49|KLH35_MOUSE	Kelch-like protein 35	gi|115450969|ref|NP_001049085.1|	Os03g0167800 [Oryza sativa Japonica Group].	PHYSPtr_m240lflr_YEPO_scaffold-YEPO-2004787-cf._Physcomicromitrium_sp._2				21.1478	20.2904	19.2553	16.5572	16.6626	17.0697	28.1219	30.3242	23.96	25.9521	24.7164	23.6845	20.0135	25.0918	21.1157	24.5201	17.2247	24.323
Pp3c1_22321V3.1																							1.82306	2.52165	1.38104	1.03478	1.39445	1.61539	8.71077	8.60445	3.51739	4.05811	5.04224	3.80913	3.04572	2.96298	3.2869	3.32811	3.40503	4.3226
Pp3c1_22360V3.1	Pp3c1_22360V1.1	Pp1s59_338V6.1		Pp1s59_338V2.1	Phypa_163751	Phpat.001G086300											gi|302849965|ref|XP_002956511.1|	hypothetical protein VOLCADRAFT_97465 [Volvox carteri f. nagariensis].	PHYSPtr_onekp_YEPO_80108	Immediate-early protein RSP40 [Suid herpesvirus 1 strain Kaplan]	Immediate-early protein RSP40 [Suid herpesvirus 1 strain Kaplan]	GO:0009536	20.9308	23.836	24.9099	20.7004	30.8728	19.3927	20.6168	23.735	19.5329	22.1767	25.1858	24.2322	18.6317	18.0161	19.5583	18.6062	23.9303	20.8941
Pp3c1_22410V3.1	Pp3c1_22410V1.1	Pp1s59_333V6.1		Pp1s59_333V2.1	Phypa_163750		0044763:0044260:0044262:0006139:0044723			single-organism cellular process:cellular macromolecule metabolic process:cellular carbohydrate metabolic process:nucleobase-containing compound metabolic process:single-organism carbohydrate metabolic process							gi|645280037|ref|XP_008245005.1|	PREDICTED: uncharacterized protein LOC103343107 [Prunus mume].	FUNHY15tr_m240lflr_TR20767_c0_g1_i1_13_rc	T24C20.80; expressed protein [Arabidopsis thaliana]	T24C20.80; expressed protein [Arabidopsis thaliana]	GO:0005886, GO:0016020	1.86622	2.188	1.96516	1.16039	1.49098	1.30632	1.58812	1.86865	2.40969	2.4341	2.49975	1.97178	1.61142	1.83456	1.34063	1.44825	1.67474	1.28743
Pp3c1_22440V3.1	Pp3c1_22440V1.1	Pp1s59_329V6.1;Pp1s59_330V6.1					0048869:0016049:0071555:0006464:0060560:0009637:0071669:0007165:0044707:0009605		16020	cellular developmental process:cell growth:cell wall organization:cellular protein modification process:developmental growth involved in morphogenesis:response to blue light:plant-type cell wall organization or biogenesis:signal transduction:single-multicellular organism process:response to external stimulus		membrane					gi|802577797|ref|XP_012069184.1|	PREDICTED: root phototropism protein 3 [Jatropha curcas].	CERPUGG1tr_m240lflr_isotig14332_14_rc	transposon protein mutator sub-class	transposon protein mutator sub-class	GO:0004871, GO:0005515, GO:0009638, GO:0009785	0.0711196	0.0358152	0.128959	0.164543	0.195127	0.0928394	0.275032	0.472638	0.43385	0.548002	0.772764	0.396941	0.353089	0.447442	0.259657	0.410503	0.34869	0.218055
Pp3c1_22450V3.1	Pp3c1_22450V1.1	Pp1s59_328V6.1		Pp1s59_328V2.1	Phypa_163749	Phpat.001G086700	0045893:0009773:0009965:0030154	5506	9535	positive regulation of transcription, DNA-templated:photosynthetic electron transport in photosystem I:leaf morphogenesis:cell differentiation	iron ion binding	chloroplast thylakoid membrane					gi|659071594|ref|XP_008460788.1|	PREDICTED: LOW QUALITY PROTEIN: uncharacterized protein LOC103499548 [Cucumis melo].	PHYSPtr_onekp_YEPO_76645	rubredoxin	rubredoxin	GO:0009055, GO:0009535, GO:0009536, GO:0009579, GO:0016020, GO:0046872	60.116	37.7965	41.3604	47.3273	62.0011	53.6533	44.9161	56.5565	26.8776	31.6892	34.4467	49.3443	37.8604	28.0448	37.6219	33.1673	60.456	39.9305
Pp3c1_22470V3.1	Pp3c1_22470V1.1	Pp1s59_326V6.1		Pp1s59_326V2.1	Phypa_182773	Phpat.001G086900	0001666:0010498:0007010:0006094	0030976:0000287:0004737	5829	response to hypoxia:proteasomal protein catabolic process:cytoskeleton organization:gluconeogenesis	thiamine pyrophosphate binding:magnesium ion binding:pyruvate decarboxylase activity	cytosol			sp|Q0CNV1|PDC_ASPTN	Pyruvate decarboxylase	gi|595835806|ref|XP_007207128.1|	hypothetical protein PRUPE_ppa003096mg [Prunus persica].	PHYSPtr_m240lflr_YEPO_scaffold-YEPO-2012347-cf._Physcomicromitrium_sp._5_rc	pyruvate decarboxylase	pyruvate decarboxylase	GO:0000287, GO:0004737, GO:0006950, GO:0016020, GO:0016740, GO:0030976	4.5682	4.34469	3.92249	7.70159	3.41189	4.04703	6.01991	5.35003	9.65799	7.68052	7.43392	6.76068	5.80609	6.3712	5.36851	7.00315	4.42063	6.14872
Pp3c1_22480V3.1	Pp3c1_22480V1.1	Pp1s59_325V6.1		Pp1s59_325V2.1	Phypa_126277	Phpat.001G087000	0000165:0006468	0004707:0005524		MAPK cascade:protein phosphorylation	MAP kinase activity:ATP binding		ARATHwo_AT3G01090.2	encodes a SNF1-related protein kinase that physically interacts with SCF subunit SKP1/ASK1 and 20S proteosome subunit PAD1. It can also interact with PRL1 DWD-containing protein. Based on in vitro degradation assays and cul4cs and prl1 mutants, there is evidence that AKIN10 is degraded in a proteasome-dependent manner, and that this depends on a CUL4-PRL1 E3 ligase	sp|Q54BF0|FHKA_DICDI	Probable serine/threonine-protein kinase fhkA	gi|363808060|ref|NP_001242213.1|	uncharacterized protein LOC100815697 [Glycine max].	PHYSPtr_onekp_YEPO_17040	mitogen-activated protein kinase 4	mitogen-activated protein kinase 4	GO:0004707, GO:0005524, GO:0006468	18.8289	17.3938	21.4091	17.8643	19.1701	18.9257	17.2806	17.9287	21.711	18.0865	18.0322	20.5189	27.8065	27.1449	26.0796	20.8839	23.0997	25.129
Pp3c1_22490V3.1	Pp3c1_22490V1.1	Pp1s59_322V6.1		Pp1s59_322V2.1:Pp1s59_323V2.1	Phypa_126526:Phypa_76587	Phpat.001G087100											gi|351721557|ref|NP_001237981.1|	uncharacterized protein LOC100306639 [Glycine max].	PHYSPtr_m240lflr_YEPO_scaffold-YEPO-2080716-cf._Physcomicromitrium_sp._2	Transcription termination factor rho (ATP-dependent helicase rho) [Micrococcus luteus]			22.5282	24.7275	20.5416	18.5851	22.0634	22.0863	30.0833	27.5861	23.8723	29.0022	25.7955	20.1338	21.3041	20.4647	21.4113	21.7483	18.5484	21.4491
Pp3c1_22500V3.1	Pp3c1_22500V1.1	Pp1s59_321V6.1		Pp1s59_321V2.1	Phypa_163747	Phpat.001G087200	0045980:0043086	4857	5739	negative regulation of nucleotide metabolic process:negative regulation of catalytic activity	enzyme inhibitor activity	mitochondrion					gi|657953071|ref|XP_008360853.1|	PREDICTED: uncharacterized protein At2g27730, mitochondrial-like [Malus domestica].	PHYSPtr_onekp_YEPO_4513	Unknown mitochondrial protein At2g27730 [Arabidopsis thaliana]	Unknown mitochondrial protein At2g27730 [Arabidopsis thaliana]	GO:0005739, GO:0016020	44.1773	43.9553	45.6358	44.3217	30.0931	36.2616	50.7347	40.171	47.5746	52.7795	62.1982	49.3567	53.3682	60.8866	57.2937	53.4153	43.5066	49.87
Pp3c1_22510V3.1	Pp3c1_22510V1.1	Pp1s59_320V6.1		Pp1s59_320V2.1	Phypa_126361	Phpat.001G087300	0090502:0044699	0003723:0033897		RNA phosphodiester bond hydrolysis, endonucleolytic:single-organism process	RNA binding:ribonuclease T2 activity						gi|565377258|ref|XP_006355103.1|	PREDICTED: intracellular ribonuclease LX-like [Solanum tuberosum].	PHYSPtr_m240lflr_YEPO_scaffold-YEPO-2078260-cf._Physcomicromitrium_sp._3_rc	s-like rnase	s-like rnase	GO:0003723, GO:0016020, GO:0033897	45.471	44.0308	42.907	44.7189	42.3853	44.659	43.3869	42.2661	42.0335	39.6692	43.4345	40.5388	51.4498	58.8089	59.4855	52.9796	46.6878	49.4804
Pp3c1_22520V3.1	Pp3c1_22520V1.1	Pp1s59_319V6.1		Pp1s59_319V2.1	Phypa_18830	Phpat.001G087400	0016556:0010027			mRNA modification:thylakoid membrane organization							gi|590630026|ref|XP_007027154.1|	Uncharacterized protein TCM_022040 [Theobroma cacao].	FUNHY15tr_m240lflr_TR50378_c0_g1_i1_1	uncharacterised protein family containing expressed	uncharacterised protein family containing expressed	GO:0005739	5.17655	4.63443	7.25092	3.87812	5.37978	4.19294	6.19624	5.68347	5.945	4.53743	5.33365	7.01133	7.13892	4.79255	8.55536	6.45229	5.06447	6.24783
Pp3c1_22530V3.1	Pp3c1_22530V1.1	Pp1s59_318V6.1																	ROSCAtr_onekp_XWHK_1222			GO:0016020	1.49822		0.603706	0.154058		0.790213		1.58043	0.708494	0.641352	1.17455	0.536029	0.196779		0.450206	0.223456	0.233193
Pp3c1_22540V3.1	Pp3c1_22540V1.1	Pp1s59_317V6.1		Pp1s59_317V2.1	Phypa_182770	Phpat.001G087500	8152	0003723:0005524:0004386		metabolic process	RNA binding:ATP binding:helicase activity		ARATHwo_AT2G40700.1	P-loop containing nucleoside triphosphate hydrolases superfamily protein; FUNCTIONS IN: helicase activity, ATP binding, ATP-dependent helicase activity, nucleic acid binding; EXPRESSED IN: 23 plant structures; EXPRESSED DURING: 13 growth stages; CONTAINS InterPro DOMAIN/s: RNA helicase, DEAD-box type, Q motif (InterPro:IPR014014), DNA/RNA helicase, DEAD/DEAH box type, N-terminal (InterPro:IPR0115…	sp|Q0DLB9|RH17_ORYSJ	DEAD-box ATP-dependent RNA helicase 17	gi|302845521|ref|XP_002954299.1|	hypothetical protein VOLCADRAFT_76220 [Volvox carteri f. nagariensis].	FUNHY15tr_m240lflr_TR39226_c0_g1_i1_6_rc	rna helicase	rna helicase	GO:0003676, GO:0005524, GO:0008026, GO:0016853	9.06615	14.5912	13.1709	10.3179	12.3722	9.6657	5.59383	5.21542	6.51618	6.92749	6.29312	6.39178	8.52299	7.15786	7.27622	6.63152	7.4629	7.1069
Pp3c1_22560V3.1	Pp3c1_22560V1.1	Pp1s59_314V6.1		Pp1s59_314V2.1	Phypa_182769	Phpat.001G087600	6468	0004672:0005524		protein phosphorylation	protein kinase activity:ATP binding		ARATHwo_AT3G49670.1	Encodes a CLAVATA1-related receptor kinase-like protein required for both shoot and flower meristem function. Very similar to BAM1,with more than 85% a.a. identity. It has a broad expression pattern and is involved in vascular strand development in the leaf, control of leaf shape, size and symmetry, male gametophyte development and ovule specification and function. Anthers of double mutants (bam1…	sp|Q9M2Z1|BAME2_ARATH	Leucine-rich repeat receptor-like serine/threonine-protein kinase BAM2	gi|802546726|ref|XP_012086644.1|	PREDICTED: probable leucine-rich repeat receptor-like protein kinase IMK3 [Jatropha curcas].	PHYSPtr_m240lflr_YEPO_scaffold-YEPO-2082092-cf._Physcomicromitrium_sp._1	receptor protein kinase clavata1	receptor protein kinase clavata1	GO:0004672, GO:0005515, GO:0005524, GO:0006468, GO:0016020, GO:0016491	0.160093	0.52404	0.377379	0.111118	0.179689	0.151989	0.206369	0.27141	0.261187	0.195316	0.225912	0.163241	0.189242	0.409179	0.508731	0.333091	0.0112131	0.314145
Pp3c1_22570V3.1		Pp1s59_312V6.1				Phpat.001G087700											gi|913611069|gb|AKU93601.1|	hypothetical protein AKJ09_00265 [Labilithrix luteola].	FUNHY15tr_m240lflr_TR10232_c0_g1_i1_6_rc				0.678606	0.721452	0.319017	0.383786	0.2821	0.71584	0.631773	0.204526	0.695297	1.11356	1.1704	0.24279	0.445647	0.889456	0.458813	1.41697	0.686547	0.970962
Pp3c1_22590V3.1	Pp3c1_22590V1.1	Pp1s59_311V6.1		Pp1s59_311V2.1	Phypa_126506	Phpat.001G087800	8152	16853		metabolic process	isomerase activity						gi|148908907|gb|ABR17558.1|	unknown [Picea sitchensis].	PHYSPtr_m240lflr_YEPO_scaffold-YEPO-2076095-cf._Physcomicromitrium_sp._2	family protein	family protein	GO:0016020	11.6542	8.39675	11.0277	9.59367	13.6359	10.7742	8.60862	10.0046	9.00978	11.3511	12.1648	11.1033	8.22954	10.3837	10.3289	10.7221	9.99699	10.5457
Pp3c1_22600V3.1		Pp1s59_308V6.1;Pp1s59_309V6.1				Phpat.001G087900	0071555:0030244	0016760:0008270	0005886:0016021	cell wall organization:cellulose biosynthetic process	cellulose synthase (UDP-forming) activity:zinc ion binding	plasma membrane:integral component of membrane	ARATHwo_AT5G05170.1	Encodes a cellulose synthase isomer. CESA3 mutants have cellulose defect in the primary cell wall. Multiple lines of evidence suggest that CESA3, along with CESA1 and CESA6 are present in the same plasma membrane complex for cellulose biosynthesis. As inferred from the null role of secondary wall-type CesAs, included in a set of five primary wall-type CesAs that may support trichome cell wall thi…	sp|Q69V23|CESA3_ORYSJ	Probable cellulose synthase A catalytic subunit 3 [UDP-forming]	gi|641841468|gb|KDO60380.1|	hypothetical protein CISIN_1g001574mg [Citrus sinensis].	FUNHY15tr_m240lflr_TR41423_c0_g1_i1_16_rc				0.110637	0.0636754	0.0573186	0.160897	0.0788441	0.131296	0.325984	0.128617	0.269071	0.101488	0.356854	0.237501	0.0373662	0.16573	0.256468	0.212159	0.0885615	0.135687
Pp3c1_22610V3.1	Pp3c1_22610V1.1																									0.593124		0.76058	1.44579	0.651927	1.36385	0.617301	1.1305	0.343952	0.946999	1.68008	0.216662	0.860306		0.196504
Pp3c1_22620V3.1	Pp3c1_22620V1.1	Pp1s59_306V6.1;Pp1s59_307V6.1				Phpat.001G088000											gi|593700081|ref|XP_007150479.1|	hypothetical protein PHAVU_005G156000g [Phaseolus vulgaris].	FUNHY15tr_m240lflr_TR10988_c0_g1_i1_3				16.806	17.9366	19.6272	18.4844	19.268	18.9435	20.9001	16.9057	23.0663	25.0359	21.4323	21.5605	20.472	20.5344	21.2925	21.6262	18.8018	21.743
Pp3c1_22640V3.1	Pp3c1_22640V1.1	Pp1s59_305V6.1		Pp1s59_305V2.1	Phypa_76575	Phpat.001G088200	6471	3950	5634	protein ADP-ribosylation	NAD+ ADP-ribosyltransferase activity	nucleus			sp|P35875|PARP_DROME	Poly [ADP-ribose] polymerase	gi|659117609|ref|XP_008458691.1|	PREDICTED: putative poly [ADP-ribose] polymerase 3 [Cucumis melo].	FUNHY15tr_m240lflr_TR10916_c0_g1_i2_7_rc	poly (adp-ribose) polymerase member 1	poly (adp-ribose) polymerase member 1	GO:0003950, GO:0005515, GO:0005634, GO:0006259, GO:0006471, GO:0006974, GO:0010467, GO:0031981, GO:0051716	6.0149	8.75672	6.13085	23.6954	4.70534	13.7083	6.00901	5.67337	21.2359	13.079	17.4579	14.5847	2.73091	3.08185	2.16277	3.41309	3.31286	6.37084		-1.78476		-2.04583
Pp3c1_22650V3.1	Pp3c1_22650V1.1	Pp1s59_304V6.1				Phpat.001G088300											gi|502152386|ref|XP_004508903.1|	PREDICTED: peroxisome biogenesis protein 19-2-like [Cicer arietinum].	TETPEtr_onekp_HVBQ_125099				0.772653	1.31696	0.790323	0.275019	0.592976	0.916927	0.383075	0.322437		0.152656	0.754832	0.255173	0.632309	1.01272	0.160738	0.319124	0.582802	0.510243
Pp3c1_22660V3.1	Pp3c1_22660V1.1	Pp1s59_301V6.1		Pp1s59_301V2.1	Phypa_76574	Phpat.001G088400													AULHEtr_m240lflr_WNGH_scaffold-WNGH-2074265-Aulacomnium_heterostichum_2_rc	Ubiquinol-cytochrome c reductase complex 6.7 kDa protein (CR6) [Solanum tuberosum]	Ubiquinol-cytochrome c reductase complex 6.7 kDa protein (CR6) [Solanum tuberosum]	GO:0016020	6.39004	4.94188	3.65538	1.05601	1.63651	3.31766	28.6093	22.9045	18.4545	12.6757	21.0937	12.37	4.04653	8.97374	6.17197	7.88826	3.35673	9.51617				-1.86721		2.94095	2.22313
Pp3c1_22690V3.1	Pp3c1_22690V1.1	Pp1s59_300V6.1		Pp1s59_300V2.1	Phypa_126386	Phpat.001G088600	8152	0016787:0030145:0003723		metabolic process	hydrolase activity:manganese ion binding:RNA binding						gi|694995201|ref|XP_009420723.1|	PREDICTED: mRNA-decapping enzyme subunit 2 isoform X1 [Musa acuminata subsp. malaccensis].	PHYSPtr_m240lflr_YEPO_scaffold-YEPO-2012048-cf._Physcomicromitrium_sp._2	decapping enzyme dcp2	decapping enzyme dcp2	GO:0003723, GO:0005739, GO:0016787, GO:0030145	13.6275	16.5703	19.5087	25.1772	18.3752	15.8781	27.7447	28.4966	32.7137	35.3835	33.2624	36.9483	19.9944	21.6722	18.9635	25.0331	25.2678	26.1533
Pp3c1_2270V3.1	Pp3c1_2270V1.1	Pp1s346_29V6.1		Pp1s346_29V2.1	Phypa_98200	Phpat.001G008900	0007264:0006913:0006891:0008152:0006886	0003924:0005525	139	small GTPase mediated signal transduction:nucleocytoplasmic transport:intra-Golgi vesicle-mediated transport:metabolic process:intracellular protein transport	GTPase activity:GTP binding	Golgi membrane					gi|595829654|ref|XP_007205911.1|	hypothetical protein PRUPE_ppa011539mg [Prunus persica].	PHYSPtr_m240lflr_YEPO_scaffold-YEPO-2002153-cf._Physcomicromitrium_sp._4_rc	gtp-binding protein	gtp-binding protein	GO:0005525, GO:0005737, GO:0005739, GO:0007264, GO:0015031, GO:0016023, GO:0016787	11.3882	9.93936	7.5809	9.4888	5.75771	9.17718	8.08394	5.97464	11.2711	7.90541	9.33809	9.68366	10.1418	12.4556	10.6391	8.8828	10.3747	8.13934
Pp3c1_22710V3.1	Pp3c1_22710V1.1	Pp1s59_296V6.1		Pp1s59_296V2.1	Phypa_126410	Phpat.001G088700											gi|302818638|ref|XP_002990992.1|	hypothetical protein SELMODRAFT_185742 [Selaginella moellendorffii].	PHYSPtr_onekp_YEPO_18912	at5g27210 t21b4_120	at5g27210 t21b4_120	GO:0016020	8.94862	7.14387	8.82349	5.9535	5.50283	6.82686	9.27608	10.5147	9.44824	7.89087	7.88502	7.65732	8.67685	8.67518	8.699	7.14077	6.18105	7.58622
Pp3c1_22720V3.1	Pp3c1_22720V1.1	Pp1s59_294V6.1;Pp1s59_295V6.1				Phpat.001G088800																	0.685325	0.536859	0.368201	0.563762	0.759714	0.271098	0.687108	0.619654	0.972251	0.586742	0.429814	0.65385	0.630083	0.299421	0.308904	0.408858	0.106668	0.653717
Pp3c1_22730V3.1	Pp3c1_22730V1.1	Pp1s59_294V6.1				Phpat.001G088900	0009553:0009220:0009555:0006364			embryo sac development:pyrimidine ribonucleotide biosynthetic process:pollen development:rRNA processing							gi|296086673|emb|CBI32308.3|	unnamed protein product, partial [Vitis vinifera].	PHIFOtr_onekp_ORKS_55287				7.90007	6.07158	9.08411	5.09484	5.11495	4.21395	6.63534	5.56262	8.23974	7.70633	6.75873	7.2976	5.82435	6.74679	5.39716	6.76174	4.16442	4.79375
Pp3c1_22750V3.1	Pp3c1_22750V1.1	Pp1s59_293V6.1		Pp1s59_293V2.1	Phypa_126303	Phpat.001G089100	0006886:0006888	8270	30127	intracellular protein transport:ER to Golgi vesicle-mediated transport	zinc ion binding	COPII vesicle coat			sp|O94855|SC24D_HUMAN	Protein transport protein Sec24D	gi|565372373|ref|XP_006352770.1|	PREDICTED: protein transport protein Sec24-like CEF-like [Solanum tuberosum].	PHYSPtr_onekp_YEPO_3893	T22K7.20; sec23/sec24 transport family protein	T22K7.20; sec23/sec24 transport family protein	GO:0005515, GO:0005737, GO:0006886, GO:0006888, GO:0008270, GO:0009536, GO:0016020, GO:0030127	18.0993	20.0144	21.1002	22.8966	18.5867	20.6079	19.2233	16.717	22.1467	21.002	21.89	19.8973	19.85	21.1653	21.1094	20.3662	19.5107	19.6724
Pp3c1_22760V3.1	Pp3c1_22760V1.1
Pp3c1_22770V3.1	Pp3c1_22770V1.1
Pp3c1_22780V3.1	Pp3c1_22780V1.1	Pp1s59_289V6.1		Pp1s59_289V2.1	Phypa_76567														RACELtr_onekp_ABCD_71087			GO:0016020
Pp3c1_22790V3.1	Pp3c1_22790V1.1	Pp1s59_291V6.1		Pp1s59_289V2.1	Phypa_76567
Pp3c1_22810V3.1	Pp3c1_22810V1.1	Pp1s59_288V6.1;Pp1s59_289V6.1;Pp1s59_290V6.1;Pp1s59_291V6.1		Pp1s59_288V2.1	Phypa_44526	Phpat.001G089200	0042545:0045490	0030599:0045330	0005618:0005576	cell wall modification:pectin catabolic process	pectinesterase activity:aspartyl esterase activity	cell wall:extracellular region					gi|302756589|ref|XP_002961718.1|	hypothetical protein SELMODRAFT_76693 [Selaginella moellendorffii].	FUNHY15tr_m240lflr_TR17617_c0_g1_i1_2	pectin methylesterase	pectin methylesterase	GO:0005618, GO:0016023, GO:0030599, GO:0042545	0.0877352	0.114875	0.116664	0.202986	0.0218831	0.0624706	0.192263	0.15469	0.323615	0.529558	0.396178	0.27309	0.114081	0.333487	0.177956	0.388639	0.0737407	0.13988
Pp3c1_22820V3.1	Pp3c1_22820V1.1	Pp1s59_287V6.1		Pp1s59_287V2.1	Phypa_126454	Phpat.001G089300	0006412:0035335:0006354:0042254	0003735:0004725	0005840:0009507	translation:peptidyl-tyrosine dephosphorylation:DNA-templated transcription, elongation:ribosome biogenesis	structural constituent of ribosome:protein tyrosine phosphatase activity	ribosome:chloroplast					gi|567190880|ref|XP_006404765.1|	hypothetical protein EUTSA_v10000673mg [Eutrema salsugineum].	PHYSPtr_m240lflr_YEPO_scaffold-YEPO-2075783-cf._Physcomicromitrium_sp._2	50s ribosomal protein l18	50s ribosomal protein l18	GO:0003735, GO:0005739, GO:0005840, GO:0006412, GO:0042254	7.75167	6.30711	9.59105	4.92317	6.36898	6.09666	8.46411	7.13255	8.32327	6.75372	6.60606	8.90741	11.0316	11.7938	11.3452	9.30354	8.04819	7.90366
Pp3c1_22851V3.1																							0.137092		0.828616	0.126871	0.427424	0.162691	0.35344	0.371866	0.388977	0.440144	0.193455	0.220718	0.891294	1.25782	0.370758	0.552068	0.576123	0.84066
Pp3c1_22860V3.1	Pp3c1_22860V1.1	Pp1s59_284V6.1		Pp1s59_284V2.1	Phypa_47073	Phpat.001G089500													AULHEtr_m240lflr_WNGH_scaffold-WNGH-2084348-Aulacomnium_heterostichum_1			GO:0005739, GO:0009536	16.7412	19.0887	16.2546	12.1006	13.7892	11.2194	13.7365	14.4124	13.1806	12.6176	12.566	12.951	13.614	14.259	14.3694	11.4353	12.3702	11.9586
Pp3c1_22880V3.1	Pp3c1_22880V1.1	Pp1s59_282V6.1					6468	0005524:0004674		protein phosphorylation	ATP binding:protein serine/threonine kinase activity		ARATHwo_AT3G24540.1	Encodes a member of the proline-rich extensin-like receptor kinase (PERK) family. This family consists of 15 predicted receptor kinases (PMID: 15653807).	sp|Q1PEM5|PERK3_ARATH	Proline-rich receptor-like protein kinase PERK3	gi|460402729|ref|XP_004246863.1|	PREDICTED: wall-associated receptor kinase-like 20 [Solanum lycopersicum].	PHYSPtr_m240lflr_YEPO_scaffold-YEPO-2009599-cf._Physcomicromitrium_sp._2					0.0265551	0.15936	0.0610001		0.0469333	0.0849673	0.107276	0.0374042	0.152368	0.167424	0.240543	0.233747	0.224626	0.285218	0.460088	0.110801	0.0646706
Pp3c1_22890V3.1	Pp3c1_22890V1.1	Pp1s59_282V6.1																	FRUSPtr_m240lflr_CHJJ_scaffold-CHJJ-2138532-Lejeuneaceae_sp._6_rc															0.101912
Pp3c1_22900V3.1	Pp3c1_22900V1.1	Pp1s59_281V6.1		Pp1s59_281V2.1	Phypa_76562	Phpat.001G089800	0006886:0006888	8270	30127	intracellular protein transport:ER to Golgi vesicle-mediated transport	zinc ion binding	COPII vesicle coat	ARATHwo_AT2G27460.1	sec23/sec24 transport family protein; FUNCTIONS IN: transporter activity, zinc ion binding; INVOLVED IN: intracellular protein transport, vesicle-mediated transport, ER to Golgi vesicle-mediated transport; LOCATED IN: COPII vesicle coat; EXPRESSED IN: 22 plant structures; EXPRESSED DURING: 13 growth stages; CONTAINS InterPro DOMAIN/s: Sec23/Sec24, helical domain (InterPro:IPR006900), Sec23/Sec24 …	sp|A1CUC3|SEC24_ASPCL	Protein transport protein sec24	gi|567880983|ref|XP_006433050.1|	hypothetical protein CICLE_v10000082mg [Citrus clementina].	PHYSPtr_onekp_YEPO_3893	T22K7.20; sec23/sec24 transport family protein	T22K7.20; sec23/sec24 transport family protein	GO:0005515, GO:0005737, GO:0006886, GO:0006888, GO:0008270, GO:0009536, GO:0016020, GO:0030127	15.2446	16.2009	18.0672	15.5721	15.8523	17.7892	16.4853	13.9688	17.8917	17.7021	15.9857	15.0682	18.3733	17.7192	18.6992	18.4139	17.5736	18.0585
Pp3c1_22930V3.1	Pp3c1_22930V1.1	Pp1s59_275V6.1		Pp1s59_275V2.1	Phypa_15168	Phpat.001G089900	6479	0003676:0008276		protein methylation	nucleic acid binding:protein methyltransferase activity						gi|296082794|emb|CBI21799.3|	unnamed protein product, partial [Vitis vinifera].	PHYSPtr_m240lflr_YEPO_scaffold-YEPO-2017691-cf._Physcomicromitrium_sp._4_rc	modification family	modification family	GO:0003676, GO:0006479, GO:0008276, GO:0009536	7.1912	11.1023	8.26452	11.0605	7.91563	10.5974	8.72587	7.66973	11.3275	10.6009	10.2906	10.8712	9.47831	10.6646	10.3632	10.3101	8.86757	10.4135
Pp3c1_22940V3.1	Pp3c1_22940V1.1																		MONGOtr_m240lflr_TFDQ_scaffold-TFDQ-2095006-Monoclea_gottschei_1
Pp3c1_22950V3.1	Pp3c1_22950V1.1	Pp1s59_272V6.1		Pp1s59_272V2.1	Phypa_163735	Phpat.001G090000													PHYSPtr_m240lflr_YEPO_scaffold-YEPO-2007371-cf._Physcomicromitrium_sp._9_rc	f-box leucine rich repeat protein	f-box leucine rich repeat protein	GO:0005488	13.5993	11.2685	16.8889	11.4697	17.2268	10.9641	16.5427	13.3862	23.4328	17.2331	14.357	17.2692	13.7447	18.061	16.2715	17.4229	13.0052	15.2137
Pp3c1_22970V3.1	Pp3c1_22970V1.1	Pp1s59_271V6.1																				GO:0005739
Pp3c1_23000V3.1	Pp3c1_23000V1.1	Pp1s59_267V6.1;Pp1s59_268V6.1			Phypa_163734	Phpat.001G090100																	1.51212	1.49955	1.99665	1.87302	2.23393	1.76686	1.52938	2.01928	1.45214	1.40415	1.93683	1.42325	0.962468	1.21966	0.754974	1.43644	1.3361	1.398
Pp3c1_23010V3.1	Pp3c1_23010V1.1	Pp1s59_264V6.1;Pp1s59_265V6.1		Pp1s59_265V2.1	Phypa_126351	Phpat.001G090200	8152	0016787:0046872		metabolic process	hydrolase activity:metal ion binding						gi|698526815|ref|XP_009760250.1|	PREDICTED: 5'-nucleotidase domain-containing protein 4 isoform X1 [Nicotiana sylvestris].	FUNHY15tr_m240lflr_TR3223_c0_g1_i1_1	had superfamily (subfamily ig) 5 -nucleotidase	had superfamily (subfamily ig) 5 -nucleotidase	GO:0005739, GO:0009536, GO:0016787	20.5374	17.6438	18.5395	15.7688	20.9179	19.7472	15.1402	16.3805	13.681	14.6735	14.4717	14.4481	12.2799	11.3148	11.5473	10.9629	15.6702	13.2625
Pp3c1_23020V3.1	Pp3c1_23020V1.1	Pp1s59_264V6.1;Pp1s59_265V6.1		Pp1s59_264V2.1	Phypa_43124		0007275:0006468:0007165	0004674:0005524	0016020:0044464	multicellular organismal development:protein phosphorylation:signal transduction	protein serine/threonine kinase activity:ATP binding	membrane:cell part	ARATHwo_AT1G51890.1	Leucine-rich repeat protein kinase family protein; FUNCTIONS IN: kinase activity; INVOLVED IN: protein amino acid phosphorylation; LOCATED IN: endomembrane system; EXPRESSED IN: 9 plant structures; EXPRESSED DURING: 8 growth stages; CONTAINS InterPro DOMAIN/s: Protein kinase, ATP binding site (InterPro:IPR017441), Serine/threonine-protein kinase domain (InterPro:IPR002290), Leucine-rich repeat (I…	sp|Q9SI06|Y5573_ARATH	Putative leucine-rich repeat receptor-like serine/threonine-protein kinase At2g04300	gi|729306323|ref|XP_010528530.1|	PREDICTED: serine/threonine-protein kinase At3g07070-like [Tarenaya hassleriana].	PHYSPtr_m240lflr_YEPO_scaffold-YEPO-2002600-cf._Physcomicromitrium_sp._2	nodulation receptor kinase	nodulation receptor kinase	GO:0004674, GO:0005515, GO:0005524, GO:0006468, GO:0016020, GO:0044464	0.0413488	0.093703	0.137457	0.0860987	0.0515666	0.110407	0.719563	0.799137	0.601268	0.384984	0.685594	0.299571	0.244387	0.257432	0.265585	0.291394	0.27513	0.253554
Pp3c1_23030V3.1																																								0.299435
Pp3c1_23040V3.1	Pp3c1_23040V1.1	Pp1s59_259V6.1		Pp1s59_259V2.1	Phypa_182742		0007275:0006468:0007165	0004674:0005524	0016020:0044464	multicellular organismal development:protein phosphorylation:signal transduction	protein serine/threonine kinase activity:ATP binding	membrane:cell part	ARATHwo_AT5G51560.1	Leucine-rich repeat protein kinase family protein; FUNCTIONS IN: protein serine/threonine kinase activity, protein kinase activity, ATP binding; INVOLVED IN: transmembrane receptor protein tyrosine kinase signaling pathway, protein amino acid phosphorylation; LOCATED IN: endomembrane system; EXPRESSED IN: 21 plant structures; EXPRESSED DURING: 14 growth stages; CONTAINS InterPro DOMAIN/s: Protein…	sp|Q9FZB8|Y5181_ARATH	Probable LRR receptor-like serine/threonine-protein kinase At1g51810	gi|586678876|ref|XP_006840144.1|	PREDICTED: probable LRR receptor-like serine/threonine-protein kinase At5g48740 [Amborella trichopoda].	PHYSPtr_m240lflr_YEPO_scaffold-YEPO-2002600-cf._Physcomicromitrium_sp._2	nodulation receptor kinase:F12A21.30; leucine-rich repeat family protein / protein kinase family protein	nodulation receptor kinase:F12A21.30; leucine-rich repeat family protein / protein kinase family protein	GO:0004674, GO:0005515, GO:0005524, GO:0006468, GO:0016020, GO:0044464	0.0719894	0.314195	0.188552	0.111037	0.0448895	0.0996703	1.17545	0.927547	0.612776	0.539296	0.694174	0.412099	0.297839	0.188715	0.292037	0.467061	0.352954	0.42673
Pp3c1_23090V3.1	Pp3c1_23090V1.1	Pp1s59_257V6.1		Pp1s59_257V2.1	Phypa_76551		0060151:0006606:0051646:0051645:0008152:0030048	0005516:0005524:0003774:0003779	0016459:0005737	peroxisome localization:protein import into nucleus:mitochondrion localization:Golgi localization:metabolic process:actin filament-based movement	calmodulin binding:ATP binding:motor activity:actin binding	myosin complex:cytoplasm					gi|702302926|ref|XP_010049283.1|	PREDICTED: myosin-15 [Eucalyptus grandis].	MICMAtr_m240lflr_c39990_g1_i1_1	myosin family expressed	myosin family expressed	GO:0003774, GO:0005524, GO:0016459	1.44721	3.644	1.37457	2.29596	1.03133	2.20813	4.93034	3.22459	3.66627	3.45158	5.98072	3.21762	2.56606	1.08392	2.09673	2.22014	0.434416	1.90165
Pp3c1_23120V3.1	Pp3c1_23120V1.1	Pp1s59_252V6.1															gi|731424250|ref|XP_010662801.1|	PREDICTED: uncharacterized protein LOC104882222 [Vitis vinifera].	CANSA_PK27831.1					1.06111		1.4625	0.656944	0.833512	0.67904	1.90518	1.49463	0.901993	1.48669	0.376934	0.415123	1.84119	1.8995	3.0641	0.983882	1.07674
Pp3c1_23130V3.1	Pp3c1_23130V1.1																																					1.43384		1.96504
Pp3c1_23140V3.1	Pp3c1_23140V1.1	Pp1s59_251V6.1;Pp1s59_252V6.1																					4.08921	3.32655	3.70742	3.56602	2.746	2.98632	5.37261	3.19964	2.34281	3.0297	4.32781	3.0386	6.13516	5.77207	4.25348	4.75015	3.63523	4.6293
Pp3c1_23150V3.1	Pp3c1_23150V1.1	Pp1s59_250V6.1															gi|552810822|ref|XP_005843305.1|	hypothetical protein CHLNCDRAFT_141166 [Chlorella variabilis].	PHYSPtr_onekp_YEPO_17958				3.62674	3.80328	4.23639	2.89124	3.11695	3.78812	5.39298	3.44501	4.77902	3.69814	4.21692	3.7469	3.42004	4.68239	4.24293	3.19082	3.19666	3.44837
Pp3c1_23160V3.1	Pp3c1_23160V1.1	Pp1s59_249V6.1		Pp1s59_249V2.1	Phypa_210141	Phpat.001G090700	6397		5634	mRNA processing		nucleus					gi|302815681|ref|XP_002989521.1|	hypothetical protein SELMODRAFT_129910, partial [Selaginella moellendorffii].	PHYSPtr_m240lflr_YEPO_scaffold-YEPO-2011055-cf._Physcomicromitrium_sp._15_rc	pre-mrna-processing protein	pre-mrna-processing protein	GO:0005622, GO:0006396, GO:0048510	94.721	122.013	93.8591	99.9007	96.9534	93.8988	92.0846	99.4887	112.905	117.77	118.697	94.58	80.2416	97.5704	82.5959	91.5614	81.3852	81.8525
Pp3c1_23169V3.1		Pp1s59_248V6.1																						0.148773		0.227833		0.0584312	0.507758	0.467451	0.139703	0.379391	0.0694802	0.158544		0.258143	0.199739		0.27589	0.0603854
Pp3c1_23170V3.1	Pp3c1_23170V1.1	Pp1s59_246V6.1;Pp1s59_248V6.1		Pp1s59_248V2.1:Pp1s59_246V2.1	Phypa_76547:Phypa_76546	Phpat.001G090800	6813			potassium ion transport							gi|302763139|ref|XP_002964991.1|	hypothetical protein SELMODRAFT_439187 [Selaginella moellendorffii].	CERPUGG1tr_m240lflr_isotig09086_9_rc	:F18A5.20; expressed protein [Arabidopsis thaliana]	:F18A5.20; expressed protein [Arabidopsis thaliana]	GO:0016020	0.166514	0.251565	0.20129	0.182994	0.0648943	0.494016	1.07323	0.875118	0.767743	0.347493	0.499317	0.558515	0.110718	0.450144	0.168873	0.307335	0.102049	0.216979
Pp3c1_23190V3.1	Pp3c1_23190V1.1	Pp1s59_245V6.1		Pp1s59_245V2.1	Phypa_126512	Phpat.001G090900	55085		0016021:0009536	transmembrane transport		integral component of membrane:plastid	ARATHwo_AT2G47490.1	Encodes a chloroplast-localized NAD+ transporter that transports NAD+ in a counter exchange mode with ADP and AMP in vitro.	sp|O22261|NDT1_ARATH	Nicotinamide adenine dinucleotide transporter 1, chloroplastic	gi|729425825|ref|XP_010559180.1|	PREDICTED: nicotinamide adenine dinucleotide transporter 1, chloroplastic [Tarenaya hassleriana].	BRYARtr_onekp_JMXW_11451	mitochondrial carrier	mitochondrial carrier	GO:0005488, GO:0005743, GO:0006839, GO:0009536, GO:0016020, GO:0043132, GO:0051724	4.32346	4.38738	3.35278	4.63528	3.2758	4.53056	6.30928	5.13355	4.46709	7.75228	10.1299	5.21838	4.3971	3.65669	2.97829	7.0518	2.28543	6.56292
Pp3c1_23200V3.1	Pp3c1_23200V1.1		Pp1s59_239V6.1;Pp1s59_242V6.1	Pp1s59_242V2.1	Phypa_182738	Phpat.001G091000	6457	0005524:0051082		protein folding	ATP binding:unfolded protein binding						gi|225429228|ref|XP_002263457.1|	PREDICTED: heat shock 70 kDa protein, mitochondrial [Vitis vinifera].	FUNHY15tr_m240lflr_TR48104_c0_g1_i9_5	heat shock 70 kda protein	heat shock 70 kda protein	GO:0005524, GO:0005739, GO:0006457, GO:0006950, GO:0032440, GO:0051082, GO:0055114	5.88899	10.1598	7.36578	8.91524	8.4763	8.41597	5.20711	4.8784	6.61603	9.15114	6.85306	5.44397	5.87481	6.70745	6.32148	6.80832	5.48371	5.90035
Pp3c1_23220V3.1	Pp3c1_23220V1.1		Pp1s59_239V6.1;Pp1s59_242V6.1	Pp1s59_242V2.1	Phypa_182738	Phpat.001G091100	6457	0005524:0051082		protein folding	ATP binding:unfolded protein binding				sp|C0ZB48|DNAK_BREBN	Chaperone protein DnaK	gi|548860508|gb|ERN18094.1|	hypothetical protein AMTR_s00046p00228720 [Amborella trichopoda].	FUNHY15tr_m240lflr_TR48104_c0_g1_i9_5	heat shock 70 kda protein	heat shock 70 kda protein	GO:0005524, GO:0005739, GO:0006457, GO:0006950, GO:0032440, GO:0051082, GO:0055114	3.22783	5.50368	4.11701	4.93943	3.91453	4.32822	2.7193	3.79178	4.20063	4.5859	3.46099	2.80981	3.66532	3.69774	3.84922	3.65047	2.83045	3.41317
Pp3c1_23250V3.1	Pp3c1_23250V1.1	Pp1s59_238V6.1		Pp1s59_238V2.1	Phypa_182732	Phpat.001G091200	55085		16021	transmembrane transport		integral component of membrane	ARATHwo_AT3G55640.1	Mitochondrial substrate carrier family protein; FUNCTIONS IN: binding, transporter activity; INVOLVED IN: transport, mitochondrial transport, transmembrane transport; LOCATED IN: mitochondrial inner membrane, plasma membrane; EXPRESSED IN: 22 plant structures; EXPRESSED DURING: 13 growth stages; CONTAINS InterPro DOMAIN/s: Mitochondrial carrier protein (InterPro:IPR002067), Mitochondrial substrat…	sp|Q54MZ4|MCFB_DICDI	Mitochondrial substrate carrier family protein B	gi|720021201|ref|XP_010262654.1|	PREDICTED: mitochondrial substrate carrier family protein B-like isoform X1 [Nelumbo nucifera].	FUNHY15tr_m240lflr_TR15502_c0_g1_i3_6_rc	mitochondrial substrate carrier family protein	mitochondrial substrate carrier family protein	GO:0005215, GO:0005488, GO:0005743, GO:0005886, GO:0006839, GO:0016020	14.9235	13.7242	12.6765	13.2724	11.0972	16.1995	15.096	12.3644	17.0438	17.2346	13.7371	11.4636	13.6569	14.5074	13.5571	16.029	12.0913	12.3255
Pp3c1_23260V3.1	Pp3c1_23260V1.1	Pp1s59_236V6.1		Pp1s59_236V2.1	Phypa_106065	Phpat.001G091300	0055114:0006098:0006006	0004345:0050661	5739	oxidation-reduction process:pentose-phosphate shunt:glucose metabolic process	glucose-6-phosphate dehydrogenase activity:NADP binding	mitochondrion			sp|O84188|G6PD_CHLTR	Glucose-6-phosphate 1-dehydrogenase	gi|33304517|gb|AAQ02671.1|	putative plastidic glucose-6-phosphate dehydrogenase [Oryza sativa Japonica Group].	CERPUR40tr_m240lflr_isotig07127_2	glucose-6-phosphate 1-dehydrogenase	glucose-6-phosphate 1-dehydrogenase	GO:0004345, GO:0005488, GO:0005739, GO:0009536, GO:0055114	9.71185	8.82489	9.48317	9.70016	9.27276	9.07642	9.22574	6.3749	11.2686	9.38046	8.34298	9.56269	10.5315	10.6901	11.1394	9.98072	8.46556	11.3885
Pp3c1_23300V3.1	Pp3c1_23300V1.1	Pp1s59_232V6.1		Pp1s59_232V2.1	Phypa_210127	Phpat.001G091600	6887		145	exocytosis		exocyst					gi|145359157|ref|NP_200047.3|	exocyst subunit exo70-A2 [Arabidopsis thaliana].	PHYSPtr_onekp_YEPO_6157	protein binding	protein binding	GO:0000145, GO:0005737, GO:0006887	18.3822	13.5382	12.6778	8.70287	9.36294	9.21574	12.7541	14.0489	16.196	15.3735	14.7993	11.3258	17.5663	20.391	19.5192	17.9045	13.2455	13.2101
Pp3c1_23330V3.1	Pp3c1_23330V1.1		Pp1s59_231V6.1	Pp1s59_229V2.1	Phypa_76538															F13K3.4; late embryogenesis abundant protein (ECP63) / LEA protein [Arabidopsis thaliana]
Pp3c1_23331V3.1			Pp1s59_231V6.1																				0.158466		0.0638535	0.391071	0.13175				0.0749369									0.129563
Pp3c1_23349V3.1																	gi|296083745|emb|CBI23734.3|	unnamed protein product, partial [Vitis vinifera].
Pp3c1_23350V3.1	Pp3c1_23350V1.1																gi|296083745|emb|CBI23734.3|	unnamed protein product, partial [Vitis vinifera].
Pp3c1_23370V3.1	Pp3c1_23370V1.1	Pp1s59_224V6.1		Pp1s59_224V2.1	Phypa_182724	Phpat.001G091700	55114	0020037:0016705:0004497:0005506		oxidation-reduction process	heme binding:oxidoreductase activity, acting on paired donors, with incorporation or reduction of molecular oxygen:monooxygenase activity:iron ion binding		ARATHwo_AT1G34540.1	member of CYP94D	sp|Q9SMP5|C94B3_ARATH	Cytochrome P450 94B3	gi|661890174|emb|CDP06233.1|	unnamed protein product [Coffea canephora].	FUNHY15tr_m240lflr_TR5486_c0_g1_i2_7_rc	cytochrome p450	cytochrome p450	GO:0004497, GO:0009055, GO:0016020, GO:0020037	4.50597	3.97964	4.44634	3.32497	4.17202	4.00039	3.8063	4.37512	4.1648	3.77011	3.98611	3.46242	3.95445	3.61296	4.02743	3.33354	3.68202	3.15035
Pp3c1_23380V3.1	Pp3c1_23380V1.1	Pp1s59_223V6.1	Pp1s61_168V6.1	Pp1s59_223V2.1	Phypa_182722	Phpat.001G091800	0030244:0006508:0048193	0070008:0004252	0005829:0009507	cellulose biosynthetic process:proteolysis:Golgi vesicle transport	serine-type exopeptidase activity:serine-type endopeptidase activity	cytosol:chloroplast			sp|Q59536|PTRB_MORLA	Protease 2	gi|685274241|ref|XP_009128156.1|	PREDICTED: prolyl endopeptidase-like [Brassica rapa].	PHYSPtr_m240lflr_YEPO_scaffold-YEPO-2082308-cf._Physcomicromitrium_sp._7_rc	prolyl endopeptidase	prolyl endopeptidase	GO:0004252, GO:0005634, GO:0005739, GO:0005829, GO:0006508, GO:0009507, GO:0016020, GO:0042277	1.27358	1.57069	1.50814	1.73187	0.810357	1.32632	3.56823	3.24311	4.60916	3.52148	3.66773	4.71467	1.4133	1.83963	1.65187	1.099	2.02072	1.546
Pp3c1_2340V3.1	Pp3c1_2340V1.1	Pp1s346_26V6.1		Pp1s346_26V2.1	Phypa_61287	Phpat.001G009000	0048767:0043269:1901679:0043090:0009853:0007010:0010363:0043069:0015802:0080129:0006612:0006888:0010498:0015867:0034220:0015860:0061025:0015866:0051788:0015696:0006094:0006511	0005507:0005200:0005471:0005515:0005524	0005856:0016021:0005774:0005829:0009506:0009941:0005618:0005886:0005794:0005743:0005730	root hair elongation:regulation of ion transport:nucleotide transmembrane transport:amino acid import:photorespiration:cytoskeleton organization:regulation of plant-type hypersensitive response:negative regulation of programmed cell death:basic amino acid transport:proteasome core complex assembly:protein targeting to membrane:ER to Golgi vesicle-mediated transport:proteasomal protein catabolic p…	copper ion binding:structural constituent of cytoskeleton:ATP:ADP antiporter activity:protein binding:ATP binding	cytoskeleton:integral component of membrane:vacuolar membrane:cytosol:plasmodesma:chloroplast envelope:cell wall:plasma membrane:Golgi apparatus:mitochondrial inner membrane:nucleolus	ARATHwo_AT5G13490.1	Encodes mitochondrial ADP/ATP carrier	sp|P04709|ADT1_MAIZE	ADP,ATP carrier protein 1, mitochondrial	gi|157168258|gb|ABV25603.1|	putative mitochondrial ADP/ATP translocase [Marchantia polymorpha].	PHYSPtr_m240lflr_YEPO_scaffold-YEPO-2082216-cf._Physcomicromitrium_sp._4_rc	carrier protein	carrier protein	GO:0005215, GO:0005488, GO:0005739, GO:0005743, GO:0016020, GO:0016021, GO:0055085	2.38551	0.160176	0.576741	0.64758	0.277666	1.50984	1.02502	1.25101	0.496356	0.367624	0.673251	0.580366	0.902352	0.416894	0.473107	0.683121	0.623776	0.624133
Pp3c1_23410V3.1	Pp3c1_23410V1.1	Pp1s59_217V6.1;Pp1s59_218V6.1				Phpat.001G092000	0000023:0019252:0010207:0043085		9507	maltose metabolic process:starch biosynthetic process:photosystem II assembly:positive regulation of catalytic activity		chloroplast	ARATHwo_AT5G27560.1	FUNCTIONS IN: molecular_function unknown; INVOLVED IN: biological_process unknown; LOCATED IN: chloroplast; EXPRESSED IN: 22 plant structures; EXPRESSED DURING: 13 growth stages; CONTAINS InterPro DOMAIN/s: Domain of unknown function DUF1995 (InterPro:IPR018962); Has 30201 Blast hits to 17322 proteins in 780 species: Archae - 12; Bacteria - 1396; Metazoa - 17338; Fungi - 3422; Plants - 5037; Viru…			gi|802756704|ref|XP_012089061.1|	PREDICTED: uncharacterized protein LOC105647545 [Jatropha curcas].	PHYSPtr_m240lflr_YEPO_scaffold-YEPO-2015929-cf._Physcomicromitrium_sp._2_rc			GO:0005737, GO:0016023	43.5028	38.4331	43.9533	40.4584	49.9663	44.8062	29.6312	26.1135	25.4484	25.0714	21.5995	30.9557	28.1878	28.2986	35.731	30.2068	39.2345	29.6732
Pp3c1_23426V3.1			Pp1s127_29V6.1																RACVAtr_m240lflr_RDOO_scaffold-RDOO-2016133-Racomitrium_varium_3_rc				7.38568	2.33613	5.01747	2.54196	3.27325	3.33206	3.06861	4.55314	4.06991	3.44905	2.8424	3.53779	6.99878	7.52037	8.25378	4.26056	7.78087	5.53955
Pp3c1_23449V3.1		Pp1s59_213V6.1					6508	4190		proteolysis	aspartic-type endopeptidase activity								PHYSPtr_onekp_YEPO_76301				10.5439	6.43427	10.7216	9.47085	9.74608	10.6726	19.4282	18.9269	14.6944	13.1425	16.7168	18.0408	12.0972	9.91791	11.4062	9.49111	15.3783	13.768
Pp3c1_23460V3.1	Pp3c1_23460V1.1	Pp1s59_212V6.1																					27.4168	21.3261	20.7725	15.6942	20.2262	20.9271	24.1005	34.0421	29.3085	26.531	28.0175	28.8056	20.3125	17.4616	18.4063	14.816	29.4356	22.1795
Pp3c1_23490V3.1	Pp3c1_23490V1.1	Pp1s59_209V6.1		Pp1s59_209V2.1	Phypa_126286		6468	0005524:0004674		protein phosphorylation	ATP binding:protein serine/threonine kinase activity		ARATHwo_AT3G45240.1	Encodes a geminivirus Rep interacting kinase (GRIK; GRIK1/AT3G45240, GRIK2/AT5G60550). GRIKs are SnRK1 (SNF1-related kinases) activating kinases. Both GRIKs specifically bind to the SnRK1 catalytic subunit and phosphorylate the equivalent threonine residue in its activation loop in vitro.	sp|Q93V58|GRIK1_ARATH	Serine/threonine-protein kinase GRIK1	gi|672194641|ref|XP_008776345.1|	PREDICTED: serine/threonine-protein kinase GRIK2-like [Phoenix dactylifera].	FUNHY15tr_m240lflr_TR5231_c0_g1_i15_9_rc	calcium calmodulin-dependent protein kinase	calcium calmodulin-dependent protein kinase	GO:0004674, GO:0004713, GO:0005524, GO:0006468	0.129436	0.0829602	0.142244	0.163345	0.117398	0.0698206	0.621899	0.67028	0.400642	0.0755571	0.132837	0.164188	0.139094	0.15423	0.095469	0.0473853	0.04945	0.158743
Pp3c1_2350V3.1	Pp3c1_2350V1.1	Pp1s346_25V6.1		Pp1s346_25V2.1	Phypa_172361	Phpat.001G009100	8152	16829		metabolic process	lyase activity						gi|565363269|ref|XP_006348360.1|	PREDICTED: uncharacterized protein LOC102596760 [Solanum tuberosum].	FUNHY15tr_m240lflr_TR20916_c0_g2_i1_2	glyoxalase bleomycin resistance protein dioxygenase	glyoxalase bleomycin resistance protein dioxygenase	GO:0005739, GO:0008152, GO:0016702	12.868	10.8883	16.1433	10.1085	14.3684	12.9624	12.6336	13.343	13.7447	10.5686	12.6687	11.8443	13.6633	13.8264	11.8363	11.6995	10.6373	12.0655
Pp3c1_23520V3.1	Pp3c1_23520V1.1	Pp1s59_208V6.1		Pp1s59_208V2.1	Phypa_182719	Phpat.001G092400	90305	0008409:0003677		nucleic acid phosphodiester bond hydrolysis	5'-3' exonuclease activity:DNA binding						gi|769794143|ref|XP_011628878.1|	PREDICTED: uncharacterized protein LOC18449113 [Amborella trichopoda].	FUNHY15tr_m240lflr_TR35508_c0_g1_i1_2	dna polymerase i	dna polymerase i	GO:0003677, GO:0008409, GO:0009536	13.4616	12.3303	14.9425	10.2171	15.0565	12.9409	11.1756	12.1946	12.5155	11.8948	9.91615	11.0137	10.5684	12.5174	11.7232	11.2738	9.91485	9.82262
Pp3c1_23530V3.1	Pp3c1_23530V1.1	Pp1s59_207V6.1				Phpat.001G092500											gi|727624948|ref|XP_010483305.1|	PREDICTED: chaperone protein ClpB1-like isoform X1 [Camelina sativa].	PHYSPtr_m240lflr_YEPO_scaffold-YEPO-2018934-cf._Physcomicromitrium_sp._5_rc			GO:0005515, GO:0005524, GO:0019538	6.2454	6.24572	5.65695	4.86288	4.62249	5.80539	8.65506	7.85852	6.96515	6.45277	6.40383	6.22865	3.8063	4.46399	4.96423	4.70229	3.75474	4.61087
Pp3c1_23558V3.1		Pp1s59_205V6.1																					7.65141	7.50764	6.65212	5.80274	4.484	6.14014	13.1697	11.6559	9.82844	10.1359	8.47683	8.61253	7.85243	9.31038	8.74552	9.03468	6.23439	8.84605
Pp3c1_23581V3.1																									0.0506376				0.377984	0.284064	0.178281	0.215181	0.413778	0.179844				0.112458
Pp3c1_23590V3.1	Pp3c1_23590V1.1	Pp1s59_199V6.1		Pp1s59_199V2.1	Phypa_126449															40s ribosomal protein s29	40s ribosomal protein s29	GO:0003735, GO:0005840, GO:0006412, GO:0008270	5.68712	5.4015	5.69935	4.77226	4.63032	4.40612	5.84963	6.47431	5.30909	4.88165	5.36403	5.02882	7.00126	6.68171	7.88947	5.89359	5.201	5.45695
Pp3c1_23600V3.1	Pp3c1_23600V1.1	Pp1s59_196V6.1		Pp1s59_196V2.1	Phypa_182711	Phpat.001G093000	6468	0005524:0004674	16021	protein phosphorylation	ATP binding:protein serine/threonine kinase activity	integral component of membrane					gi|923703046|ref|XP_013660191.1|	PREDICTED: uncharacterized protein LOC106365288 [Brassica napus].	FUNHY15tr_m240lflr_TR21876_c0_g3_i1_3			GO:0005634	32.1538	22.2971	13.4965	31.5821	11.8459	24.0446	49.3724	44.1285	30.8633	22.2819	26.1321	32.559	16.2537	15.9641	13.181	15.1667	19.6101	20.0106				-1.45485
Pp3c1_23610V3.1	Pp3c1_23610V1.1	Pp1s59_195V6.1		Pp1s59_195V2.1	Phypa_44361		8152	8375	16020	metabolic process	acetylglucosaminyltransferase activity	membrane					gi|242038251|ref|XP_002466520.1|	hypothetical protein SORBIDRAFT_01g009220 [Sorghum bicolor].	FUNHY15tr_m240lflr_TR45070_c0_g1_i1_1_rc	MXL8.19; expressed protein [Arabidopsis thaliana]	MXL8.19; expressed protein [Arabidopsis thaliana]	GO:0016020
Pp3c1_23611V3.1		Pp1s59_195V6.1					8152	8375	16020	metabolic process	acetylglucosaminyltransferase activity	membrane	ARATHwo_AT5G11730.1	Core-2/I-branching beta-1,6-N-acetylglucosaminyltransferase family protein; INVOLVED IN: biological_process unknown; EXPRESSED IN: 23 plant structures; EXPRESSED DURING: 13 growth stages; CONTAINS InterPro DOMAIN/s: Core-2/I-Branching enzyme (InterPro:IPR021141); BEST Arabidopsis thaliana protein match is: Core-2/I-branching beta-1,6-N-acetylglucosaminyltransferase family protein (TAIR:AT5G25970.…			gi|514814228|ref|XP_004981886.1|	PREDICTED: uncharacterized protein LOC101780921 [Setaria italica].	FUNHY15tr_m240lflr_TR45070_c0_g1_i1_1_rc
Pp3c1_23620V3.1	Pp3c1_23620V1.1	Pp1s59_192V6.1	Pp1s59_190V6.1				0006259:0006974	16787		DNA metabolic process:cellular response to DNA damage stimulus	hydrolase activity						gi|769818448|ref|XP_011621363.1|	PREDICTED: uncharacterized protein LOC18428790 isoform X1 [Amborella trichopoda].	FUNHY15tr_m240lflr_TR16054_c0_g1_i2_7_rc				2.84293	1.50703	2.93021	2.18787	2.7244	2.02427	5.01485	4.38339	6.58045	4.76547	5.40529	4.65741	7.25173	5.96201	6.3127	4.74005	4.65315	5.02806
Pp3c1_23670V3.1	Pp3c1_23670V1.1	Pp1s59_188V6.1;Pp1s59_189V6.1		Pp1s59_188V2.1	Phypa_76520	Phpat.001G093400	6414	0003746:0005525:0003924	5737	translational elongation	translation elongation factor activity:GTP binding:GTPase activity	cytoplasm					gi|116786852|gb|ABK24265.1|	unknown [Picea sitchensis].	ATRANtr_onekp_ZTHV_1539	elongation factor-1A	elongation factor-1A	GO:0003746, GO:0003924, GO:0005525, GO:0005829, GO:0016779	112.865	202.482	160.892	223.722	213.108	169.886	121.625	173.585	222.267	252.85	202.326	159.806	132.334	178.952	132.139	187.042	164.727	143.042
Pp3c1_23680V3.1	Pp3c1_23680V1.1	Pp1s59_186V6.1	Pp1s59_190V6.1	Pp1s59_186V2.1:Pp1s59_190V2.1	Phypa_47123:Phypa_76521	Phpat.001G093500	0006310:0006281	0016788:0003676	5737	DNA recombination:DNA repair	hydrolase activity, acting on ester bonds:nucleic acid binding	cytoplasm			sp|Q7UG74|RUVX_RHOBA	Putative pre-16S rRNA nuclease	gi|743778215|ref|XP_010919560.1|	PREDICTED: uncharacterized protein LOC105043636 isoform X2 [Elaeis guineensis].	FUNHY15tr_m240lflr_TR16054_c0_g1_i2_7_rc	holliday junction resolvase	holliday junction resolvase	GO:0000150, GO:0003677, GO:0004518, GO:0006281, GO:0006310, GO:0009536	5.61549	5.26873	5.54934	5.21659	5.19245	5.95457	6.60565	6.45774	7.36071	6.36153	5.90547	7.42524	6.6127	6.46473	8.05534	5.93281	7.35781	7.20115
Pp3c1_23700V3.1	Pp3c1_23700V1.1	Pp1s59_183V6.1		Pp1s59_183V2.1	Phypa_44675	Phpat.001G093600											gi|674932017|emb|CDY01403.1|	BnaA07g11760D [Brassica napus].	PHYSPtr_m240lflr_YEPO_scaffold-YEPO-2081202-cf._Physcomicromitrium_sp._5_rc	T24C20.110; expressed protein [Arabidopsis thaliana]						0.0279227
Pp3c1_23750V3.1	Pp3c1_23750V1.1	Pp1s59_181V6.1				Phpat.001G093700	6414	0003746:0005525:0003924	5737	translational elongation	translation elongation factor activity:GTP binding:GTPase activity	cytoplasm					gi|116786852|gb|ABK24265.1|	unknown [Picea sitchensis].	ATRANtr_onekp_ZTHV_1539				48.4535	96.3755	73.3062	94.286	85.0568	75.2118	59.8943	74.318	104.45	112.568	85.8186	68.3722	56.2172	80.5593	57.2794	87.0767	68.1184	66.7148
Pp3c1_23760V3.1	Pp3c1_23760V1.1	Pp1s59_180V6.1				Phpat.001G093800													PHYSPtr_m240lflr_YEPO_scaffold-YEPO-2019435-cf._Physcomicromitrium_sp._3			GO:0016020	14.1185	9.95394	8.33143	5.41548	3.03495	6.74601	6.27406	6.02167	5.24457	4.17499	4.29918	4.00779	6.39019	6.03856	6.25493	7.28143	5.98528	5.30846
Pp3c1_23790V3.1	Pp3c1_23790V1.1	Pp1s59_175V6.1		Pp1s59_175V2.1	Phypa_76512	Phpat.001G093900	0051234:0023014:0019222:0044711:0009637:0016070:0009657:0034645:0000160:0006468	0004674:0005524:0000155		establishment of localization:signal transduction by phosphorylation:regulation of metabolic process:single-organism biosynthetic process:response to blue light:RNA metabolic process:plastid organization:cellular macromolecule biosynthetic process:phosphorelay signal transduction system:protein phosphorylation	protein serine/threonine kinase activity:ATP binding:phosphorelay sensor kinase activity		ARATHwo_AT5G58140.2	Membrane-bound protein serine/threonine kinase that functions as blue light photoreceptor in redundancy with PHO1. Involved in stomatal opening, chloroplast movement and phototropism. Mediates blue light-induced growth enhancements. PHOT1 and PHOT2 mediate blue light-dependent activation of the plasma membrane H+-ATPase in guard cell protoplasts. PHOT2 possesses two LOV (LOV1 and LOV2, for light-…	sp|P93025|PHOT2_ARATH	Phototropin-2	gi|823143303|ref|XP_012471452.1|	PREDICTED: phototropin-1 isoform X1 [Gossypium raimondii].	TIMAUtr_onekp_ZQRI_6859	serine threonine protein	serine threonine protein	GO:0000155, GO:0000160, GO:0004674, GO:0005524, GO:0006355, GO:0006468, GO:0016020	7.51304	7.67149	8.06105	7.43291	8.68584	7.52666	7.3734	4.20047	6.76933	7.38383	8.40622	5.37599	3.7661	4.54497	4.58872	5.70885	3.77799	5.16136
Pp3c1_23810V3.1	Pp3c1_23810V1.1	Pp1s59_173V6.1		Pp1s59_173V2.1	Phypa_182701	Phpat.001G094000	0006468:0009966	0005524:0004674		protein phosphorylation:regulation of signal transduction	ATP binding:protein serine/threonine kinase activity		ARATHwo_AT3G15220.1	Protein kinase superfamily protein; FUNCTIONS IN: protein serine/threonine kinase activity, protein kinase activity, kinase activity, ATP binding; INVOLVED IN: protein amino acid phosphorylation; LOCATED IN: cytoplasm, spindle; EXPRESSED IN: 21 plant structures; EXPRESSED DURING: 11 growth stages; CONTAINS InterPro DOMAIN/s: Protein kinase, ATP binding site (InterPro:IPR017441), Protein kinase, c…			gi|720013768|ref|XP_010260289.1|	PREDICTED: serine/threonine-protein kinase 4-like isoform X2 [Nelumbo nucifera].	CERPUGG1tr_m240lflr_isotig14957_10_rc	severin kinase	severin kinase	GO:0004674, GO:0005515, GO:0005524, GO:0005654, GO:0005829, GO:0006468	15.0288	14.0337	14.4163	13.8746	12.5508	15.149	15.3416	10.7774	13.9838	16.7218	15.7984	11.3765	16.3555	13.5257	16.9654	16.3513	11.5577	15.8945
Pp3c1_23830V3.1	Pp3c1_23830V1.1	Pp1s59_169V6.1		Pp1s59_169V2.1	Phypa_76508	Phpat.001G094200											gi|302821544|ref|XP_002992434.1|	hypothetical protein SELMODRAFT_430644 [Selaginella moellendorffii].	PHYSPtr_m240lflr_YEPO_scaffold-YEPO-2012830-cf._Physcomicromitrium_sp._5_rc	hypothetical protein, conserved [Trypanosoma cruzi]			5.85604	6.10698	6.87611	5.30979	5.30802	6.66826	11.6096	9.42901	8.71408	6.68347	7.20455	7.06983	7.23747	6.98956	7.11745	7.38352	5.74089	7.42417
Pp3c1_23850V3.1	Pp3c1_23850V1.1	Pp1s59_167V6.1		Pp1s59_167V2.1	Phypa_210098	Phpat.001G094300	6414	0003746:0005525:0003924	5737	translational elongation	translation elongation factor activity:GTP binding:GTPase activity	cytoplasm					gi|402234627|gb|AFQ37423.1|	translation elongation factor-1 alpha 2 [Larix kaempferi].	FUNHYSPOtr_m240lflr_Fh.sd_1278_CB1_8_rc	elongation factor-1A	elongation factor-1A	GO:0003746, GO:0003924, GO:0005525, GO:0005829, GO:0016779	171.911	252.225	272.313	292.013	326.2	261.975	137.36	121.116	186.396	203.105	182.143	191.156	250.411	249.993	270.709	227.747	260.057	208.648
Pp3c1_23870V3.1	Pp3c1_23870V1.1	Pp1s59_165V6.1				Phpat.001G094400	55114	0020037:0016705:0004497:0005506		oxidation-reduction process	heme binding:oxidoreductase activity, acting on paired donors, with incorporation or reduction of molecular oxygen:monooxygenase activity:iron ion binding		ARATHwo_AT5G07990.1	Required for flavonoid 3' hydroxylase activity. Enzyme abundance relative to CHS determines Quercetin/Kaempferol metabolite ratio.	sp|P48418|C75A1_PETHY	Flavonoid 3',5'-hydroxylase 1	gi|502118264|ref|XP_004496181.1|	PREDICTED: cytochrome P450 77A3-like [Cicer arietinum].	FUNHY15tr_m240lflr_TR47561_c0_g2_i1_2	flavonoid 3',5'-hydroxylase	flavonoid 3',5'-hydroxylase	GO:0004497, GO:0009055, GO:0016020, GO:0020037		0.065368	0.274597	0.210221	0.12141	0.0770207	0.501974	0.528144	0.184149	0.208372	0.228962	0.243814	0.498673	0.467871	0.175523	0.0435598	0.136374	0.318387
Pp3c1_23890V3.1	Pp3c1_23890V1.1																							1.74462							0.982956				0.819027			1.39509	0.485293
Pp3c1_23900V3.1	Pp3c1_23900V1.1	Pp1s59_163V6.1		Pp1s59_163V2.1	Phypa_182696	Phpat.001G094500	6414	0003746:0005525:0003924	5737	translational elongation	translation elongation factor activity:GTP binding:GTPase activity	cytoplasm					gi|116786852|gb|ABK24265.1|	unknown [Picea sitchensis].	FUNHYSPOtr_m240lflr_Fh.sd_1278_CB1_8_rc	elongation factor-1A	elongation factor-1A	GO:0003746, GO:0003924, GO:0004781, GO:0005525, GO:0005829, GO:0016779	304.765	417.931	400.224	502.047	409.097	399.621	307.193	285.099	389.499	373.73	366.823	351.799	403.648	426.579	424.093	398.578	391.606	366.348
Pp3c1_2390V3.1	Pp3c1_2390V1.1	Pp1s346_22V6.1		Pp1s346_22V2.1	Phypa_172360	Phpat.001G009200	6508	0004222:0005524:0008270	16021	proteolysis	metalloendopeptidase activity:ATP binding:zinc ion binding	integral component of membrane	ARATHwo_AT1G07510.1	encodes an FtsH protease that is localized to the mitochondrion	sp|Q0DHL4|FTSH8_ORYSJ	ATP-dependent zinc metalloprotease FTSH 8, mitochondrial	gi|901793391|gb|KMZ57197.1|	ATP-dependent zinc metalloprotease FTSH 8, mitochondrial [Zostera marina].	CERPUGG1tr_m240lflr_isotig14161_4	T9I4.16; FtsH protease, putative [EC:3.4.24.-] [Arabidopsis thaliana]	T9I4.16; FtsH protease, putative [EC:3.4.24.-] [Arabidopsis thaliana]	GO:0004222, GO:0005524, GO:0005739, GO:0006508, GO:0008270, GO:0008568, GO:0016020, GO:0016021, GO:0030163	7.22239	7.16614	9.59203	6.27748	8.09425	6.20818	7.18386	7.12156	9.62312	7.94658	7.57493	8.1501	8.43358	9.09548	8.80284	7.54623	7.27349	6.14051
Pp3c1_23920V3.1	Pp3c1_23920V1.1	Pp1s59_161V6.1		Pp1s59_161V2.1	Phypa_163704	Phpat.001G094600	6414	0003746:0005525:0003924	5737	translational elongation	translation elongation factor activity:GTP binding:GTPase activity	cytoplasm					gi|302774332|ref|XP_002970583.1|	hypothetical protein SELMODRAFT_171512 [Selaginella moellendorffii].	FUNHY15tr_m240lflr_TR48680_c1_g2_i26_5_rc	elongation factor-1A	elongation factor-1A	GO:0003746, GO:0003924, GO:0005525, GO:0005829, GO:0016779	344.263	472.048	445.807	534.44	478.12	446.909	315.142	346.514	463.603	474.208	418.459	374.984	408.872	465.373	422.705	461.141	416.966	391.744
Pp3c1_23930V3.1	Pp3c1_23930V1.1	Pp1s59_160V6.1		Pp1s59_160V2.1	Phypa_163703	Phpat.001G094700							ARATHwo_AT5G03740.1	HD2-type histone deacetylase HDAC. Involved in the ABA and stress responses. Mediates transcriptional repression	sp|Q8LJS2|HDT1_SOYBN	Histone deacetylase HDT1	gi|743764050|ref|XP_010912228.1|	PREDICTED: histone deacetylase HDT2 [Elaeis guineensis].	PHYSPtr_m240lflr_YEPO_scaffold-YEPO-2002973-cf._Physcomicromitrium_sp._3	histone deacetylase	histone deacetylase	GO:0003700, GO:0005622, GO:0008270, GO:0045449	20.4201	32.0645	29.6464	22.9336	26.8418	22.9848	23.4787	18.2661	27.1861	24.9721	24.9057	25.0014	30.5061	33.6577	31.4976	26.2396	21.4177	23.3445
Pp3c1_23940V3.1	Pp3c1_23940V1.1	Pp1s59_158V6.1		Pp1s59_158V2.1	Phypa_210091	Phpat.001G094800	0016192:0006886:0061025	5484	16020	vesicle-mediated transport:intracellular protein transport:membrane fusion	SNAP receptor activity	membrane					gi|727600731|ref|XP_010473337.1|	PREDICTED: syntaxin-124-like isoform X1 [Camelina sativa].	FUNHY15tr_m240lflr_TR27152_c0_g1_i1_1	Qa-SNARE, Sso1/Syntaxin1-type, SYP12A-group	Qa-SNARE, Sso1/Syntaxin1-type, SYP12A-group	GO:0005484, GO:0006886, GO:0016020, GO:0016192	0.234382	0.361968	0.453331	0.202448	0.389735	0.389407	0.281991	0.254307	0.199507	0.381267	0.463042	0.167713	0.277058	0.327688	0.274679	0.209745	0.350216	0.249124
Pp3c1_23960V3.1	Pp3c1_23960V1.1	Pp1s59_154V6.1		Pp1s59_154V2.1	Phypa_163700	Phpat.001G094900	0016192:0006886:0061025	5484	16020	vesicle-mediated transport:intracellular protein transport:membrane fusion	SNAP receptor activity	membrane					gi|116793914|gb|ABK26928.1|	unknown [Picea sitchensis].	PHYSPtr_onekp_YEPO_15481	Qa-SNARE, Sso1/Syntaxin1-type, SYP12A-group	Qa-SNARE, Sso1/Syntaxin1-type, SYP12A-group	GO:0005484, GO:0006886, GO:0016020, GO:0016192	6.05128	4.64767	7.00856	4.11407	4.84839	5.73694	11.1777	9.51384	9.47203	8.01	8.89692	7.69244	9.37092	11.3433	12.6397	9.30265	8.35835	10.2821
Pp3c1_23970V3.1	Pp3c1_23970V1.1	Pp1s59_152V6.1		Pp1s59_152V2.1	Phypa_19895	Phpat.001G095000											gi|836018430|ref|XP_004981052.2|	PREDICTED: RPM1-interacting protein 4-like isoform X1 [Setaria italica].	PHYSPtr_onekp_YEPO_9497	MDF20.29; NOI protein, nitrate-induced [Arabidopsis thaliana]			16.6785	27.2811	22.379	18.0997	14.3365	15.4394	15.4236	22.0708	16.218	20.3781	20.3152	15.1774	12.4292	12.8872	10.4978	15.0589	11.2336	14.9879
Pp3c1_23980V3.1	Pp3c1_23980V1.1	Pp1s59_151V6.1																						0.930679			0.0886449	0.253058	1.83253	0.674823	1.00839	0.365132	2.00606	0.457755	0.252066	0.652158	0.0961161	0.190826	0.199141
Pp3c1_23990V3.1	Pp3c1_23990V1.1	Pp1s59_150V6.1;Pp1s59_151V6.1																	PHYSPtr_m240lflr_YEPO_scaffold-YEPO-2007221-cf._Physcomicromitrium_sp._2_rc			GO:0016020	11.5711	19.4821	9.67569	2.81801	1.33816	7.22723	33.57	33.3928	15.7162	13.4447	14.4049	15.3456	11.5868	13.798	15.5291	13.6637	6.13424	21.4465
Pp3c1_24000V3.1	Pp3c1_24000V1.1	Pp1s59_148V6.1		Pp1s59_148V2.1	Phypa_182684	Phpat.001G095100	0010155:0006413:0009902:0046777:0019288:0034660:0042793:0010027	0005525:0003743:0003924	0009941:0009570	regulation of proton transport:translational initiation:chloroplast relocation:protein autophosphorylation:isopentenyl diphosphate biosynthetic process, methylerythritol 4-phosphate pathway:ncRNA metabolic process:transcription from plastid promoter:thylakoid membrane organization	GTP binding:translation initiation factor activity:GTPase activity	chloroplast envelope:chloroplast stroma			sp|Q67P86|IF2_SYMTH	Translation initiation factor IF-2	gi|731434389|ref|XP_003634785.2|	PREDICTED: translation initiation factor IF-2, chloroplastic [Vitis vinifera].	FUNHY15tr_m240lflr_TR8172_c0_g1_i1_11_rc	translation initiation factor if-2	translation initiation factor if-2	GO:0003743, GO:0003924, GO:0005525	32.3452	35.3179	30.5102	26.6026	38.747	31.6866	18.7671	29.4406	16.003	17.7093	16.4187	24.4689	23.4621	17.853	21.7661	16.8432	39.9242	24.5805
Pp3c1_2400V3.1	Pp3c1_2400V1.1	Pp1s346_21V6.1				Phpat.001G009300																	2.52448	2.54262	3.76141	3.15126	1.90363	2.50817	4.31372	4.45898	4.4143	4.07136	4.39083	3.71783	3.05353	3.84752	3.1755	2.12778	2.38498	3.09607
Pp3c1_24020V3.1	Pp3c1_24020V1.1	Pp1s59_145V6.1;Pp1s59_146V6.1		Pp1s59_144V2.1	Phypa_76490	Phpat.001G095200	0048367:0006355:0030154:0009791	0008289:0043565	5634	shoot system development:regulation of transcription, DNA-templated:cell differentiation:post-embryonic development	lipid binding:sequence-specific DNA binding	nucleus	ARATHwo_AT4G04890.1	Encodes a homeodomain protein that is expressed in the LI layer of the vegetative, floral and inflorescence meristems. Binds to the L1 box promoter element which is required in some proteins for L1 specific expression.	sp|Q93V99|PDF2_ARATH	Homeobox-leucine zipper protein PROTODERMAL FACTOR 2	gi|731409759|ref|XP_010657313.1|	PREDICTED: homeobox-leucine zipper protein HDG2 isoform X5 [Vitis vinifera].	PHYSPtr_m240lflr_YEPO_scaffold-YEPO-2008218-cf._Physcomicromitrium_sp._17_rc	T7B11.33; expressed protein [Arabidopsis thaliana]:tpa: tpa_inf: class iv hd-zip protein hdz44	:tpa: tpa_inf: class iv hd-zip protein hdz44	GO:0003700, GO:0005634, GO:0005654, GO:0006355, GO:0016491, GO:0043565, GO:0045449	1.87849	2.71858	2.08341	3.06337	3.4458	3.17073	2.82115	2.04066	3.28592	4.16902	3.80891	2.71116	3.5248	2.4263	3.37863	2.70516	4.3559	3.88069
Pp3c1_24070V3.1	Pp3c1_24070V1.1	Pp1s59_141V6.1
Pp3c1_24080V3.1	Pp3c1_24080V1.1	Pp1s59_141V6.1
Pp3c1_24090V3.1	Pp3c1_24090V1.1	Pp1s59_140V6.1		Pp1s59_140V2.1	Phypa_126453	Phpat.001G095400	35335	4725		peptidyl-tyrosine dephosphorylation	protein tyrosine phosphatase activity						gi|672126427|ref|XP_008786663.1|	PREDICTED: probable protein phosphatase 2C 27 isoform X1 [Phoenix dactylifera].	PHYSPtr_m240lflr_YEPO_scaffold-YEPO-2002049-cf._Physcomicromitrium_sp._12_rc	protein phosphatase	protein phosphatase	GO:0004722, GO:0005739, GO:0006470, GO:0008287, GO:0009536, GO:0046872	23.147	21.5333	17.7011	29.8325	20.2002	23.8266	27.8681	29.3029	22.5266	21.6717	25.0507	29.6365	22.2254	17.3814	21.5254	19.0314	25.91	25.7153
Pp3c1_24110V3.1	Pp3c1_24110V1.1	Pp1s59_135V6.1		Pp1s59_135V2.1	Phypa_163695														PHYSPtr_m240lflr_YEPO_scaffold-YEPO-2082016-cf._Physcomicromitrium_sp._2	MVE11.13; expressed protein	MVE11.13; expressed protein	GO:0016491, GO:0055114
Pp3c1_24111V3.1		Pp1s59_135V6.1															gi|356525582|ref|XP_003531403.1|	PREDICTED: autophagy-related protein 13-like isoform X1 [Glycine max].	PHYSPtr_m240lflr_YEPO_scaffold-YEPO-2082016-cf._Physcomicromitrium_sp._2											0.0286956		0.0407572	0.0149282	0.0227094		0.0415977		0.0142004	0.0148191	0.0129741
Pp3c1_24120V3.1	Pp3c1_24120V1.1	Pp1s59_132V6.1;Pp1s59_133V6.1		Pp1s59_133V2.1	Phypa_126323	Phpat.001G095600	0006412:0000028	3735	22627	translation:ribosomal small subunit assembly	structural constituent of ribosome	cytosolic small ribosomal subunit					gi|116787462|gb|ABK24517.1|	unknown [Picea sitchensis].	PHYSPtr_onekp_YEPO_11149	40s ribosomal protein sa	40s ribosomal protein sa	GO:0003735, GO:0005829, GO:0006412, GO:0015935	35.3438	42.9479	52.4148	49.1265	50.131	48.3526	39.1933	33.7959	39.0122	37.1808	36.2966	38.9629	45.456	49.5513	49.6415	48.5671	41.8491	41.8999
Pp3c1_2420V3.1	Pp3c1_2420V1.1	Pp1s346_19V6.1		Pp1s346_19V2.1	Phypa_34357	Phpat.001G009400	0071555:0006073	0016762:0004553	0005618:0048046	cell wall organization:cellular glucan metabolic process	xyloglucan:xyloglucosyl transferase activity:hydrolase activity, hydrolyzing O-glycosyl compounds	cell wall:apoplast					gi|823153031|ref|XP_012476351.1|	PREDICTED: xyloglucan endotransglucosylase/hydrolase protein 2-like [Gossypium raimondii].	FUNHY15tr_m240lflr_TR45922_c0_g1_i1_2	xyloglucan endotransglucosylase hydrolase protein 9	xyloglucan endotransglucosylase hydrolase protein 9	GO:0005576, GO:0005618, GO:0006073, GO:0016020, GO:0016762, GO:0048046												0.0815375						0.0186334
Pp3c1_24220V3.1	Pp3c1_24220V1.1	Pp1s59_127V6.1		Pp1s59_127V2.1	Phypa_76482																	GO:0016020
Pp3c1_24280V3.1	Pp3c1_24280V1.1	Pp1s59_125V6.1		Pp1s59_125V2.1	Phypa_210076	Phpat.001G095800	6508	4185		proteolysis	serine-type carboxypeptidase activity						gi|148906821|gb|ABR16556.1|	unknown [Picea sitchensis].	PHYSPtr_m240lflr_YEPO_scaffold-YEPO-2018241-cf._Physcomicromitrium_sp._1	at3g45010 f14d17_80	at3g45010 f14d17_80	GO:0004185, GO:0006508, GO:0009536, GO:0016020, GO:0016023	23.705	23.261	23.0681	20.1999	21.8768	23.4078	19.9231	19.634	21.3571	20.1576	20.8359	22.9627	23.6955	20.6785	21.724	20.6818	19.9643	22.4192
Pp3c1_24295V3.1																			HYDMA_Hma2.203610
Pp3c1_24300V3.1	Pp3c1_24300V1.1	Pp1s59_122V6.1		Pp1s59_122V2.1	Phypa_106052	Phpat.001G095900	6412	3735	5840	translation	structural constituent of ribosome	ribosome					gi|778728709|ref|XP_011659463.1|	PREDICTED: 60S ribosomal protein L6-1 [Cucumis sativus].	PHYSPtr_onekp_YEPO_2720	60s ribosomal protein	60s ribosomal protein	GO:0003735, GO:0005840, GO:0006412	210.707	257.551	266.899	277.635	272.564	253.982	192.988	222.241	249.682	251.545	260.6	241.617	282.44	289.012	271.825	297.385	273.07	265.126
Pp3c1_24320V3.1	Pp3c1_24320V1.1	Pp1s59_121V6.1		Pp1s59_121V2.1	Phypa_76475												gi|302768311|ref|XP_002967575.1|	hypothetical protein SELMODRAFT_408689 [Selaginella moellendorffii].	SCHFAtr_onekp_IGUH_165828	fibrillarin, putative [Leishmania major]			1.92338	1.27801	1.30785	0.964162	0.46641	1.47413	5.44081	3.84046	2.89919	2.00693	3.2419	3.0393	1.18416	1.20798	1.17399	1.39848	0.598736	2.04763
Pp3c1_24330V3.1	Pp3c1_24330V1.1	Pp1s59_120V6.1		Pp1s59_120V2.1	Phypa_163687												gi|302768311|ref|XP_002967575.1|	hypothetical protein SELMODRAFT_408689 [Selaginella moellendorffii].	RADLItr_onekp_BNCU_86934	hypothetical protein [Dictyostelium discoideum]			4.48634	3.92685	3.29271	1.48281	0.333034	3.29584	12.8056	8.90968	4.62194	4.52688	5.35104	5.61789	2.6516	1.9601	3.61103	3.15445	2.24448	2.48905
Pp3c1_24340V3.1	Pp3c1_24340V1.1			Pp1s59_120V2.1	Phypa_163687	Phpat.001G096100													SCHFAtr_onekp_IGUH_15712	hypothetical protein [Dictyostelium discoideum]			3.30283	4.65717	2.62371	1.85579	1.97124	2.99566	7.23781	5.95134	3.91584	2.54495	3.49554	3.51971	2.64927	2.72112	2.8392	2.91343	1.75152	3.06691
Pp3c1_24350V3.1	Pp3c1_24350V1.1	Pp1s59_117V6.1		Pp1s59_117V2.1	Phypa_210069	Phpat.001G096200	0009651:0009750:0006833:0030003:0070838:0009853	0008453:0050281:0004760:0030170	0005777:0009570:0005886:0048046	response to salt stress:response to fructose:water transport:cellular cation homeostasis:divalent metal ion transport:photorespiration	alanine-glyoxylate transaminase activity:serine-glyoxylate transaminase activity:serine-pyruvate transaminase activity:pyridoxal phosphate binding	peroxisome:chloroplast stroma:plasma membrane:apoplast					gi|525314083|ref|NP_001265946.1|	Hop-interacting protein THI032 [Solanum lycopersicum].	FUNHY15tr_m240lflr_TR26030_c0_g1_i1_8_rc	aminotransferase 2	aminotransferase 2	GO:0030170, GO:0050281	0.276366	0.238587	0.214768	0.264896	0.184639	0.0937059	0.0636164	0.0803196	0.112021	0.063378	0.181066	0.10594	3.09185	1.68181	1.66834	1.53689	1.16142	0.750509
Pp3c1_24409V3.1																							0.596705		0.160294	0.0613577				0.539526				0.213488	0.0783724		0.179306		0.0928751	0.243936
Pp3c1_24420V3.1	Pp3c1_24420V1.1	Pp1s59_112V6.1																	FUNHY15tr_m240lflr_TR20218_c0_g2_i1_3_rc				7.5766	5.67948	3.57349	6.91978	0.278819	5.15897	15.4666	11.0508	8.8809	6.31657	9.39455	7.81225	12.2156	3.3211	4.56837	4.5016	1.9487	10.663
Pp3c1_24440V3.1	Pp3c1_24440V1.1	Pp1s59_111V6.1		Pp1s59_111V2.1	Phypa_163682	Phpat.001G096500	0006506:0016310:0006096	4618	16021	GPI anchor biosynthetic process:phosphorylation:glycolytic process	phosphoglycerate kinase activity	integral component of membrane			sp|A8IM75|PGK_AZOC5	Phosphoglycerate kinase	gi|302761292|ref|XP_002964068.1|	hypothetical protein SELMODRAFT_438792 [Selaginella moellendorffii].	FUNHY15tr_m240lflr_TR13104_c0_g1_i2_1	phosphoglycerate kinase	phosphoglycerate kinase	GO:0004618, GO:0006096	9.27745	7.38663	9.39755	7.25097	7.24079	8.09415	5.56204	6.20015	7.1444	6.1377	7.12367	5.07729	8.46701	8.90775	8.87583	7.1209	6.18124	8.05005
Pp3c1_24490V3.1																													0.99538				0.653784				0.208831			0.757607
Pp3c1_24500V3.1	Pp3c1_24500V1.1	Pp1s59_101V6.1;Pp1s59_102V6.1		Pp1s59_101V2.1	Phypa_46777	Phpat.001G096600											gi|514725121|ref|XP_004955657.1|	PREDICTED: uncharacterized protein LOC101770761 [Setaria italica].	PHYSPtr_m240lflr_YEPO_scaffold-YEPO-2081582-cf._Physcomicromitrium_sp._5_rc	F5N5.17; expressed protein [Arabidopsis thaliana]	F5N5.17; expressed protein [Arabidopsis thaliana]	GO:0009536	25.2257	33.983	38.8205	66.4187	72.9878	37.2621	24.2851	43.2453	28.5605	41.7295	55.53	33.261	36.6128	25.4902	26.4826	36.0042	32.5037	44.3452
Pp3c1_2450V3.1	Pp3c1_2450V1.1	Pp1s346_18V6.1		Pp1s346_18V2.1	Phypa_151814		0000278:0009908:0045893:0048511:0006346:0016246:0009938:0009736:2000377:0000956:0006396:0006486:0030154:0043687	16262	0005829:0005634	mitotic cell cycle:flower development:positive regulation of transcription, DNA-templated:rhythmic process:methylation-dependent chromatin silencing:RNA interference:negative regulation of gibberellic acid mediated signaling pathway:cytokinin-activated signaling pathway:regulation of reactive oxygen species metabolic process:nuclear-transcribed mRNA catabolic process:RNA processing:protein glycos…	protein N-acetylglucosaminyltransferase activity	cytosol:nucleus	ARATHwo_AT3G04240.1	Has O-linked N-acetyl glucosamine transferase activity. Similar to Arabidopsis SPY gene.	sp|Q9M8Y0|SEC_ARATH	Probable UDP-N-acetylglucosamine--peptide N-acetylglucosaminyltransferase SEC	gi|697133202|ref|XP_009620651.1|	PREDICTED: probable UDP-N-acetylglucosamine--peptide N-acetylglucosaminyltransferase SPINDLY [Nicotiana tomentosiformis].	FUNHY15tr_m240lflr_TR22001_c0_g1_i1_6_rc	signal transduction	signal transduction	GO:0005488, GO:0016740
Pp3c1_24530V3.1	Pp3c1_24530V1.1	Pp1s59_97V6.1;Pp1s59_98V6.1		Pp1s59_98V2.1	Phypa_47013	Phpat.001G096700							ARATHwo_AT5G59400.2	FUNCTIONS IN: molecular_function unknown; INVOLVED IN: biological_process unknown; LOCATED IN: chloroplast; EXPRESSED IN: 23 plant structures; EXPRESSED DURING: 13 growth stages; BEST Arabidopsis thaliana protein match is: PGR5-like B (TAIR:AT4G11960.1); Has 30201 Blast hits to 17322 proteins in 780 species: Archae - 12; Bacteria - 1396; Metazoa - 17338; Fungi - 3422; Plants - 5037; Viruses - 0; …	sp|Q8GYC7|PGL1B_ARATH	PGR5-like protein 1B, chloroplastic	gi|565368282|ref|XP_006350776.1|	PREDICTED: PGR5-like protein 1B, chloroplastic-like [Solanum tuberosum].	PHYSPtr_m240lflr_YEPO_scaffold-YEPO-2080729-cf._Physcomicromitrium_sp._3	F2O15.8; expressed protein	F2O15.8; expressed protein	GO:0005739, GO:0016020	10.5788	12.2283	14.2181	10.4924	17.9247	10.5148	12.486	18.9487	14.9129	14.7035	16.6288	14.1813	10.3417	11.5548	12.3131	14.5897	10.4108	11.5781
Pp3c1_24550V3.1	Pp3c1_24550V1.1	Pp1s59_95V6.1;Pp1s59_96V6.1;Pp1s59_97V6.1		Pp1s59_96V2.1	Phypa_76463	Phpat.001G096800	1901576:0044237			organic substance biosynthetic process:cellular metabolic process			ARATHwo_AT4G34100.1	Encodes a protein involved in cuticular wax biosynthesis. Lines carrying a recessive mutation in this locus have reduced chain-length distribution, weakly glaucous stem surface, and has reduced fertility in early flowers, non-spreading floret, downward cupped leaves, leaf waxes nearly pure C24 and C26 acid.	sp|F4JKK0|SUD1_ARATH	Probable E3 ubiquitin ligase SUD1	gi|255555385|ref|XP_002518729.1|	ssm4 protein, putative [Ricinus communis].	SCANEtr_onekp_IRBN_168261				4.24393	6.1001	3.77378	3.39499	1.88383	3.94375	12.3137	11.2971	8.65355	9.64404	6.02934	7.73603	7.53348	7.90073	8.18986	10.061	4.97766	11.0272
Pp3c1_24560V3.1	Pp3c1_24560V1.1	Pp1s59_93V6.1		Pp1s59_93V2.2	Phypa_49846	Phpat.001G097000	0055114:0006098:0019288:0000023:0019252:0010207:0019761	3955	9507	oxidation-reduction process:pentose-phosphate shunt:isopentenyl diphosphate biosynthetic process, methylerythritol 4-phosphate pathway:maltose metabolic process:starch biosynthetic process:photosystem II assembly:glucosinolate biosynthetic process	NAD(P)H dehydrogenase (quinone) activity	chloroplast					gi|567865419|ref|XP_006425332.1|	hypothetical protein CICLE_v10025822mg [Citrus clementina].	PHYSPtr_m240lflr_YEPO_scaffold-YEPO-2078102-cf._Physcomicromitrium_sp._1	F8D20.270; expressed protein	F8D20.270; expressed protein	GO:0000287, GO:0008253, GO:0009507, GO:0009536, GO:0016020	18.6565	15.0103	18.5464	14.0562	23.4584	16.566	19.0697	17.2657	15.6314	16.9406	18.4287	16.1375	16.2936	14.0391	17.6001	19.4747	14.1433	18.1699
Pp3c1_24570V3.1	Pp3c1_24570V1.1			Pp1s59_93V2.1	Phypa_210059	Phpat.001G097100	16311	0000287:0008253	5829	dephosphorylation	magnesium ion binding:5'-nucleotidase activity	cytosol					gi|672172246|ref|XP_008806210.1|	PREDICTED: 7-methylguanosine phosphate-specific 5'-nucleotidase A isoform X2 [Phoenix dactylifera].	FUNHY15tr_m240lflr_TR22016_c0_g1_i3_7_rc	cytosolic 5-nucleotidase iii	cytosolic 5-nucleotidase iii		14.1821	14.8459	15.7106	13.2754	13.4245	13.6297	32.5471	24.6266	22.5275	18.422	19.7831	23.0826	21.5188	20.0818	24.1445	21.1591	16.5446	19.4746
Pp3c1_24590V3.1	Pp3c1_24590V1.1	Pp1s59_92V6.1		Pp1s59_92V2.1	Phypa_126257		6810		16020	transport		membrane					gi|697142630|ref|XP_009625421.1|	PREDICTED: novel plant SNARE 13 [Nicotiana tomentosiformis].	PHYSPtr_m240lflr_YEPO_scaffold-YEPO-2015971-cf._Physcomicromitrium_sp._1_rc	npsn13 (novel plant snare 13)			1.90494	2.14886	1.81152	1.10476	0.570162	1.95922	9.72408	6.88959	3.60331	3.81634	3.7992	3.95295	3.45273	4.52757	2.43852	3.75034	2.17036	3.45764
Pp3c1_24600V3.1	Pp3c1_24600V1.1	Pp1s59_88V6.1;Pp1s59_90V6.1	Pp1s59_81V6.1;Pp1s59_89V6.1			Phpat.001G097300	0006364:0000184	0003723:0008026:0005524	0005829:0005634	rRNA processing:nuclear-transcribed mRNA catabolic process, nonsense-mediated decay	RNA binding:ATP-dependent helicase activity:ATP binding	cytosol:nucleus			sp|A7TKR8|DED1_VANPO	ATP-dependent RNA helicase DED1	gi|255572963|ref|XP_002527412.1|	dead box ATP-dependent RNA helicase, putative [Ricinus communis].	FUNHY15tr_m240lflr_TR15499_c0_g1_i11_2				13.5776	11.2047	12.8811	11.7715	17.2337	13.0271	15.1699	14.3429	22.9701	22.5835	18.687	13.3936	14.5605	17.8139	16.0763	15.6168	13.9691	15.9286
Pp3c1_2460V3.1	Pp3c1_2460V1.1	Pp1s346_18V6.1					0000278:0009908:0045893:0048511:0006346:0016246:0009938:0009736:2000377:0000956:0006396:0006486:0030154:0043687	16262	0005829:0005634	mitotic cell cycle:flower development:positive regulation of transcription, DNA-templated:rhythmic process:methylation-dependent chromatin silencing:RNA interference:negative regulation of gibberellic acid mediated signaling pathway:cytokinin-activated signaling pathway:regulation of reactive oxygen species metabolic process:nuclear-transcribed mRNA catabolic process:RNA processing:protein glycos…	protein N-acetylglucosaminyltransferase activity	cytosol:nucleus	ARATHwo_AT3G11540.1	Encodes a N-acetyl glucosamine transferase that may glycosylate other molecules involved in GA signaling. Contains a tetratricopeptide repeat region, and a novel carboxy-terminal region. SPY acts as both a repressor of GA responses and as a positive regulation of cytokinin signalling. SPY may be involved in reducing ROS accumulation in response to stress.	sp|O82039|SPY_PETHY	Probable UDP-N-acetylglucosamine--peptide N-acetylglucosaminyltransferase SPINDLY	gi|698513487|ref|XP_009801682.1|	na	FUNHY15tr_m240lflr_TR22001_c0_g1_i1_6_rc				0.0200075		0.0604648		0.0124758	0.0118717	0.0128954	0.0271354		0.0385412	0.0423497	0.0214746	0.0118252	0.091784	0.0270545		0.112107	0.0368062
Pp3c1_24610V3.1	Pp3c1_24610V1.1		Pp1s59_81V6.1																				0.0264837		0.0960441			0.0314289		0.0359189	0.0751434	0.0680222		0.0284258	0.0313058				0.0741977	0.0649601
Pp3c1_24640V3.1		Pp1s59_88V6.1				Phpat.001G097400	0006468:0009966	0005524:0004674		protein phosphorylation:regulation of signal transduction	ATP binding:protein serine/threonine kinase activity		ARATHwo_AT3G08720.1	Encodes a ribosomal-protein S6 kinase. Gene expression is induced by cold and salt (NaCl). Activation of AtS6k is regulated by 1-naphthylacetic acid and kinetin, at least in part, via a lipid kinase-dependent pathway. Phosphorylates specifically mammalian and plant S6 at 25 degrees C but not at 37 degrees C. Involved in translational up-regulation of ribosomal proteins.	sp|P68182|KAPCB_RAT	cAMP-dependent protein kinase catalytic subunit beta	gi|145506066|ref|XP_001438999.1|	hypothetical protein (macronuclear) [Paramecium tetraurelia strain d4-2].	FUNHY15tr_m240lflr_TR5678_c0_g1_i1_3_rc				9.926	10.249	7.33752	3.50257	1.55849	7.33038	86.0224	73.8972	37.0279	26.1823	31.1376	33.188	15.9961	18.626	17.1398	20.9445	10.6035	20.7999				-1.92893		2.86905	2.83987
Pp3c1_24660V3.1	Pp3c1_24660V1.1																						6.55797	7.21699	2.48412	6.30057	1.7605	5.23782	3.8237	4.77434	2.83925	2.50133	3.20239	3.62492	3.1684	1.61607	2.15051	1.43917	4.7059	1.44639
Pp3c1_24700V3.1	Pp3c1_24700V1.1		Pp1s59_81V6.1;Pp1s59_89V6.1			Phpat.001G097500	0006364:0000184	0003723:0008026:0005524	0005829:0005634	rRNA processing:nuclear-transcribed mRNA catabolic process, nonsense-mediated decay	RNA binding:ATP-dependent helicase activity:ATP binding	cytosol:nucleus	ARATHwo_AT2G42520.1	P-loop containing nucleoside triphosphate hydrolases superfamily protein; FUNCTIONS IN: helicase activity, nucleic acid binding, ATP binding, ATP-dependent helicase activity; LOCATED IN: peroxisome; EXPRESSED IN: 24 plant structures; EXPRESSED DURING: 15 growth stages; CONTAINS InterPro DOMAIN/s: RNA helicase, DEAD-box type, Q motif (InterPro:IPR014014), DNA/RNA helicase, DEAD/DEAH box type, N-te…	sp|Q755N4|DBP2_ASHGO	ATP-dependent RNA helicase DBP2	gi|567867803|ref|XP_006426524.1|	hypothetical protein CICLE_v10025421mg [Citrus clementina].	FUNHY15tr_m240lflr_TR15499_c0_g1_i11_2				4.58723	4.41549	4.15894	5.27968	6.02856	4.68579	5.50153	4.41017	9.10264	9.48906	7.35402	6.0143	5.0621	6.52626	6.53666	6.82009	5.65314	6.85428
Pp3c1_24720V3.1	Pp3c1_24720V1.1		Pp1s59_81V6.1																																0.0378484
Pp3c1_24730V3.1	Pp3c1_24730V1.1	Pp1s59_79V6.1		Pp1s59_79V2.1	Phypa_19850	Phpat.001G097600											gi|212274813|ref|NP_001130978.1|	uncharacterized protein LOC100192083 [Zea mays].	FUNHY15tr_m240lflr_TR20627_c0_g1_i1_3_rc	F1C12.70; expressed protein	F1C12.70; expressed protein	GO:0005739, GO:0005886, GO:0045271	12.1867	7.70292	10.3685	6.61477	6.95286	8.18542	21.3759	19.0974	13.9934	12.3001	18.5587	14.3079	15.8842	13.4438	15.3194	14.8235	13.2166	13.5873
Pp3c1_24760V3.1	Pp3c1_24760V1.1	Pp1s59_78V6.1		Pp1s59_78V2.1	Phypa_76454	Phpat.001G097800	0006261:0071897	0003887:0003677:0005524:0004386		DNA-dependent DNA replication:DNA biosynthetic process	DNA-directed DNA polymerase activity:DNA binding:ATP binding:helicase activity						gi|695072731|ref|XP_009383499.1|	PREDICTED: helicase and polymerase-containing protein TEBICHI isoform X1 [Musa acuminata subsp. malaccensis].	FUNHY15tr_m240lflr_TR29361_c0_g1_i1_13_rc	dna polymerase theta	dna polymerase theta	GO:0003676, GO:0005524, GO:0006310, GO:0008026, GO:0009536, GO:0009640, GO:0010468	4.64967	5.43882	5.08579	4.00626	4.39099	4.51325	4.62134	4.68831	4.84035	4.36517	4.35307	4.9631	5.72369	5.83378	4.8131	4.5024	4.83335	5.05746
Pp3c1_24779V3.1		Pp1s59_74V6.1																						0.260286		0.0956652			0.0666262	0.0700997		0.0663765			0.0610967		0.0698909		0.0724026	0.0633885
Pp3c1_24790V3.1	Pp3c1_24790V1.1	Pp1s59_73V6.1		Pp1s59_73V2.1	Phypa_182654	Phpat.001G098000	0006098:0019760:0043085:0019252:0015979:0000023:0019288	5509	0009570:0009654:0009543:0019898	pentose-phosphate shunt:glucosinolate metabolic process:positive regulation of catalytic activity:starch biosynthetic process:photosynthesis:maltose metabolic process:isopentenyl diphosphate biosynthetic process, methylerythritol 4-phosphate pathway	calcium ion binding	chloroplast stroma:photosystem II oxygen evolving complex:chloroplast thylakoid lumen:extrinsic component of membrane	ARATHwo_AT3G56650.1	Mog1/PsbP/DUF1795-like photosystem II reaction center PsbP family protein; FUNCTIONS IN: calcium ion binding; INVOLVED IN: photosynthesis; LOCATED IN: thylakoid, thylakoid lumen, chloroplast thylakoid lumen, chloroplast stroma, chloroplast; EXPRESSED IN: 21 plant structures; EXPRESSED DURING: 14 growth stages; CONTAINS InterPro DOMAIN/s: Photosystem II oxygen evolving complex protein PsbP (InterP…	sp|Q9LXX5|PPD6_ARATH	PsbP domain-containing protein 6, chloroplastic	gi|778726645|ref|XP_011659134.1|	PREDICTED: psbP domain-containing protein 4, chloroplastic isoform X2 [Cucumis sativus].	PHYSPtr_onekp_YEPO_78934	thylakoid lumenal kda chloroplast	thylakoid lumenal kda chloroplast	GO:0005509, GO:0009579, GO:0009654, GO:0015979, GO:0016020, GO:0019898	11.8863	11.4137	12.0247	13.1909	19.4403	12.9702	9.15436	13.901	8.32423	6.72685	10.2345	12.2715	8.51369	7.92181	9.60292	7.09879	12.7702	10.0993
Pp3c1_24800V3.1		Pp1s59_72V6.1																	CALCOtr_onekp_TAVP_75171							0.0718938								0.0833824
Pp3c1_24820V3.1	Pp3c1_24820V1.1	Pp1s59_71V6.1		Pp1s59_71V2.1	Phypa_210052	Phpat.001G098100	0000918:0010020:0008152	0005524:0030899:0042803	0009706:0009570	barrier septum site selection:chloroplast fission:metabolic process	ATP binding:calcium-dependent ATPase activity:protein homodimerization activity	chloroplast inner membrane:chloroplast stroma					gi|702250027|ref|XP_010060481.1|	PREDICTED: putative septum site-determining protein minD homolog, chloroplastic [Eucalyptus grandis].	FUNHY15tr_m240lflr_TR13722_c0_g2_i1_3	septum site-determining protein	septum site-determining protein	GO:0000166, GO:0000918, GO:0009236, GO:0009536, GO:0016887, GO:0042242	11.3598	12.0923	15.5652	6.76323	14.26	10.9441	15.4125	10.2488	13.6121	11.7156	11.8209	14.2739	17.5124	15.541	17.0752	13.013	12.3962	13.9623
Pp3c1_24830V3.1	Pp3c1_24830V1.1	Pp1s59_69V6.1				Phpat.001G098200													FUNHY15tr_m240lflr_TR71_c0_g1_i1_3			GO:0016020	1.25615	2.3875	1.07764	1.0875	1.16229	1.10601	1.61925	2.28072	2.29943	1.5091	1.65823	1.43525	1.22142	1.46056	1.01368	1.49579	1.10687	1.44117
Pp3c1_24840V3.1	Pp3c1_24840V1.1	Pp1s59_67V6.1		Pp1s59_67V2.1	Phypa_182646	Phpat.001G098300	0046165:0006694:0044237		0016021:0016023	alcohol biosynthetic process:steroid biosynthetic process:cellular metabolic process		integral component of membrane:cytoplasmic membrane-bounded vesicle					gi|720057050|ref|XP_010273861.1|	PREDICTED: transmembrane protein 87A-like [Nelumbo nucifera].	PHYSPtr_onekp_YEPO_6686	lung seven transmembrane receptor family expressed	lung seven transmembrane receptor family expressed	GO:0005794, GO:0005886, GO:0016020, GO:0016021, GO:0016023	21.8745	22.0685	26.1549	21.617	21.0882	22.2412	21.9628	18.6354	26.6143	22.9393	21.6384	23.1443	28.4343	30.6401	29.8269	27.1494	26.69	28.2876
Pp3c1_24850V3.1	Pp3c1_24850V1.1	Pp1s59_66V6.1		Pp1s59_66V2.1	Phypa_126406	Phpat.001G098400	0006468:0007275:0010017	0004672:0005524	44424	protein phosphorylation:multicellular organismal development:red or far-red light signaling pathway	protein kinase activity:ATP binding	intracellular part	ARATHwo_AT4G11110.1	Encodes a member of the SPA (suppressor of phyA-105) protein family (SPA1-SPA4). SPA proteins contain an N-terminal serine/threonine kinase-like motif followed by a coiled-coil structure and a C-terminal WD-repeat domain. SPA proteins function redundantly in suppressing photomorphogenesis in dark- and light-grown seedlings. SPA2 primarily regulates seedling development in darkness and has little …	sp|Q9T014|SPA2_ARATH	Protein SPA1-RELATED 2	gi|720033475|ref|XP_010266441.1|	PREDICTED: protein SPA1-RELATED 2-like isoform X2 [Nelumbo nucifera].	FUNHY15tr_m240lflr_TR5293_c5_g1_i20_2	ubiquitin ligase protein	ubiquitin ligase protein	GO:0004672, GO:0005524, GO:0006468, GO:0042802, GO:0043234, GO:0044464	21.0378	23.4383	19.0208	26.9373	19.9553	23.0792	21.0767	22.6367	23.8087	23.1577	24.0194	23.4289	21.5329	20.3224	20.9288	18.4933	25.1056	24.9106
[truncated: 33,604 more rows]
